# Supplementary material for: Development of a model system to study the regulation of patterning competency in regenerating axolotl limbs
Source: Research Square preprint supplement (doi:10.21203/rs.3.rs-3576567/v1), 2023-12-07
Supplement: Supplementary file 1 [file 8698047125dccc636e627a78.xlsx]

## Sheet: S2.1 NES Scores
Supplemental Data Table 2.1: NES Scores for GOBP Terms
GOBP Term	LW -> Mat	ND -> LW	Cluster
ANTERIOR POSTERIOR PATTERN SPECIFICATION	-1.17466	2.10145	2
POSITIVE REGULATION OF RECEPTOR SIGNALING PATHWAY VIA STAT	2.0839	-1.60408	4
DE NOVO PROTEIN FOLDING	1.22487	-2.02338	4
EMBRYONIC HINDLIMB MORPHOGENESIS	-1.0155	2.01547	2
CELL REDOX HOMEOSTASIS	2.00923	0.909016	3
NEGATIVE REGULATION OF LIPID LOCALIZATION	1.98843	1.46911	3
REGULATION OF ENDOPLASMIC RETICULUM STRESS INDUCED INTRINSIC APOPTOTIC SIGNALING PATHWAY	-0.760351	-1.98479	1
PITUITARY GLAND DEVELOPMENT	1.04961	1.97388	3
CELL FATE COMMITMENT	-0.884838	1.97205	2
POSITIVE REGULATION OF PROTEIN TYROSINE KINASE ACTIVITY	-0.799763	1.96107	2
POSITIVE REGULATION OF PROTEIN TARGETING TO MEMBRANE	-1.09272	-1.95471	1
REGULATION OF PROTEIN TYROSINE KINASE ACTIVITY	-1.06484	1.94964	2
REGIONALIZATION	-1.3219	1.94856	2
CARDIAC RIGHT VENTRICLE MORPHOGENESIS	-0.850547	1.94567	2
ENDOCRINE SYSTEM DEVELOPMENT	-0.772579	1.94402	2
DIENCEPHALON DEVELOPMENT	0.912544	1.94395	3
PATTERN SPECIFICATION PROCESS	-1.17359	1.93647	2
POSITIVE REGULATION OF RESPONSE TO ENDOPLASMIC RETICULUM STRESS	0.60565	-1.93605	4
NEGATIVE REGULATION OF ANION TRANSMEMBRANE TRANSPORT	-0.624599	-1.93418	1
EXIT FROM MITOSIS	-0.766262	-1.93414	1
HINDLIMB MORPHOGENESIS	-0.886424	1.9338	2
CELL FATE DETERMINATION	-1.20091	1.93159	2
REGULATION OF PROTEIN TARGETING TO MEMBRANE	-1.00587	-1.92943	1
REGULATION OF EPIDERMAL GROWTH FACTOR ACTIVATED RECEPTOR ACTIVITY	0.736379	1.92609	3
NEGATIVE REGULATION OF RECEPTOR SIGNALING PATHWAY VIA JAK STAT	1.25084	-1.92452	4
CATECHOL CONTAINING COMPOUND BIOSYNTHETIC PROCESS	1.26881	1.92229	3
FOREBRAIN GENERATION OF NEURONS	1.26547	1.91775	3
NEGATIVE REGULATION OF RECEPTOR SIGNALING PATHWAY VIA STAT	1.20048	-1.91227	4
EMBRYONIC APPENDAGE MORPHOGENESIS	-1.05107	1.91189	2
EMBRYONIC FORELIMB MORPHOGENESIS	-0.885906	1.90663	2
NEGATIVE REGULATION OF METAPHASE ANAPHASE TRANSITION OF CELL CYCLE	0.813054	-1.90546	4
PROTEIN AUTOUBIQUITINATION	-0.498091	-1.89266	1
POSITIVE REGULATION OF ERBB SIGNALING PATHWAY	0.83892	1.88891	3
HINDBRAIN DEVELOPMENT	-0.745898	1.87736	2
OUTFLOW TRACT SEPTUM MORPHOGENESIS	0.762338	1.87128	3
EMBRYONIC DIGIT MORPHOGENESIS	-0.780267	1.86655	2
INTERMEMBRANE LIPID TRANSFER	-0.839245	1.86405	2
POSITIVE REGULATION OF CARDIAC MUSCLE CELL PROLIFERATION	0.946443	1.8636	3
NEGATIVE REGULATION OF NUCLEAR DIVISION	0.748088	-1.86053	4
REGULATION OF EPIDERMIS DEVELOPMENT	0.986563	1.85443	3
THYROID GLAND DEVELOPMENT	-0.737151	1.85435	2
INTESTINAL ABSORPTION	-1.27383	1.85291	2
RECEPTOR RECYCLING	0.936606	1.85207	3
CHOLESTEROL EFFLUX	1.14379	1.84379	3
MESODERM MORPHOGENESIS	-1.14441	1.83965	2
ANIMAL ORGAN FORMATION	-0.720724	1.83785	2
REGULATION OF MITOTIC SISTER CHROMATID SEGREGATION	0.767375	-1.83089	4
CARDIAC EPITHELIAL TO MESENCHYMAL TRANSITION	-0.753109	1.82726	2
TRIGLYCERIDE CATABOLIC PROCESS	-0.964203	1.82434	2
MITOCHONDRIAL ATP SYNTHESIS COUPLED PROTON TRANSPORT	1.82254	-1.34162	4
CARDIAC CHAMBER MORPHOGENESIS	-0.847847	1.82249	2
HISTONE MRNA METABOLIC PROCESS	0.79654	-1.82053	4
GAMMA AMINOBUTYRIC ACID SIGNALING PATHWAY	-0.639317	1.82044	2
FEAR RESPONSE	-1.0846	1.82034	2
NEGATIVE REGULATION OF MYELOID LEUKOCYTE DIFFERENTIATION	-1.11568	1.81579	2
FOREBRAIN DEVELOPMENT	-0.779845	1.81148	2
COTRANSLATIONAL PROTEIN TARGETING TO MEMBRANE	-1.80325	-1.36356	1
CARDIAC ATRIUM MORPHOGENESIS	-0.814426	1.80116	2
AXIS SPECIFICATION	-0.846478	1.80081	2
NEUROTROPHIN TRK RECEPTOR SIGNALING PATHWAY	1.21292	1.80034	3
SALIVARY GLAND DEVELOPMENT	-0.617479	1.79774	2
HOMOLOGOUS CHROMOSOME PAIRING AT MEIOSIS	-1.79376	-0.572351	1
ENDOCARDIAL CUSHION FORMATION	-0.66251	1.79334	2
SUPEROXIDE METABOLIC PROCESS	-1.14125	1.79318	2
POSITIVE REGULATION OF SIGNALING RECEPTOR ACTIVITY	-1.02884	1.79246	2
PROTEIN LOCALIZATION TO ENDOPLASMIC RETICULUM	-1.79194	-1.44312	1
FORELIMB MORPHOGENESIS	-0.727241	1.79054	2
REGULATION OF RESPONSE TO ENDOPLASMIC RETICULUM STRESS	-1.1949	-1.78966	1
METAPHASE ANAPHASE TRANSITION OF CELL CYCLE	-1.08383	-1.78889	1
METENCEPHALON DEVELOPMENT	1.07153	1.78876	3
NUCLEAR TRANSCRIBED MRNA CATABOLIC PROCESS NONSENSE MEDIATED DECAY	-1.7886	-1.40859	1
CENTRAL NERVOUS SYSTEM NEURON DIFFERENTIATION	-0.843678	1.7816	2
REGULATION OF DIGESTIVE SYSTEM PROCESS	0.948021	1.77961	3
REGULATION OF CHROMOSOME SEPARATION	-1.12216	-1.77867	1
NEUROTROPHIN SIGNALING PATHWAY	1.24288	1.77521	3
CELL DIFFERENTIATION IN SPINAL CORD	-0.967896	1.77397	2
REGULATION OF KERATINOCYTE PROLIFERATION	-0.818865	1.7736	2
ESTABLISHMENT OF PROTEIN LOCALIZATION TO ENDOPLASMIC RETICULUM	-1.77353	-1.43202	1
REGULATION OF LIPOPROTEIN LIPASE ACTIVITY	-1.21979	1.77306	2
NEURON FATE COMMITMENT	-1.37768	1.77081	2
DORSAL VENTRAL PATTERN FORMATION	-1.17807	1.77046	2
ACYLGLYCEROL HOMEOSTASIS	-1.18727	1.76909	2
NEGATIVE REGULATION OF SMOOTH MUSCLE CELL MIGRATION	-1.00567	-1.76747	1
CELLULAR RESPONSE TO VITAMIN D	1.15108	1.76717	3
KERATINOCYTE DIFFERENTIATION	-0.885585	1.76535	2
BLOOD VESSEL REMODELING	-0.996382	1.76295	2
RESPONSE TO CORTICOSTEROID	1.18908	1.76154	3
DIGESTIVE SYSTEM PROCESS	-1.23298	1.76076	2
CARDIAC SEPTUM MORPHOGENESIS	-0.709227	1.75662	2
EATING BEHAVIOR	1.75645	-1.08011	4
REGULATION OF CARDIAC MUSCLE CELL PROLIFERATION	-0.672626	1.75502	2
STRIATED MUSCLE CELL PROLIFERATION	-0.871321	1.75446	2
ANTERIOR POSTERIOR AXIS SPECIFICATION	-1.27578	1.75377	2
VENTRAL SPINAL CORD DEVELOPMENT	-1.06056	1.75261	2
NEGATIVE REGULATION OF MYELOID CELL DIFFERENTIATION	-0.947949	1.7525	2
NEGATIVE REGULATION OF PROTEIN LOCALIZATION TO CELL PERIPHERY	-0.909099	1.75181	2
POSITIVE REGULATION OF NITRIC OXIDE METABOLIC PROCESS	-0.881313	1.75173	2
POSITIVE REGULATION OF LIPID CATABOLIC PROCESS	-1.0248	1.75146	2
NEGATIVE REGULATION OF AUTOPHAGY	0.737263	-1.7509	4
MOTOR NEURON AXON GUIDANCE	-0.916457	1.75074	2
TRANSFERRIN TRANSPORT	-0.810977	1.75009	2
NEGATIVE REGULATION OF TOR SIGNALING	-1.75006	0.912919	2
POSTSYNAPTIC SPECIALIZATION ASSEMBLY	1.74981	0.862975	3
FOREBRAIN NEURON DEVELOPMENT	-0.827466	1.74973	2
RESPONSE TO LEPTIN	1.12909	-1.74845	4
POSITIVE REGULATION OF CELLULAR RESPONSE TO INSULIN STIMULUS	-0.935434	-1.74458	1
REGULATION OF RECEPTOR SIGNALING PATHWAY VIA STAT	1.60192	-1.74417	4
NUCLEOSOME ORGANIZATION	-1.74369	-1.38154	1
G PROTEIN COUPLED RECEPTOR SIGNALING PATHWAY COUPLED TO CYCLIC NUCLEOTIDE SECOND MESSENGER	1.74206	1.71148	3
CELLULAR RESPONSE TO LIPOPROTEIN PARTICLE STIMULUS	-1.43034	1.73916	2
APPENDAGE DEVELOPMENT	-1.16391	1.73877	2
ESTABLISHMENT OF PROTEIN LOCALIZATION TO MITOCHONDRIAL MEMBRANE	-1.73591	1.11743	2
EPIDERMAL CELL DIFFERENTIATION	-0.754735	1.73528	2
RESPONSE TO VITAMIN D	-0.818432	1.7315	2
REGULATION OF STEROL TRANSPORT	1.15656	1.73003	3
CHROMOSOME ORGANIZATION INVOLVED IN MEIOTIC CELL CYCLE	-1.72909	0.411311	2
HOMOLOGOUS RECOMBINATION	-1.72339	-0.762583	1
SPERM AXONEME ASSEMBLY	0.484768	-1.72062	4
HOMOLOGOUS CHROMOSOME SEGREGATION	-1.71924	-0.565746	1
NEUTRAL LIPID CATABOLIC PROCESS	-0.94949	1.71858	2
BRANCHING INVOLVED IN SALIVARY GLAND MORPHOGENESIS	-0.572273	1.71651	2
PROTEIN LIPID COMPLEX ASSEMBLY	-1.02467	1.71613	2
PROTEIN TARGETING TO MEMBRANE	-1.71432	-1.49251	1
OSTEOBLAST PROLIFERATION	-1.45555	1.7143	2
NUCLEOSOME ASSEMBLY	-1.71271	-1.61488	1
NEGATIVE REGULATION OF G PROTEIN COUPLED RECEPTOR SIGNALING PATHWAY	-0.887712	1.71204	2
ORGANOPHOSPHATE ESTER TRANSPORT	-0.613506	1.71022	2
KERATINOCYTE PROLIFERATION	-0.752881	1.70684	2
NEGATIVE REGULATION OF CHROMOSOME ORGANIZATION	-1.00636	-1.70671	1
GLYCOSPHINGOLIPID METABOLIC PROCESS	-1.20417	-1.70563	1
AORTA MORPHOGENESIS	-1.06153	1.70351	2
VASCULAR ASSOCIATED SMOOTH MUSCLE CELL MIGRATION	-0.935167	-1.7025	1
RESPONSE TO AMYLOID BETA	0.834916	1.70147	3
BIOLOGICAL PROCESS INVOLVED IN INTRASPECIES INTERACTION BETWEEN ORGANISMS	-1.24625	1.70133	2
DETECTION OF CHEMICAL STIMULUS	1.40635	1.69809	3
INTRINSIC APOPTOTIC SIGNALING PATHWAY BY P53 CLASS MEDIATOR	-1.61935	1.69547	2
REGULATION OF LIPID CATABOLIC PROCESS	-1.15967	1.69547	2
CHROMOSOME SEPARATION	-1.01254	-1.69205	1
CARDIAC MUSCLE CELL PROLIFERATION	-0.889545	1.69003	2
MULTICELLULAR ORGANISMAL RESPONSE TO STRESS	-1.0044	1.68953	2
APPENDAGE MORPHOGENESIS	-1.18947	1.68913	2
REGULATION OF PROTEIN TARGETING	-0.808333	-1.68848	1
CARDIAC ATRIUM DEVELOPMENT	-0.828974	1.68825	2
BRANCHING MORPHOGENESIS OF AN EPITHELIAL TUBE	-0.916849	1.68706	2
APOPTOTIC PROCESS INVOLVED IN DEVELOPMENT	-0.797569	1.68576	2
ONE CARBON METABOLIC PROCESS	-1.26492	-1.68471	1
PROTEIN CONTAINING COMPLEX REMODELING	-0.976587	1.68376	2
REGULATION OF DNA DAMAGE RESPONSE SIGNAL TRANSDUCTION BY P53 CLASS MEDIATOR	-1.28671	1.68236	2
REGULATION OF AMINO ACID TRANSPORT	0.812994	1.68164	3
CELLULAR RESPONSE TO NUTRIENT	-1.05048	1.67903	2
REGULATION OF DNA RECOMBINATION	-1.67806	1.17535	2
NEGATIVE REGULATION OF DNA RECOMBINATION	-1.67672	-0.965553	1
NEGATIVE REGULATION OF PROTEIN LOCALIZATION TO MEMBRANE	-0.585029	1.67518	2
ESTABLISHMENT OF PROTEIN LOCALIZATION TO MEMBRANE	-1.6727	-1.52681	1
LONG CHAIN FATTY ACYL COA METABOLIC PROCESS	-0.712899	-1.67134	1
FORMATION OF PRIMARY GERM LAYER	-1.15746	1.67087	2
NEGATIVE REGULATION OF MUSCLE CELL DIFFERENTIATION	0.996781	1.67	3
NEGATIVE REGULATION OF LIPID TRANSPORT	1.66989	1.46785	3
TERMINATION OF RNA POLYMERASE II TRANSCRIPTION	1.17788	-1.66983	4
VIRAL GENE EXPRESSION	-1.66864	-1.42685	1
CELLULAR RESPONSE TO AMYLOID BETA	-0.689761	1.66703	2
INTRINSIC APOPTOTIC SIGNALING PATHWAY IN RESPONSE TO DNA DAMAGE BY P53 CLASS MEDIATOR	-1.66692	1.48372	2
MATING	1.66673	1.32529	3
SEROTONIN TRANSPORT	1.07993	1.66611	3
NEGATIVE REGULATION OF HORMONE SECRETION	-1.1626	1.66492	2
PROTEIN LOCALIZATION TO ENDOSOME	-1.24579	-1.6648	1
NEGATIVE REGULATION OF AMINE TRANSPORT	1.66372	1.3761	3
REACTIVE NITROGEN SPECIES METABOLIC PROCESS	-0.764171	1.66302	2
FATTY ACYL COA BIOSYNTHETIC PROCESS	-0.877898	-1.66211	1
PHOTORECEPTOR CELL DIFFERENTIATION	-0.650543	-1.65892	1
LIPID OXIDATION	-0.972797	-1.65739	1
POSITIVE REGULATION OF TRIGLYCERIDE METABOLIC PROCESS	-1.20694	1.65668	2
DIGESTION	-1.27209	1.65235	2
DNA REPLICATION INDEPENDENT NUCLEOSOME ORGANIZATION	-1.62503	-1.65134	1
EXTRACELLULAR TRANSPORT	0.716466	1.65108	3
MALE SEX DIFFERENTIATION	-0.968121	1.65049	2
POSITIVE REGULATION OF FATTY ACID METABOLIC PROCESS	0.929288	1.64776	3
APOPTOTIC PROCESS INVOLVED IN MORPHOGENESIS	-1.00742	1.64759	2
AORTA DEVELOPMENT	-1.04833	1.64736	2
TRANSLATIONAL INITIATION	-1.64688	1.31561	2
REGULATION OF NITRIC OXIDE METABOLIC PROCESS	0.942973	1.64666	3
CELLULAR RESPONSE TO VITAMIN	-0.948461	1.64652	2
CENTRAL NERVOUS SYSTEM NEURON DEVELOPMENT	-0.861552	1.64589	2
REGULATION OF ANION TRANSMEMBRANE TRANSPORT	-1.23208	-1.64473	1
CELL FATE SPECIFICATION	-1.41674	1.64463	2
POSITIVE REGULATION OF POTASSIUM ION TRANSPORT	-1.05926	1.64462	2
CHROMATIN REMODELING AT CENTROMERE	-1.56239	-1.6445	1
MITOCHONDRIAL RNA METABOLIC PROCESS	-1.64298	-0.741378	1
POSITIVE REGULATION OF PROTEIN LOCALIZATION TO MEMBRANE	-1.12309	-1.64207	1
NEURAL CREST CELL MIGRATION	-0.63812	1.64117	2
POSTSYNAPSE ASSEMBLY	1.64054	0.55169	3
CHROMATIN ASSEMBLY OR DISASSEMBLY	-1.63828	-1.32814	1
SPINAL CORD MOTOR NEURON DIFFERENTIATION	0.7653	1.63824	3
PHOSPHOLIPID TRANSPORT	-0.742755	1.6382	2
CELL PROLIFERATION IN FOREBRAIN	-0.804897	1.6377	2
AMINE BIOSYNTHETIC PROCESS	1.16738	1.63713	3
ENDODERM DEVELOPMENT	-0.968343	1.63522	2
ODONTOGENESIS	-0.795186	1.63391	2
POSITIVE REGULATION OF RESPONSE TO CYTOKINE STIMULUS	0.801551	1.63352	3
NEGATIVE REGULATION OF DNA METABOLIC PROCESS	-1.63283	-0.817642	1
SNRNA PROCESSING	-0.686435	-1.63038	1
PROTEIN INSERTION INTO MEMBRANE	-1.62998	1.05185	2
DNA DEPENDENT DNA REPLICATION MAINTENANCE OF FIDELITY	-1.62986	-0.593589	1
COLLAGEN METABOLIC PROCESS	0.848313	1.62922	3
NEGATIVE REGULATION OF PROTEIN MATURATION	-0.856728	-1.62719	1
ATP SYNTHESIS COUPLED PROTON TRANSPORT	1.6267	-1.31333	4
POSITIVE REGULATION OF DEFENSE RESPONSE TO VIRUS BY HOST	-1.62669	-1.13896	1
POSITIVE REGULATION OF PATTERN RECOGNITION RECEPTOR SIGNALING PATHWAY	0.815015	1.62419	3
NEURON MIGRATION	-0.673479	1.62349	2
NEURON FATE SPECIFICATION	-1.42665	1.62327	2
AXON ENSHEATHMENT IN CENTRAL NERVOUS SYSTEM	1.62202	0.79491	3
GASTRULATION	-1.10708	1.62163	2
RENAL SYSTEM VASCULATURE DEVELOPMENT	-0.500543	1.6208	2
NEGATIVE REGULATION OF NIK NF KAPPAB SIGNALING	1.44341	-1.62074	4
ADENYLATE CYCLASE ACTIVATING G PROTEIN COUPLED RECEPTOR SIGNALING PATHWAY	-0.853402	1.62016	2
POSITIVE REGULATION OF PROTEIN AUTOPHOSPHORYLATION	-1.6197	0.964607	2
POSITIVE REGULATION OF GLYCOLYTIC PROCESS	-1.61791	-1.30217	1
MUCOPOLYSACCHARIDE METABOLIC PROCESS	-1.02412	1.61677	2
REGULATION OF DOUBLE STRAND BREAK REPAIR	-1.61606	0.979728	2
MEIOSIS I CELL CYCLE PROCESS	-1.61603	0.620059	2
REPRODUCTIVE SYSTEM DEVELOPMENT	-1.08977	1.61577	2
NUCLEAR TRANSCRIBED MRNA CATABOLIC PROCESS	-1.61572	-1.43786	1
GLYCEROLIPID CATABOLIC PROCESS	-0.89204	1.61557	2
RESPONSE TO DEXAMETHASONE	1.20099	1.61499	3
NEURAL PRECURSOR CELL PROLIFERATION	0.857834	1.61495	3
CIRCADIAN SLEEP WAKE CYCLE	-1.05728	-1.61317	1
REGULATION OF CELL AGING	-1.06864	-1.61259	1
EYE PHOTORECEPTOR CELL DIFFERENTIATION	0.856243	-1.61197	4
REGULATION OF OSTEOCLAST DIFFERENTIATION	-1.1856	1.60797	2
RESPONSE TO COCAINE	-0.719703	1.60702	2
REGULATION OF RENAL SYSTEM PROCESS	1.60615	1.53602	3
REGULATION OF MICROTUBULE BASED MOVEMENT	-1.29587	-1.60393	1
MESODERMAL CELL DIFFERENTIATION	-1.26752	1.60257	2
REGULATION OF TRANSCRIPTION REGULATORY REGION DNA BINDING	-1.60221	1.10299	2
NEGATIVE REGULATION OF CELLULAR RESPONSE TO GROWTH FACTOR STIMULUS	-0.831637	1.60217	2
RENAL SYSTEM PROCESS	1.60149	1.38166	3
T CELL LINEAGE COMMITMENT	0.855918	1.60141	3
PROTON TRANSMEMBRANE TRANSPORT	1.19087	-1.60139	4
ENDOCRINE HORMONE SECRETION	0.995973	1.60109	3
MALE GENITALIA DEVELOPMENT	0.897934	1.60052	3
CARDIAC CHAMBER DEVELOPMENT	-0.876425	1.59887	2
CARDIAC MUSCLE TISSUE MORPHOGENESIS	-1.17048	1.59802	2
GLUTATHIONE METABOLIC PROCESS	1.31219	-1.5978	4
REGULATION OF ERBB SIGNALING PATHWAY	-0.912149	1.59771	2
REGULATION OF ANIMAL ORGAN FORMATION	0.846335	1.59769	3
MEIOTIC CELL CYCLE PROCESS	-1.5965	1.15476	2
HEAD MORPHOGENESIS	-0.991738	1.59595	2
MORPHOGENESIS OF A BRANCHING STRUCTURE	-0.915174	1.5958	2
COCHLEA MORPHOGENESIS	-1.10617	-1.59576	1
GENITALIA DEVELOPMENT	0.868667	1.5942	3
REGULATION OF DNA REPAIR	-1.59315	0.88924	2
ESTABLISHMENT OF PROTEIN LOCALIZATION TO PLASMA MEMBRANE	-0.758026	-1.59263	1
EPITHELIAL CELL DIFFERENTIATION	-0.876979	1.59248	2
REGULATION OF G PROTEIN COUPLED RECEPTOR SIGNALING PATHWAY	-1.08692	1.59245	2
NEGATIVE REGULATION OF EPITHELIAL CELL MIGRATION	1.59187	-0.929954	4
PROTEIN TARGETING	-1.59124	-1.34198	1
REGULATION OF DOUBLE STRAND BREAK REPAIR VIA HOMOLOGOUS RECOMBINATION	-1.59102	1.30436	2
SYMPATHETIC NERVOUS SYSTEM DEVELOPMENT	-1.21953	1.59098	2
ANGIOGENESIS INVOLVED IN WOUND HEALING	1.59067	0.964723	3
MESENCHYME DEVELOPMENT	-1.0283	1.59058	2
RESPONSE TO ARSENIC CONTAINING SUBSTANCE	-1.01129	1.59016	2
REGULATION OF DENDRITE MORPHOGENESIS	-1.58984	0.653607	2
SEX DIFFERENTIATION	-1.09309	1.58954	2
MIDBRAIN DEVELOPMENT	-0.945998	1.5894	2
POSITIVE REGULATION OF ORGAN GROWTH	-0.946498	1.58938	2
CELLULAR RESPONSE TO CORTICOSTEROID STIMULUS	1.34365	1.58863	3
REGULATION OF CALCIUM ION IMPORT	1.51165	1.58854	3
FEEDING BEHAVIOR	-0.994812	1.58784	2
REACTIVE OXYGEN SPECIES METABOLIC PROCESS	-0.956076	1.5878	2
MUSCLE ORGAN DEVELOPMENT	-0.736792	1.58651	2
HISTONE EXCHANGE	-1.58635	-1.19416	1
SLEEP	1.58613	0.728972	3
LENS FIBER CELL DIFFERENTIATION	-1.48545	1.58581	2
NEGATIVE REGULATION OF CALCIUM ION TRANSPORT	-1.22393	1.58503	2
NEGATIVE REGULATION OF ERK1 AND ERK2 CASCADE	-0.714541	1.58456	2
TISSUE REGENERATION	1.06021	1.58376	3
RESPONSE TO INCREASED OXYGEN LEVELS	-0.8614	-1.58313	1
MULTICELLULAR ORGANISMAL MOVEMENT	-1.58279	0.892003	2
REGULATION OF POTASSIUM ION TRANSPORT	-1.01907	1.58168	2
CARDIAC SEPTUM DEVELOPMENT	-0.831839	1.5805	2
NEGATIVE REGULATION OF POTASSIUM ION TRANSPORT	-1.00055	1.58037	2
TELENCEPHALON DEVELOPMENT	-0.694352	1.58011	2
POSITIVE REGULATION OF INTRINSIC APOPTOTIC SIGNALING PATHWAY	-0.984011	-1.57996	1
AMINOGLYCAN BIOSYNTHETIC PROCESS	-1.0699	1.5799	2
NEGATIVE REGULATION OF STRIATED MUSCLE CELL DIFFERENTIATION	1.0835	1.57768	3
RRNA MODIFICATION	-0.685814	1.57712	2
NEGATIVE REGULATION OF SIGNAL TRANSDUCTION BY P53 CLASS MEDIATOR	-1.32766	1.57663	2
POSITIVE REGULATION OF NUCLEOTIDE METABOLIC PROCESS	-1.57597	-1.15098	1
REGULATION OF CHROMOSOME SEGREGATION	-1.05139	-1.57573	1
HEMATOPOIETIC STEM CELL PROLIFERATION	-1.10607	1.57546	2
POSITIVE REGULATION OF REACTIVE OXYGEN SPECIES BIOSYNTHETIC PROCESS	-0.961053	1.57334	2
REGULATION OF INSULIN RECEPTOR SIGNALING PATHWAY	-1.08346	-1.57322	1
TYPE B PANCREATIC CELL DEVELOPMENT	1.16518	1.57219	3
GLANDULAR EPITHELIAL CELL DIFFERENTIATION	-0.756454	1.57043	2
REGULATION OF MUSCLE ORGAN DEVELOPMENT	-0.848652	1.57033	2
STRESS GRANULE ASSEMBLY	-1.57013	-0.93129	1
BONE DEVELOPMENT	-1.06577	1.56923	2
CRISTAE FORMATION	1.56786	1.39243	3
NEGATIVE REGULATION OF TRANSMEMBRANE RECEPTOR PROTEIN SERINE THREONINE KINASE SIGNALING PATHWAY	-1.16458	1.5675	2
SIGNAL TRANSDUCTION BY P53 CLASS MEDIATOR	-1.56593	1.37361	2
PROTEIN LIPID COMPLEX SUBUNIT ORGANIZATION	-0.976663	1.5652	2
POSITIVE REGULATION OF NEURON DEATH	-0.992488	1.56516	2
REGULATION OF MYELOID LEUKOCYTE DIFFERENTIATION	-0.97783	1.56463	2
SPECIFICATION OF ANIMAL ORGAN IDENTITY	-0.84289	1.56309	2
PROTEIN DNA COMPLEX SUBUNIT ORGANIZATION	-1.56283	-1.06381	1
REGULATION OF SIGNAL TRANSDUCTION BY P53 CLASS MEDIATOR	-1.56268	0.936362	2
DEFENSE RESPONSE TO GRAM POSITIVE BACTERIUM	-1.56241	1.00269	2
SEGMENTATION	-0.838161	1.56234	2
RESPONSE TO NICOTINE	0.958678	1.55956	3
MEIOTIC CHROMOSOME SEGREGATION	-1.55801	-0.72867	1
REGULATION OF SKELETAL MUSCLE TISSUE DEVELOPMENT	-1.00435	1.55765	2
DNA RECOMBINATION	-1.55757	1.04273	2
REGULATION OF TRIGLYCERIDE METABOLIC PROCESS	-1.22287	1.55705	2
SENSORY ORGAN DEVELOPMENT	-0.981264	1.55461	2
REGULATION OF TRANSCRIPTION BY RNA POLYMERASE I	-1.00846	1.55387	2
SPINAL CORD DEVELOPMENT	-0.725194	1.55384	2
REGULATION OF MYOTUBE DIFFERENTIATION	1.15005	1.55374	3
STEROID HORMONE BIOSYNTHETIC PROCESS	1.35286	-1.55169	4
RENAL SYSTEM PROCESS INVOLVED IN REGULATION OF SYSTEMIC ARTERIAL BLOOD PRESSURE	1.55097	1.36985	3
NEUROTRANSMITTER RECEPTOR TRANSPORT	-0.884194	-1.55079	1
ACTIVATION OF PROTEIN KINASE B ACTIVITY	-1.55065	1.09456	2
FOREBRAIN CELL MIGRATION	0.907212	1.55037	3
PEPTIDE SECRETION	-0.954234	1.55036	2
NUCLEOSIDE PHOSPHATE CATABOLIC PROCESS	-0.806297	1.5496	2
FOLIC ACID CONTAINING COMPOUND METABOLIC PROCESS	-0.91364	-1.5485	1
REGULATION OF STRIATED MUSCLE CELL DIFFERENTIATION	-0.856268	1.54792	2
NEGATIVE REGULATION OF MICROTUBULE POLYMERIZATION OR DEPOLYMERIZATION	-1.10028	1.54781	2
RESPONSE TO AMINO ACID STARVATION	-1.54729	0.948497	2
CARDIAC VENTRICLE MORPHOGENESIS	-1.06178	1.54718	2
RESPONSE TO ESTROGEN	-0.605409	1.54704	2
CYTOPLASMIC TRANSLATION	-1.54572	1.21963	2
RNA 5 END PROCESSING	-1.11454	1.54549	2
POSITIVE REGULATION OF MITOTIC NUCLEAR DIVISION	-1.17778	1.54515	2
NEGATIVE REGULATION OF RESPONSE TO DNA DAMAGE STIMULUS	-1.54511	1.10012	2
PROTEIN QUALITY CONTROL FOR MISFOLDED OR INCOMPLETELY SYNTHESIZED PROTEINS	-0.658609	-1.54489	1
ANATOMICAL STRUCTURE REGRESSION	1.54485	-1.14608	4
POSITIVE REGULATION OF HEART GROWTH	-0.793458	1.54391	2
INTRINSIC APOPTOTIC SIGNALING PATHWAY IN RESPONSE TO ENDOPLASMIC RETICULUM STRESS	-0.69742	-1.5433	1
COLLAGEN CATABOLIC PROCESS	1.34053	1.54305	3
NEGATIVE REGULATION OF PROTEASOMAL UBIQUITIN DEPENDENT PROTEIN CATABOLIC PROCESS	-0.634106	1.54255	2
POSITIVE REGULATION OF ATP METABOLIC PROCESS	-1.5425	-0.922907	1
HYALURONAN METABOLIC PROCESS	-1.01155	1.5417	2
MESONEPHROS DEVELOPMENT	-0.828049	1.54043	2
INTERFERON ALPHA PRODUCTION	-1.051	1.5393	2
REGULATION OF MUSCLE CELL DIFFERENTIATION	-0.968182	1.53836	2
POSITIVE REGULATION OF TRANSCRIPTION BY RNA POLYMERASE I	-0.932068	1.53835	2
AMINOGLYCAN METABOLIC PROCESS	-1.30983	1.53822	2
T CELL SELECTION	-0.616769	1.53705	2
RESPONSE TO DOPAMINE	-1.34099	1.53685	2
NEGATIVE REGULATION OF TRANSPORTER ACTIVITY	-1.36123	-1.53588	1
PROTEIN KINASE C ACTIVATING G PROTEIN COUPLED RECEPTOR SIGNALING PATHWAY	-0.703755	1.53573	2
NEGATIVE REGULATION OF HEMOPOIESIS	-0.959418	1.53414	2
ISOPRENOID METABOLIC PROCESS	-1.2137	1.53358	2
NEGATIVE REGULATION OF RNA SPLICING	-1.53334	1.41993	2
POSITIVE REGULATION OF EPITHELIAL TO MESENCHYMAL TRANSITION	-0.782216	1.53278	2
REGULATION OF INTRINSIC APOPTOTIC SIGNALING PATHWAY BY P53 CLASS MEDIATOR	-1.00502	1.53214	2
REGULATION OF TOR SIGNALING	-1.53164	-0.696442	1
SCHWANN CELL DEVELOPMENT	-1.53143	1.33972	2
NEGATIVE REGULATION OF BMP SIGNALING PATHWAY	-0.971193	1.53052	2
ORGAN GROWTH	-0.774672	1.53033	2
MUSCLE ORGAN MORPHOGENESIS	-1.07431	1.5301	2
EXCRETION	1.52972	1.39768	3
NEUTRAL AMINO ACID TRANSPORT	-0.968134	-1.52936	1
PALLIUM DEVELOPMENT	-0.90253	1.52837	2
NEGATIVE REGULATION OF CYSTEINE TYPE ENDOPEPTIDASE ACTIVITY	-0.749677	-1.5279	1
PEPTIDYL LYSINE DIMETHYLATION	-1.5279	-0.786509	1
TRANSLATIONAL ELONGATION	-1.33992	-1.5277	1
RESPONSE TO ORGANOPHOSPHORUS	-0.952289	-1.52746	1
MUSCLE CELL DEVELOPMENT	1.52743	-0.930847	4
NEGATIVE REGULATION OF MRNA PROCESSING	-1.52705	1.23311	2
NEURON PROJECTION GUIDANCE	-0.736406	1.52646	2
MEIOTIC CELL CYCLE	-1.52634	1.01266	2
FACE DEVELOPMENT	-0.9621	1.52608	2
POSITIVE REGULATION OF B CELL PROLIFERATION	0.937309	1.52598	3
POSITIVE REGULATION OF MUSCLE TISSUE DEVELOPMENT	-1.0612	1.5252	2
POSITIVE REGULATION OF LIPASE ACTIVITY	-0.828586	1.52471	2
ATP BIOSYNTHETIC PROCESS	1.52461	-1.33503	4
CELLULAR RESPONSE TO INORGANIC SUBSTANCE	-1.15147	1.52379	2
ATRIOVENTRICULAR VALVE DEVELOPMENT	-1.33542	1.52178	2
GLOMERULUS DEVELOPMENT	-0.632955	1.52171	2
REGULATION OF TORC1 SIGNALING	-1.52167	-0.954301	1
DIGESTIVE SYSTEM DEVELOPMENT	-0.951368	1.52106	2
POSITIVE REGULATION OF GLUCOSE IMPORT	-1.5206	-0.849851	1
ATP DEPENDENT CHROMATIN REMODELING	-1.5203	-1.24984	1
FEMALE SEX DIFFERENTIATION	-1.10448	1.52022	2
KIDNEY MORPHOGENESIS	1.09776	1.51993	3
MYD88 DEPENDENT TOLL LIKE RECEPTOR SIGNALING PATHWAY	-0.995162	1.51804	2
REGULATION OF ORGAN GROWTH	-0.973277	1.51719	2
NUCLEOBASE CONTAINING SMALL MOLECULE BIOSYNTHETIC PROCESS	-0.741711	1.51712	2
STEM CELL PROLIFERATION	-1.0543	1.51707	2
MIRNA METABOLIC PROCESS	-1.51695	-1.00284	1
RIBOSOME ASSEMBLY	-1.51646	-1.18809	1
HEART GROWTH	-0.815004	1.5149	2
MYELOID LEUKOCYTE CYTOKINE PRODUCTION	-0.604387	1.51262	2
BASEMENT MEMBRANE ORGANIZATION	1.51255	1.17127	3
ENTEROENDOCRINE CELL DIFFERENTIATION	1.19955	1.51229	3
NEGATIVE REGULATION OF PROTEASOMAL PROTEIN CATABOLIC PROCESS	-1.48202	1.51204	2
REGULATION OF CHOLESTEROL BIOSYNTHETIC PROCESS	-1.51141	1.32282	2
HEART MORPHOGENESIS	-1.00627	1.51135	2
REGULATION OF KERATINOCYTE DIFFERENTIATION	-0.879163	1.51057	2
METANEPHROS DEVELOPMENT	-0.930981	1.51016	2
NEGATIVE REGULATION OF PROTEIN CATABOLIC PROCESS	-1.40706	-1.50991	1
OLIGOSACCHARIDE METABOLIC PROCESS	-1.33044	1.50956	2
CENTROMERE COMPLEX ASSEMBLY	-1.5094	-1.31226	1
EMBRYONIC MORPHOGENESIS	-1.17423	1.5092	2
REGULATION OF PROTEIN STABILITY	-1.1097	-1.50854	1
REGULATION OF DNA METABOLIC PROCESS	-1.50787	-0.811961	1
VENTRICULAR CARDIAC MUSCLE TISSUE DEVELOPMENT	-0.978864	1.50729	2
NEGATIVE REGULATION OF FATTY ACID METABOLIC PROCESS	-1.41144	-1.50687	1
SYNAPTIC MEMBRANE ADHESION	1.50647	1.46173	3
DEVELOPMENT OF PRIMARY SEXUAL CHARACTERISTICS	-1.1572	1.5061	2
RESPONSE TO CATECHOLAMINE	-1.29444	1.50558	2
IRON ION TRANSPORT	-0.837208	1.5047	2
MAMMARY GLAND MORPHOGENESIS	0.774994	-1.50466	4
VENTRICULAR SEPTUM MORPHOGENESIS	1.04288	1.5046	3
VASCULAR ENDOTHELIAL GROWTH FACTOR PRODUCTION	-0.792693	1.5044	2
THYMUS DEVELOPMENT	-1.10448	1.50435	2
REGULATION OF RESPONSE TO DNA DAMAGE STIMULUS	-1.50317	1.25397	2
REGULATION OF RECEPTOR BINDING	-0.794723	1.50304	2
RHYTHMIC BEHAVIOR	-0.845336	-1.50301	1
VESICLE MEDIATED TRANSPORT TO THE PLASMA MEMBRANE	-0.601553	-1.50285	1
REGULATION OF LIPID TRANSPORT	1.24009	1.50258	3
STEROL TRANSPORT	0.935512	1.50246	3
RUFFLE ASSEMBLY	-0.583539	-1.50213	1
POSITIVE REGULATION OF PHOSPHATASE ACTIVITY	1.50026	1.45962	3
RIBONUCLEOSIDE TRIPHOSPHATE BIOSYNTHETIC PROCESS	1.50017	-1.21734	4
POSITIVE REGULATION OF SUBSTRATE ADHESION DEPENDENT CELL SPREADING	-0.890588	1.49949	2
REPLICATION FORK PROCESSING	-1.49944	-0.703995	1
MYD88 INDEPENDENT TOLL LIKE RECEPTOR SIGNALING PATHWAY	-1.08939	1.4992	2
ENDOCRINE PROCESS	-1.06373	1.49844	2
RESPONSE TO GROWTH HORMONE	0.983662	-1.49837	4
ADENYLATE CYCLASE MODULATING G PROTEIN COUPLED RECEPTOR SIGNALING PATHWAY	-0.853795	1.49834	2
POSITIVE REGULATION OF LEUKOCYTE MIGRATION	1.01335	-1.4976	4
CELLULAR RESPONSE TO DEXAMETHASONE STIMULUS	1.13672	1.49673	3
DNA INTEGRITY CHECKPOINT	-1.49671	-0.737324	1
PLATELET ACTIVATION	-1.21057	1.4962	2
POST GOLGI VESICLE MEDIATED TRANSPORT	-1.05652	-1.49571	1
REGULATION OF ORGANIC ACID TRANSPORT	1.2685	1.49568	3
DNA TEMPLATED TRANSCRIPTION TERMINATION	0.880221	-1.49534	4
GLYCOSPHINGOLIPID BIOSYNTHETIC PROCESS	-1.4951	0.977672	2
POSITIVE T CELL SELECTION	-0.72911	1.49465	2
LONG TERM SYNAPTIC DEPRESSION	-1.49415	-0.827638	1
SKELETAL SYSTEM DEVELOPMENT	-1.03045	1.49388	2
SKELETAL MUSCLE ADAPTATION	-1.00816	-1.49335	1
NEGATIVE REGULATION OF SIGNALING RECEPTOR ACTIVITY	-0.801471	1.49203	2
ANIMAL ORGAN MATURATION	-0.871919	1.49177	2
NEGATIVE CHEMOTAXIS	0.83623	1.49137	3
NEGATIVE REGULATION OF DNA REPAIR	-1.49121	-1.45644	1
RIBOSOMAL LARGE SUBUNIT ASSEMBLY	-1.4911	-1.36583	1
RESPONSE TO X RAY	-1.34159	1.49038	2
HEART FORMATION	-0.950926	1.48939	2
PROTEIN TRANSMEMBRANE TRANSPORT	-1.48879	-1.06706	1
GOLGI TO ENDOSOME TRANSPORT	-1.1708	-1.48876	1
CEREBELLAR CORTEX DEVELOPMENT	1.34925	1.48852	3
AUTONOMIC NERVOUS SYSTEM DEVELOPMENT	-1.19693	1.48836	2
INTRINSIC APOPTOTIC SIGNALING PATHWAY IN RESPONSE TO DNA DAMAGE	-1.48825	1.28216	2
REGULATION OF RAC PROTEIN SIGNAL TRANSDUCTION	-1.488	-1.45751	1
PEPTIDE BIOSYNTHETIC PROCESS	-1.48781	-1.15194	1
PROTEIN LOCALIZATION TO POSTSYNAPSE	1.03076	-1.48762	4
DOUBLE STRAND BREAK REPAIR	-1.48723	0.857399	2
WNT SIGNALING PATHWAY CALCIUM MODULATING PATHWAY	-1.04732	1.48715	2
RESPONSE TO METAL ION	-0.949177	1.4871	2
REGULATION OF PRESYNAPSE ORGANIZATION	1.48696	-1.02821	4
TERPENOID METABOLIC PROCESS	-1.0097	1.48684	2
CELLULAR RESPONSE TO LOW DENSITY LIPOPROTEIN PARTICLE STIMULUS	-1.48654	0.931456	2
POSITIVE REGULATION OF VIRAL GENOME REPLICATION	-1.48644	-0.831338	1
CELLULAR MODIFIED AMINO ACID METABOLIC PROCESS	-0.810318	-1.48642	1
MESENCHYMAL CELL DIFFERENTIATION	-0.952922	1.48539	2
ARTERY DEVELOPMENT	-1.18633	1.48529	2
FAT SOLUBLE VITAMIN METABOLIC PROCESS	-1.07114	1.48432	2
PURINE NUCLEOTIDE TRANSPORT	1.0605	1.48428	3
SODIUM ION HOMEOSTASIS	1.48421	1.41269	3
EMBRYONIC EYE MORPHOGENESIS	-1.48341	1.00627	2
REGULATION OF CYTOPLASMIC TRANSLATION	1.32672	-1.48311	4
REGULATION OF POSITIVE CHEMOTAXIS	1.04246	-1.4827	4
CORTICAL CYTOSKELETON ORGANIZATION	-0.657979	-1.48265	1
SUBSTRATE ADHESION DEPENDENT CELL SPREADING	-0.63378	1.48239	2
POSITIVE REGULATION OF GLUCOSE TRANSMEMBRANE TRANSPORT	-1.48233	-0.856706	1
REGULATION OF DENDRITIC SPINE DEVELOPMENT	-0.890213	-1.4817	1
CYTOPLASMIC PATTERN RECOGNITION RECEPTOR SIGNALING PATHWAY	-0.795196	1.48165	2
STEROL BIOSYNTHETIC PROCESS	-1.42544	1.48138	2
FLUID TRANSPORT	-1.48132	1.32534	2
REGULATION OF FEEDING BEHAVIOR	-1.48084	-1.03557	1
REGULATION OF ALCOHOL BIOSYNTHETIC PROCESS	-1.48019	1.15742	2
REGULATION OF PLASMA LIPOPROTEIN PARTICLE LEVELS	-1.30356	1.47976	2
OLIGOSACCHARIDE LIPID INTERMEDIATE BIOSYNTHETIC PROCESS	-0.590058	1.47971	2
POSTREPLICATION REPAIR	-1.47914	0.939568	2
RNA POLYADENYLATION	1.23624	-1.47897	4
ENDODERMAL CELL DIFFERENTIATION	-0.959152	1.47869	2
REGULATION OF AUTOPHAGY	-1.14259	-1.47859	1
EYE PHOTORECEPTOR CELL DEVELOPMENT	1.47772	-1.45251	4
REGULATION OF PEPTIDYL TYROSINE PHOSPHORYLATION	-0.816661	1.47673	2
SPERM EGG RECOGNITION	-1.47571	1.10413	2
DETECTION OF BIOTIC STIMULUS	-0.891552	1.47471	2
REGULATION OF TRANSCRIPTION BY RNA POLYMERASE III	-0.614909	-1.47467	1
RECOMBINATIONAL REPAIR	-1.4744	0.897129	2
CYTOPLASMIC MICROTUBULE ORGANIZATION	-1.47422	1.24201	2
LONG CHAIN FATTY ACID TRANSPORT	-1.47337	-1.01825	1
NEGATIVE REGULATION OF PROTEOLYSIS INVOLVED IN CELLULAR PROTEIN CATABOLIC PROCESS	-1.47332	1.42796	2
THIOESTER BIOSYNTHETIC PROCESS	-0.859194	-1.47275	1
NEGATIVE REGULATION OF BLOOD VESSEL ENDOTHELIAL CELL MIGRATION	1.25675	1.47206	3
POSITIVE REGULATION OF TELOMERE MAINTENANCE	-1.47195	-0.867961	1
POSITIVE REGULATION OF NUCLEAR DIVISION	-1.36708	1.47184	2
REGULATION OF LEUKOCYTE DIFFERENTIATION	-0.887627	1.47174	2
CORONARY VASCULATURE DEVELOPMENT	-1.47154	-0.792496	1
RETROGRADE TRANSPORT ENDOSOME TO PLASMA MEMBRANE	1.11316	-1.47072	4
PEPTIDYL TYROSINE AUTOPHOSPHORYLATION	-1.47045	1.20246	2
REGULATION OF CELLULAR RESPONSE TO INSULIN STIMULUS	-1.08206	-1.47033	1
ROOF OF MOUTH DEVELOPMENT	-0.95277	1.47007	2
NEGATIVE REGULATION OF GLIAL CELL DIFFERENTIATION	1.46997	-0.9842	4
CELL JUNCTION MAINTENANCE	-1.07378	-1.46974	1
RNA CATABOLIC PROCESS	-1.46848	-1.22607	1
PROTEIN K63 LINKED DEUBIQUITINATION	-1.46799	-0.99068	1
DNA PACKAGING	-1.46778	-1.11257	1
CHONDROITIN SULFATE BIOSYNTHETIC PROCESS	-0.494146	1.46773	2
REGULATION OF DENDRITE DEVELOPMENT	-1.46722	0.70196	2
REGULATION OF MEMBRANE PROTEIN ECTODOMAIN PROTEOLYSIS	-0.989552	1.46655	2
CHROMATIN SILENCING	-1.46642	1.13535	2
POSITIVE REGULATION OF DNA METABOLIC PROCESS	-1.46619	-1.07591	1
PTERIDINE CONTAINING COMPOUND METABOLIC PROCESS	-0.93456	-1.46615	1
NEUTROPHIL CHEMOTAXIS	-0.672295	-1.46406	1
REGULATION OF CELLULAR RESPONSE TO GROWTH FACTOR STIMULUS	-1.03312	1.46401	2
PHARYNGEAL SYSTEM DEVELOPMENT	1.12504	1.46341	3
TOR SIGNALING	-1.46332	0.828569	2
REGULATION OF TELOMERE CAPPING	-1.46222	-1.18683	1
NEGATIVE REGULATION OF UBIQUITIN DEPENDENT PROTEIN CATABOLIC PROCESS	-1.19759	1.46137	2
MYOTUBE CELL DEVELOPMENT	1.46061	1.12005	3
NUCLEOSIDE BISPHOSPHATE BIOSYNTHETIC PROCESS	-0.858863	-1.45968	1
TORC1 SIGNALING	-1.45874	-1.13077	1
EMBRYONIC ORGAN DEVELOPMENT	-1.24008	1.45817	2
REGULATION OF HEART GROWTH	-0.753316	1.45729	2
INTERLEUKIN 1 BETA PRODUCTION	-1.06878	1.45684	2
UROGENITAL SYSTEM DEVELOPMENT	-1.1253	1.45678	2
INTRINSIC APOPTOTIC SIGNALING PATHWAY	-1.45662	1.12887	2
CELLULAR DEFENSE RESPONSE	0.864289	1.4566	3
POSITIVE REGULATION OF INTERLEUKIN 12 PRODUCTION	-0.481318	1.4557	2
EXOCRINE SYSTEM DEVELOPMENT	-1.22887	1.45522	2
NUCLEOTIDE BINDING DOMAIN LEUCINE RICH REPEAT CONTAINING RECEPTOR SIGNALING PATHWAY	-0.777158	1.4539	2
OSSIFICATION	-1.03097	1.45367	2
SPINAL CORD PATTERNING	-1.45356	1.40188	2
BONE MORPHOGENESIS	-0.955235	1.45308	2
FATTY ACYL COA METABOLIC PROCESS	-0.845323	-1.45298	1
POSITIVE REGULATION OF EPITHELIAL CELL PROLIFERATION	-1.29427	1.45291	2
COLLAGEN FIBRIL ORGANIZATION	-1.39917	1.45237	2
RESPONSE TO PROSTAGLANDIN	-1.4522	0.726538	2
POSITIVE REGULATION OF AUTOPHAGY	-1.45196	-1.29423	1
MALE MEIOTIC NUCLEAR DIVISION	-1.45177	1.43982	2
REGULATION OF CELL DEVELOPMENT	-1.06226	1.4517	2
RIBOSOMAL LARGE SUBUNIT BIOGENESIS	-1.45074	-1.03237	1
NEGATIVE REGULATION OF CELLULAR PROTEIN CATABOLIC PROCESS	-1.45042	1.28808	2
DNA CONFORMATION CHANGE	-1.45028	-1.11223	1
POSITIVE REGULATION OF BLOOD VESSEL ENDOTHELIAL CELL MIGRATION	-0.686492	-1.44952	1
POSITIVE REGULATION OF MONONUCLEAR CELL MIGRATION	-0.702561	-1.44947	1
INNER EAR RECEPTOR CELL DEVELOPMENT	1.44842	0.917339	3
INNER MITOCHONDRIAL MEMBRANE ORGANIZATION	-0.899812	1.4482	2
RESPONSE TO INORGANIC SUBSTANCE	-0.990636	1.44731	2
GLANDULAR EPITHELIAL CELL DEVELOPMENT	1.17599	1.44714	3
TRIGLYCERIDE BIOSYNTHETIC PROCESS	-1.44705	-0.623631	1
MESENCHYME MORPHOGENESIS	-1.20033	1.44677	2
REGULATION OF CHOLESTEROL METABOLIC PROCESS	-1.44662	1.24275	2
LIPOPOLYSACCHARIDE MEDIATED SIGNALING PATHWAY	1.1378	1.4465	3
POSITIVE REGULATION OF LEUKOCYTE CHEMOTAXIS	0.796254	-1.4462	4
NEGATIVE REGULATION OF CALCIUM MEDIATED SIGNALING	1.446	0.8251	3
NEGATIVE REGULATION OF NOTCH SIGNALING PATHWAY	1.04725	1.44589	3
REGULATION OF OLIGODENDROCYTE DIFFERENTIATION	1.44574	-1.20472	4
REGULATION OF LIPID LOCALIZATION	1.0908	1.44563	3
DEFENSE RESPONSE TO GRAM NEGATIVE BACTERIUM	-1.44496	-1.12957	1
POSTSYNAPTIC MEMBRANE ORGANIZATION	1.44466	-0.914701	4
REGULATION OF PLATELET ACTIVATION	-1.35683	1.44449	2
PURINERGIC NUCLEOTIDE RECEPTOR SIGNALING PATHWAY	1.20853	-1.44394	4
REGULATION OF LEUKOCYTE CHEMOTAXIS	0.685274	-1.44372	4
ARTERY MORPHOGENESIS	-1.25643	1.44328	2
REGULATION OF DEFENSE RESPONSE TO VIRUS BY HOST	-1.44253	-0.96963	1
CELL CELL RECOGNITION	-1.4423	0.991015	2
RESPONSE TO UV	-1.44226	0.999336	2
PROTEIN TRANSMEMBRANE IMPORT INTO INTRACELLULAR ORGANELLE	-1.33157	-1.44194	1
REGULATION OF MITOTIC NUCLEAR DIVISION	-0.910378	-1.44162	1
ESTABLISHMENT OF EPITHELIAL CELL POLARITY	1.21227	-1.4412	4
SIGNAL TRANSDUCTION IN RESPONSE TO DNA DAMAGE	-1.44098	1.2713	2
POSITIVE REGULATION OF LONG TERM SYNAPTIC POTENTIATION	-1.44063	-0.715228	1
REGULATION OF NEURAL PRECURSOR CELL PROLIFERATION	-0.588982	1.44027	2
REGULATION OF PROTEIN LOCALIZATION TO SYNAPSE	-0.735446	-1.44022	1
RAB PROTEIN SIGNAL TRANSDUCTION	0.811657	-1.44015	4
POSITIVE REGULATION OF TRANSMEMBRANE TRANSPORT	-1.44001	0.795083	2
TRICARBOXYLIC ACID CYCLE	-1.21439	-1.43971	1
FATTY ACID DERIVATIVE METABOLIC PROCESS	-1.05424	-1.4397	1
PERIPHERAL NERVOUS SYSTEM DEVELOPMENT	-1.23675	1.43942	2
PHOTORECEPTOR CELL DEVELOPMENT	1.43936	-1.3669	4
POSITIVE REGULATION OF MUSCLE CELL APOPTOTIC PROCESS	-1.20812	1.43897	2
NEGATIVE REGULATION OF LIPID CATABOLIC PROCESS	-1.43861	1.14686	2
NEURON MATURATION	-0.545268	1.43858	2
REGULATION OF TOLL LIKE RECEPTOR 4 SIGNALING PATHWAY	-1.31233	-1.43719	1
POSITIVE REGULATION OF VASOCONSTRICTION	-0.73071	1.43651	2
CEREBRAL CORTEX DEVELOPMENT	-0.874647	1.43648	2
NUCLEOTIDE TRANSPORT	1.05536	1.43609	3
PROTEIN N LINKED GLYCOSYLATION	-1.08403	1.43552	2
OVARIAN FOLLICLE DEVELOPMENT	-1.40591	1.43546	2
PLATELET AGGREGATION	-1.37563	1.43431	2
INNER EAR RECEPTOR CELL STEREOCILIUM ORGANIZATION	1.43411	0.984128	3
RUFFLE ORGANIZATION	-0.467357	-1.43353	1
REGULATION OF PRODUCTION OF SMALL RNA INVOLVED IN GENE SILENCING BY RNA	-1.03948	-1.43277	1
NEGATIVE REGULATION OF TRANSFORMING GROWTH FACTOR BETA RECEPTOR SIGNALING PATHWAY	-1.24669	1.43254	2
REGULATION OF TRANSLATIONAL INITIATION	-0.916858	1.4317	2
SPHINGOLIPID METABOLIC PROCESS	-1.22219	-1.43141	1
SKELETAL MUSCLE TISSUE REGENERATION	-0.894238	1.43043	2
GLYCOLIPID BIOSYNTHETIC PROCESS	-1.26661	1.43012	2
INSULIN LIKE GROWTH FACTOR RECEPTOR SIGNALING PATHWAY	-0.846919	-1.42987	1
RESPONSE TO ATP	1.42982	-1.37572	4
NEGATIVE REGULATION OF PEPTIDYL SERINE PHOSPHORYLATION	-1.33173	1.42876	2
DNA DAMAGE RESPONSE SIGNAL TRANSDUCTION BY P53 CLASS MEDIATOR	-1.32633	1.42845	2
PH REDUCTION	-1.42803	0.800186	2
CYTOKINE PRODUCTION INVOLVED IN IMMUNE RESPONSE	-1.03953	1.42783	2
RESPONSE TO CAMP	-0.998399	-1.42753	1
SULFUR COMPOUND CATABOLIC PROCESS	-1.16813	-1.42746	1
SCHWANN CELL DIFFERENTIATION	-1.42746	1.2792	2
REGULATION OF HOMOTYPIC CELL CELL ADHESION	-1.42722	-1.17015	1
PLASMA LIPOPROTEIN PARTICLE CLEARANCE	-1.42706	1.36012	2
NUCLEOTIDE SUGAR BIOSYNTHETIC PROCESS	-1.16875	-1.42583	1
CELL CELL JUNCTION ASSEMBLY	-1.42575	0.795151	2
POSITIVE REGULATION OF CYTOKINE PRODUCTION INVOLVED IN IMMUNE RESPONSE	-1.09112	1.42571	2
CHAPERONE MEDIATED PROTEIN COMPLEX ASSEMBLY	-0.771834	-1.42565	1
THYROID HORMONE METABOLIC PROCESS	1.0377	1.42493	3
EAR DEVELOPMENT	-0.848343	1.42491	2
CARDIAC VENTRICLE DEVELOPMENT	-0.943022	1.42383	2
OVULATION CYCLE	0.950196	1.42339	3
EMBRYONIC CAMERA TYPE EYE MORPHOGENESIS	-1.42336	0.874839	2
HEART VALVE DEVELOPMENT	-0.976876	1.42323	2
NEGATIVE REGULATION OF RESPONSE TO ENDOPLASMIC RETICULUM STRESS	-1.42247	0.776161	2
CELLULAR RESPONSE TO TOXIC SUBSTANCE	1.42155	1.01254	3
RNA EXPORT FROM NUCLEUS	-1.42137	-0.936996	1
POSITIVE REGULATION OF TELOMERE MAINTENANCE VIA TELOMERE LENGTHENING	-1.42104	-1.04904	1
DNA DAMAGE RESPONSE DETECTION OF DNA DAMAGE	-1.42073	1.12437	2
EMBRYONIC ORGAN MORPHOGENESIS	-1.25363	1.42068	2
PRODUCTION OF MOLECULAR MEDIATOR OF IMMUNE RESPONSE	-1.05918	1.42053	2
SOMITOGENESIS	-1.08809	1.42025	2
GOLGI TO PLASMA MEMBRANE TRANSPORT	-0.940051	-1.42024	1
NEGATIVE REGULATION OF CATION TRANSMEMBRANE TRANSPORT	-1.41989	1.00908	2
POSITIVE REGULATION OF INTERFERON BETA PRODUCTION	-0.976459	1.41985	2
REGULATION OF UBIQUITIN PROTEIN TRANSFERASE ACTIVITY	1.06469	-1.41923	4
NAD METABOLIC PROCESS	-0.632179	-1.419	1
POSITIVE REGULATION OF EXTRACELLULAR MATRIX ORGANIZATION	-1.41844	-0.948489	1
NUCLEAR EXPORT	-1.4182	-0.839495	1
PRESYNAPSE ORGANIZATION	1.41794	-1.00159	4
POSITIVE REGULATION OF WOUND HEALING	-1.00084	1.41712	2
PYRIMIDINE CONTAINING COMPOUND CATABOLIC PROCESS	-1.09708	1.41693	2
REGULATION OF PROTEIN LOCALIZATION TO MEMBRANE	-1.10695	-1.41668	1
MESONEPHRIC TUBULE MORPHOGENESIS	1.0393	1.41623	3
INNER EAR AUDITORY RECEPTOR CELL DIFFERENTIATION	1.4159	0.89096	3
LOW DENSITY LIPOPROTEIN PARTICLE CLEARANCE	-1.4156	1.13304	2
REGULATION OF OXIDATIVE STRESS INDUCED CELL DEATH	-1.29798	1.41524	2
OUTFLOW TRACT MORPHOGENESIS	-0.773378	1.41462	2
NEPHRON DEVELOPMENT	-0.935247	1.41453	2
ESTABLISHMENT OF RNA LOCALIZATION	-1.41448	-0.870528	1
MODULATION BY SYMBIONT OF ENTRY INTO HOST	-1.14734	1.41435	2
VASOCONSTRICTION	-1.23628	1.41426	2
CRANIAL SKELETAL SYSTEM DEVELOPMENT	-1.19876	1.4139	2
POSITIVE REGULATION OF POTASSIUM ION TRANSMEMBRANE TRANSPORT	-0.984822	1.41353	2
DEVELOPMENT OF PRIMARY FEMALE SEXUAL CHARACTERISTICS	-1.14149	1.41339	2
AXONEME ASSEMBLY	0.76586	-1.41335	4
PROTEIN DESTABILIZATION	-0.430467	-1.41326	1
POSITIVE REGULATION OF RNA SPLICING	-1.25741	1.41321	2
REGULATION OF EPITHELIAL CELL DIFFERENTIATION	-0.89624	1.4128	2
ESTABLISHMENT OF PROTEIN LOCALIZATION TO ORGANELLE	-1.41258	-1.17104	1
RAC PROTEIN SIGNAL TRANSDUCTION	-1.4125	-1.14373	1
POSITIVE REGULATION OF PEPTIDYL TYROSINE PHOSPHORYLATION	-0.758648	1.41194	2
NEGATIVE REGULATION OF SMOOTH MUSCLE CELL PROLIFERATION	-1.41173	-1.34379	1
ESTABLISHMENT OF SPINDLE ORIENTATION	-1.41161	1.01154	2
ORGANOPHOSPHATE CATABOLIC PROCESS	-0.837284	1.41148	2
TRABECULA FORMATION	0.824273	1.41135	3
POSITIVE REGULATION OF EPIDERMIS DEVELOPMENT	-1.28028	1.41124	2
NEGATIVE REGULATION OF TRANSMEMBRANE TRANSPORT	-1.41095	-1.3894	1
G2 DNA DAMAGE CHECKPOINT	-1.41051	-0.807533	1
RECEPTOR LOCALIZATION TO SYNAPSE	0.902669	-1.41036	4
PANCREAS DEVELOPMENT	-0.743411	1.41033	2
FATTY ACID DERIVATIVE BIOSYNTHETIC PROCESS	-0.979397	-1.41024	1
MAST CELL ACTIVATION	1.41019	-0.681308	4
DNA GEOMETRIC CHANGE	-1.41015	-0.830366	1
REGULATION OF FIBROBLAST GROWTH FACTOR RECEPTOR SIGNALING PATHWAY	-0.595232	1.40983	2
CELL MIGRATION INVOLVED IN SPROUTING ANGIOGENESIS	-0.676885	-1.40914	1
SENSORY SYSTEM DEVELOPMENT	-0.941818	1.40825	2
PEPTIDYL TYROSINE MODIFICATION	-0.99025	1.40821	2
LEARNING	-1.03167	1.40811	2
SPHINGOLIPID BIOSYNTHETIC PROCESS	-1.40792	0.807123	2
DOPAMINERGIC NEURON DIFFERENTIATION	-1.27042	1.40781	2
ATRIAL SEPTUM DEVELOPMENT	-0.993213	1.4076	2
THIOESTER METABOLIC PROCESS	-0.903015	-1.40755	1
CELLULAR RESPONSE TO CARBOHYDRATE STIMULUS	-1.40751	1.28069	2
REGULATION OF TRANSMEMBRANE RECEPTOR PROTEIN SERINE THREONINE KINASE SIGNALING PATHWAY	-1.12509	1.40751	2
CELLULAR RESPONSE TO CHEMICAL STRESS	-1.11334	1.40697	2
RESPONSE TO ALKALOID	-0.819554	1.40683	2
ADRENAL GLAND DEVELOPMENT	0.924764	1.40682	3
NEURAL TUBE PATTERNING	-0.656197	1.4066	2
REGULATION OF INTRACELLULAR PROTEIN TRANSPORT	-0.82049	-1.40644	1
CELLULAR GLUCOSE HOMEOSTASIS	-1.40626	1.23892	2
PRI MIRNA TRANSCRIPTION BY RNA POLYMERASE II	0.932623	-1.40599	4
MESENCHYMAL CELL PROLIFERATION	-1.40594	1.12298	2
MUSCLE CELL APOPTOTIC PROCESS	-1.13883	1.40593	2
REGULATION OF NEURON DIFFERENTIATION	-1.02228	1.40592	2
REGULATION OF CHROMOSOME ORGANIZATION	-1.27526	-1.40591	1
CELLULAR COMPONENT MAINTENANCE	-1.1755	-1.40587	1
NUCLEOSIDE TRIPHOSPHATE BIOSYNTHETIC PROCESS	1.40578	-1.14475	4
CHONDROITIN SULFATE PROTEOGLYCAN BIOSYNTHETIC PROCESS	-0.354203	1.40554	2
CELL CYCLE CHECKPOINT	-1.39272	-1.40487	1
CELL CYCLE ARREST	-1.40485	0.948006	2
INTERLEUKIN 17 PRODUCTION	-1.24784	1.40481	2
CELLULAR RESPONSE TO UV	-1.4048	0.9804	2
EMBRYONIC AXIS SPECIFICATION	-0.879738	1.40432	2
WOUND HEALING	-1.0382	1.40387	2
NEGATIVE REGULATION OF CALCIUM ION TRANSMEMBRANE TRANSPORT	-1.40375	1.17539	2
RIBOSOME BIOGENESIS	-1.40367	-1.06548	1
RESPONSE TO ENDOPLASMIC RETICULUM STRESS	-1.26165	-1.40325	1
BODY MORPHOGENESIS	-0.958761	1.40302	2
REGULATION OF HIPPO SIGNALING	-0.718787	-1.40266	1
POSITIVE REGULATION OF ENDOTHELIAL CELL PROLIFERATION	-1.40235	0.906954	2
RNA LOCALIZATION	-1.40223	-0.935248	1
RESPONSE TO PURINE CONTAINING COMPOUND	-1.05163	-1.40194	1
REGULATION OF SIGNALING RECEPTOR ACTIVITY	-0.905366	1.40176	2
VENTRICULAR SEPTUM DEVELOPMENT	-0.941596	1.40152	2
SMOOTH MUSCLE CELL APOPTOTIC PROCESS	-1.33677	1.40042	2
POSITIVE REGULATION OF B CELL ACTIVATION	-0.919497	1.40042	2
CELL AGING	-1.40019	-1.12276	1
REGULATION OF POLYSACCHARIDE BIOSYNTHETIC PROCESS	0.975806	1.40015	3
MYOTUBE DIFFERENTIATION	1.14373	1.39996	3
TELOMERE CAPPING	-1.39981	-0.932581	1
EXTERNAL ENCAPSULATING STRUCTURE ORGANIZATION	-0.726874	1.39964	2
CHAPERONE MEDIATED PROTEIN FOLDING	1.24381	-1.39912	4
AMINO SUGAR METABOLIC PROCESS	-1.32174	-1.39861	1
REGULATION OF OSTEOBLAST PROLIFERATION	-0.977465	1.39841	2
MITOTIC SISTER CHROMATID SEGREGATION	-0.940519	-1.398	1
ENDOSOME ORGANIZATION	-1.39776	-0.425731	1
NEPHRON MORPHOGENESIS	1.2623	1.39718	3
CAMERA TYPE EYE DEVELOPMENT	-0.888023	1.39644	2
ACTIN MEDIATED CELL CONTRACTION	-0.863871	-1.39622	1
CALCIUM ION REGULATED EXOCYTOSIS	-1.39539	0.815418	2
HEART TRABECULA MORPHOGENESIS	0.708358	1.39528	3
MITOCHONDRIAL TRANSLATIONAL TERMINATION	-1.1082	-1.3948	1
NEGATIVE REGULATION OF BINDING	-1.39429	0.773737	2
ACID SECRETION	-1.05901	1.39424	2
NUCLEOTIDE SUGAR METABOLIC PROCESS	-1.05366	-1.39394	1
MESODERM DEVELOPMENT	-1.30556	1.39393	2
REGULATION OF CALCIUM ION DEPENDENT EXOCYTOSIS	-1.39313	0.890154	2
POSITIVE REGULATION OF LYMPHOCYTE MIGRATION	-0.848244	-1.39283	1
RESPONSE TO MISFOLDED PROTEIN	-0.575394	-1.39224	1
STEROID HORMONE SECRETION	1.39216	1.02945	3
POSITIVE REGULATION OF VIRAL PROCESS	-1.39191	-0.789842	1
TRIGLYCERIDE METABOLIC PROCESS	-1.0505	1.3917	2
SKELETAL MUSCLE ORGAN DEVELOPMENT	1.13342	1.39109	3
MITOCHONDRIAL GENE EXPRESSION	-1.39087	-0.901563	1
POSITIVE REGULATION OF RECEPTOR INTERNALIZATION	-0.653997	-1.39079	1
PROTEIN MODIFICATION BY SMALL PROTEIN REMOVAL	-1.11407	-1.39066	1
REGULATION OF SODIUM ION TRANSMEMBRANE TRANSPORTER ACTIVITY	-1.39035	-0.666762	1
ESTABLISHMENT OF MITOTIC SPINDLE ORIENTATION	-1.39001	1.07801	2
VIRAL TRANSLATION	-1.38974	-1.35266	1
POSITIVE REGULATION OF GENE EXPRESSION EPIGENETIC	-0.998739	-1.38891	1
EMBRYONIC CRANIAL SKELETON MORPHOGENESIS	-1.37067	1.38862	2
REGULATION OF WOUND HEALING	-1.16877	1.38814	2
NUCLEOTIDE EXCISION REPAIR DNA GAP FILLING	-1.38802	0.705717	2
POSITIVE REGULATION OF ACTIN FILAMENT BUNDLE ASSEMBLY	-0.772304	1.38786	2
TRANSEPITHELIAL TRANSPORT	-1.35172	1.38761	2
MITOTIC CELL CYCLE CHECKPOINT	-1.1826	-1.38619	1
REGULATION OF NUCLEAR DIVISION	-1.16642	-1.3857	1
POSITIVE REGULATION OF LIPID BIOSYNTHETIC PROCESS	-1.18498	1.38539	2
NEGATIVE REGULATION OF TUMOR NECROSIS FACTOR SUPERFAMILY CYTOKINE PRODUCTION	-0.718942	1.38515	2
EPITHELIAL TUBE MORPHOGENESIS	-0.923945	1.38489	2
REGULATION OF CELL MIGRATION INVOLVED IN SPROUTING ANGIOGENESIS	0.663559	-1.3846	4
MITOCHONDRIAL MEMBRANE ORGANIZATION	-1.21215	1.38447	2
MORPHOGENESIS OF AN EPITHELIAL FOLD	1.23246	1.38439	3
CELL DIFFERENTIATION INVOLVED IN METANEPHROS DEVELOPMENT	0.671671	1.38436	3
ERROR PRONE TRANSLESION SYNTHESIS	-1.38358	0.654249	2
CORTICAL ACTIN CYTOSKELETON ORGANIZATION	-0.837326	-1.38358	1
REGULATION OF CELLULAR RESPONSE TO TRANSFORMING GROWTH FACTOR BETA STIMULUS	-1.38328	1.15723	2
DENDRITE MORPHOGENESIS	-1.3826	0.474353	2
NON MOTILE CILIUM ASSEMBLY	-0.855861	-1.38247	1
STEROL HOMEOSTASIS	-0.765084	1.3823	2
POSITIVE REGULATION OF DNA RECOMBINATION	-1.3814	-0.530191	1
PROTEIN KINASE A SIGNALING	-1.38107	1.25627	2
ADULT LOCOMOTORY BEHAVIOR	-1.3225	1.38079	2
RESPONSE TO IRON ION	1.38073	0.940032	3
VIRAL RELEASE FROM HOST CELL	-1.38045	1.25624	2
REGULATION OF COLLAGEN METABOLIC PROCESS	-0.873825	1.37978	2
REGULATION OF PEPTIDYL THREONINE PHOSPHORYLATION	-1.28142	1.37971	2
HINDBRAIN MORPHOGENESIS	1.37963	0.749486	3
REGULATION OF INTRACELLULAR TRANSPORT	-0.797094	-1.3796	1
NEGATIVE REGULATION OF AXON EXTENSION INVOLVED IN AXON GUIDANCE	0.862104	1.37953	3
SEMAPHORIN PLEXIN SIGNALING PATHWAY	-0.699103	1.37923	2
POSITIVE REGULATION OF MESENCHYMAL CELL PROLIFERATION	-1.37902	-1.34573	1
POSTSYNAPTIC SPECIALIZATION ORGANIZATION	1.37895	-1.21471	4
PROCESS UTILIZING AUTOPHAGIC MECHANISM	-1.1041	-1.37865	1
SYNAPTONEMAL COMPLEX ORGANIZATION	-1.37832	-1.03851	1
NEGATIVE REGULATION OF DNA REPLICATION	-0.800869	1.37819	2
EXTRACELLULAR MATRIX DISASSEMBLY	1.00666	1.37797	3
POSITIVE REGULATION OF INTRACELLULAR TRANSPORT	-0.91829	-1.37795	1
SPLEEN DEVELOPMENT	1.06158	1.37792	3
POSITIVE REGULATION OF LYMPHOCYTE DIFFERENTIATION	-0.731239	1.37728	2
NEGATIVE REGULATION OF MITOCHONDRION ORGANIZATION	1.3771	0.859858	3
POSITIVE REGULATION OF NIK NF KAPPAB SIGNALING	-0.633384	1.37692	2
REGULATION OF INTRINSIC APOPTOTIC SIGNALING PATHWAY	-1.37571	-1.253	1
CELLULAR OXIDANT DETOXIFICATION	1.37543	0.995339	3
REGULATION OF LAMELLIPODIUM ASSEMBLY	1.37373	0.605623	3
NEGATIVE REGULATION OF COLD INDUCED THERMOGENESIS	-1.24557	1.37371	2
REGULATION OF HISTONE H3 K4 METHYLATION	-1.37363	1.08302	2
AMINOGLYCAN CATABOLIC PROCESS	-1.37352	0.906362	2
ENDOCARDIAL CUSHION MORPHOGENESIS	-1.00115	1.37328	2
PROTEIN FOLDING	-0.842451	-1.37269	1
FIBROBLAST GROWTH FACTOR RECEPTOR SIGNALING PATHWAY	-0.864734	1.37262	2
CELLULAR RESPONSE TO STARVATION	-1.37247	0.926363	2
ORGANIC HYDROXY COMPOUND TRANSPORT	-0.947926	1.37196	2
CELL FATE COMMITMENT INVOLVED IN FORMATION OF PRIMARY GERM LAYER	-0.987799	1.37181	2
REGULATION OF MACROPHAGE MIGRATION	1.37173	0.994147	3
PHENOL CONTAINING COMPOUND METABOLIC PROCESS	-0.928708	1.37165	2
CERAMIDE BIOSYNTHETIC PROCESS	-1.37157	1.043	2
NEGATIVE REGULATION OF CELL DIFFERENTIATION	-0.924578	1.371	2
REGULATION OF LONG TERM SYNAPTIC POTENTIATION	-1.37082	-0.71607	1
ORGANIC CYCLIC COMPOUND CATABOLIC PROCESS	-1.37065	1.10565	2
CELL VOLUME HOMEOSTASIS	-1.37036	0.650719	2
POSITIVE REGULATION OF RECEPTOR MEDIATED ENDOCYTOSIS	-0.707935	-1.36932	1
RESPONSE TO ACIDIC PH	-1.26781	-1.36899	1
NEGATIVE REGULATION OF PROTEIN DEPHOSPHORYLATION	-1.36898	0.711077	2
REGULATION OF VIRAL LIFE CYCLE	-1.36879	1.12667	2
POSITIVE REGULATION OF INTERLEUKIN 6 PRODUCTION	-1.07144	1.36855	2
CELLULAR ALDEHYDE METABOLIC PROCESS	-0.830656	-1.36849	1
ODONTOGENESIS OF DENTIN CONTAINING TOOTH	-0.886625	1.36808	2
HORMONE BIOSYNTHETIC PROCESS	1.36795	-1.12686	4
NEGATIVE REGULATION OF MUSCLE HYPERTROPHY	-0.800295	-1.36785	1
CELLULAR RESPONSE TO REACTIVE OXYGEN SPECIES	-1.17275	1.36778	2
SENSORY ORGAN MORPHOGENESIS	-1.17811	1.36772	2
POSITIVE REGULATION OF P38MAPK CASCADE	-1.36771	1.10082	2
LAMELLIPODIUM ASSEMBLY	1.36747	-0.693547	4
GLIAL CELL DEVELOPMENT	-0.823897	1.36722	2
ENDOCRINE PANCREAS DEVELOPMENT	-0.809176	1.36719	2
REGULATION OF BICELLULAR TIGHT JUNCTION ASSEMBLY	-1.29792	1.36708	2
EPIDERMIS MORPHOGENESIS	1.36701	-1.28051	4
PEPTIDYL THREONINE MODIFICATION	-1.36687	1.3623	2
RESPONSE TO PLATELET DERIVED GROWTH FACTOR	0.584706	1.3666	3
RESPONSE TO STEROID HORMONE	1.08057	1.36567	3
RESPONSE TO WOUNDING	-0.94975	1.3651	2
RESPONSE TO MINERALOCORTICOID	-0.897977	1.36504	2
EMBRYONIC HEART TUBE MORPHOGENESIS	-0.868227	1.36476	2
NEUTRAL LIPID BIOSYNTHETIC PROCESS	-1.36446	-0.582236	1
NEGATIVE REGULATION OF INTERLEUKIN 6 PRODUCTION	1.36432	1.25706	3
PEPTIDE HORMONE SECRETION	-1.03051	1.36412	2
POSITIVE REGULATION OF HISTONE H3 K4 METHYLATION	-1.36342	0.663814	2
AXON DEVELOPMENT	-0.817236	1.36252	2
ORGANELLE FISSION	-1.36218	-0.788345	1
BONE MINERALIZATION	-1.23248	1.36206	2
DEFENSE RESPONSE TO BACTERIUM	-1.36205	-0.97291	1
BLOOD VESSEL MORPHOGENESIS	-1.06955	1.36148	2
POSITIVE REGULATION OF NEURON DIFFERENTIATION	-1.36129	1.0907	2
CELLULAR RESPONSE TO EXTERNAL STIMULUS	-1.20336	1.36091	2
ESTABLISHMENT OF MITOTIC SPINDLE LOCALIZATION	-1.3609	0.973912	2
PROTEIN LOCALIZATION TO GOLGI APPARATUS	-1.14952	-1.36079	1
MUSCLE FILAMENT SLIDING	0.891687	1.36055	3
REGULATION OF GLUCOSE TRANSMEMBRANE TRANSPORT	-1.36024	-0.830911	1
RECEPTOR SIGNALING PATHWAY VIA STAT	1.21715	-1.35981	4
POSITIVE REGULATION OF NEURAL PRECURSOR CELL PROLIFERATION	-0.637427	1.35977	2
TISSUE MORPHOGENESIS	-1.00527	1.35946	2
TELOMERE MAINTENANCE VIA SEMI CONSERVATIVE REPLICATION	-1.35924	0.650076	2
SULFUR AMINO ACID METABOLIC PROCESS	-1.13324	-1.35915	1
SPINDLE LOCALIZATION	-1.35871	0.750986	2
HORMONE TRANSPORT	-1.00681	1.35832	2
REGULATION OF GLUCOSE IMPORT	-1.35735	-0.790945	1
REGULATION OF BIOLOGICAL PROCESS INVOLVED IN SYMBIOTIC INTERACTION	-1.35716	0.828182	2
TRABECULA MORPHOGENESIS	0.73422	1.35702	3
MITOCHONDRIAL TRANSMEMBRANE TRANSPORT	1.08251	-1.35666	4
POSITIVE REGULATION OF CHEMOKINE PRODUCTION	-1.35638	1.25173	2
DICARBOXYLIC ACID METABOLIC PROCESS	-0.830855	-1.35625	1
EMBRYONIC HEART TUBE DEVELOPMENT	-0.923385	1.35621	2
NEGATIVE REGULATION OF INTRINSIC APOPTOTIC SIGNALING PATHWAY	-1.33437	1.35604	2
POSITIVE REGULATION OF MITOCHONDRIAL OUTER MEMBRANE PERMEABILIZATION INVOLVED IN APOPTOTIC SIGNALING PATHWAY	-1.35574	0.918608	2
POSITIVE REGULATION OF STRESS FIBER ASSEMBLY	-0.892508	1.35564	2
NCRNA EXPORT FROM NUCLEUS	-1.35553	-0.836855	1
HISTONE H3 K9 MODIFICATION	-1.35536	0.51633	2
CYTOPLASMIC PATTERN RECOGNITION RECEPTOR SIGNALING PATHWAY IN RESPONSE TO VIRUS	0.958356	1.35518	3
REGULATION OF PEPTIDYL LYSINE ACETYLATION	-1.13489	1.35494	2
POSITIVE REGULATION OF CELLULAR PROTEIN LOCALIZATION	-1.11582	-1.35491	1
REGULATION OF MEIOTIC NUCLEAR DIVISION	-1.35485	0.892223	2
GLAND DEVELOPMENT	-0.951826	1.35482	2
MAMMARY GLAND EPITHELIUM DEVELOPMENT	0.858563	1.35471	3
GOLGI TO PLASMA MEMBRANE PROTEIN TRANSPORT	-1.07526	-1.35464	1
SIGNAL TRANSDUCTION INVOLVED IN CELL CYCLE CHECKPOINT	-1.3545	-0.8703	1
POSITIVE REGULATION OF NOTCH SIGNALING PATHWAY	1.35424	0.915152	3
REGULATION OF LYMPHOCYTE DIFFERENTIATION	-0.751874	1.35402	2
REGULATION OF SYNAPTIC TRANSMISSION GLUTAMATERGIC	0.85277	1.354	3
NEGATIVE REGULATION OF PEPTIDASE ACTIVITY	-0.902638	-1.35375	1
REGULATION OF SUBSTRATE ADHESION DEPENDENT CELL SPREADING	-0.797402	1.35347	2
POSITIVE REGULATION OF ANION TRANSMEMBRANE TRANSPORT	-1.35302	-0.925042	1
KIDNEY EPITHELIUM DEVELOPMENT	-0.981612	1.35273	2
INTERFERON GAMMA PRODUCTION	-1.09592	1.35234	2
BEHAVIOR	-1.00137	1.35222	2
DEVELOPMENTAL GROWTH	-0.888557	1.35208	2
APOPTOTIC CELL CLEARANCE	0.971123	1.35182	3
POSITIVE REGULATION OF INTRACELLULAR PROTEIN TRANSPORT	-0.897583	-1.3515	1
NUCLEAR CHROMOSOME SEGREGATION	-1.35137	-1.18916	1
REGULATION OF VASOCONSTRICTION	-1.21331	1.35105	2
ENDODERM FORMATION	-1.0825	1.35069	2
REGULATION OF CARDIAC MUSCLE CELL ACTION POTENTIAL	1.35064	-0.684259	4
CEREBRAL CORTEX CELL MIGRATION	1.03302	1.35058	3
POSITIVE REGULATION OF MULTICELLULAR ORGANISM GROWTH	1.35057	-1.09415	4
EMBRYONIC CAMERA TYPE EYE DEVELOPMENT	-1.35027	0.882749	2
POSITIVE REGULATION OF PEPTIDYL LYSINE ACETYLATION	-1.34175	1.35025	2
RESPONSE TO KETONE	-0.92394	1.35017	2
POSITIVE REGULATION OF TRANSPORTER ACTIVITY	-1.35009	1.03579	2
CARDIAC CELL DEVELOPMENT	1.34996	-1.20866	4
POSITIVE REGULATION OF CELLULAR RESPONSE TO TRANSFORMING GROWTH FACTOR BETA STIMULUS	-1.34981	-0.589386	1
SPERMATID DIFFERENTIATION	-1.20562	-1.34925	1
REGULATION OF NECROTIC CELL DEATH	1.34906	-0.940492	4
PROTEIN HOMOOLIGOMERIZATION	-1.34899	0.740186	2
POSITIVE REGULATION OF LIPID METABOLIC PROCESS	-1.05104	1.3488	2
SKELETAL SYSTEM MORPHOGENESIS	-1.1992	1.34853	2
INSULIN RECEPTOR SIGNALING PATHWAY	-1.01911	-1.34843	1
REGULATION OF RESPONSE TO WOUNDING	-1.08003	1.34787	2
LEUKOCYTE DIFFERENTIATION	-0.846707	1.34751	2
C4 DICARBOXYLATE TRANSPORT	1.34749	-0.772191	4
LIMBIC SYSTEM DEVELOPMENT	1.06674	1.34712	3
AGING	-1.34672	-1.20335	1
NEGATIVE REGULATION OF TELOMERE MAINTENANCE	-1.34638	-0.423084	1
POSITIVE REGULATION OF DNA BINDING	-1.34507	0.985377	2
POLYSACCHARIDE CATABOLIC PROCESS	-1.34505	-0.858419	1
EAR MORPHOGENESIS	-1.16627	1.34429	2
REGULATION OF SYSTEMIC ARTERIAL BLOOD PRESSURE BY HORMONE	-1.0041	1.34421	2
FERTILIZATION	-1.34413	1.15299	2
T CELL DIFFERENTIATION	-0.801356	1.34401	2
COLUMNAR CUBOIDAL EPITHELIAL CELL DIFFERENTIATION	-1.10959	1.34351	2
REGULATION OF MESENCHYMAL CELL PROLIFERATION	-1.34295	-1.31296	1
REPLACEMENT OSSIFICATION	-1.19412	1.34277	2
POSITIVE REGULATION OF RESPONSE TO WOUNDING	-0.957293	1.34272	2
CELL MATRIX ADHESION	-0.841716	-1.34254	1
RRNA METABOLIC PROCESS	-1.3415	0.942749	2
REGULATION OF SODIUM ION TRANSMEMBRANE TRANSPORT	-1.34141	-0.58705	1
RETINOIC ACID RECEPTOR SIGNALING PATHWAY	-0.875054	1.3409	2
REGULATION OF HISTONE METHYLATION	-1.34081	0.690311	2
POSITIVE REGULATION OF PRODUCTION OF MOLECULAR MEDIATOR OF IMMUNE RESPONSE	-1.20426	1.34052	2
LEUKOCYTE TETHERING OR ROLLING	-0.708927	-1.34046	1
TRANSLESION SYNTHESIS	-1.34026	1.01071	2
MALE MEIOSIS I	-1.33965	-0.673938	1
RIBONUCLEOPROTEIN COMPLEX BIOGENESIS	-1.3393	-1.12013	1
NUCLEUS ORGANIZATION	-1.33895	-0.858119	1
REGULATION OF STEROID METABOLIC PROCESS	-1.09875	1.33869	2
NEGATIVE REGULATION OF CELL POPULATION PROLIFERATION	-1.11029	1.33865	2
PEPTIDYL THREONINE DEPHOSPHORYLATION	-1.33771	-1.01798	1
RESPONSE TO MONOSACCHARIDE	-1.33761	1.25068	2
DEVELOPMENTAL INDUCTION	-1.3376	1.10977	2
GLYCOSYLATION	-1.33717	1.20922	2
NEGATIVE REGULATION OF ATP METABOLIC PROCESS	1.15678	1.33638	3
CELLULAR RESPONSE TO ABIOTIC STIMULUS	-1.0979	1.33635	2
REGULATION OF LIPASE ACTIVITY	-1.02853	1.33543	2
REGULATION OF RESPONSE TO OXIDATIVE STRESS	-1.3351	1.28155	2
REGULATION OF SPROUTING ANGIOGENESIS	0.940419	-1.33501	4
PIGMENT BIOSYNTHETIC PROCESS	-1.17547	-1.33477	1
REGULATION OF T CELL DIFFERENTIATION	-0.667513	1.33411	2
NOREPINEPHRINE TRANSPORT	-0.843023	1.33408	2
POSITIVE REGULATION OF LAMELLIPODIUM ASSEMBLY	1.33383	0.502456	3
POSITIVE REGULATION OF CATABOLIC PROCESS	-1.33374	-0.850599	1
POSITIVE REGULATION OF LAMELLIPODIUM ORGANIZATION	1.33362	0.598949	3
RENAL TUBULE DEVELOPMENT	-0.895293	1.33355	2
REGULATION OF BRANCHING INVOLVED IN URETERIC BUD MORPHOGENESIS	1.33314	1.05964	3
POSITIVE REGULATION OF CELL CYCLE	-1.21295	1.33296	2
REGULATION OF SYNAPSE ASSEMBLY	1.33288	0.812766	3
CELL MORPHOGENESIS INVOLVED IN NEURON DIFFERENTIATION	-0.902937	1.33284	2
REGULATION OF MRNA 3 END PROCESSING	1.33228	-0.908681	4
RESPONSE TO RETINOIC ACID	-1.33217	1.2174	2
REGULATION OF NIK NF KAPPAB SIGNALING	1.33181	1.00813	3
POLYOL CATABOLIC PROCESS	-1.33179	-0.56195	1
CELLULAR RESPONSE TO LIGHT STIMULUS	-1.33174	1.16688	2
ADENYLATE CYCLASE ACTIVATING ADRENERGIC RECEPTOR SIGNALING PATHWAY	-0.903836	1.33146	2
OSTEOCLAST DIFFERENTIATION	-1.30639	1.33021	2
MATURATION OF SSU RRNA	-1.0429	-1.3298	1
MITOTIC DNA INTEGRITY CHECKPOINT	-1.3295	0.760752	2
RESPONSE TO INTERLEUKIN 12	-1.32926	-0.594739	1
TAXIS	-0.662048	1.32882	2
SMALL MOLECULE CATABOLIC PROCESS	-0.907559	-1.32845	1
REGULATION OF POSTSYNAPTIC MEMBRANE NEUROTRANSMITTER RECEPTOR LEVELS	-1.04997	-1.32825	1
LYMPH VESSEL DEVELOPMENT	-0.924542	-1.32797	1
O GLYCAN PROCESSING	-1.18156	1.32795	2
NEURON PROJECTION ARBORIZATION	1.32738	0.952468	3
NEGATIVE REGULATION OF NEURON DEATH	-1.1041	1.32675	2
REGULATION OF DNA BINDING	-1.32631	1.11063	2
REGULATION OF PEPTIDE SECRETION	-1.11895	1.32626	2
DOPAMINE RECEPTOR SIGNALING PATHWAY	-1.32604	-0.859179	1
EMBRYO IMPLANTATION	-1.32548	1.0563	2
MITOTIC G2 M TRANSITION CHECKPOINT	-1.32525	0.569656	2
POSITIVE REGULATION OF REGULATED SECRETORY PATHWAY	-1.20467	-1.32479	1
PROTEIN POLYUBIQUITINATION	-0.87574	-1.32465	1
HYDROGEN PEROXIDE METABOLIC PROCESS	1.10331	1.32421	3
SYNAPTIC VESICLE RECYCLING	-0.559302	-1.32421	1
POSITIVE REGULATION OF BIOMINERALIZATION	-1.0699	1.32416	2
MICROVILLUS ORGANIZATION	1.32414	0.461908	3
REGULATION OF PROTEIN EXIT FROM ENDOPLASMIC RETICULUM	1.15909	-1.32362	4
NEGATIVE REGULATION OF SYNAPTIC TRANSMISSION	-1.3236	-1.02853	1
DNA SYNTHESIS INVOLVED IN DNA REPAIR	-1.32317	0.848928	2
RESPONSE TO EPIDERMAL GROWTH FACTOR	-1.3227	-1.06984	1
REGULATION OF SENSORY PERCEPTION	-0.920963	1.32244	2
POSITIVE REGULATION OF STEROID METABOLIC PROCESS	-0.99303	1.32243	2
POSITIVE REGULATION OF SMOOTH MUSCLE CELL PROLIFERATION	1.32239	-1.07159	4
POSITIVE REGULATION OF MEIOTIC CELL CYCLE	-1.32188	0.930266	2
POSITIVE REGULATION OF INTERLEUKIN 1 PRODUCTION	-1.13535	1.32174	2
ERROR FREE TRANSLESION SYNTHESIS	-1.3217	-0.689848	1
REGULATION OF PRODUCTION OF MOLECULAR MEDIATOR OF IMMUNE RESPONSE	-1.16386	1.32129	2
BASE EXCISION REPAIR	-1.32122	-0.76584	1
REGULATION OF ANIMAL ORGAN MORPHOGENESIS	-0.745609	1.32115	2
COCHLEA DEVELOPMENT	-1.00702	-1.32112	1
RESPONSE TO IONIZING RADIATION	-1.32074	1.2534	2
LYMPH VESSEL MORPHOGENESIS	-1.2684	-1.32033	1
RIBOSE PHOSPHATE BIOSYNTHETIC PROCESS	1.09847	-1.32028	4
HISTONE DEACETYLATION	-1.00034	-1.3202	1
EPITHELIAL CELL PROLIFERATION	-1.14532	1.32014	2
MODULATION OF PROCESS OF OTHER ORGANISM	-1.32001	-0.785439	1
CONNECTIVE TISSUE DEVELOPMENT	-0.818032	1.31952	2
NEURON DEATH	-1.03258	1.31931	2
POSITIVE REGULATION OF CARBOHYDRATE METABOLIC PROCESS	-1.31908	-0.875228	1
VIRAL GENOME REPLICATION	-1.31878	-0.793183	1
KERATAN SULFATE BIOSYNTHETIC PROCESS	-0.553255	1.31876	2
PHOSPHATE ION TRANSPORT	-1.3187	1.10838	2
POSITIVE REGULATION OF CATION CHANNEL ACTIVITY	-1.25938	1.31866	2
CELLULAR PROCESS INVOLVED IN REPRODUCTION IN MULTICELLULAR ORGANISM	-1.31845	0.828453	2
CHROMOSOME SEGREGATION	-1.31752	-1.06996	1
NEGATIVE REGULATION OF CHROMATIN ORGANIZATION	-1.31749	1.14599	2
ASTROCYTE DEVELOPMENT	-0.569173	1.31688	2
RNA SPLICING	-1.31657	-0.955545	1
STEROL METABOLIC PROCESS	-1.25598	1.31622	2
NUCLEOBASE CONTAINING COMPOUND TRANSPORT	-1.31615	0.843931	2
HISTONE H3 K4 METHYLATION	-1.31611	0.670974	2
REGULATION OF PATTERN RECOGNITION RECEPTOR SIGNALING PATHWAY	-0.580656	1.31586	2
REGULATION OF CAMP MEDIATED SIGNALING	-1.31574	-0.837234	1
POSITIVE REGULATION OF JNK CASCADE	-1.27304	1.3152	2
NEGATIVE REGULATION OF DEPHOSPHORYLATION	-1.31497	0.828274	2
EPIDERMIS DEVELOPMENT	-0.813128	1.31489	2
PROTEIN LOCALIZATION TO CELL CELL JUNCTION	-1.31457	1.13127	2
LENS DEVELOPMENT IN CAMERA TYPE EYE	-1.31452	1.16868	2
TRNA TRANSPORT	-1.31432	-0.729433	1
LIPID LOCALIZATION	-0.785161	1.31422	2
INTERSTRAND CROSS LINK REPAIR	-1.31402	-0.649815	1
CELL CELL JUNCTION ORGANIZATION	-1.3134	0.694807	2
PROTEIN LOCALIZATION TO MITOCHONDRION	-1.31337	-0.881425	1
CELL KILLING	-1.01344	-1.31333	1
ANTIMICROBIAL HUMORAL RESPONSE	-1.31305	-1.23101	1
ENERGY RESERVE METABOLIC PROCESS	-0.765561	1.3129	2
RIBOSOMAL SMALL SUBUNIT BIOGENESIS	-1.31286	-1.17959	1
CELLULAR SENESCENCE	-1.26385	-1.31247	1
AXONAL FASCICULATION	-0.683948	-1.31191	1
REGULATION OF GLIAL CELL DIFFERENTIATION	1.31006	0.889992	3
NEGATIVE REGULATION OF DNA BIOSYNTHETIC PROCESS	-1.31004	1.10539	2
DNA REPAIR	-1.31001	-0.857859	1
ALPHA BETA T CELL DIFFERENTIATION	0.997438	1.30972	3
CATECHOL CONTAINING COMPOUND METABOLIC PROCESS	-0.870601	1.3097	2
POSITIVE REGULATION OF LEUKOCYTE PROLIFERATION	-0.764355	1.3097	2
DENDRITE DEVELOPMENT	-1.30961	-0.797041	1
NEGATIVE REGULATION OF REPRODUCTIVE PROCESS	-1.3096	0.901655	2
CELLULAR RESPONSE TO EXTRACELLULAR STIMULUS	-1.27855	1.30953	2
NEGATIVE REGULATION OF BIOMINERALIZATION	-1.30947	-1.229	1
NEGATIVE REGULATION OF PROTEIN LOCALIZATION TO NUCLEUS	-1.30938	-0.483508	1
POSITIVE REGULATION OF CELL MORPHOGENESIS INVOLVED IN DIFFERENTIATION	-0.980331	1.30927	2
RESPONSE TO ISCHEMIA	-1.30901	-0.904102	1
NEGATIVE REGULATION OF DNA TEMPLATED TRANSCRIPTION ELONGATION	-1.16208	1.30852	2
INSULIN SECRETION	-1.05117	1.30849	2
INOSITOL PHOSPHATE CATABOLIC PROCESS	-1.3084	0.522916	2
REGULATION OF NEUROGENESIS	-1.04879	1.30836	2
ACTION POTENTIAL	-1.30823	0.876167	2
POSITIVE REGULATION OF PROTEIN LOCALIZATION TO NUCLEUS	-1.17728	-1.30791	1
REGULATION OF MAST CELL ACTIVATION	1.30789	-0.72311	4
COAGULATION	-1.0602	1.30785	2
REACTIVE OXYGEN SPECIES BIOSYNTHETIC PROCESS	-1.01741	1.30754	2
ADRENERGIC RECEPTOR SIGNALING PATHWAY	-0.892562	1.30743	2
EPITHELIAL TO MESENCHYMAL TRANSITION	-1.08279	1.30732	2
RESPONSE TO LEUKEMIA INHIBITORY FACTOR	-0.795506	1.30719	2
TRANSMISSION OF NERVE IMPULSE	-0.814183	1.30664	2
NECROPTOTIC PROCESS	1.1004	1.30639	3
FATTY ACID BETA OXIDATION	-0.691286	-1.30623	1
INTERLEUKIN 1 PRODUCTION	-1.01206	1.30599	2
NEGATIVE REGULATION OF NEURON DIFFERENTIATION	-0.891898	1.30582	2
REGULATION OF PH	-1.30578	0.644864	2
BROWN FAT CELL DIFFERENTIATION	-0.85837	1.30578	2
REGULATION OF TUBE SIZE	-1.07705	1.30565	2
MEMBRANE LIPID BIOSYNTHETIC PROCESS	-1.30541	1.16228	2
MITOTIC SPINDLE ASSEMBLY	-1.30526	-0.86956	1
CHONDROITIN SULFATE PROTEOGLYCAN METABOLIC PROCESS	-0.885316	1.30511	2
REGULATION OF FILOPODIUM ASSEMBLY	-1.30462	-1.15372	1
ACTIVATION OF ADENYLATE CYCLASE ACTIVITY	-1.30422	1.19392	2
NEGATIVE REGULATION OF CELLULAR AMIDE METABOLIC PROCESS	-1.15812	-1.30342	1
NEUTROPHIL MIGRATION	-0.660377	-1.30311	1
DEOXYRIBONUCLEOTIDE METABOLIC PROCESS	-1.15803	1.30306	2
MUSCLE FIBER DEVELOPMENT	1.30288	-0.861884	4
REGULATION OF FATTY ACID TRANSPORT	1.1711	1.30281	3
RETROGRADE VESICLE MEDIATED TRANSPORT GOLGI TO ENDOPLASMIC RETICULUM	-1.30181	-1.18563	1
SNRNA METABOLIC PROCESS	0.672392	-1.30143	4
CENTRAL NERVOUS SYSTEM PROJECTION NEURON AXONOGENESIS	0.884073	1.30138	3
TRANSMEMBRANE RECEPTOR PROTEIN SERINE THREONINE KINASE SIGNALING PATHWAY	-0.99817	1.3013	2
NEGATIVE REGULATION OF MUSCLE CELL APOPTOTIC PROCESS	-0.917827	1.3009	2
REGULATION OF NON CANONICAL WNT SIGNALING PATHWAY	-1.30087	0.484426	2
ORGANIC CATION TRANSPORT	0.923685	1.29978	3
POSITIVE REGULATION OF BLOOD PRESSURE	-1.06327	1.29952	2
REGULATION OF PROTEIN ACETYLATION	-1.04237	1.29867	2
MAINTENANCE OF PROTEIN LOCATION IN CELL	-1.29039	-1.29858	1
NEGATIVE REGULATION OF OXIDATIVE STRESS INDUCED CELL DEATH	-1.29857	1.10274	2
POSITIVE REGULATION OF EPITHELIAL CELL MIGRATION	-0.812802	-1.2985	1
REGULATION OF CHROMATIN ORGANIZATION	-1.29835	-0.781771	1
INTRACELLULAR RECEPTOR SIGNALING PATHWAY	0.893096	1.29804	3
REGULATION OF SMOOTH MUSCLE CELL DIFFERENTIATION	-1.2055	1.298	2
CLEAVAGE INVOLVED IN RRNA PROCESSING	-1.29745	-0.989576	1
NEGATIVE REGULATION OF TYPE I INTERFERON PRODUCTION	-1.29701	1.08559	2
EMBRYONIC SKELETAL SYSTEM MORPHOGENESIS	-1.28206	1.29688	2
P38MAPK CASCADE	-1.29668	1.13505	2
REGULATION OF MACROAUTOPHAGY	-1.18221	-1.29658	1
MICROTUBULE CYTOSKELETON ORGANIZATION INVOLVED IN MITOSIS	-1.29649	-0.824774	1
POSITIVE REGULATION OF LOCOMOTION	-0.905438	-1.29583	1
CARBOHYDRATE TRANSPORT	-1.29513	0.605498	2
LUNG ALVEOLUS DEVELOPMENT	-1.25025	-1.29487	1
RESPONSE TO CARBOHYDRATE	-1.29477	1.28768	2
VASODILATION	1.29442	0.805083	3
POSITIVE REGULATION OF INTERFERON GAMMA PRODUCTION	-1.18277	1.29408	2
REGULATION OF MITOCHONDRIAL GENE EXPRESSION	-1.29394	-0.881145	1
LAMELLIPODIUM ORGANIZATION	1.29373	0.569361	3
NEPHRON EPITHELIUM DEVELOPMENT	-0.971233	1.29348	2
TELOMERE ORGANIZATION	-1.29254	-0.989565	1
REGULATION OF RECEPTOR MEDIATED ENDOCYTOSIS	-1.26327	-1.29224	1
RESPONSE TO VIRUS	-1.29223	0.997031	2
CELLULAR RESPONSE TO LIPID	-0.702697	1.29222	2
EPIDERMAL GROWTH FACTOR RECEPTOR SIGNALING PATHWAY	-0.861171	1.29199	2
COLLAGEN BIOSYNTHETIC PROCESS	-0.958873	1.29196	2
REGULATION OF HISTONE DEACETYLATION	-0.926899	-1.29159	1
REGENERATION	-0.971703	1.29153	2
MONONUCLEAR CELL DIFFERENTIATION	-0.77121	1.29143	2
REGULATION OF RESPONSE TO REACTIVE OXYGEN SPECIES	-1.29118	-0.762425	1
RESPONSE TO ESTRADIOL	-1.18524	1.29092	2
RIBONUCLEOPROTEIN COMPLEX SUBUNIT ORGANIZATION	-1.29085	-1.1242	1
ASTROCYTE DIFFERENTIATION	1.03799	1.29084	3
CELL DEATH IN RESPONSE TO OXIDATIVE STRESS	-1.24814	1.29063	2
POSITIVE REGULATION OF PEPTIDE SECRETION	-1.2904	1.20777	2
MATURATION OF SSU RRNA FROM TRICISTRONIC RRNA TRANSCRIPT SSU RRNA 5 8S RRNA LSU RRNA	1.10114	-1.29013	4
KERATAN SULFATE METABOLIC PROCESS	-0.708172	1.28998	2
NEGATIVE REGULATION OF CELLULAR RESPONSE TO INSULIN STIMULUS	-1.16573	-1.28937	1
FIBROBLAST PROLIFERATION	1.07839	1.28921	3
LIPOPROTEIN METABOLIC PROCESS	-0.928328	1.28897	2
REGULATION OF MUSCLE HYPERTROPHY	-0.922949	-1.28893	1
POSITIVE REGULATION OF UBIQUITIN PROTEIN TRANSFERASE ACTIVITY	1.04873	-1.28892	4
POSITIVE REGULATION OF PROTEIN ACETYLATION	-1.20526	1.28866	2
REGULATION OF MRNA SPLICING VIA SPLICEOSOME	-1.28835	0.973784	2
MACROPHAGE MIGRATION	1.28814	-0.669315	4
POSITIVE REGULATION OF CATION TRANSMEMBRANE TRANSPORT	-1.28754	1.09784	2
POSITIVE REGULATION OF AMINE TRANSPORT	-1.21086	1.28739	2
CELLULAR RESPONSE TO OXYGEN LEVELS	-1.28668	1.09204	2
CARBOHYDRATE HOMEOSTASIS	-1.28665	-1.11959	1
CALCIUM ION IMPORT	1.28648	1.1524	3
KERATINIZATION	1.15685	1.28624	3
BIOMINERALIZATION	-1.1783	1.28582	2
ERYTHROCYTE HOMEOSTASIS	-1.28563	-1.10687	1
SMOOTH MUSCLE TISSUE DEVELOPMENT	-1.28541	-0.91049	1
EMBRYONIC PATTERN SPECIFICATION	-0.796373	1.28488	2
T CELL DIFFERENTIATION IN THYMUS	-1.00452	1.28477	2
POSITIVE REGULATION OF CELL SUBSTRATE JUNCTION ORGANIZATION	-0.956146	-1.28464	1
NEGATIVE REGULATION OF WNT SIGNALING PATHWAY	-0.957016	1.28416	2
CELL DIFFERENTIATION INVOLVED IN KIDNEY DEVELOPMENT	0.684103	1.28413	3
MRNA TRANSPORT	-1.2841	-0.920335	1
PROTEIN LOCALIZATION TO PLASMA MEMBRANE	-1.0201	-1.28391	1
REGULATION OF HEMOPOIESIS	-0.941954	1.28362	2
HOMOTYPIC CELL CELL ADHESION	-1.26273	1.2834	2
LIPID EXPORT FROM CELL	1.28325	0.99174	3
NEGATIVE REGULATION OF LIPID METABOLIC PROCESS	-1.28324	-0.839487	1
HEART DEVELOPMENT	-0.955201	1.28315	2
REGULATION OF BODY FLUID LEVELS	-0.950852	1.283	2
POSITIVE REGULATION OF VASCULAR ASSOCIATED SMOOTH MUSCLE CELL PROLIFERATION	-0.942383	-1.28229	1
REGULATION OF PROTEIN AUTOPHOSPHORYLATION	-1.28219	0.880516	2
CHROMATIN ORGANIZATION INVOLVED IN REGULATION OF TRANSCRIPTION	-1.28208	0.755841	2
RNA PHOSPHODIESTER BOND HYDROLYSIS ENDONUCLEOLYTIC	-1.28189	1.01443	2
RNA SPLICING VIA TRANSESTERIFICATION REACTIONS	-1.28165	0.876975	2
RESPONSE TO NUTRIENT	-1.28159	1.026	2
T HELPER 1 TYPE IMMUNE RESPONSE	0.875728	1.2815	3
REGULATION OF CARTILAGE DEVELOPMENT	-0.951977	1.28137	2
POSITIVE REGULATION OF CELL ACTIVATION	-0.808968	1.28098	2
POTASSIUM ION TRANSPORT	-1.06399	1.2808	2
REGULATION OF MICROTUBULE BASED PROCESS	-1.28004	-0.966137	1
NADH METABOLIC PROCESS	-0.786061	-1.27999	1
POSITIVE REGULATION OF OSTEOBLAST DIFFERENTIATION	0.840258	-1.27952	4
POSITIVE REGULATION OF NF KAPPAB TRANSCRIPTION FACTOR ACTIVITY	-1.27872	0.999601	2
REGULATION OF BMP SIGNALING PATHWAY	-1.09833	1.2784	2
POSITIVE REGULATION OF INTERLEUKIN 10 PRODUCTION	-0.789829	1.27774	2
PIGMENTATION	-1.27743	-0.925407	1
PRODUCTION OF MOLECULAR MEDIATOR INVOLVED IN INFLAMMATORY RESPONSE	-1.27714	0.909853	2
ASSOCIATIVE LEARNING	-0.946295	1.27699	2
RESPONSE TO REACTIVE OXYGEN SPECIES	-1.20331	1.27695	2
REGULATION OF TELOMERE MAINTENANCE	-1.27687	-0.861458	1
CELLULAR RESPONSE TO CAMP	-0.866087	-1.27645	1
REGULATION OF SODIUM ION TRANSPORT	-1.27644	-0.621918	1
ISOPRENOID BIOSYNTHETIC PROCESS	-1.1802	1.27617	2
REGULATION OF TOLL LIKE RECEPTOR SIGNALING PATHWAY	-0.656256	1.27561	2
REGULATION OF NOTCH SIGNALING PATHWAY	1.24425	1.27537	3
REGULATION OF CELL CYCLE G2 M PHASE TRANSITION	-1.27523	-0.939626	1
CELLULAR RESPONSE TO RADIATION	-1.275	1.22709	2
MICROTUBULE NUCLEATION	-0.694955	-1.2748	1
MAINTENANCE OF PROTEIN LOCALIZATION IN ORGANELLE	-1.27135	-1.27479	1
TRANSITION METAL ION TRANSPORT	-1.1116	1.27464	2
POSITIVE REGULATION OF T CELL MIGRATION	-0.860432	-1.27433	1
NEGATIVE REGULATION OF PEPTIDE SECRETION	-1.27418	1.00339	2
MACROMOLECULE DEACYLATION	-1.27418	-0.885185	1
NEGATIVE REGULATION OF PEPTIDE HORMONE SECRETION	-1.07357	1.27406	2
POSITIVE REGULATION OF STRESS ACTIVATED PROTEIN KINASE SIGNALING CASCADE	-1.27386	1.19079	2
WATER HOMEOSTASIS	-1.27358	0.942957	2
LOCOMOTORY BEHAVIOR	-1.13354	1.27336	2
CELLULAR MODIFIED AMINO ACID CATABOLIC PROCESS	-1.2733	-1.25445	1
NUCLEOTIDE EXCISION REPAIR PREINCISION COMPLEX ASSEMBLY	-1.27326	0.88392	2
PEPTIDE CATABOLIC PROCESS	-1.27324	-0.964582	1
POSITIVE REGULATION OF MUSCLE CONTRACTION	-1.27298	-1.00608	1
REGULATION OF HEART CONTRACTION	1.27242	0.936893	3
NEGATIVE REGULATION OF PROTEIN BINDING	-1.27229	-0.623634	1
SPECIFICATION OF SYMMETRY	-0.686999	1.27177	2
REGULATION OF MEGAKARYOCYTE DIFFERENTIATION	-1.26284	-1.27159	1
OLFACTORY LOBE DEVELOPMENT	-0.877081	1.27159	2
POSITIVE REGULATION OF MRNA CATABOLIC PROCESS	-1.2711	0.782254	2
CILIARY BASAL BODY PLASMA MEMBRANE DOCKING	-1.27099	-0.868948	1
SISTER CHROMATID COHESION	1.27082	-0.611463	4
INTERLEUKIN 12 PRODUCTION	0.588143	1.27061	3
ENDOCARDIAL CUSHION DEVELOPMENT	-1.00237	1.27029	2
REGULATION OF ENDOCRINE PROCESS	1.20696	1.27022	3
REGULATION OF TUMOR NECROSIS FACTOR MEDIATED SIGNALING PATHWAY	-1.27011	-1.1957	1
SULFUR COMPOUND TRANSPORT	1.27007	-0.579265	4
NEGATIVE REGULATION OF CYTOKINE PRODUCTION	-0.821843	1.27004	2
REGULATION OF MEIOTIC CELL CYCLE	-1.26981	-0.828984	1
PERICARDIUM DEVELOPMENT	-1.26976	1.15954	2
MULTICELLULAR ORGANISM AGING	-1.26973	-0.80628	1
REGULATION OF PROTEIN IMPORT	1.26968	0.955266	3
NEGATIVE REGULATION OF CARBOHYDRATE METABOLIC PROCESS	1.26138	1.26963	3
MAMMARY GLAND EPITHELIAL CELL PROLIFERATION	-0.737017	1.26931	2
RESPONSE TO BMP	-1.0045	1.269	2
CELLULAR RESPONSE TO HEAT	-1.26894	0.574998	2
PROTEIN TARGETING TO MITOCHONDRION	-1.2688	-0.978423	1
RESPONSE TO SALT STRESS	-1.0727	-1.26864	1
EPITHELIAL CELL DEVELOPMENT	-1.09552	1.26852	2
ORGANELLE DISASSEMBLY	-0.660264	1.26834	2
PROTEIN LOCALIZATION TO CELL PERIPHERY	-1.00551	-1.26772	1
RESPONSE TO TRANSFORMING GROWTH FACTOR BETA	-1.2677	1.11315	2
PHYSIOLOGICAL CARDIAC MUSCLE HYPERTROPHY	1.26756	1.13025	3
OSTEOBLAST DIFFERENTIATION	-0.986784	1.26748	2
DENDRITIC SPINE DEVELOPMENT	-0.82495	-1.26741	1
SISTER CHROMATID SEGREGATION	-0.939107	-1.26718	1
HAIR CELL DIFFERENTIATION	1.26699	0.901069	3
NUCLEOSIDE CATABOLIC PROCESS	-1.26698	-1.19422	1
GLIOGENESIS	-0.936736	1.26681	2
ACUTE INFLAMMATORY RESPONSE	-1.26657	1.26092	2
REGULATION OF PROTEIN CATABOLIC PROCESS	-1.21664	-1.26653	1
POSITIVE REGULATION OF UBIQUITIN DEPENDENT PROTEIN CATABOLIC PROCESS	-1.05189	-1.26613	1
POSITIVE REGULATION OF ERYTHROCYTE DIFFERENTIATION	-1.26597	-1.10939	1
HISTONE H3 K9 METHYLATION	-1.26597	0.512985	2
REGULATION OF MYELINATION	1.26561	-1.18696	4
NEGATIVE REGULATION OF EPITHELIAL CELL PROLIFERATION	-1.26559	1.01378	2
CELL CELL ADHESION MEDIATED BY CADHERIN	-0.492264	-1.26552	1
SPLICEOSOMAL SNRNP ASSEMBLY	-1.26522	0.81258	2
EMBRYONIC SKELETAL SYSTEM DEVELOPMENT	-1.25037	1.26513	2
POSITIVE REGULATION OF REACTIVE OXYGEN SPECIES METABOLIC PROCESS	-1.08262	1.26475	2
POSITIVE REGULATION OF EPITHELIAL CELL DIFFERENTIATION	-1.26405	-0.943305	1
PROTEIN ADP RIBOSYLATION	-1.26402	-0.950057	1
POSITIVE REGULATION OF SYNAPTIC TRANSMISSION	-1.03963	-1.26382	1
SOMITE DEVELOPMENT	-1.11009	1.26355	2
NEGATIVE REGULATION OF GENE EXPRESSION EPIGENETIC	-1.2635	1.05817	2
LIPOSACCHARIDE METABOLIC PROCESS	-0.994417	-1.26345	1
GLIAL CELL PROLIFERATION	-1.2629	0.945868	2
POSITIVE REGULATION OF BINDING	-1.26285	1.07751	2
PHOSPHATIDYLCHOLINE METABOLIC PROCESS	-0.916524	1.26238	2
NUCLEOBASE CONTAINING SMALL MOLECULE INTERCONVERSION	-1.26232	-0.790611	1
REGULATION OF MACROPHAGE ACTIVATION	-0.718684	1.26211	2
NEUTRAL LIPID METABOLIC PROCESS	-0.998949	1.26191	2
CELLULAR KETONE METABOLIC PROCESS	-0.942292	-1.26138	1
CYTOKINE PRODUCTION INVOLVED IN INFLAMMATORY RESPONSE	-0.865732	1.26115	2
ENTRAINMENT OF CIRCADIAN CLOCK	-0.936785	1.26089	2
PROTEIN LOCALIZATION TO CHROMOSOME	-1.26087	1.2101	2
REGULATION OF HISTONE MODIFICATION	-1.26059	-0.861735	1
NEGATIVE REGULATION OF CANONICAL WNT SIGNALING PATHWAY	-0.799293	1.26029	2
PROTEIN COMPLEX OLIGOMERIZATION	-1.26005	0.679772	2
MODULATION OF PROCESS OF OTHER ORGANISM INVOLVED IN SYMBIOTIC INTERACTION	-1.25981	0.647141	2
COLUMNAR CUBOIDAL EPITHELIAL CELL DEVELOPMENT	-0.767905	1.25973	2
OXIDATIVE PHOSPHORYLATION	1.25947	-1.04073	4
G0 TO G1 TRANSITION	-1.25876	1.18793	2
DIGESTIVE TRACT MORPHOGENESIS	-0.985263	1.25783	2
REGULATION OF TELOMERE MAINTENANCE VIA TELOMERE LENGTHENING	-1.25752	-0.802671	1
REGULATION OF FATTY ACID BIOSYNTHETIC PROCESS	1.25731	1.14588	3
NEGATIVE REGULATION OF RECEPTOR MEDIATED ENDOCYTOSIS	-1.06556	-1.2573	1
PROGRAMMED NECROTIC CELL DEATH	1.06509	1.25676	3
SEMI LUNAR VALVE DEVELOPMENT	0.92315	1.25674	3
REGULATION OF STEM CELL PROLIFERATION	-1.21296	1.25625	2
SECRETION BY TISSUE	-0.963743	1.25618	2
CHONDROCYTE DIFFERENTIATION	-0.79058	1.25603	2
CHEMOKINE PRODUCTION	-1.25585	1.08624	2
INTRACELLULAR LIPID TRANSPORT	-1.25554	-0.8863	1
CARDIAC MUSCLE CELL ACTION POTENTIAL	-1.25536	0.785561	2
NUCLEOTIDE EXCISION REPAIR DNA DAMAGE RECOGNITION	-1.25504	0.793828	2
LUNG EPITHELIUM DEVELOPMENT	-1.14273	1.25494	2
POSITIVE REGULATION OF STEROL TRANSPORT	1.25487	1.06784	3
POSITIVE REGULATION OF CHROMOSOME ORGANIZATION	-1.25458	-0.984545	1
CELL CYCLE G2 M PHASE TRANSITION	-1.25429	-1.03596	1
REGULATION OF DNA TEMPLATED TRANSCRIPTION ELONGATION	-1.25418	1.22602	2
POSITIVE REGULATION OF REPRODUCTIVE PROCESS	-0.936811	-1.25367	1
REGULATION OF PHOSPHATIDYLINOSITOL 3 KINASE SIGNALING	-1.25355	1.16096	2
REGULATION OF ERYTHROCYTE DIFFERENTIATION	-1.25294	-0.744859	1
ERAD PATHWAY	-1.25278	-1.10449	1
NEGATIVE REGULATION OF PROTEOLYSIS	-1.25254	-1.14179	1
REGULATION OF TRANSPORTER ACTIVITY	-1.2525	-0.969243	1
MONOSACCHARIDE BIOSYNTHETIC PROCESS	-1.2524	0.760431	2
BONE REMODELING	-0.831764	1.25236	2
REGULATION OF PROTEIN DEACETYLATION	-1.25227	1.00259	2
RIBONUCLEOSIDE TRIPHOSPHATE METABOLIC PROCESS	1.25222	-1.22782	4
PROTEIN METHYLATION	-1.25158	1.08454	2
TYROSINE PHOSPHORYLATION OF STAT PROTEIN	1.22418	-1.25145	4
CARTILAGE DEVELOPMENT	-0.773448	1.25141	2
POSITIVE REGULATION OF I KAPPAB KINASE NF KAPPAB SIGNALING	-1.25097	-0.858919	1
REGULATION OF HORMONE LEVELS	-0.947272	1.25096	2
VACUOLAR ACIDIFICATION	0.617785	-1.25082	4
NEGATIVE REGULATION OF DNA BINDING	-1.25079	1.15876	2
NAD BIOSYNTHETIC PROCESS	-1.2506	-0.983276	1
RESPONSE TO LIGHT STIMULUS	-1.2503	0.72197	2
METHYLATION	-1.25013	0.903427	2
REGULATION OF VASCULAR ENDOTHELIAL GROWTH FACTOR RECEPTOR SIGNALING PATHWAY	-1.24986	1.02316	2
RIBONUCLEOSIDE METABOLIC PROCESS	-1.24964	-0.922469	1
GAMETE GENERATION	-1.24927	0.889576	2
ADENYLATE CYCLASE INHIBITING G PROTEIN COUPLED RECEPTOR SIGNALING PATHWAY	0.986529	1.24916	3
PHENOL CONTAINING COMPOUND BIOSYNTHETIC PROCESS	-0.828456	1.24914	2
VASCULAR ASSOCIATED SMOOTH MUSCLE CELL DIFFERENTIATION	-0.814917	-1.24894	1
REGULATION OF MICROTUBULE POLYMERIZATION	-1.24888	1.23724	2
SUBPALLIUM DEVELOPMENT	-0.714173	-1.24856	1
WALKING BEHAVIOR	-1.24837	-0.557867	1
AUTOPHAGOSOME MATURATION	-1.24837	-0.990599	1
ORGANIC ACID CATABOLIC PROCESS	-0.977755	-1.24822	1
T CELL HOMEOSTASIS	0.806364	1.24756	3
REGULATION OF PEPTIDE HORMONE SECRETION	-1.06309	1.24739	2
NEGATIVE REGULATION OF CELL CYCLE PHASE TRANSITION	-1.14074	-1.24665	1
SINGLE FERTILIZATION	-1.24665	1.08597	2
PROTEIN K63 LINKED UBIQUITINATION	-1.24652	-0.646165	1
EXCITATORY SYNAPSE ASSEMBLY	1.2465	0.716798	3
RETINA LAYER FORMATION	-1.24646	-0.954181	1
PROTEIN CONTAINING COMPLEX LOCALIZATION	-1.24581	-1.08056	1
REGULATION OF STRESS ACTIVATED PROTEIN KINASE SIGNALING CASCADE	-1.24558	0.921319	2
AMINO ACID ACTIVATION	-1.24551	-1.20474	1
LONG TERM SYNAPTIC POTENTIATION	-1.18223	-1.24504	1
NUCLEAR TRANSCRIBED MRNA POLY A TAIL SHORTENING	1.24464	-0.872444	4
AEROBIC RESPIRATION	-1.00817	-1.24436	1
POST TRANSLATIONAL PROTEIN MODIFICATION	-1.24432	-1.02146	1
CELLULAR RESPONSE TO KETONE	-0.884888	1.24427	2
MALE GAMETE GENERATION	-1.24386	0.822888	2
NCRNA METABOLIC PROCESS	-1.24372	-1.05901	1
INTERLEUKIN 4 PRODUCTION	-1.09498	1.24335	2
RESPONSE TO COLD	-1.24326	-1.16168	1
POSITIVE REGULATION OF GLUCOSE METABOLIC PROCESS	-1.24312	-0.733947	1
RESPONSE TO AMINE	-0.902473	1.24308	2
SMOOTH MUSCLE CELL DIFFERENTIATION	-1.24303	-1.10906	1
REGULATION OF EPITHELIAL TO MESENCHYMAL TRANSITION	-0.869232	1.24244	2
APOPTOTIC SIGNALING PATHWAY	-1.1399	1.24185	2
POSITIVE REGULATION OF PROTEASOMAL UBIQUITIN DEPENDENT PROTEIN CATABOLIC PROCESS	-1.17708	-1.2416	1
RECEPTOR METABOLIC PROCESS	-0.910459	1.24134	2
NUCLEOSIDE BISPHOSPHATE METABOLIC PROCESS	-0.942961	-1.24124	1
HETEROCHROMATIN ORGANIZATION	-1.24118	0.825588	2
REGULATION OF CYTOKINESIS	-1.08281	-1.24113	1
POSITIVE REGULATION OF CELL DEATH	-1.10465	1.24109	2
REGULATION OF MEMBRANE DEPOLARIZATION	-1.24057	0.98497	2
REGULATION OF CELL MORPHOGENESIS INVOLVED IN DIFFERENTIATION	-0.904744	1.24055	2
MATURATION OF 5 8S RRNA	-1.2404	-1.12226	1
CARDIAC MUSCLE CELL DIFFERENTIATION	1.21958	-1.23991	4
REGULATION OF CYSTEINE TYPE ENDOPEPTIDASE ACTIVITY	-0.864319	-1.23937	1
MRNA EXPORT FROM NUCLEUS	-1.23907	-0.863202	1
REGULATION OF NERVOUS SYSTEM DEVELOPMENT	-0.939029	1.23903	2
MORPHOGENESIS OF AN EPITHELIUM	-0.970704	1.23896	2
RECEPTOR CLUSTERING	1.23887	-0.711478	4
REGULATION OF MITOTIC CELL CYCLE	-1.23873	-0.938157	1
ACTIN FILAMENT BASED MOVEMENT	-0.848948	-1.23863	1
TELENCEPHALON GLIAL CELL MIGRATION	-0.710276	1.23831	2
POSITIVE REGULATION OF CELLULAR AMIDE METABOLIC PROCESS	-1.23782	0.806669	2
NEGATIVE REGULATION OF BLOOD PRESSURE	-1.01519	1.23743	2
METANEPHRIC NEPHRON DEVELOPMENT	0.997604	1.23738	3
DETOXIFICATION	1.23713	1.10099	3
NEGATIVE REGULATION OF TOLL LIKE RECEPTOR SIGNALING PATHWAY	-0.965493	1.2371	2
POSITIVE REGULATION OF RESPONSE TO DNA DAMAGE STIMULUS	-1.23688	0.71922	2
POSITIVE REGULATION OF CELL CYCLE PROCESS	-1.23685	1.23061	2
EMBRYONIC PLACENTA DEVELOPMENT	-1.23678	1.0122	2
METAL ION EXPORT	-1.23612	0.658591	2
MOLTING CYCLE	1.23551	-1.15227	4
HISTONE METHYLATION	-1.23541	1.22032	2
REGULATION OF SYNAPTIC TRANSMISSION GABAERGIC	1.04736	1.23532	3
POSITIVE REGULATION OF DNA REPAIR	-1.23532	-1.03275	1
FATTY ACID METABOLIC PROCESS	-0.995362	-1.23532	1
POSITIVE REGULATION OF CYTOKINESIS	-0.651439	-1.23498	1
MONOCARBOXYLIC ACID METABOLIC PROCESS	-0.899976	-1.23493	1
CELL DIVISION	-1.12069	-1.23486	1
RESPONSE TO GLUCAGON	-1.21985	-1.2348	1
PYRIMIDINE NUCLEOTIDE BIOSYNTHETIC PROCESS	-1.2346	0.706407	2
LEUKOCYTE MEDIATED CYTOTOXICITY	-0.677319	-1.23454	1
REGULATION OF CELLULAR PROTEIN LOCALIZATION	-1.07315	-1.23436	1
PHOSPHOLIPID METABOLIC PROCESS	-0.816153	1.23429	2
MESENCHYMAL TO EPITHELIAL TRANSITION	-0.579562	1.23369	2
GLYCOLYTIC PROCESS THROUGH FRUCTOSE 6 PHOSPHATE	-0.67434	-1.23368	1
MONOAMINE TRANSPORT	-0.990106	1.23357	2
RESPONSE TO FATTY ACID	-1.23357	-1.09601	1
PROTEASOMAL PROTEIN CATABOLIC PROCESS	-1.08076	-1.23346	1
NEGATIVE REGULATION OF ERBB SIGNALING PATHWAY	0.701183	1.23342	3
EMBRYONIC DIGESTIVE TRACT DEVELOPMENT	-1.00622	1.23338	2
ALPHA AMINO ACID CATABOLIC PROCESS	-1.23337	-1.16304	1
POSITIVE REGULATION OF CELLULAR CARBOHYDRATE METABOLIC PROCESS	-1.23314	-1.05148	1
POSITIVE REGULATION OF EXOCYTOSIS	-1.23312	-0.850112	1
POSITIVE REGULATION OF CELLULAR PROTEIN CATABOLIC PROCESS	-1.02893	-1.23292	1
NEGATIVE REGULATION OF CELL CYCLE	-1.23287	-0.967677	1
MRNA SPLICE SITE SELECTION	-1.23272	0.571055	2
PATHWAY RESTRICTED SMAD PROTEIN PHOSPHORYLATION	-0.92775	1.23262	2
CIRCADIAN RHYTHM	-1.23207	1.156	2
NCRNA PROCESSING	-1.23154	-1.10823	1
REGULATION OF EPITHELIAL CELL MIGRATION	1.052	-1.23151	4
MEMBRANE REPOLARIZATION DURING ACTION POTENTIAL	-1.23134	0.603773	2
NON RECOMBINATIONAL REPAIR	-1.23121	0.92681	2
POSITIVE REGULATION OF ISOTYPE SWITCHING	-1.23102	0.593713	2
IONOTROPIC GLUTAMATE RECEPTOR SIGNALING PATHWAY	1.23077	-0.845335	4
REGULATION OF CARDIAC MUSCLE CONTRACTION	1.23064	1.0562	3
PURINE CONTAINING COMPOUND BIOSYNTHETIC PROCESS	1.12123	-1.23057	4
REGULATION OF MORPHOGENESIS OF A BRANCHING STRUCTURE	1.061	1.23051	3
RESPONSE TO OXIDATIVE STRESS	-1.1716	1.2295	2
MITOTIC G1 S TRANSITION CHECKPOINT	-1.22944	0.923883	2
AUTOPHAGOSOME ORGANIZATION	-1.05734	-1.22931	1
MECHANORECEPTOR DIFFERENTIATION	1.22931	1.00578	3
PEPTIDYL LYSINE METHYLATION	-1.22907	1.19091	2
REGULATION OF CIRCADIAN RHYTHM	-1.22893	1.04264	2
REGULATION OF REACTIVE OXYGEN SPECIES BIOSYNTHETIC PROCESS	-1.01167	1.22892	2
REGULATION OF DEFENSE RESPONSE TO VIRUS	-1.22865	0.771219	2
GLIAL CELL DIFFERENTIATION	-0.74758	1.2285	2
PRESYNAPTIC ENDOCYTOSIS	-0.721078	-1.22849	1
CD8 POSITIVE ALPHA BETA T CELL ACTIVATION	1.22833	1.20343	3
PEPTIDYL LYSINE TRIMETHYLATION	-1.22762	-0.691819	1
REGULATION OF HAIR CYCLE	1.22689	0.755672	3
ACETYL COA METABOLIC PROCESS	-0.99913	-1.22687	1
NEGATIVE REGULATION OF ENDOCYTOSIS	-0.791355	-1.22626	1
PURINE NUCLEOSIDE METABOLIC PROCESS	-1.22625	-1.00205	1
MACROMOLECULE METHYLATION	-1.22619	0.842084	2
PEPTIDYL ARGININE MODIFICATION	-1.22583	-0.605542	1
CELL CELL ADHESION VIA PLASMA MEMBRANE ADHESION MOLECULES	-0.798258	1.22538	2
RECEPTOR CATABOLIC PROCESS	-0.452916	-1.22531	1
AMINE TRANSPORT	-0.949171	1.22516	2
POSITIVE REGULATION OF PHOSPHATIDYLINOSITOL 3 KINASE SIGNALING	-1.21684	1.22515	2
GLUCOSE 6 PHOSPHATE METABOLIC PROCESS	-0.48093	-1.22514	1
NEGATIVE REGULATION OF OSTEOBLAST DIFFERENTIATION	-0.764531	-1.22508	1
DEVELOPMENTAL PIGMENTATION	-1.22496	-0.877212	1
REGULATION OF VIRAL GENOME REPLICATION	-1.22444	0.760665	2
CAMP MEDIATED SIGNALING	-1.22442	-0.796311	1
ORGANIC HYDROXY COMPOUND BIOSYNTHETIC PROCESS	-1.07239	1.22442	2
EPITHELIAL CELL DIFFERENTIATION INVOLVED IN KIDNEY DEVELOPMENT	-0.559268	1.22367	2
PROTEIN ACTIVATION CASCADE	-0.971842	1.22346	2
HISTONE DEUBIQUITINATION	-1.22307	-1.17714	1
NEGATIVE REGULATION OF ENDOTHELIAL CELL PROLIFERATION	-0.762063	1.22274	2
REGULATION OF CELLULAR AMINE METABOLIC PROCESS	-1.22269	-1.09788	1
REGULATION OF SYNAPTIC VESICLE EXOCYTOSIS	1.22266	1.00724	3
RESPONSE TO ETHANOL	-1.22243	0.979927	2
INACTIVATION OF MAPK ACTIVITY	-1.13596	-1.22241	1
PHOSPHATIDYLSERINE METABOLIC PROCESS	0.659865	-1.2221	4
REGULATION OF HEART RATE BY CARDIAC CONDUCTION	-1.22185	0.571821	2
RESPONSE TO RADIATION	-1.22171	0.937197	2
PLATELET DEGRANULATION	-1.22134	-0.989961	1
REGULATION OF TRANSMEMBRANE TRANSPORT	-1.22088	-0.941097	1
POSITIVE REGULATION OF PEPTIDE HORMONE SECRETION	-1.22087	1.04881	2
TOLL LIKE RECEPTOR 4 SIGNALING PATHWAY	1.22081	1.12645	3
VASCULAR ENDOTHELIAL GROWTH FACTOR RECEPTOR SIGNALING PATHWAY	-1.00536	1.2207	2
REGULATION OF CHOLESTEROL EFFLUX	1.22068	1.16161	3
POSITIVE REGULATION OF ERK1 AND ERK2 CASCADE	-0.96459	1.22057	2
POSITIVE REGULATION OF VASCULATURE DEVELOPMENT	-1.07908	-1.22023	1
RESPONSE TO PEPTIDE HORMONE	-0.965357	-1.22003	1
POSITIVE REGULATION OF CHROMATIN ORGANIZATION	-1.21933	-1.03871	1
PROTEIN TARGETING TO LYSOSOME	-0.383376	-1.21906	1
ERBB SIGNALING PATHWAY	-1.04029	1.21887	2
POSITIVE REGULATION OF PROTEOLYSIS INVOLVED IN CELLULAR PROTEIN CATABOLIC PROCESS	-0.963905	-1.21884	1
MYELOID LEUKOCYTE MEDIATED IMMUNITY	-1.0463	-1.21804	1
POSITIVE REGULATION OF PATHWAY RESTRICTED SMAD PROTEIN PHOSPHORYLATION	0.904056	1.21791	3
CERAMIDE METABOLIC PROCESS	-1.21784	0.858197	2
MITOCHONDRIAL OUTER MEMBRANE PERMEABILIZATION	-1.00189	1.21768	2
LYMPHOCYTE COSTIMULATION	1.21747	0.650884	3
MUSCLE STRUCTURE DEVELOPMENT	-0.888953	1.21732	2
GOLGI ORGANIZATION	-1.21727	-0.946699	1
RESPONSE TO STARVATION	-1.21711	0.839723	2
MYELOID CELL HOMEOSTASIS	-1.21709	-1.05735	1
ENDOSOME TO LYSOSOME TRANSPORT	-0.655722	-1.21658	1
GLYCOPROTEIN BIOSYNTHETIC PROCESS	-1.19977	1.2164	2
OLIGODENDROCYTE DEVELOPMENT	1.21622	-0.743138	4
AORTIC VALVE MORPHOGENESIS	0.932837	1.21613	3
VASCULAR ASSOCIATED SMOOTH MUSCLE CONTRACTION	-1.21585	-1.15704	1
NUCLEOTIDE EXCISION REPAIR	-1.21543	-0.603057	1
PEPTIDYL CYSTEINE MODIFICATION	-1.21506	-0.712208	1
PHOTORECEPTOR CELL MAINTENANCE	-0.588411	-1.215	1
NEGATIVE REGULATION OF TRANSLATIONAL INITIATION	-1.21479	-0.912939	1
CELLULAR RESPONSE TO DRUG	-1.14351	1.21435	2
ZINC ION TRANSPORT	-0.973559	-1.21387	1
REGULATION OF AMYLOID PRECURSOR PROTEIN CATABOLIC PROCESS	1.21382	-0.965552	4
L ALPHA AMINO ACID TRANSMEMBRANE TRANSPORT	-1.21351	-0.616307	1
REGULATION OF CELL CYCLE PHASE TRANSITION	-1.21314	-1.13143	1
INTRINSIC APOPTOTIC SIGNALING PATHWAY IN RESPONSE TO OXIDATIVE STRESS	-1.213	0.655832	2
POSITIVE REGULATION OF NEURON APOPTOTIC PROCESS	0.841462	1.21298	3
RESPONSE TO PH	-1.21221	-0.961139	1
MUSCLE CELL PROLIFERATION	-0.778333	1.21175	2
ENDOCYTIC RECYCLING	-0.901983	-1.21174	1
REGULATION OF HORMONE SECRETION	-0.970909	1.21166	2
ENDOPLASMIC RETICULUM TO GOLGI VESICLE MEDIATED TRANSPORT	-1.21159	-0.903416	1
POSITIVE REGULATION OF TRANSLATIONAL INITIATION	-0.628355	-1.21104	1
POSITIVE REGULATION OF SMALL MOLECULE METABOLIC PROCESS	-1.2108	1.04208	2
FATTY ACID TRANSMEMBRANE TRANSPORT	-1.17485	-1.2108	1
MAMMARY GLAND DEVELOPMENT	-0.792393	-1.21034	1
POSITIVE REGULATION OF SMOOTH MUSCLE CELL MIGRATION	1.13844	-1.21007	4
NEGATIVE REGULATION OF CELL CYCLE G2 M PHASE TRANSITION	-1.20994	-0.751358	1
NEGATIVE REGULATION OF COAGULATION	-1.20992	0.639953	2
POSITIVE REGULATION OF PROTEIN KINASE ACTIVITY	-1.11618	1.20962	2
POSITIVE REGULATION OF HISTONE METHYLATION	-1.20958	-0.566525	1
POSITIVE REGULATION OF CELL DEVELOPMENT	-1.08328	1.20954	2
NEGATIVE REGULATION OF GENE SILENCING	-1.20941	-1	1
REGULATION OF JNK CASCADE	-1.13356	1.2092	2
REGULATION OF MORPHOGENESIS OF AN EPITHELIUM	1.04166	1.20916	3
ALCOHOL BIOSYNTHETIC PROCESS	-1.20903	1.20505	2
GLYCOSYL COMPOUND CATABOLIC PROCESS	-1.20882	-1.20665	1
REGULATION OF STEM CELL POPULATION MAINTENANCE	-1.20882	0.791416	2
INTEGRATED STRESS RESPONSE SIGNALING	-1.20838	1.13816	2
EPITHELIAL TUBE BRANCHING INVOLVED IN LUNG MORPHOGENESIS	-1.2083	1.14534	2
REGULATION OF THE FORCE OF HEART CONTRACTION	-0.651338	-1.20813	1
LUNG MORPHOGENESIS	-1.19581	1.20812	2
REGULATION OF RNA SPLICING	-1.20798	1.16034	2
HIPPOCAMPUS DEVELOPMENT	0.810575	1.20788	3
PEPTIDYL GLUTAMIC ACID MODIFICATION	-1.2072	-0.501659	1
REGULATION OF T CELL RECEPTOR SIGNALING PATHWAY	1.20707	-0.9172	4
L GLUTAMATE TRANSMEMBRANE TRANSPORT	-0.857096	-1.20702	1
REGULATION OF SYNAPTIC PLASTICITY	-1.20682	0.767803	2
BIOLOGICAL PROCESS INVOLVED IN INTERACTION WITH HOST	-1.20588	0.887597	2
THYMIC T CELL SELECTION	-1.09058	1.20514	2
MEMBRANE FUSION	-1.20513	-0.876142	1
JNK CASCADE	-1.20494	1.13082	2
REGULATION OF CATION CHANNEL ACTIVITY	-1.2049	0.756995	2
DNA CATABOLIC PROCESS	-1.20453	1.15234	2
RESPONSE TO VITAMIN	-1.20419	1.13788	2
GERM CELL DEVELOPMENT	-1.20408	-0.874078	1
REGULATION OF ACTIN FILAMENT BUNDLE ASSEMBLY	-0.920386	1.20379	2
POSITIVE REGULATION OF HEMOPOIESIS	-0.810839	1.20374	2
NUCLEOTIDE EXCISION REPAIR DNA INCISION	-1.20317	0.838217	2
INTERFERON BETA PRODUCTION	-1.20295	1.1647	2
REGULATION OF OSTEOBLAST DIFFERENTIATION	-0.796529	-1.20255	1
POSITIVE REGULATION OF ENDOCYTOSIS	-0.752626	-1.20244	1
POSITIVE REGULATION OF FAT CELL DIFFERENTIATION	-0.886354	1.20238	2
MACROAUTOPHAGY	-1.18373	-1.20218	1
POSITIVE REGULATION OF PHAGOCYTOSIS	-0.962106	-1.20202	1
GLYCOPROTEIN METABOLIC PROCESS	-1.09464	1.20199	2
TYPE I INTERFERON PRODUCTION	-1.20189	1.18826	2
CELLULAR RESPONSE TO MOLECULE OF BACTERIAL ORIGIN	-0.644877	1.20131	2
REGULATION OF LONG TERM NEURONAL SYNAPTIC PLASTICITY	1.20097	0.623772	3
CANONICAL WNT SIGNALING PATHWAY	-0.858164	1.20031	2
LYSOSOME LOCALIZATION	-0.609532	-1.20013	1
INTRA GOLGI VESICLE MEDIATED TRANSPORT	-1.20011	-0.864999	1
SOMATIC STEM CELL POPULATION MAINTENANCE	-0.797471	1.19947	2
POSITIVE REGULATION OF RELEASE OF SEQUESTERED CALCIUM ION INTO CYTOSOL	-1.19863	0.858305	2
STEM CELL DIFFERENTIATION	-0.883908	1.19856	2
AMINE CATABOLIC PROCESS	-1.19846	-1.03835	1
REGULATION OF PHAGOCYTOSIS	-1.02018	-1.19827	1
NUCLEAR TRANSCRIBED MRNA CATABOLIC PROCESS EXONUCLEOLYTIC	-0.983597	-1.19826	1
REGULATION OF PHOSPHOLIPID METABOLIC PROCESS	1.19814	0.857925	3
SIGNAL RELEASE	-0.813402	1.19774	2
REGULATION OF HEMATOPOIETIC PROGENITOR CELL DIFFERENTIATION	1.19743	-0.726357	4
DNA REPLICATION	-1.19742	1.02518	2
TISSUE REMODELING	-0.994662	1.19655	2
RHYTHMIC PROCESS	-1.10577	1.1963	2
MYOBLAST FUSION	-1.19587	1.03502	2
SERINE FAMILY AMINO ACID METABOLIC PROCESS	1.19546	-0.83619	4
REGULATION OF DNA TEMPLATED TRANSCRIPTION IN RESPONSE TO STRESS	-1.19534	0.983673	2
POSITIVE REGULATION OF MACROAUTOPHAGY	-1.19524	-1.09425	1
GLIAL CELL MIGRATION	-1.19505	1.14383	2
STRIATED MUSCLE ADAPTATION	1.07241	-1.19491	4
GOLGI VESICLE TRANSPORT	-1.17127	-1.19442	1
MATURATION OF 5 8S RRNA FROM TRICISTRONIC RRNA TRANSCRIPT SSU RRNA 5 8S RRNA LSU RRNA	-1.19436	-0.910384	1
RECEPTOR INTERNALIZATION	-1.19429	-0.91653	1
EPIBOLY	-1.19427	0.70909	2
CELL RECOGNITION	-1.19385	0.899629	2
CELL MATURATION	0.978034	1.19377	3
VIRAL LIFE CYCLE	-1.19372	-0.766317	1
NEGATIVE REGULATION OF OSSIFICATION	-1.19349	1.05177	2
EMBRYONIC PLACENTA MORPHOGENESIS	-1.19313	-0.844637	1
INTERLEUKIN 6 PRODUCTION	-0.95915	1.19284	2
POSITIVE REGULATION OF APOPTOTIC SIGNALING PATHWAY	-0.858585	-1.19279	1
NUCLEOTIDE EXCISION REPAIR DNA DUPLEX UNWINDING	-1.19236	0.893933	2
NEGATIVE REGULATION OF CHEMOTAXIS	-0.656541	1.19204	2
STRIATED MUSCLE CELL DEVELOPMENT	1.19188	0.929339	3
POSITIVE REGULATION OF TRANSLATION	-1.19146	-0.861474	1
NUCLEOSIDE PHOSPHATE BIOSYNTHETIC PROCESS	-0.79647	-1.19141	1
POSITIVE REGULATION OF GROWTH	-0.736602	1.19058	2
NUCLEIC ACID PHOSPHODIESTER BOND HYDROLYSIS	-1.19051	0.822776	2
NEGATIVE REGULATION OF SMOOTHENED SIGNALING PATHWAY	-1.19015	0.812109	2
MAINTENANCE OF BLOOD BRAIN BARRIER	-1.18932	-0.945111	1
FILOPODIUM ASSEMBLY	-1.18923	-0.992734	1
POSITIVE REGULATION OF CHEMOTAXIS	1.18908	-1.04722	4
POSITIVE REGULATION OF PROTEIN CATABOLIC PROCESS	-1.18877	-1.03487	1
INOSITOL LIPID MEDIATED SIGNALING	-1.07192	1.1885	2
POSITIVE REGULATION OF EXTRINSIC APOPTOTIC SIGNALING PATHWAY	1.09693	1.18834	3
BRANCHING INVOLVED IN BLOOD VESSEL MORPHOGENESIS	-1.18804	1.04582	2
REGULATION OF SYSTEMIC ARTERIAL BLOOD PRESSURE	-0.966837	1.18785	2
POSITIVE REGULATION OF ADAPTIVE IMMUNE RESPONSE	-1.18714	-0.8023	1
POSITIVE REGULATION OF CYTOSOLIC CALCIUM ION CONCENTRATION INVOLVED IN PHOSPHOLIPASE C ACTIVATING G PROTEIN COUPLED SIGNALING PATHWAY	-0.736903	-1.18649	1
PLACENTA BLOOD VESSEL DEVELOPMENT	-1.1864	-1.01333	1
PHOSPHOLIPID BIOSYNTHETIC PROCESS	-0.776363	1.18629	2
NEGATIVE REGULATION OF CELL JUNCTION ASSEMBLY	-1.18614	0.506073	2
REGULATION OF MEMBRANE REPOLARIZATION	-1.18543	0.857347	2
DETECTION OF STIMULUS	-1.04134	1.18539	2
MRNA PROCESSING	-1.18513	-0.91195	1
REGULATION OF BIOMINERALIZATION	-1.18464	1.09144	2
NEGATIVE REGULATION OF HISTONE MODIFICATION	-1.18411	0.987421	2
VACUOLE ORGANIZATION	-0.919954	-1.18333	1
POSITIVE REGULATION OF DNA BINDING TRANSCRIPTION FACTOR ACTIVITY	-1.18333	0.954139	2
ENERGY HOMEOSTASIS	-0.931683	1.18285	2
REGULATION OF MITOCHONDRIAL OUTER MEMBRANE PERMEABILIZATION INVOLVED IN APOPTOTIC SIGNALING PATHWAY	-1.07047	1.18236	2
VIRION ASSEMBLY	-1.18203	-1.02648	1
RESPONSE TO OXYGEN LEVELS	-1.18203	1.05789	2
POSITIVE REGULATION OF TRANSMEMBRANE RECEPTOR PROTEIN SERINE THREONINE KINASE SIGNALING PATHWAY	-1.18148	1.08448	2
REGULATION OF BINDING	-1.18148	0.974461	2
APICAL JUNCTION ASSEMBLY	-1.18094	0.761421	2
POSITIVE REGULATION OF SECRETION	-1.12752	1.18087	2
REGULATION OF INTRINSIC APOPTOTIC SIGNALING PATHWAY IN RESPONSE TO DNA DAMAGE	-1.1808	1.08972	2
MEMBRANE PROTEIN ECTODOMAIN PROTEOLYSIS	-0.976715	1.18042	2
REGULATION OF SECRETION	-0.932668	1.18032	2
NEGATIVE REGULATION OF MITOTIC CELL CYCLE	-1.08501	-1.18028	1
RNA METHYLATION	-1.18014	1.01604	2
REGULATION OF LAMELLIPODIUM ORGANIZATION	1.18012	0.784323	3
NEGATIVE REGULATION OF NEURON APOPTOTIC PROCESS	-1.11341	1.17909	2
MODULATION OF EXCITATORY POSTSYNAPTIC POTENTIAL	-1.17888	0.699847	2
IMPORT INTO NUCLEUS	1.17811	1.03453	3
POSITIVE REGULATION OF DEVELOPMENTAL GROWTH	-0.651029	1.17811	2
COPII COATED VESICLE BUDDING	-1.17796	0.625509	2
RESPONSE TO TEMPERATURE STIMULUS	-1.17727	-0.934313	1
CARDIAC MUSCLE CELL MEMBRANE REPOLARIZATION	-1.17723	0.629571	2
ENDOTHELIAL CELL CHEMOTAXIS	0.653947	-1.17716	4
NUCLEOSIDE TRIPHOSPHATE METABOLIC PROCESS	1.17714	-0.806646	4
REGULATION OF VESICLE MEDIATED TRANSPORT	-1.04908	-1.17702	1
POSITIVE REGULATION OF PROTEIN MATURATION	1.03528	1.177	3
NEGATIVE REGULATION OF CARDIAC MUSCLE TISSUE GROWTH	-0.867367	1.17649	2
NEGATIVE REGULATION OF APOPTOTIC SIGNALING PATHWAY	-1.03961	1.17621	2
NIK NF KAPPAB SIGNALING	1.17596	-0.902458	4
POSITIVE REGULATION OF ANTIGEN RECEPTOR MEDIATED SIGNALING PATHWAY	1.17546	-1.17026	4
SYNAPSE MATURATION	-1.17538	0.933431	2
POSITIVE REGULATION OF SIGNAL TRANSDUCTION BY P53 CLASS MEDIATOR	-0.977804	1.17501	2
REGULATION OF SYSTEMIC ARTERIAL BLOOD PRESSURE MEDIATED BY A CHEMICAL SIGNAL	-1.09189	1.17493	2
REGULATION OF MEMBRANE PERMEABILITY	-1.17489	1.05208	2
LIPID HOMEOSTASIS	-1.06919	1.17488	2
REGULATION OF SYSTEM PROCESS	-0.840052	1.17487	2
TRANSFORMING GROWTH FACTOR BETA RECEPTOR SIGNALING PATHWAY	-1.17481	0.999838	2
REGULATION OF LIPID BIOSYNTHETIC PROCESS	-1.12249	1.17456	2
POSITIVE REGULATION OF MAPK CASCADE	-1.11493	1.17454	2
IN UTERO EMBRYONIC DEVELOPMENT	-1.17452	0.904301	2
REGULATION OF WNT SIGNALING PATHWAY	-0.975046	1.17424	2
REGULATION OF POLYSACCHARIDE METABOLIC PROCESS	-0.845071	1.17422	2
TELOMERE MAINTENANCE VIA TELOMERE LENGTHENING	-1.17421	-0.90409	1
LATE ENDOSOME TO VACUOLE TRANSPORT	1.17418	0.618645	3
NEGATIVE REGULATION OF CATION CHANNEL ACTIVITY	-1.1741	-0.603345	1
NEURAL TUBE DEVELOPMENT	-0.892331	1.17373	2
TOLL LIKE RECEPTOR SIGNALING PATHWAY	-0.608929	1.17326	2
ANION HOMEOSTASIS	1.17318	0.935361	3
RESPONSE TO MOLECULE OF BACTERIAL ORIGIN	-0.78695	1.17312	2
PURINE NUCLEOSIDE MONOPHOSPHATE METABOLIC PROCESS	1.17284	0.891328	3
SKIN EPIDERMIS DEVELOPMENT	0.99891	-1.17277	4
TOXIN TRANSPORT	-0.824814	-1.17272	1
PROTEIN LOCALIZATION TO CELL SURFACE	-0.58737	-1.17262	1
NECROTIC CELL DEATH	0.979622	1.17232	3
FATTY ACID CATABOLIC PROCESS	-0.627771	-1.17207	1
ANATOMICAL STRUCTURE HOMEOSTASIS	-1.17193	0.763468	2
ANIMAL ORGAN REGENERATION	-1.17192	1.00734	2
REGULATION OF ENDOCYTOSIS	-1.00283	-1.17187	1
REGULATION OF RECEPTOR INTERNALIZATION	-1.13448	-1.17135	1
POSITIVE REGULATION OF PROTEIN SERINE THREONINE KINASE ACTIVITY	-1.06061	1.17073	2
SYNAPTIC TRANSMISSION GLUTAMATERGIC	0.764403	1.17053	3
NEURON APOPTOTIC PROCESS	-1.00066	1.17022	2
STRESS ACTIVATED PROTEIN KINASE SIGNALING CASCADE	-1.17015	0.919836	2
PROSTATE GLAND MORPHOGENESIS	-0.799937	1.16972	2
NEUROBLAST PROLIFERATION	-0.729372	1.16968	2
SKELETAL MUSCLE CONTRACTION	-1.16962	0.719726	2
PROXIMAL DISTAL PATTERN FORMATION	1.01782	1.16894	3
REGULATION OF VASCULAR ASSOCIATED SMOOTH MUSCLE CELL PROLIFERATION	-1.1688	-1.12563	1
CELLULAR RESPONSE TO GLUCOSE STARVATION	-1.16826	1.0795	2
STRIATED MUSCLE CELL APOPTOTIC PROCESS	-0.728249	1.16807	2
PROTEIN K48 LINKED UBIQUITINATION	-0.785302	-1.16788	1
PROTEIN LOCALIZATION TO SYNAPSE	-0.553516	-1.16775	1
POSITIVE REGULATION OF PROTEIN MODIFICATION BY SMALL PROTEIN CONJUGATION OR REMOVAL	1.13832	-1.16685	4
RESPONSE TO EXTRACELLULAR STIMULUS	-1.1662	1.08038	2
CARBOHYDRATE DERIVATIVE TRANSPORT	0.894871	1.16602	3
GLUCOSE IMPORT	-1.16583	-0.611923	1
NUCLEOBASE CONTAINING SMALL MOLECULE CATABOLIC PROCESS	-1.16567	-1.07595	1
REGULATION OF RAS PROTEIN SIGNAL TRANSDUCTION	-1.16545	-0.868103	1
NEGATIVE REGULATION OF SECRETION	-1.05881	1.16471	2
ACIDIC AMINO ACID TRANSPORT	1.16435	0.910515	3
MONOCARBOXYLIC ACID CATABOLIC PROCESS	-0.756076	-1.16417	1
SOMATIC RECOMBINATION OF IMMUNOGLOBULIN GENE SEGMENTS	-1.16407	1.0612	2
RESPONSE TO HEAT	-1.16392	-0.991718	1
REGULATION OF LYMPHOCYTE ACTIVATION	-0.811137	1.16366	2
SPINDLE ASSEMBLY	-1.16297	-0.829332	1
AMYLOID BETA METABOLIC PROCESS	-0.994958	1.16277	2
SKIN DEVELOPMENT	-0.951121	1.16271	2
MYELOID LEUKOCYTE MIGRATION	0.904639	-1.1626	4
GENE SILENCING	-1.16216	-0.654271	1
POSITIVE REGULATION OF FIBROBLAST PROLIFERATION	-0.646776	1.16207	2
PROTEIN LOCALIZATION TO CHROMATIN	-1.16185	1.04027	2
CHROMATIN REMODELING	-1.1618	-1.10054	1
TRANSCRIPTION ELONGATION FROM RNA POLYMERASE I PROMOTER	-0.686756	-1.16167	1
ACTIVATION OF CYSTEINE TYPE ENDOPEPTIDASE ACTIVITY INVOLVED IN APOPTOTIC PROCESS	-1.02589	-1.16158	1
REGULATION OF STEROID BIOSYNTHETIC PROCESS	-1.16157	1	2
PROTEIN STABILIZATION	-1.16132	-0.921077	1
SPERM MOTILITY	-0.878334	-1.16052	1
POSITIVE REGULATION OF TYPE I INTERFERON PRODUCTION	-1.00991	1.16047	2
TRNA METHYLATION	-1.16017	1.09548	2
REGULATION OF MUSCLE ADAPTATION	0.92291	-1.16015	4
B CELL ACTIVATION INVOLVED IN IMMUNE RESPONSE	-1.05513	1.1601	2
REGULATION OF STEM CELL DIFFERENTIATION	1.15991	-0.934946	4
METANEPHRIC NEPHRON MORPHOGENESIS	1.1599	0.831459	3
NEGATIVE REGULATION OF INTRACELLULAR SIGNAL TRANSDUCTION	-1.15987	0.991879	2
REGULATION OF MULTICELLULAR ORGANISM GROWTH	0.95893	-1.15982	4
POST EMBRYONIC DEVELOPMENT	-1.00426	1.15978	2
REGULATION OF DOUBLE STRAND BREAK REPAIR VIA NONHOMOLOGOUS END JOINING	-0.980253	-1.15978	1
NEGATIVE REGULATION OF INTRINSIC APOPTOTIC SIGNALING PATHWAY IN RESPONSE TO DNA DAMAGE	-1.09754	1.1589	2
OVULATION CYCLE PROCESS	1.04733	1.15888	3
GUANOSINE CONTAINING COMPOUND METABOLIC PROCESS	-1.15879	-0.9443	1
REGULATION OF B CELL PROLIFERATION	0.931144	1.15879	3
RESPONSE TO TOPOLOGICALLY INCORRECT PROTEIN	-1.15823	-0.961055	1
REGULATION OF ACTOMYOSIN STRUCTURE ORGANIZATION	-0.980715	1.15783	2
LACTATION	-0.759951	-1.15738	1
EXPORT ACROSS PLASMA MEMBRANE	-1.15728	1.01213	2
REGULATION OF MITOCHONDRIAL MEMBRANE PERMEABILITY	-1.15724	1.05407	2
METANEPHRIC TUBULE DEVELOPMENT	1.15668	-1.09669	4
POSITIVE REGULATION OF CELL CYCLE ARREST	-1.15655	1.10392	2
EPITHELIAL CELL MORPHOGENESIS	-1.15233	1.15651	2
CELLULAR RESPONSE TO STEROID HORMONE STIMULUS	1.02186	1.1562	3
REGULATION OF PROTEIN LOCALIZATION TO CELL SURFACE	-0.760524	-1.15616	1
PROTEIN LOCALIZATION TO VACUOLE	0.535102	-1.15602	4
REGULATION OF TRANSCRIPTION INVOLVED IN G1 S TRANSITION OF MITOTIC CELL CYCLE	-0.641504	1.15527	2
POSITIVE REGULATION OF CELL MATRIX ADHESION	-0.712806	-1.15518	1
REGULATION OF NEUTROPHIL CHEMOTAXIS	0.876969	-1.15496	4
DNA DEALKYLATION	-1.1548	0.736225	2
NEGATIVE REGULATION OF ESTABLISHMENT OF PROTEIN LOCALIZATION	-1.15461	0.742289	2
ENDOPLASMIC RETICULUM UNFOLDED PROTEIN RESPONSE	-1.15448	0.931643	2
REGULATION OF PEPTIDASE ACTIVITY	-0.909611	-1.15387	1
CELLULAR RESPONSE TO IONIZING RADIATION	-1.09016	1.15327	2
POSITIVE REGULATION OF STRIATED MUSCLE CELL DIFFERENTIATION	-0.93418	1.15311	2
HORMONE MEDIATED SIGNALING PATHWAY	-0.627943	-1.15303	1
OOCYTE DIFFERENTIATION	-0.623669	1.15291	2
REGULATION OF GLIAL CELL PROLIFERATION	-0.912831	-1.15288	1
CYTOKINE PRODUCTION	-0.839945	1.15271	2
NUCLEOBASE METABOLIC PROCESS	-1.09359	-1.15224	1
L AMINO ACID TRANSPORT	-1.15222	0.554706	2
POSITIVE REGULATION OF MUSCLE CELL DIFFERENTIATION	-1.04426	1.15136	2
POSITIVE REGULATION OF TUMOR NECROSIS FACTOR SUPERFAMILY CYTOKINE PRODUCTION	-0.780652	1.1512	2
REGULATION OF ACTION POTENTIAL	-1.15118	-0.637049	1
ESTABLISHMENT OF CELL POLARITY	-1.15107	-0.858211	1
LABYRINTHINE LAYER DEVELOPMENT	-1.15098	0.858817	2
AMYLOID PRECURSOR PROTEIN CATABOLIC PROCESS	0.802774	1.15003	3
REGULATION OF BLOOD PRESSURE	-0.890045	1.14893	2
SPLICEOSOMAL COMPLEX ASSEMBLY	-1.14823	-0.888365	1
NEGATIVE REGULATION OF GLIOGENESIS	1.1434	-1.14795	4
REGULATION OF RELEASE OF CYTOCHROME C FROM MITOCHONDRIA	1.14763	-0.786157	4
NEGATIVE REGULATION OF CELL CYCLE G1 S PHASE TRANSITION	-1.06442	1.14757	2
POSITIVE REGULATION OF HEART RATE	0.858644	-1.14723	4
EXTRACELLULAR VESICLE BIOGENESIS	-0.890446	1.14697	2
NEURAL TUBE FORMATION	-1.14656	-0.863791	1
HEMATOPOIETIC PROGENITOR CELL DIFFERENTIATION	-0.922956	1.14641	2
TISSUE HOMEOSTASIS	-1.14632	0.922009	2
POSITIVE REGULATION OF GLIOGENESIS	1.14604	0.853651	3
MULTI MULTICELLULAR ORGANISM PROCESS	-1.08408	-1.14579	1
CARBOHYDRATE DERIVATIVE CATABOLIC PROCESS	-1.14576	1.06552	2
POSITIVE REGULATION OF MICROTUBULE POLYMERIZATION OR DEPOLYMERIZATION	-1.14552	-0.71811	1
REGULATION OF BLOOD CIRCULATION	-0.751699	1.14535	2
MULTI ORGANISM LOCALIZATION	-1.14534	-0.834282	1
RESPONSE TO TUMOR NECROSIS FACTOR	-0.692555	-1.14502	1
POSITIVE REGULATION OF IMMUNE EFFECTOR PROCESS	-1.14498	0.993635	2
SCF DEPENDENT PROTEASOMAL UBIQUITIN DEPENDENT PROTEIN CATABOLIC PROCESS	-1.14401	-0.845683	1
RESPIRATORY SYSTEM DEVELOPMENT	-1.04289	1.14393	2
AROMATIC AMINO ACID FAMILY METABOLIC PROCESS	-0.933613	-1.14362	1
SARCOMERE ORGANIZATION	-0.872541	1.14343	2
REGULATION OF CELLULAR PROTEIN CATABOLIC PROCESS	-1.14339	-0.936614	1
NEGATIVE REGULATION OF IMMUNE EFFECTOR PROCESS	-1.14291	-0.683766	1
REGULATION OF IMMUNE EFFECTOR PROCESS	-1.14288	0.889357	2
CAMERA TYPE EYE MORPHOGENESIS	-1.14286	-0.993827	1
REGULATION OF MYELOID CELL DIFFERENTIATION	-0.972098	1.14235	2
MEMBRANE LIPID METABOLIC PROCESS	-1.14232	-1.04026	1
ENDOTHELIAL CELL PROLIFERATION	-1.14229	1.13831	2
ALPHA BETA T CELL ACTIVATION	-0.716421	1.14223	2
REGULATION OF PROTEOLYSIS	-1.0306	-1.14219	1
MUSCLE TISSUE DEVELOPMENT	-0.744482	1.14218	2
POSITIVE REGULATION OF CELL CYCLE G2 M PHASE TRANSITION	-1.14213	-0.846243	1
LEUKOCYTE CHEMOTAXIS	1.03491	-1.14204	4
POSITIVE REGULATION OF IMMUNOGLOBULIN PRODUCTION	-1.14159	0.868016	2
MODIFICATION DEPENDENT MACROMOLECULE CATABOLIC PROCESS	-1.07874	-1.14158	1
PHOSPHATIDYLINOSITOL 3 KINASE SIGNALING	-1.12883	1.14151	2
REGULATION OF CARDIAC CONDUCTION	1.14149	0.889052	3
HISTONE H2A UBIQUITINATION	-1.14143	-0.953021	1
B CELL HOMEOSTASIS	1.14135	0.965057	3
MRNA 3 END PROCESSING	-1.14125	-0.961242	1
EMBRYO DEVELOPMENT ENDING IN BIRTH OR EGG HATCHING	-1.14046	1.117	2
MEMBRANE DEPOLARIZATION	-1.13967	0.93637	2
SOMATIC DIVERSIFICATION OF IMMUNOGLOBULINS	-1.12748	1.1386	2
ORGANIC HYDROXY COMPOUND METABOLIC PROCESS	-1.09251	1.1386	2
MEGAKARYOCYTE DIFFERENTIATION	-1.13852	-1.10431	1
REGULATION OF STRIATED MUSCLE CONTRACTION	1.13799	1.10446	3
ALTERNATIVE MRNA SPLICING VIA SPLICEOSOME	-1.13795	1.01929	2
REGULATION OF OSSIFICATION	-1.13755	1.1092	2
EYE MORPHOGENESIS	-1.13734	1.0842	2
REGULATION OF PROTEIN SERINE THREONINE KINASE ACTIVITY	-1.00707	1.13728	2
NEGATIVE REGULATION OF STRESS ACTIVATED PROTEIN KINASE SIGNALING CASCADE	-0.909564	-1.13655	1
CELLULAR RESPONSE TO RETINOIC ACID	-1.13626	0.926914	2
POSITIVE REGULATION OF PROTEIN IMPORT	-0.676584	-1.13604	1
MEMBRANE DOCKING	-1.13597	-0.9816	1
NEGATIVE REGULATION OF CELL CYCLE PROCESS	-1.12572	-1.13588	1
CELLULAR RESPONSE TO ALKALOID	-0.527994	1.13588	2
MISMATCH REPAIR	-1.13581	0.743188	2
RESPONSE TO FIBROBLAST GROWTH FACTOR	-0.993359	1.13564	2
MITOCHONDRIAL TRANSLATION	-1.1355	-0.886706	1
REGULATION OF MICROTUBULE CYTOSKELETON ORGANIZATION	-1.13514	0.88894	2
POSITIVE REGULATION OF CARTILAGE DEVELOPMENT	-1.13514	-0.980324	1
REGULATION OF KIDNEY DEVELOPMENT	1.13502	1.08729	3
REGULATION OF CALCIUM ION TRANSMEMBRANE TRANSPORTER ACTIVITY	-1.1343	0.95963	2
REGULATION OF MICROTUBULE POLYMERIZATION OR DEPOLYMERIZATION	-1.1343	1.07784	2
REGULATION OF PROTEIN LOCALIZATION TO PLASMA MEMBRANE	-1.03696	-1.1339	1
POSITIVE REGULATION OF B CELL MEDIATED IMMUNITY	-1.13353	-0.617263	1
NATURAL KILLER CELL MEDIATED IMMUNITY	-1.02805	-1.13342	1
PATTERN RECOGNITION RECEPTOR SIGNALING PATHWAY	-0.658348	1.1334	2
METANEPHROS MORPHOGENESIS	1.13327	0.762094	3
METANEPHRIC EPITHELIUM DEVELOPMENT	1.13306	-1.03135	4
DNA STRAND ELONGATION	-0.987113	-1.13294	1
POSITIVE REGULATION OF MONOOXYGENASE ACTIVITY	0.974573	1.13272	3
CELLULAR RESPONSE TO HYDROGEN PEROXIDE	-1.13227	0.72782	2
CELLULAR RESPONSE TO TOPOLOGICALLY INCORRECT PROTEIN	-1.13209	-1.02733	1
MYELOID LEUKOCYTE ACTIVATION	-0.952078	-1.13208	1
REGULATION OF NEUROBLAST PROLIFERATION	-0.756583	1.13157	2
REGULATION OF PROTEASOMAL PROTEIN CATABOLIC PROCESS	-1.13148	-0.894755	1
CELL SURFACE RECEPTOR SIGNALING PATHWAY INVOLVED IN CELL CELL SIGNALING	-1.0376	1.13123	2
MACROPHAGE DIFFERENTIATION	-0.720183	-1.13119	1
NEGATIVE REGULATION OF WOUND HEALING	-1.13116	1.03429	2
AMYLOID FIBRIL FORMATION	1.12999	0.567984	3
REGULATION OF B CELL ACTIVATION	-0.867967	1.12982	2
ERK1 AND ERK2 CASCADE	-1.08191	1.1298	2
ALCOHOL METABOLIC PROCESS	-1.12956	1.02432	2
MICROTUBULE POLYMERIZATION	-1.12945	0.877242	2
POSITIVE REGULATION OF INSULIN SECRETION	-0.958318	1.12945	2
REGULATION OF FAT CELL DIFFERENTIATION	-0.749132	1.12936	2
B CELL DIFFERENTIATION	-0.752928	1.12927	2
PROTEIN DEMETHYLATION	0.911639	-1.12914	4
FEMALE GAMETE GENERATION	-1.12913	1.05067	2
CEREBRAL CORTEX RADIALLY ORIENTED CELL MIGRATION	-0.651283	1.12903	2
NEGATIVE REGULATION OF RNA CATABOLIC PROCESS	1.12892	-0.593007	4
NEGATIVE REGULATION OF PROTEIN MODIFICATION PROCESS	-1.12869	0.977968	2
REGULATION OF GLUCONEOGENESIS	-1.12802	-0.852058	1
PIRNA METABOLIC PROCESS	-1.12791	0.876836	2
REGULATION OF ALTERNATIVE MRNA SPLICING VIA SPLICEOSOME	-1.11233	1.12775	2
MITOPHAGY	-1.12773	-0.761562	1
ER NUCLEUS SIGNALING PATHWAY	-1.1277	1.09793	2
REGULATION OF IMMUNOGLOBULIN PRODUCTION	-1.12671	0.648099	2
CORNIFICATION	-1.1266	1.09853	2
KINETOCHORE ORGANIZATION	-1.12628	0.703091	2
WATER SOLUBLE VITAMIN METABOLIC PROCESS	-0.842842	-1.12627	1
NEGATIVE REGULATION OF ORGAN GROWTH	-0.81808	1.12584	2
REGULATION OF COAGULATION	-1.12553	0.786747	2
POSITIVE REGULATION OF TELOMERASE ACTIVITY	-0.730123	-1.12511	1
INTERLEUKIN 6 MEDIATED SIGNALING PATHWAY	-0.902822	-1.12497	1
ATTACHMENT OF SPINDLE MICROTUBULES TO KINETOCHORE	-1.12469	1.00697	2
DETECTION OF LIGHT STIMULUS	-1.12467	0.955115	2
POSITIVE REGULATION OF ANION TRANSPORT	-1.12456	0.892643	2
UBIQUITIN DEPENDENT PROTEIN CATABOLIC PROCESS VIA THE MULTIVESICULAR BODY SORTING PATHWAY	0.588624	-1.12447	4
MODIFIED AMINO ACID TRANSPORT	0.733459	1.12439	3
NEGATIVE REGULATION OF PLASMA MEMBRANE BOUNDED CELL PROJECTION ASSEMBLY	-0.576484	-1.12418	1
CELL CYCLE G1 S PHASE TRANSITION	-0.957848	1.124	2
CHONDROCYTE DEVELOPMENT	-1.02501	1.12386	2
SMOOTH MUSCLE CELL MIGRATION	-0.862821	-1.1237	1
LYMPHOCYTE CHEMOTAXIS	1.12364	0.749366	3
CHROMOSOME CONDENSATION	1.12347	-0.676388	4
MATURATION OF LSU RRNA	-1.12311	-0.810602	1
PLASMINOGEN ACTIVATION	-1.12289	-0.802511	1
GLOBAL GENOME NUCLEOTIDE EXCISION REPAIR	-1.12284	0.91474	2
GLUCAN BIOSYNTHETIC PROCESS	1.1227	0.766794	3
CELL CELL SIGNALING BY WNT	-0.996206	1.12254	2
TRANSCRIPTION INITIATION FROM RNA POLYMERASE I PROMOTER	-0.459794	-1.1222	1
REGULATION OF EXTRINSIC APOPTOTIC SIGNALING PATHWAY IN ABSENCE OF LIGAND	-0.614641	1.1222	2
MICROTUBULE BUNDLE FORMATION	-0.781792	-1.12197	1
LIVER REGENERATION	-1.12151	-0.920253	1
NADH DEHYDROGENASE COMPLEX ASSEMBLY	-1.12141	-0.907316	1
REGULATION OF ENDOTHELIAL CELL MIGRATION	1.12107	0.83038	3
POSITIVE REGULATION OF SMALL GTPASE MEDIATED SIGNAL TRANSDUCTION	-1.12094	-0.700765	1
CENTRIOLE ASSEMBLY	-0.830024	-1.12082	1
POSITIVE REGULATION OF TYROSINE PHOSPHORYLATION OF STAT PROTEIN	1.07262	-1.12079	4
MONOCARBOXYLIC ACID BIOSYNTHETIC PROCESS	-0.878296	-1.12013	1
RESPONSE TO MITOCHONDRIAL DEPOLARISATION	-0.928669	-1.12012	1
ADULT BEHAVIOR	-1.11961	0.844707	2
DETECTION OF ABIOTIC STIMULUS	-1.11961	0.813762	2
POSITIVE REGULATION OF SYNAPTIC TRANSMISSION GLUTAMATERGIC	-0.869213	1.11959	2
OOCYTE MATURATION	0.897113	1.11959	3
VASCULAR TRANSPORT	-0.6239	-1.11942	1
DNA DEPENDENT DNA REPLICATION	-1.11938	0.82121	2
DNA BIOSYNTHETIC PROCESS	-1.11912	-0.800694	1
POSITIVE REGULATION OF CALCIUM ION TRANSPORT	-0.928871	1.11847	2
POSITIVE REGULATION OF G1 S TRANSITION OF MITOTIC CELL CYCLE	1.11805	-1.01517	4
BETA CATENIN DESTRUCTION COMPLEX DISASSEMBLY	-1.11729	0.914182	2
CELLULAR RESPONSE TO BIOTIC STIMULUS	-0.624075	1.11709	2
ENDOSOMAL TRANSPORT	-0.771956	-1.117	1
MODULATION BY HOST OF SYMBIONT PROCESS	-1.11661	-0.659331	1
POSITIVE REGULATION OF MYELOID CELL DIFFERENTIATION	-0.994261	-1.11649	1
RESPONSE TO MUSCLE STRETCH	1.03238	1.11613	3
RELAXATION OF MUSCLE	-1.11611	-0.89331	1
NEGATIVE REGULATION OF EPITHELIAL CELL APOPTOTIC PROCESS	-1.11608	-0.820245	1
MITOCHONDRIAL FUSION	-0.39299	-1.11557	1
CELL CYCLE PHASE TRANSITION	-1.11527	-1.00536	1
MITOTIC NUCLEAR DIVISION	-1.11518	-1.04721	1
POSITIVE REGULATION OF ACTIN FILAMENT POLYMERIZATION	-0.846216	-1.11498	1
POSITIVE REGULATION OF DNA BIOSYNTHETIC PROCESS	-0.9211	-1.11482	1
LIPID MODIFICATION	-0.765437	-1.1147	1
LEUKOCYTE MEDIATED IMMUNITY	-1.02523	-1.1147	1
MITOTIC SPINDLE ORGANIZATION	-1.11462	-0.925196	1
PROTEIN O LINKED GLYCOSYLATION	-1.01854	1.1146	2
REGULATION OF DEVELOPMENTAL GROWTH	-0.812482	1.11453	2
REGULATION OF LIPID STORAGE	1.11414	0.804768	3
CARBOHYDRATE TRANSMEMBRANE TRANSPORT	-1.11413	-0.752287	1
DEVELOPMENTAL MATURATION	-0.754463	1.11404	2
INTERFERON GAMMA MEDIATED SIGNALING PATHWAY	-1.11341	0.959587	2
REGULATION OF CELLULAR EXTRAVASATION	-0.834936	-1.11277	1
ESTABLISHMENT OF ENDOTHELIAL BARRIER	-1.11251	-0.773412	1
MAINTENANCE OF CELL NUMBER	-0.807451	1.11238	2
REGULATION OF EXTRACELLULAR MATRIX ORGANIZATION	-1.11235	0.67791	2
TRANSCRIPTION BY RNA POLYMERASE I	-0.811568	1.11214	2
CELLULAR AMINO ACID CATABOLIC PROCESS	-1.1121	-1.09028	1
REGULATION OF UBIQUITIN PROTEIN LIGASE ACTIVITY	-0.920427	-1.11202	1
OLIGODENDROCYTE DIFFERENTIATION	1.01957	-1.112	4
AMMONIUM ION METABOLIC PROCESS	-1.11184	1.09669	2
SENSORY PERCEPTION OF LIGHT STIMULUS	-1.00216	1.11179	2
CELLULAR RESPONSE TO ORGANIC CYCLIC COMPOUND	-0.86878	1.11173	2
PIGMENT GRANULE ORGANIZATION	-0.826565	1.11146	2
NEGATIVE REGULATION OF PROTEIN TYROSINE KINASE ACTIVITY	-1.11146	0.946455	2
NUCLEOSIDE METABOLIC PROCESS	-1.11121	-1.03802	1
INORGANIC ION IMPORT ACROSS PLASMA MEMBRANE	1.11111	0.776419	3
NEGATIVE REGULATION OF PHOSPHORYLATION	-0.984578	1.11108	2
NEGATIVE REGULATION OF MRNA CATABOLIC PROCESS	1.11059	-0.600631	4
LABYRINTHINE LAYER MORPHOGENESIS	-1.11046	-0.835328	1
REGULATION OF MAP KINASE ACTIVITY	-1.11046	1.08146	2
POSITIVE REGULATION OF HORMONE SECRETION	-1.1104	0.900748	2
MYELOID LEUKOCYTE DIFFERENTIATION	-0.923831	1.11035	2
NEGATIVE REGULATION OF ANION TRANSPORT	-0.792225	-1.11034	1
RESPONSE TO CADMIUM ION	-1.11033	0.908821	2
NEURON CELLULAR HOMEOSTASIS	-1.11031	0.937583	2
CELLULAR BIOGENIC AMINE METABOLIC PROCESS	-0.959899	1.11012	2
RESPONSE TO ALCOHOL	-1.10962	0.939911	2
CARBOHYDRATE PHOSPHORYLATION	0.83004	-1.10944	4
B CELL PROLIFERATION	0.948036	1.10925	3
POSITIVE REGULATION OF INTERLEUKIN 8 PRODUCTION	-0.772915	1.10896	2
REGULATION OF HUMORAL IMMUNE RESPONSE	-0.617382	-1.10878	1
REGULATION OF MACROPHAGE DERIVED FOAM CELL DIFFERENTIATION	1.10874	0.848062	3
MUSCLE HYPERTROPHY	1.1087	-1.03508	4
NEGATIVE REGULATION OF ION TRANSPORT	-1.1086	1.03109	2
LEUKOCYTE ADHESION TO VASCULAR ENDOTHELIAL CELL	0.822115	-1.10849	4
NEGATIVE REGULATION OF CARTILAGE DEVELOPMENT	-1.10839	-1.05513	1
TISSUE MIGRATION	0.926151	-1.10834	4
VESICLE BUDDING FROM MEMBRANE	-1.1082	0.754014	2
REGULATION OF ISOTYPE SWITCHING	-1.10816	-0.642976	1
REGULATION OF SMOOTHENED SIGNALING PATHWAY	-1.10788	0.816373	2
NEGATIVE REGULATION OF REACTIVE OXYGEN SPECIES BIOSYNTHETIC PROCESS	-1.10765	-0.877106	1
CARDIOCYTE DIFFERENTIATION	1.10749	-1.04071	4
POSITIVE REGULATION OF ANIMAL ORGAN MORPHOGENESIS	-1.10733	-0.89362	1
MITOCHONDRIAL RESPIRATORY CHAIN COMPLEX ASSEMBLY	-1.10723	0.934162	2
POSITIVE REGULATION OF ENDOTHELIAL CELL MIGRATION	-0.722319	-1.10723	1
DETECTION OF MECHANICAL STIMULUS	-0.617346	-1.10672	1
REGULATION OF LIPID METABOLIC PROCESS	-1.06477	1.10656	2
ACROSOME REACTION	0.55459	1.10633	3
MELANOCYTE DIFFERENTIATION	-1.10611	-1.03595	1
RESPONSE TO FLUID SHEAR STRESS	1.03183	1.10575	3
PROTEIN LOCALIZATION TO LYSOSOME	0.544666	-1.10504	4
NEGATIVE REGULATION OF CELLULAR CATABOLIC PROCESS	-1.10482	-1.10377	1
REGULATION OF CELL ACTIVATION	-0.832554	1.10469	2
LUNG CELL DIFFERENTIATION	-1.10405	0.848702	2
DEFENSE RESPONSE TO VIRUS	-1.10398	1.03874	2
SKELETAL MUSCLE CELL DIFFERENTIATION	-0.799177	-1.10324	1
FC EPSILON RECEPTOR SIGNALING PATHWAY	1.10306	-0.863553	4
IMMUNOGLOBULIN PRODUCTION	-0.915054	1.10235	2
RESPONSE TO TOXIC SUBSTANCE	1.10233	1.08185	3
EXTRACELLULAR MATRIX ASSEMBLY	0.95165	1.10218	3
CYCLIC NUCLEOTIDE MEDIATED SIGNALING	-1.10215	-0.686214	1
CELLULAR RESPONSE TO MECHANICAL STIMULUS	-0.848736	1.10165	2
INOSITOL PHOSPHATE BIOSYNTHETIC PROCESS	-1.00619	-1.10165	1
FATTY ACID BIOSYNTHETIC PROCESS	-0.960622	-1.10164	1
PHAGOSOME ACIDIFICATION	-1.02817	-1.10154	1
TETRAPYRROLE METABOLIC PROCESS	-1.0728	-1.10133	1
RENAL FILTRATION	0.782154	1.10109	3
PHOSPHATIDYLINOSITOL PHOSPHORYLATION	-0.761319	-1.10099	1
MITOCHONDRIAL TRANSPORT	-1.07163	-1.10098	1
REGULATION OF CELL CYCLE ARREST	-1.10069	1.09987	2
SYNCYTIUM FORMATION	-1.10042	1.08376	2
LYMPHOCYTE ACTIVATION	-0.861706	1.09997	2
POSITIVE REGULATION OF MEMBRANE PERMEABILITY	-0.907976	1.09981	2
POSITIVE REGULATION OF BMP SIGNALING PATHWAY	-1.09976	1.0022	2
MITOCHONDRIAL CALCIUM ION TRANSMEMBRANE TRANSPORT	-0.842965	-1.09976	1
REGULATION OF UBIQUITIN DEPENDENT PROTEIN CATABOLIC PROCESS	-1.09955	-0.888081	1
HOMOPHILIC CELL ADHESION VIA PLASMA MEMBRANE ADHESION MOLECULES	0.76535	1.09945	3
HEPARAN SULFATE PROTEOGLYCAN BIOSYNTHETIC PROCESS	-1.09936	-0.82247	1
CEREBELLAR CORTEX FORMATION	1.09924	1.04963	3
POSITIVE REGULATION OF ORGANELLE ORGANIZATION	-1.09902	0.7036	2
RETINA MORPHOGENESIS IN CAMERA TYPE EYE	-0.977246	-1.09893	1
NEGATIVE REGULATION OF PHOSPHORUS METABOLIC PROCESS	-1.06921	1.09885	2
RESPONSE TO HYDROGEN PEROXIDE	-1.09813	-0.856637	1
RESPONSE TO CALCIUM ION	-1.09809	-1.02498	1
MITOCHONDRION ORGANIZATION	-1.0979	0.980735	2
CARBOHYDRATE BIOSYNTHETIC PROCESS	-1.03281	1.09784	2
ESTABLISHMENT OF PROTEIN LOCALIZATION TO CHROMOSOME	-0.896276	-1.09757	1
TERMINATION OF RNA POLYMERASE I TRANSCRIPTION	-0.604863	-1.09726	1
NEGATIVE REGULATION OF TRANSPORT	-1.09722	-1.03172	1
REGULATION OF ADENYLATE CYCLASE ACTIVITY	-0.887849	1.09721	2
REGULATION OF DNA BINDING TRANSCRIPTION FACTOR ACTIVITY	-1.08979	1.09708	2
ACTOMYOSIN STRUCTURE ORGANIZATION	-0.932408	1.09699	2
SELECTIVE AUTOPHAGY	-1.0969	-0.61644	1
HETEROPHILIC CELL CELL ADHESION VIA PLASMA MEMBRANE CELL ADHESION MOLECULES	-0.837419	1.09681	2
SENSORY PERCEPTION OF CHEMICAL STIMULUS	1.0966	0.727041	3
[truncated: 1,120 more rows]

## Sheet: S2.2 All Genes&Regions
Supplemental Data Table 2.2: All Genes and Regions Log2FC and p-values
Gene Name	LW->Mat Log2FC	LW->Mat p-values	ND->LW Log2FC	ND->LW p-values
SLC44A3	-0.764726	1.43e-06	-0.0496159	0.107305
TNS3	0.148134	1.4e-05	0.093789	0.00509739
AMEX60DD034679	0.164983	2.1e-05	-0.00419683	0.921966
MAGI2	0.14218	2.64e-05	-0.0323982	0.112414
HMCN1	0.241115	2.86e-05	0.0189394	0.584684
TRPM3	0.1433	2.98e-05	0.038892	0.0586556
GRM5	0.269049	3.14e-05	0.0406589	0.502905
PTPRF	-0.162309	5.19e-05	-0.0225427	0.373537
SCUBE2	0.129873	6.65e-05	0.0281414	0.155294
LAMP5	0.293194	7.65e-05	-0.0599722	0.189661
AMEX60DD032279	-0.490986	7.73e-05	-0.00490868	0.965535
GLG1	-0.134757	8.49e-05	-0.031734	0.319851
ADAMTS7	0.178155	8.58e-05	0.0510136	0.148847
MAN2A1	-0.190751	8.58e-05	-0.0577808	0.0099968
LGR6	0.26888	9.59e-05	0.0803545	0.226248
JPH4	0.212063	9.86e-05	0.00215823	0.965554
PTPRR	0.141772	0.000103378	-0.0108514	0.723284
AMEX60DD038466	0.147943	0.000135654	0.0367542	0.10962
AMEX60DD033872	-0.293699	0.000188462	0.0060619	0.878832
UBE2E3	-0.307679	0.000192835	0.0792353	0.107875
SRRM2	-0.147373	0.000196167	-0.05895	0.0159967
ZRANB1	-0.231271	0.000196279	0.0307577	0.42245
AMEX60DD026136	-0.539786	0.000219874	0.0720985	0.523582
AMEX60DD035259	0.4418	0.000243858	-0.0756016	0.412472
TMIE	0.381269	0.000253691	-0.00644394	0.916222
CP	0.154541	0.000273543	0.0108931	0.834305
AMEX60DD053723	0.247279	0.000328312	-0.0243617	0.586575
APLP2	-0.835105	0.00033347	0.0346133	0.388205
NPL	0.188693	0.000349716	0.00494721	0.878101
AMEX60DD035503	0.50695	0.000364882	-0.0728685	0.347433
ND5	0.408178	0.000371241	-0.0577645	0.464264
AMEX60DD022237	0.198292	0.000387522	-0.0248602	0.464878
DELE1	-0.248336	0.000393138	0.0333083	0.452194
AMEX60DD027767	0.3498	0.000414351	-0.00182929	0.987009
PLD5	0.126646	0.000429365	-0.040616	0.122287
FYCO1	0.170838	0.000435839	-0.00312719	0.918984
NPNT	0.282257	0.00043809	0.0366725	0.594213
AMEX60DD028712	0.311309	0.000463243	0.0374791	0.575552
SEMA4F	-0.32935	0.0004713	-0.0772091	0.24626
AMEX60DD004590	1.48558	0.000533726	0.122898	0.632746
UBE2T	0.15602	0.000541193	0.0367093	0.354249
FCHSD1	0.171706	0.000605777	-0.0471856	0.120676
COL7A1	0.19356	0.000638592	0.0821357	0.00636347
SMARCE1	-0.394124	0.000658929	-0.0434959	0.661686
ADCK5	-0.14422	0.000685115	-0.0186787	0.693011
FAM184B	0.159878	0.00068797	0.0196585	0.576757
AMEX60DD021604	2.98438	0.000692379	-0.0168271	0.949069
CC2D2B	0.135545	0.000700612	-0.0288409	0.388864
RTEL1	-0.109091	0.000720246	-0.0254809	0.525972
AMEX60DD006819	0.351211	0.000735274	-0.052484	0.51838
AMEX60DD054247	0.27535	0.000751688	0.142663	0.398064
NKX2-5	0.743379	0.000759125	0.150378	0.240068
AMEX60DD042856	-1.00556	0.000768214	0.0896839	0.625272
PBDC1	-0.365555	0.000813788	-0.0924452	0.174807
AMEX60DD052593	0.26228	0.000903898	-0.129107	0.00763333
LRP1B	0.0701123	0.000904312	-0.018209	0.548723
AMEX60DD023442	0.374145	0.000906964	0.0312672	0.632104
AMEX60DD043197	-1.00181	0.000956377	-0.135383	0.499318
ARHGEF4	0.149714	0.00101305	0.0209044	0.494065
DOCK3	0.0894844	0.00101337	-0.0189945	0.504429
CIDEB	0.602928	0.00107748	0.0833464	0.553944
AGBL1	0.208371	0.00108712	-0.0401395	0.0602094
MILR1	0.207639	0.00109173	-0.00655021	0.922914
PPFIA4	0.207312	0.00110545	-0.010383	0.757678
ROBO2	0.160181	0.00114149	-0.0400884	0.456915
AARS2	-0.217978	0.00124833	0.011996	0.77011
AMEX60DD020962	0.381772	0.00124902	0.0366929	0.511988
AMEX60DD036942	0.326472	0.00125985	0.00662734	0.913727
USP44	-0.172968	0.00126189	0.0188033	0.739864
DNAAF3	0.237596	0.00126454	0.0814176	0.0656242
THSD4	0.18931	0.00130366	0.0329822	0.0693904
TMF1	-0.148137	0.0013588	-0.0152341	0.691588
CNR1	0.207788	0.00140867	0.0640107	0.0957269
HHATL	0.196393	0.00143676	-0.00682289	0.852167
AMEX60DD042943	0.618932	0.00143748	-0.161378	0.194704
UBR7	-0.213552	0.00144082	-0.0403209	0.370354
CATIP	0.177032	0.00144647	-0.0383813	0.412535
MYO1C	-0.159936	0.00145003	-0.0104273	0.826399
CHN1	0.249582	0.00152645	0.097189	0.0973963
RUNX2	0.22018	0.00153124	0.0263417	0.48472
OFD1	-0.116091	0.00159559	-0.00590009	0.798404
SLC25A14	-0.179128	0.00160652	0.00480251	0.942185
ABCC9	0.165378	0.00161972	-0.0154129	0.466281
MUC5AC	0.66777	0.00162501	0.103842	0.269784
AMEX60DD011765	0.201906	0.00163081	0.004291	0.90919
NFKB1	0.190276	0.00164095	-0.0363308	0.154972
AMEX60DD033992	1.45387	0.00165128	0.0907682	0.66134
NACC1	-0.368912	0.00167837	0.0972656	0.416991
PARVG	0.176059	0.00169067	-0.0162853	0.771688
P2RY12	0.39444	0.0017112	-0.0755459	0.527646
CLCF1	0.115704	0.00172446	0.0822974	0.00868983
MEGF11	0.167108	0.00174852	0.0172506	0.694256
SPACA1	0.118976	0.00184121	0.0275303	0.579193
PANK4	-0.140259	0.00187649	-0.00539416	0.846089
AMEX60DD019923	-3.98854	0.00188871	-0.74634	0.27671
AMEX60DD016069	-3.98854	0.00188871	-0.553695	0.303093
AIG1	0.0874521	0.00201856	-0.0325191	0.309309
ND4	0.511791	0.00208372	-0.0663187	0.518134
ANO2	0.251452	0.00210568	-0.0138079	0.776469
CDK14	0.106911	0.00212096	0.0529366	0.173274
AMEX60DD012386	-0.258541	0.00212363	-0.100876	0.185207
AACS	-0.200329	0.00212582	-0.043818	0.401211
ESPN	0.0986543	0.00218655	-0.00829702	0.803928
AMEX60DD049141	2.39247	0.00220486	0.705039	0.0130259
AMEX60DD006688	0.275143	0.00220588	0.0970425	0.0747931
AMEX60DD024665	0.575179	0.00221521	0.185086	0.302121
TBC1D19	0.134004	0.00224465	-0.0238034	0.16768
CMKLR1	0.147398	0.00229503	-0.0223896	0.640455
VPS37B	0.3669	0.00232065	0.141178	0.0388022
CDK12	-0.158214	0.00232349	0.0541469	0.0778792
HIGD1C	0.314656	0.00236293	-0.0831194	0.185062
AMEX60DD033179	3.86792	0.00236559	-0.0198966	0.975751
PRKAA1	3.86792	0.00236559	-0.0364439	0.421699
AMEX60DD036759	-0.605021	0.00241685	-0.0419789	0.802408
MAD1L1	0.201788	0.00247318	0.132916	0.0011355
MYO10	0.209264	0.0024935	0.0522798	0.288426
XPOT	-0.116129	0.00261344	-0.0187745	0.627439
ZMAT4	0.176981	0.0026164	-0.0171994	0.621893
HS3ST2	0.192414	0.00263193	-0.0303677	0.569505
CAMTA1	0.110583	0.00266444	0.0266201	0.503189
PLAU	-0.640103	0.00267344	0.290001	0.0263905
AMEX60DD014677	0.490962	0.0027214	-0.161378	0.105797
IFT74	0.191155	0.00287359	0.0345214	0.382857
AMEX60DD031004	0.37141	0.00291778	0.0861655	0.299197
MYO16	0.107389	0.00297038	-0.0289698	0.138356
ZNF541	-0.236059	0.00297405	-0.0369988	0.426555
N/A	0.119067	0.00298951	-0.00837758	0.495587
TRMT5	-0.416492	0.00302944	-0.0734016	0.410513
AMEX60DD017878	0.268465	0.0030709	0.035455	0.576398
TMEFF1	0.13904	0.00308968	0.0155194	0.596098
GPM6B	0.179478	0.0031142	0.0098801	0.785115
ZNF711	-0.111313	0.00320822	-0.0123797	0.788268
TDRD9	-0.632488	0.00322995	-0.0333311	0.0744696
NCF2	0.223719	0.00324661	-0.00710853	0.877581
GRHL2	-0.150008	0.00325852	-0.0510353	0.254099
MXRA7	-0.178104	0.00326983	-0.0544264	0.263815
AMEX60DD050330	-0.184302	0.00331394	0.0467464	0.348671
MED13L	-0.0838769	0.00331974	-0.0338545	0.443248
LRP2BP	0.21296	0.00334261	0.040814	0.259786
ADCY7	0.096371	0.00336861	0.0124575	0.77375
ABHD17B	-0.287299	0.00337966	0.029991	0.621138
AMEX60DD002429	-3.79589	0.00345206	-0.38377	0.486068
AMEX60DD050206	-3.79589	0.00345207	1.03127	0.191867
MYT1L	0.0965416	0.00348308	0.0178125	0.351991
NRN1L	0.154067	0.00352696	-0.0684617	0.141415
LARP4	-0.15048	0.00355306	0.0421608	0.185494
SLC18B1	0.136957	0.00357533	0.00465449	0.88589
PARP1	-0.126505	0.00361583	-0.0108583	0.819743
AMEX60DD028713	0.367218	0.0036319	-0.22399	0.523703
PRRC2A	-0.109249	0.00365887	-0.0357902	0.210159
AMEX60DD003193	-1.38485	0.00367198	0.0170882	0.967545
AMEX60DD034854	0.219364	0.0036807	-0.0483513	0.515238
MTUS2	-0.282745	0.00377596	0.0421048	0.438673
AMEX60DD031001	0.602124	0.00380481	0.042074	0.736148
DNAH17	0.119194	0.00383929	-0.0261744	0.161101
AMEX60DD032482	0.339942	0.00384957	0.0929302	0.227615
AP3M1	-0.259787	0.00385866	-0.0391106	0.643894
ADAMTS3	0.124565	0.0038591	0.0131593	0.732901
AMEX60DD019915	0.25567	0.00386397	0.0593696	0.245724
AMEX60DD021290	0.379255	0.0039141	-0.00750233	0.918133
AMEX60DD043480	3.698	0.00396584	1.40978	0.0633203
AMEX60DD009355	3.698	0.00396586	-0.138658	0.779691
AMEX60DD008639	3.69799	0.00396589	-0.175184	0.748629
KLHL1	0.0993101	0.00402494	-0.00300193	0.938279
SLC7A14	0.268407	0.00403344	0.0768143	0.263103
CGRRF1	-0.190294	0.00404192	-0.0538118	0.17232
DLG3	-0.186585	0.00405327	0.0213847	0.492854
AMEX60DD028281	-0.88445	0.00406091	-0.103892	0.581386
AMEX60DD036307	0.179686	0.00406755	0.0388246	0.30855
SLC16A10	0.261087	0.00411703	0.123433	0.0911945
RNF220	0.136965	0.00412526	0.0120904	0.664955
ATG2B	-0.0836393	0.00413267	-0.0204717	0.368566
LMTK3	0.178056	0.00414699	0.0289293	0.430927
SUZ12	-0.112828	0.00415758	-0.0361976	0.280625
AMEX60DD028153	0.115922	0.00432306	-0.0854538	0.0971688
FAM118A	0.173227	0.00432683	-0.0141851	0.332596
MOGS	-0.372591	0.00435353	-0.035207	0.665135
ND1	0.387348	0.00435409	-0.0250528	0.768263
ESR1	0.123744	0.00437529	-0.0222467	0.258766
TMEM8B	-0.153147	0.00440901	-0.00785721	0.85853
CERK	0.130098	0.00446155	-0.0177457	0.512151
WNK3	-0.0930379	0.00447016	-0.0280889	0.361171
PLEKHN1	-0.345594	0.00448802	-0.0529874	0.481119
HIC2	-0.169268	0.00452058	0.0186487	0.74742
AFF1	-0.169399	0.00455844	-0.0384547	0.215265
BCLAF3	-0.12503	0.00456126	0.00754385	0.878219
UBE2Q2	-0.0970186	0.00457123	-0.0255391	0.225041
TREX2	-1.40411	0.00457596	-0.035006	0.790659
ADAM11	-0.190623	0.00458538	-0.0482629	0.541396
UPF3B	-0.139487	0.00460122	-0.0244516	0.619706
KCNK3	0.189457	0.00466206	0.0278305	0.459652
LYPD6B	0.14933	0.0046854	0.0439577	0.15676
AMEX60DD027378	0.646518	0.00470206	0.00243313	0.989643
RAPGEFL1	-0.269796	0.0047033	-0.0734934	0.358555
DCTN4	-0.158384	0.00477477	0.0239952	0.482187
MMS19	-0.110698	0.00478033	-0.016924	0.548497
RGS7	0.0907508	0.00478624	-0.00193082	0.949148
ADAMTSL1	0.117388	0.00484356	0.0261964	0.474771
PCSK5	0.123476	0.00490124	0.0258322	0.463965
AMEX60DD007697	0.233875	0.00490468	-0.0492299	0.335334
ADAMTS9	0.1981	0.00492926	-0.00220589	0.95241
PLP2	-0.2926	0.00498946	-0.0277312	0.648542
CDHR5	0.182384	0.00499431	0.0417687	0.452891
AMEX60DD048707	-4.06329	0.00503301	-0.305768	0.490078
AMEX60DD022421	0.473609	0.00503529	-0.022172	0.821333
MRPL54	-0.365237	0.00504451	0.0181815	0.851555
IL20RB	0.231185	0.00510329	0.0729588	0.149299
CASR	0.089715	0.00511086	0.0219154	0.443519
LRRC59	-0.280528	0.00512754	0.0581202	0.32742
AMEX60DD050838	-3.03798	0.00515236	-0.32237	0.477674
GPC4	-0.214955	0.00515476	0.0451915	0.338803
AMEX60DD048551	-0.268593	0.00520449	0.0933218	0.196504
AMEX60DD037010	0.211584	0.00521124	-0.0186921	0.678293
AMEX60DD040439	-0.595493	0.00521395	0.00612896	0.965909
AMEX60DD033908	0.221907	0.00521769	0.0274354	0.559606
NPFFR1	0.199913	0.00522959	-0.00682389	0.872289
RCSD1	0.356218	0.00524625	0.0428166	0.442057
AMEX60DD018763	0.239169	0.00542485	0.00979236	0.853613
AMEX60DD025786	0.133982	0.00543649	0.0474811	0.12061
SORBS2	0.107374	0.00545287	0.0190672	0.412606
XPO5	-0.0767923	0.0054788	-0.0186659	0.447344
AMEX60DD056359	-3.48617	0.0054986	-1.34724	0.0120862
AMEX60DD043178	-0.961165	0.00561492	0.287281	0.135987
DAAM1	-0.118942	0.00561896	0.0270844	0.309395
SWT1	0.0797252	0.00570125	0.0177852	0.258548
KCNK13	-1.42654	0.00570314	0.0906458	0.624407
DDX18	-0.26065	0.00576405	-0.0933915	0.0995674
DOK6	0.186609	0.00579849	0.00520107	0.942242
NICN1	0.189743	0.00584096	0.107973	0.0401404
AMEX60DD027316	0.465747	0.00586522	-0.0579265	0.568175
LRRC6	0.0961966	0.00596769	-0.0107248	0.834524
AMEX60DD008658	0.775801	0.00602258	0.148555	0.51697
TICRR	-0.142574	0.00608463	-0.0846969	0.023624
AMEX60DD014733	0.222104	0.00608737	0.0480388	0.442299
NUP93	-0.104776	0.00610881	0.0219121	0.474685
AMEX60DD015968	0.385094	0.00615055	0.0550659	0.669704
AMEX60DD020223	0.202167	0.00617356	0.010041	0.818472
AUTS2	-0.242645	0.00619729	0.0894721	0.0697853
UNC13A	0.746426	0.00633131	0.0834553	0.169577
NPR2	0.125659	0.00637187	0.000268961	0.997095
TRPM8	0.266037	0.00637495	0.0375786	0.640087
AMEX60DD026533	0.188269	0.0063793	0.0389679	0.345907
EN2	-0.337921	0.00639026	0.0421469	0.758413
AMEX60DD025582	0.185492	0.00639375	0.0302477	0.67527
PTPRM	0.112985	0.00652033	0.0273254	0.340222
AMEX60DD026101	-0.305119	0.00652936	-0.0331495	0.626811
OTOF	-0.469086	0.00660277	-0.0183987	0.597569
NUP98	-0.117781	0.00665538	0.00497387	0.914717
AMEX60DD026791	-1.97909	0.00665542	-0.0391221	0.902311
AMEX60DD038789	0.20975	0.0066569	-0.0767804	0.0574913
AMEX60DD022266	-3.5735	0.00666006	-0.209741	0.722686
AMEX60DD031775	-3.5735	0.00666006	0.18327	0.78218
AMEX60DD031295	-3.5735	0.00666006	1.83862	0.111947
AMEX60DD020509	-3.5735	0.00666007	0.561782	0.369187
AMEX60DD049729	-3.5735	0.00666009	-0.734268	0.20157
NFATC2	0.138349	0.0067318	0.00236842	0.958869
MMRN1	0.159742	0.00674603	0.0352014	0.570361
MDN1	-0.122574	0.00675296	-0.0373174	0.266263
AMEX60DD014004	0.223236	0.00676204	0.0343706	0.788901
GASK1B	0.172356	0.00686296	-0.038235	0.330406
TRMT9B	0.70972	0.00686534	0.0636887	0.718361
AMEX60DD004915	3.50535	0.00692346	-0.347244	0.567168
AMEX60DD003747	3.50535	0.0069235	-0.88627	0.136166
AMEX60DD054471	3.50535	0.00692352	0.330827	0.53913
AMEX60DD017732	3.50535	0.00692353	0.0787888	0.934178
RGSL1	3.50535	0.00692353	-0.0489774	0.430567
AMEX60DD007183	3.50535	0.00692353	-0.160985	0.830874
AMEX60DD006344	0.144592	0.00693979	0.021015	0.723382
GOLM1	-0.225767	0.00700574	-0.02847	0.429106
AMEX60DD010126	0.676265	0.00700771	-0.18861	0.219431
AMEX60DD020534	1.36367	0.00707429	0.790259	0.0268003
DOK1	-0.408624	0.00707817	0.0312672	0.743749
ATP6V0A2	-0.13109	0.00709384	-0.0397273	0.184175
DNAJC8	0.201168	0.00713555	0.00048499	0.991194
AMEX60DD011599	-0.588772	0.00717719	0.127483	0.365487
AMEX60DD011559	0.163684	0.00718457	-0.00888992	0.80327
LRP12	-0.200724	0.00722511	0.0134028	0.835639
DMRTA2	-0.425833	0.00729308	0.0906458	0.396418
CPSF7	-0.30257	0.00729419	-0.0345706	0.634203
DDI2	-0.23297	0.00731215	-0.0983362	0.0638455
MPI	0.165117	0.00732894	-0.0318827	0.401883
AGMO	0.114386	0.00733897	-0.0494846	0.160736
NR2F2	0.624673	0.0073615	0.0108333	0.959186
KDF1	-0.196129	0.00740611	0.0059438	0.895041
LRRC43	0.127644	0.00743983	0.063612	0.104418
PAG1	0.12636	0.00754494	0.0305729	0.171922
AMEX60DD021461	0.496941	0.0075737	-0.0858268	0.426777
GTDC1	2.11684	0.00764849	0.561782	0.204099
AMEX60DD010906	-0.489281	0.00767695	-0.180237	0.100029
DOLPP1	-0.269269	0.00778833	-0.0357171	0.573593
AMEX60DD001515	0.630123	0.00780032	0.0572624	0.675833
CLIC5	0.262689	0.00780237	0.00291885	0.976658
IFNLR1	0.170034	0.00784087	0.0285416	0.47174
RNF223	-0.835369	0.00785015	0.152283	0.495599
STRN4	-0.145663	0.00786359	-0.0126485	0.705664
AMEX60DD020334	0.159668	0.00787012	-0.0278406	0.452901
AMEX60DD003119	2.86884	0.00788346	0.201192	0.684834
CABP5	0.150308	0.00792396	0.0150979	0.658439
BAHD1	-0.109743	0.00797714	0.0225783	0.3732
AMEX60DD012055	-3.34867	0.00802747	0.472044	0.483779
RAI1	-0.0875693	0.00805365	-0.00414337	0.895233
AMEX60DD054874	0.167134	0.00817639	-0.0487118	0.212869
DGLUCY	0.113653	0.0081952	-0.0309512	0.228374
LAMB1	0.162338	0.00821326	0.10905	0.0025434
AMEX60DD004959	-2.13109	0.00823153	0.294302	0.45127
PEX12	-0.292978	0.00829695	-0.04846	0.522923
AMEX60DD056651	-0.655752	0.00839551	-0.275661	0.25876
FNDC8	0.161957	0.00846684	-0.0366205	0.315859
KCTD15	-0.246567	0.00849468	0.106697	0.0652611
PALLD	0.389742	0.00850461	-0.00577223	0.85975
WDFY1	-0.0870463	0.00854708	-0.00720114	0.906815
AMEX60DD004244	0.192073	0.00859342	-0.0324326	0.465975
THBS3	0.16268	0.00869942	-0.0307581	0.405392
CFAP126	0.217214	0.00871089	-0.0135432	0.783949
AMEX60DD009214	0.407006	0.00871117	0.0254145	0.782106
SENP1	0.08587	0.00873459	0.00161111	0.973655
AMEX60DD044668	0.823107	0.00876389	-0.172747	0.436183
RD3	0.252591	0.00877136	-0.116688	0.0152261
NKX2-8	0.561729	0.00892808	0.142082	0.389929
RBBP4	0.224628	0.00898024	-0.0123896	0.852
ITGBL1	0.125129	0.00909111	-0.0188386	0.483924
GPSM2	-0.13289	0.00911359	-0.0215331	0.499304
AMEX60DD021463	-0.354468	0.00913708	-0.0545746	0.650123
LEF1	0.233728	0.00919183	0.0705907	0.291377
PIAS1	-0.100848	0.0093251	-0.0408328	0.0885806
CCDC62	-0.142552	0.00932996	-0.0143226	0.711072
AMEX60DD002983	0.248526	0.00940137	-0.00409356	0.967586
AMEX60DD048669	-0.473482	0.0094053	-0.0688694	0.539076
AMEX60DD020736	-1.1784	0.00940549	-0.111981	0.79148
MTMR10	-0.16005	0.00940796	-0.0453643	0.377203
ZNF451	-0.250176	0.00947069	-0.0531838	0.170745
GRPR	0.172712	0.00952312	0.052691	0.191425
AMEX60DD038892	0.186074	0.00954421	0.068013	0.12139
REELD1	0.200193	0.00957049	-0.10861	0.0137521
AJAP1	0.10438	0.00961312	-0.0285013	0.363728
RANBP3	-0.0871306	0.00962822	-0.0265396	0.378721
HDAC7	-0.138	0.0097168	-0.0513095	0.131485
PTGS2	0.242127	0.00977254	-0.0619927	0.285285
SLC39A10	0.156449	0.00983629	-0.0804195	0.0202177
TM4SF1	0.750266	0.00985459	-0.393754	0.0317719
NOL12	0.43419	0.00992701	0.0743368	0.616233
AMEX60DD008714	0.205535	0.00998525	-0.0380477	0.432912
E2F4	0.156622	0.0100049	-0.00773342	0.835646
AMEX60DD032932	0.507511	0.0100234	-0.0650464	0.736602
PDP1	-0.408385	0.0100311	0.0467303	0.620822
AMEX60DD026496	0.42712	0.0100316	-0.099175	0.325783
AMEX60DD002318	0.290239	0.0100457	0.0685734	0.316194
CCDC102B	0.158549	0.0101807	-0.0457759	0.231425
TMCC1	0.11611	0.0101873	-0.011216	0.747808
AMEX60DD004413	0.234366	0.0102171	0.00337783	0.951587
AMEX60DD004211	-0.779617	0.0102174	0.165437	0.498747
SMIM20	0.30649	0.0102301	0.0830108	0.273374
CEP192	-0.129332	0.0102334	-0.0619928	0.181779
IKZF5	-0.22041	0.0102367	0.049599	0.334824
AMEX60DD043975	-0.168371	0.0102687	-0.0408686	0.309049
PIK3C3	-0.107414	0.0102763	-0.100348	0.14375
AMEX60DD015380	0.247142	0.0102879	0.00878198	0.94293
AMEX60DD037512	0.368616	0.0103105	0.00151988	0.98397
PTH1R	0.099774	0.0103294	0.0484193	0.131154
AMEX60DD044453	-2.35348	0.0103441	-1.3313	0.0382976
TTC6	-0.112528	0.010362	-0.000329258	0.993974
MYO3A	0.177528	0.0103822	-0.0819434	0.0519191
TLCD4	-0.131957	0.0104534	-0.0137172	0.693369
NCAN	0.077569	0.0105294	-0.0417902	0.209971
PGR	0.130953	0.0105397	0.11013	0.00794477
AMEX60DD032975	2.03883	0.01057	0.384904	0.396557
AMEX60DD053316	0.130466	0.0106227	-0.0125673	0.794542
SOX9	-1.06079	0.0106823	-0.43712	0.0485752
DCAF8	-0.0820225	0.0107344	-0.0237662	0.441682
KPNA5	-0.13109	0.0107512	-0.0329415	0.301933
WDR45	-0.161787	0.0107817	-0.0374934	0.480859
AMEX60DD043838	1.35434	0.0108269	-0.0467353	0.843847
AMEX60DD047124	3.19563	0.0109308	0.778906	0.0823715
RALGAPA2	-0.109765	0.0109418	-0.0195945	0.184269
ARHGAP24	0.149888	0.0109583	0.0408259	0.028894
AMEX60DD055577	-1.01861	0.0109597	0.143742	0.536743
AMEX60DD040955	-0.525004	0.0109899	0.132833	0.444346
SEC62	-0.132025	0.0110143	-0.0200589	0.699322
AMEX60DD047656	-1.52341	0.0110365	-0.45416	0.187872
NUP133	-0.588562	0.0110821	-0.00504183	0.902858
AMEX60DD052919	0.968446	0.0110832	-0.292272	0.281102
GNMT	0.15951	0.0110955	0.0217765	0.690302
TANGO2	-0.0893819	0.0111676	-0.0241059	0.576344
AMEX60DD054597	-0.218866	0.0112419	0.0242174	0.653255
NTRK3	0.136456	0.0112475	-0.0438874	0.023497
ASPA	0.170861	0.0112841	-0.0137704	0.726283
AMEX60DD039870	0.176602	0.0113157	-0.0362567	0.378483
TMEM70	-0.240556	0.0113724	-0.000855109	0.991148
SLC12A6	-0.0961244	0.0114428	-0.0105517	0.668816
GABRA1	0.10526	0.0114845	-0.0414513	0.103952
DNAH3	0.163653	0.0115421	-0.00468106	0.865882
AMEX60DD011621	0.10245	0.0115815	-0.00206219	0.931932
KCNN4	-0.12513	0.0115833	0.0550491	0.245339
AMEX60DD031191	-1.71605	0.0116272	-0.0718263	0.852316
AMEX60DD032920	0.153408	0.0117255	0.0202079	0.781957
AMEX60DD016856	-0.609743	0.0117801	0.0312672	0.862884
AMEX60DD030394	-0.315053	0.0118001	0.0373247	0.624843
PGAP2	0.125665	0.011805	0.0062568	0.83397
AMEX60DD004182	0.164185	0.0119693	-0.0248636	0.522827
AMEX60DD046903	-3.19667	0.0119899	0.142299	0.722315
AMEX60DD013112	-3.19667	0.0119899	0.403236	0.386741
AMEX60DD034610	0.237415	0.0120104	0.270733	0.0975309
NXNL2	0.283948	0.0120153	-0.10071	0.139727
AMEX60DD038794	0.149894	0.0120309	-0.0199603	0.58867
AMEX60DD040488	-2.03798	0.0120631	0.768233	0.103009
AMEX60DD027345	0.216627	0.0120742	0.0340695	0.511664
ITM2C	0.241957	0.012079	-0.0242997	0.685227
SHPRH	0.621817	0.0121032	-0.0799483	0.13585
AMEX60DD056678	0.635104	0.0121358	-0.0728685	0.506445
AMEX60DD033373	0.86891	0.0121588	0.407537	0.0687465
MITF	0.387377	0.0121855	0.0089729	0.751683
AMEX60DD005538	0.565983	0.0121929	-0.0654088	0.643215
AMEX60DD049569	0.29203	0.0123047	-0.0148292	0.823775
AMEX60DD033988	0.254264	0.0123289	-0.0129513	0.840024
DCX	0.178087	0.0123743	-0.0305879	0.393388
AMEX60DD010101	-0.155158	0.0124924	-0.00977222	0.820292
AMEX60DD027248	0.168688	0.0125006	0.0170883	0.811141
AMEX60DD035650	0.527873	0.0125644	-0.187657	0.141106
ALKBH2	-0.333253	0.0125928	-0.0446724	0.682812
AMEX60DD014833	0.191748	0.0126049	-0.027976	0.638026
AMEX60DD054918	3.28296	0.0126747	-3.03185	0.0171767
AMEX60DD039567	3.28296	0.0126747	0.768232	0.465908
AMEX60DD028797	3.28296	0.0126747	-0.38377	0.622328
ACTR8	3.28296	0.0126747	0.0287299	0.632374
AMEX60DD027756	3.28296	0.0126747	-0.483306	0.49664
AMEX60DD006509	3.28296	0.0126748	0.0312672	0.982709
AMEX60DD004955	3.28296	0.0126748	-0.74634	0.27671
AMEX60DD022044	3.28296	0.0126748	0.0312672	0.959463
AMEX60DD027880	3.28296	0.0126748	0.0312672	0.975549
AMEX60DD013212	3.28296	0.0126748	-0.483306	0.49664
AMEX60DD053046	3.28296	0.0126748	-0.968732	0.342311
AMEX60DD002977	3.28296	0.0126748	-0.0166453	0.981782
AMEX60DD037221	3.28296	0.0126749	-0.646804	0.431619
AMEX60DD030743	3.28296	0.0126749	-0.454159	0.590838
AMEX60DD013850	3.28296	0.0126749	0.294302	0.736203
AMEX60DD016225	3.28296	0.0126749	1.2943	0.0919046
DUT	3.28295	0.0126749	0.199087	0.0500897
AMEX60DD025269	0.0978826	0.0127057	0.0299368	0.201131
PCDH10	-0.285487	0.0127147	0.142524	0.145923
JPH2	0.126127	0.0127427	-0.0195281	0.521458
AMEX60DD020550	0.627902	0.0128369	0.147912	0.446741
AMEX60DD028873	0.125811	0.012912	-0.0380933	0.199607
SPTBN5	0.116102	0.0130036	-0.0104953	0.71396
GALNT13	0.107901	0.0130082	-0.0241117	0.57946
AMEX60DD052815	0.254717	0.0130483	-0.0241794	0.688465
SLIT1	0.132173	0.0130929	0.0194227	0.602691
FCN3	0.157995	0.0131151	0.00523153	0.943518
SLC41A1	-0.345215	0.0131425	0.179726	0.0457844
AMEX60DD039144	0.154769	0.0131753	0.0278582	0.634152
LOXL4	0.213553	0.0132277	-0.036275	0.480935
ACTG1	-1.53925	0.0132758	0.309568	0.276128
AMEX60DD011619	0.160608	0.0133783	-0.10521	0.00930055
FBXO9	-0.0826793	0.0133959	-0.0792661	0.00511041
AMEX60DD010864	0.374145	0.0133977	0.0312672	0.705521
FBXW4	0.122487	0.0135212	-0.00834149	0.84534
AMEX60DD016680	-0.803515	0.0135234	-0.113681	0.52656
UBR4	-0.109296	0.0136085	-0.0258	0.210265
UVSSA	0.116266	0.0136128	-0.0194371	0.493043
GNL1	-0.1981	0.0136197	0.0142043	0.780216
AMEX60DD010097	-3.31047	0.0137073	0.938103	0.138154
AMEX60DD007105	-3.31047	0.0137073	-0.499247	0.424849
AMEX60DD030515	-3.31047	0.0137073	-0.258239	0.690449
AMEX60DD027340	-3.31047	0.0137073	-3.03185	0.0171767
AMEX60DD050771	-3.31047	0.0137073	-0.231767	0.790776
AMEX60DD006852	-3.31047	0.0137073	-0.191125	0.811788
AMEX60DD019560	-3.31047	0.0137073	0.156798	0.794579
AMEX60DD010145	-3.31047	0.0137073	-0.411932	0.77704
AMEX60DD033636	-3.31046	0.0137073	-0.302998	0.871763
AMEX60DD056521	-3.31046	0.0137073	0.926507	0.552132
AMEX60DD002445	-3.31046	0.0137074	-0.347244	0.567168
AMEX60DD015914	-3.31046	0.0137074	0.0312672	0.978824
AMEX60DD046088	-3.31046	0.0137074	0.768232	0.465908
PAX2	0.134771	0.0137165	-0.040152	0.494287
DNAJC6	0.191772	0.0137637	-0.0531059	0.1216
AMEX60DD039418	0.139414	0.0137859	0.0215129	0.719155
COX1	0.333969	0.0138721	-0.0651171	0.459128
NRXN1	0.181965	0.0140053	-0.0349489	0.486407
PAF1	0.157987	0.0140318	0.0312672	0.978824
PSRC1	-0.242511	0.0140586	0.0833736	0.306415
AMEX60DD001636	0.188122	0.0141316	-0.0667014	0.415831
GC	0.180796	0.0141536	-0.0976806	0.0299472
AMEX60DD044081	0.131223	0.0141569	-0.118995	0.0850013
AMEX60DD038029	0.319076	0.0141798	-0.0561732	0.583278
MGAT5B	0.0770511	0.0143115	0.00896976	0.743018
ACAP3	0.109686	0.0143173	0.045905	0.45227
GFRA2	0.190427	0.0143267	0.0453748	0.302595
AMEX60DD034928	0.10612	0.0143475	0.0270213	0.30033
MAP2K6	-0.255635	0.0143584	-0.0514354	0.418774
ZNF300	0.139059	0.0143611	0.0473271	0.703355
PTHLH	-0.40627	0.0143705	-0.0206195	0.847648
AMEX60DD037520	-1.80916	0.0143816	0.25366	0.527346
AMEX60DD047357	-1.80916	0.0143817	0.223912	0.548662
ST8SIA6	0.122453	0.0145127	-0.0447072	0.14335
DMAC2	-0.172559	0.0145377	-0.0622142	0.147917
AMEX60DD016000	0.232658	0.0145455	0.0822962	0.175006
CENPC	-0.0921292	0.0146015	-0.0551111	0.0152941
AMEX60DD005458	0.187654	0.014612	-0.00318026	0.944868
CGN	-0.0830224	0.0146132	-0.0421492	0.130353
AMEX60DD000869	0.336689	0.0147809	-0.0178176	0.836517
FAM168B	0.201954	0.0148723	0.00173595	0.973587
AMEX60DD021452	0.355571	0.0149736	-0.0537886	0.552161
FEZF2	-0.495539	0.0149838	0.191844	0.241785
ULK4	0.128766	0.0149994	0.00560529	0.953096
AMEX60DD019304	-2.24656	0.0150497	0.11873	0.738274
MTM1	-0.0851512	0.0150836	0.0125553	0.726693
FYN	0.106896	0.015165	0.0813796	0.00235508
CTNNAL1	0.126384	0.0152168	0.0190831	0.411913
HELLS	-0.13109	0.0153628	-0.0304681	0.365788
TCHP	-0.186545	0.0153967	-0.0842393	0.281449
TRIM72	0.243759	0.0154284	0.0580803	0.499044
AMEX60DD045862	3.05813	0.0154812	-0.290661	0.602927
AMEX60DD012046	3.05813	0.0154813	-0.36105	0.450755
AMEX60DD021928	3.05813	0.0154814	1.15777	0.0326861
ZC2HC1B	-0.241325	0.0155471	0.0620004	0.279335
BTBD1	-0.219943	0.015616	0.0586229	0.296823
ASB6	-0.386087	0.0156232	-0.108851	0.245981
SLC17A9	0.182495	0.0156378	-0.0116906	0.850707
DDB1	-0.123804	0.0157349	-0.0414634	0.217966
AMEX60DD006880	0.291143	0.0157522	-0.046031	0.683187
SLA2	0.22298	0.0157548	-0.0580001	0.303849
TMEM109	0.26696	0.0158383	-0.0130763	0.849356
DNAH11	0.137469	0.0158517	0.014355	0.471298
FSCN2	-0.193535	0.0158552	-0.00167434	0.983215
AMEX60DD000339	0.388778	0.0158599	-0.260196	0.0578454
CEP68	0.192307	0.0158743	-0.102446	0.102784
RFX3	0.0955846	0.0160156	-0.00364596	0.914771
AMEX60DD007560	0.323086	0.0160431	-0.00466989	0.952322
CHCHD10	-0.378527	0.0161033	-0.111758	0.259945
GNA14	-0.097844	0.0161381	-0.0116511	0.643018
AMEX60DD007145	-0.948225	0.0161434	0.111438	0.643166
CUBN	0.118721	0.016222	0.00854228	0.776439
AMEX60DD032390	-0.645663	0.0162732	0.0878508	0.594381
TYR	-0.645663	0.0162732	-0.220272	0.144589
AMEX60DD008533	0.348262	0.0163155	0.124325	0.3373
AADAC	2.19083	0.0163468	-0.0462703	0.314065
AMEX60DD001656	-0.742524	0.0163612	-0.0749382	0.758644
ZGRF1	0.0739947	0.0164499	-0.00187464	0.956616
CDCA3	0.502371	0.0164813	0.0369583	0.773033
AMEX60DD034779	0.170529	0.0165942	-0.042225	0.387115
GRIN2B	0.128091	0.0166101	0.00349722	0.92209
LUZP2	0.101686	0.0166512	-0.026926	0.297924
SLC5A10	0.510456	0.0167579	-0.05148	0.33727
TESPA1	0.153877	0.0169048	-0.0059539	0.840966
AMEX60DD025754	0.146984	0.0169659	-0.0652161	0.198545
FHL1	0.138532	0.0170634	0.0113104	0.823442
FASTKD1	-0.111991	0.0170654	-0.0306292	0.430895
AMEX60DD021482	0.246776	0.0170829	0.0298602	0.732259
AMEX60DD044578	-1.63359	0.0171005	-0.343128	0.353126
ATOH8	-0.292424	0.0171334	-0.065145	0.38744
GPS2	-0.32994	0.0172185	0.0428088	0.638952
ADCYAP1	-0.360824	0.0172393	0.107348	0.570761
NGLY1	0.141513	0.0172653	-0.0320307	0.371868
AMEX60DD045440	0.415738	0.0172669	0.0101256	0.956567
BPI	0.157207	0.017292	0.010683	0.850309
TTLL4	-0.0977422	0.0173267	-0.00980647	0.646032
TRA2B	-0.919585	0.0173466	0.25366	0.254509
AMEX60DD032650	-0.919585	0.0173466	-0.0465562	0.88722
AMEX60DD036920	-0.327232	0.0173686	0.132196	0.100461
AMEX60DD038690	-1.00556	0.0173735	-0.180237	0.572665
TSPAN2	0.13293	0.0174428	0.0428073	0.206482
RNF123	-0.0802009	0.0174587	-0.0279004	0.361127
AMEX60DD020613	0.313129	0.0174792	-0.0821146	0.300798
KIAA1549L	0.213912	0.0174962	-0.0516662	0.0581302
MMAB	-0.2211	0.0175238	0.0429231	0.627742
MCHR2	0.0637544	0.0175906	-0.058339	0.0969963
AMEX60DD035437	0.195543	0.0176378	0.0512012	0.29562
AMEX60DD034015	-0.270742	0.0176512	-0.0329363	0.632787
ADHFE1	0.137447	0.0177165	-0.0118939	0.81042
PAH	-0.182291	0.0177359	-0.0182419	0.717995
AMEX60DD049279	0.482555	0.0177998	-0.0135432	0.95028
IQGAP1	-0.144863	0.0178177	0.0135137	0.803349
WDR3	-0.505485	0.0178232	0.0700517	0.251428
B3GALT2	-1.95948	0.0178386	0.157946	0.730709
MYRFL	0.204622	0.0178413	-0.0502044	0.172094
AQP4	0.169202	0.0178629	-0.0043055	0.91188
ELP4	-0.0669104	0.0178897	-0.0089688	0.694447
EIF3D	-0.210878	0.0179727	0.0671327	0.230627
TBL2	-0.211491	0.0180796	0.0752449	0.187157
KCNJ2	-0.407214	0.0181111	0.0879991	0.399636
NT5DC3	-0.1004	0.018195	-0.0737292	0.188394
AMEX60DD040275	-1.08218	0.018347	0.181014	0.466655
AMEX60DD012206	-1.08218	0.018347	0.204599	0.479065
UBXN11	0.176209	0.018368	0.0498032	0.709153
AMEX60DD038186	-3.02674	0.0183773	1.09016	0.0314233
AMEX60DD055417	-3.02674	0.0183773	0.0280504	0.962863
AMEX60DD054636	-3.02674	0.0183773	0.105268	0.819832
AMEX60DD056030	-3.02674	0.0183773	-1.45416	0.0530292
MTDH	-0.141005	0.0183803	-0.00511083	0.887106
SYK	0.121125	0.0184175	-0.0125749	0.684618
AMEX60DD017947	0.135925	0.0184207	-0.0732887	0.0338859
CYRIB	0.0981438	0.0184376	-0.0260756	0.57765
PKD1	0.186037	0.0184486	-0.032314	0.123479
MRRF	-0.759121	0.0185098	0.0112131	0.877403
ABRAXAS1	-1.35348	0.0185343	-0.101318	0.0889143
AMEX60DD013657	-1.35348	0.0185343	-0.231767	0.790776
ENPP3	-0.0987234	0.0186863	-0.0405916	0.113692
AMEX60DD002255	0.349239	0.0186981	0.077471	0.48165
AMEX60DD029748	1.39247	0.0186992	0.10282	0.695159
UBE2J2	0.170871	0.0187752	-0.0264784	0.48672
AMEX60DD013270	2.56928	0.0187976	-0.646805	0.115754
ZFAND6	-0.125169	0.0189894	-0.0610613	0.0735137
AMEX60DD046580	0.687072	0.0190217	-0.263354	0.125315
CFAP58	0.0922954	0.0191357	0.0406185	0.214635
AMEX60DD042738	0.41106	0.0191611	0.0390656	0.712648
AMEX60DD038858	0.186787	0.0191755	0.0113377	0.803801
CAVIN2	0.282504	0.0192859	0.139236	0.0297263
AMEX60DD028577	0.731407	0.0193228	0.18922	0.294783
AMEX60DD056588	0.125579	0.0194018	-0.0975376	0.179427
AMEX60DD012575	-0.279953	0.0194096	-0.083141	0.262588
MARCHF1	0.0868825	0.019411	-0.0599369	0.176205
ITGB7	0.116689	0.0194766	0.0312672	0.3168
PKN2	0.116689	0.0194767	-0.0613178	0.0452747
AMEX60DD022776	-2.59052	0.0194969	-0.161378	0.708144
AMEX60DD002697	-2.59052	0.0194969	1.62902	0.0853747
TMEM248	0.16935	0.0195422	0.0372604	0.395307
AMEX60DD027773	0.377102	0.0195446	0.135246	0.258046
CCDC110	-0.260373	0.0196262	-0.0499016	0.420743
ELL2	-0.149632	0.0196782	-0.131162	0.0168829
PALD1	0.0802938	0.0197399	0.00362153	0.862668
HSPG2	-0.128968	0.0197478	-0.011747	0.773443
AMEX60DD034257	-0.868055	0.0197884	-0.167363	0.527896
AMEX60DD022876	-0.868055	0.0197884	0.113084	0.734785
ACSS1	0.194458	0.0199113	-0.0391016	0.260791
GRIK1	0.129775	0.0199227	-0.0305913	0.353794
AMEX60DD055723	0.698985	0.02004	-0.0806257	0.6538
HTRA3	0.153294	0.0200666	0.0380493	0.530817
AMEX60DD039181	0.213558	0.0200677	0.00619109	0.926486
FGF13	0.105297	0.020078	-0.0746709	0.0290946
ANGPTL1	-1.49366	0.0201094	-0.0384063	0.597551
AMEX60DD013290	-1.49366	0.0201094	0.329532	0.464893
NEGR1	0.302369	0.0201261	-0.0272611	0.450691
GUCY2D	-0.409806	0.020184	0.033854	0.850409
AMEX60DD006047	0.583933	0.0201869	-0.456179	0.0146974
AMEX60DD002123	0.260286	0.0202177	0.0607341	0.288225
AMEX60DD033398	0.238811	0.0202409	-0.0396629	0.619997
AMEX60DD043689	0.168408	0.0203047	-0.0977773	0.00791989
AMEX60DD044415	0.359897	0.0203546	0.00045985	0.997156
AMEX60DD045214	0.483993	0.0203792	-0.128604	0.463801
SLC9A4	0.115034	0.0203971	-0.0427333	0.147014
GGN	0.0910556	0.0204549	-0.047853	0.11706
AMEX60DD044061	0.229423	0.0204551	-0.038195	0.668892
UPF1	-0.0898896	0.0204999	-0.0748373	0.00197036
PLA2G4C	-0.292882	0.0205211	0.038594	0.545739
SHANK2	0.0756605	0.0205968	0.0193062	0.6683
MYOF	-0.0853761	0.0206111	-0.0460298	0.0338834
IDE	-0.0911403	0.0206208	-0.0261371	0.382618
AMEX60DD022066	-0.19522	0.0206846	0.217134	0.32609
RBFOX2	-0.115521	0.0207558	-0.0338575	0.271837
AMEX60DD006487	0.491347	0.0207931	0.113966	0.29691
AMEX60DD030009	0.235527	0.020798	-0.0545642	0.369611
AMEX60DD043340	-1.13109	0.0209954	0.141194	0.693614
CWC27	0.0840216	0.0210098	-0.00960808	0.673401
AMEX60DD006610	0.177998	0.0210391	-0.000260131	0.99554
DBI	-0.462296	0.0210778	-0.0393274	0.792517
GATA5	0.212367	0.0210863	0.0793291	0.406512
GCFC2	-0.132257	0.021119	0.0148417	0.711333
SLC47A1	0.113566	0.0212119	0.0181592	0.651603
SREBF1	-0.171354	0.0212429	-0.0141411	0.758394
SPEN	0.406283	0.0212545	-0.0325737	0.225611
SEC63	-0.243163	0.0213592	0.000718703	0.98565
TMEM106B	0.211672	0.0213768	0.0720622	0.402956
RTCB	-0.184612	0.0213826	0.047606	0.326827
AMEX60DD005368	0.267828	0.0214263	-0.02447	0.734089
GAS1	0.23519	0.0214927	0.013043	0.864507
VASN	-0.392288	0.0215711	0.123296	0.26191
AMEX60DD020942	0.425304	0.0216161	0.0199519	0.848328
AMEX60DD049949	0.28245	0.021619	-0.155018	0.040643
DGKI	0.0812186	0.0217205	0.00580258	0.808641
AMEX60DD020976	0.177473	0.0217427	-0.00923463	0.838406
CCM2	-0.125876	0.0217456	-0.0563934	0.100251
NAALADL1	0.189266	0.0217482	-0.0264666	0.606814
FAM167A	-0.269047	0.0217516	-0.0053119	0.955675
AMEX60DD041855	0.946913	0.0217977	0.426127	0.101877
AMEX60DD041778	0.484767	0.0218106	-0.0366368	0.774367
POU3F1	-0.997823	0.0219212	0.483779	0.116125
CAAP1	0.141282	0.0219263	-0.0339744	0.518164
HMMR	-0.127849	0.0220234	0.0642676	0.05931
TJP1	-0.0755876	0.0220338	-0.0129707	0.526098
BRAP	-0.126834	0.0220704	0.0177935	0.604177
SYNE1	-2.13109	0.0221139	-0.0336535	0.115896
AMEX60DD001115	0.726891	0.0221355	-0.0704532	0.738433
VWC2L	0.111216	0.0222039	-0.00338692	0.934726
AMEX60DD027436	0.655507	0.0222334	-0.239262	0.120869
AMEX60DD044719	0.655507	0.0222334	-0.126685	0.483028
HEATR3	0.147073	0.0222918	0.0333304	0.387608
AMEX60DD000715	0.250257	0.0223113	-0.083884	0.098725
PKD2L1	-0.0972017	0.0223635	-0.00294984	0.909377
AMEX60DD040587	2.90613	0.0223657	0.389868	0.652424
AMEX60DD030431	2.90613	0.0223658	0.796802	0.165791
AMEX60DD047442	2.90613	0.0223659	-1.12627	0.0193395
AMEX60DD027833	2.90613	0.0223659	-0.608507	0.40082
AMEX60DD034968	0.176154	0.0224461	-0.0165093	0.771924
DHX58	-0.312474	0.0224573	-0.0506274	0.549753
ANKRD52	-0.0723098	0.0224755	-0.0234004	0.496896
AMEX60DD051843	-0.551933	0.0226614	-0.0118015	0.934649
PIWIL2	-0.0845255	0.0226761	0.00560655	0.746581
AMEX60DD053108	2.0913	0.0226986	-0.612589	0.18475
AMEX60DD022759	2.0913	0.0226986	-0.757229	0.0500887
GIPC3	0.205541	0.0227659	-0.0441911	0.228152
MMP28	0.810016	0.0228221	0.0173177	0.659837
FAAP100	-0.115119	0.022897	0.0132463	0.787041
AMEX60DD033210	0.577861	0.0229001	-0.0206606	0.88771
TMA16	0.106322	0.0229179	0.06167	0.328775
AMEX60DD048919	0.113438	0.0229395	-0.043065	0.15856
CFL2	-0.143509	0.0229481	-0.0387703	0.477054
AMEX60DD026139	0.2542	0.0229864	-0.0259983	0.782933
ST7	-0.114381	0.0231706	-0.00809318	0.790826
HECW1	0.13347	0.0232226	-9.2e-05	0.997973
TTC34	0.105144	0.0232358	-0.0615576	0.0244647
PLEKHO2	0.187168	0.0232951	0.0593117	0.479054
PRPF40A	-1.37902	0.0233318	-0.0312691	0.523868
AMEX60DD012492	0.251116	0.0233397	0.00366581	0.970167
CXADR	0.159271	0.023343	-0.0447817	0.295107
NFKBIA	1.53187	0.0233647	0.200645	0.64279
KY	0.116996	0.0234133	-0.0468917	0.185583
NCOR2	-0.113616	0.0234688	-0.0167432	0.630179
CRMP1	0.168877	0.0235849	0.0127587	0.736226
LRRK1	0.221897	0.023631	-0.0108179	0.70194
AMEX60DD046913	-0.189291	0.02366	0.0678516	0.317091
FOXA1	-0.205531	0.0237728	0.0150006	0.878083
TSPAN8	0.109782	0.0238007	-0.0159021	0.689996
AMEX60DD004206	-1.19522	0.0238259	-0.124852	0.71013
KCNQ5	0.0999642	0.0238662	0.0373367	0.382284
DLX3	-0.462711	0.0239076	0.216823	0.117387
PRDM9	0.255933	0.0239214	0.000206634	0.992896
AMEX60DD048530	0.640641	0.023947	0.0186011	0.924939
PPARGC1B	-0.197098	0.0239616	0.117936	0.0287862
AMEX60DD024237	0.224214	0.0239649	-0.297059	0.011593
AMEX60DD018092	-0.428072	0.0239783	-0.0485118	0.676834
XKR5	-0.190185	0.0240693	0.00523484	0.961343
ARHGEF10	0.0768571	0.0241759	0.0266969	0.202903
CIBAR2	-0.323735	0.0242644	-0.0385348	0.51324
AMEX60DD025270	-0.358896	0.0242895	0.216437	0.0313412
AMEX60DD052332	0.582606	0.0244086	-0.0157303	0.923911
GOPC	-0.118582	0.0244109	-0.0315928	0.310461
ZC3HC1	-0.13109	0.0244682	-0.0154404	0.666512
ABCG2	0.211694	0.0245322	0.0232449	0.417242
AMEX60DD043503	3.01993	0.0245425	-1.29066	0.284947
AMEX60DD031469	3.01993	0.0245425	0.294302	0.633769
AMEX60DD041558	3.01993	0.0245425	0.201192	0.774114
AMEX60DD016813	3.01993	0.0245425	-0.968733	0.342311
AMEX60DD009141	3.01993	0.0245425	0.000291653	0.999884
AMEX60DD052814	3.01993	0.0245425	-0.161378	0.759867
AMEX60DD020843	3.01993	0.0245425	-0.0682684	0.898673
AMEX60DD037192	3.01993	0.0245426	0.54584	0.277589
AMEX60DD051054	3.01993	0.0245426	-0.705698	0.502985
AMEX60DD018437	3.01993	0.0245426	1.009	0.350731
AMEX60DD049411	3.01993	0.0245426	0.0312672	0.978824
AMEX60DD019403	3.01993	0.0245426	1.03127	0.0987782
AMEX60DD014329	3.01993	0.0245426	0.0378966	0.96035
AMEX60DD014331	3.01993	0.0245427	0.294302	0.633769
AMEX60DD015110	3.01993	0.0245427	1.99389	0.620689
AMEX60DD041609	3.01993	0.0245427	-1.10624	0.155126
AMEX60DD048874	3.01993	0.0245427	-0.968732	0.272854
AMEX60DD008597	3.01993	0.0245427	0.0312672	0.967658
AMEX60DD005494	3.01993	0.0245427	0.0312672	0.961348
EIF4A1	3.01993	0.0245427	-0.0421682	0.412683
AMEX60DD044411	3.01993	0.0245427	0.709339	0.388436
AMEX60DD051284	3.01993	0.0245427	0.792145	0.662828
AMEX60DD047133	3.01993	0.0245427	0.0312672	0.975549
AMEX60DD004136	3.01993	0.0245427	-0.968732	0.220222
AMEX60DD002759	3.01992	0.0245427	1.39384	0.0300852
AMEX60DD039897	3.01992	0.0245428	-0.231767	0.790776
AMEX60DD027326	3.01992	0.0245428	-0.0878837	0.935444
AMEX60DD027973	3.01992	0.0245428	-0.38377	0.622328
AMEX60DD051776	3.01992	0.0245428	0	1
AMEX60DD020789	3.01992	0.0245428	-1.10624	0.155126
AMEX60DD005892	3.01992	0.0245428	0.796802	0.165791
AMEX60DD017066	3.01992	0.0245428	-0.0340912	0.983982
AMEX60DD027531	3.01992	0.0245428	0.41829	0.43132
AMEX60DD048441	3.01992	0.0245428	0.61623	0.34937
AMEX60DD033529	3.01992	0.0245428	0.731707	0.259034
GAS8	3.01992	0.0245429	0.00540758	0.883282
AMEX60DD020839	3.01992	0.0245429	-0.0942636	0.875617
AKAP4	0.1774	0.0245885	-0.0315461	0.711143
CEP112	-0.069089	0.024751	-0.0020476	0.935917
HUWE1	-0.0685086	0.0247571	-0.0131912	0.425637
AMEX60DD051882	1.07536	0.0247808	-0.335515	0.281977
ANKRD65	0.176124	0.0248265	0.0867564	0.320016
ENTPD7	0.126905	0.0248325	0.000947269	0.983983
PRRC2C	0.0729498	0.0249548	-0.01895	0.622166
RPL32	-1.0557	0.0249704	0.164021	0.615054
RWDD4	-0.22695	0.0249964	0.0231393	0.711299
LIN9	-0.0817426	0.0250531	0.0113564	0.759889
FBRSL1	-0.176011	0.0250778	-0.0230253	0.63653
AMEX60DD030260	-0.415819	0.0250789	-0.0274854	0.783162
GRAP	-0.164949	0.0251651	0.0107254	0.809328
UBALD2	-0.200799	0.0252077	-0.0570884	0.41866
PKD2	0.172893	0.0252489	0.0845259	0.069271
RAB9A	0.163609	0.0253197	-0.0359457	0.426365
AMEX60DD020563	-0.307167	0.0253208	-0.194575	0.0217531
ITGA4	0.0935409	0.0253228	0.0179704	0.470056
NCAPD2	0.124867	0.0253724	-0.0368855	0.276819
RORC	0.167134	0.0254056	0.0660683	0.15292
AMEX60DD035506	0.268243	0.0254318	-0.036964	0.540492
AMEX60DD013656	-1.03155	0.0254409	-0.700537	0.00409471
NT5E	0.123297	0.0255501	0.0605637	0.221137
DZIP1L	0.109709	0.0255951	0.0158806	0.522488
AMEX60DD008646	2.4538	0.0256477	0.641799	0.397332
AMEX60DD045484	2.4538	0.0256477	-0.519424	0.45866
AMEX60DD054015	2.4538	0.0256477	0.0926678	0.825772
LMF2	-0.147821	0.0256611	0.0461569	0.432106
SLC35E1	-0.187195	0.0256812	0.0176182	0.730971
AMEX60DD020633	0.190838	0.0256847	-0.0380312	0.50314
AMEX60DD032003	1.32834	0.0257384	0.0481422	0.945622
AMEX60DD010086	-0.234594	0.0257726	0.131395	0.0409105
ZCCHC24	0.135678	0.0257908	-0.0143962	0.702135
AMEX60DD023578	0.148896	0.0258714	-0.0318721	0.50679
UBE2G1	-0.127675	0.0258892	-0.019668	0.663852
STOML2	-0.149928	0.0259055	-0.0710607	0.0864565
CCNH	-0.132313	0.0259332	-0.0201928	0.744719
AMEX60DD007388	-0.702246	0.0259916	0.162512	0.360621
EDNRA	-0.173032	0.0261315	-0.0452637	0.360937
AMEX60DD044374	0.688338	0.0262369	-0.0633696	0.731691
AMEX60DD032031	-0.831529	0.0263087	1.8883	0.225596
AMEX60DD036429	-1.83153	0.0263967	0.211839	0.472794
AMEX60DD048702	0.326761	0.0264272	0.189574	0.798524
AMEX60DD025243	-1.13109	0.0265876	-0.00720692	0.982744
AMEX60DD032254	-1.28309	0.0267087	0.363843	0.166481
NAT8L	0.205391	0.0267208	-0.00875462	0.908282
CRHBP	0.209401	0.0267256	0.032806	0.704677
LIMS1	-0.162558	0.0268971	-0.00122729	0.971404
AMEX60DD000094	0.483861	0.0269435	0.0381102	0.784501
TM4SF5	0.185425	0.0269739	-0.0382011	0.760147
TPCN2	0.107924	0.0269765	-0.0644706	0.0333912
TEKT1	0.399425	0.0269851	-0.0865395	0.18183
AMEX60DD039387	0.399425	0.0269851	-0.108136	0.313492
AMEX60DD033923	0.911073	0.0270192	0.0312672	0.880644
TJAP1	0.126607	0.0270365	0.0631657	0.0214709
AMEX60DD044872	0.171724	0.0270935	0.0510938	0.151865
GABRA5	0.0901487	0.027136	-0.0354388	0.144167
AMEX60DD017939	-0.166519	0.0271399	0.645614	0.00173395
RRM2	0.211252	0.0271916	0.223912	0.764266
RAB33B	0.179169	0.0272487	-0.171362	0.0511122
TTF1	0.279194	0.027289	-0.00664077	0.920034
ACTR3B	0.092617	0.0273144	-0.0119503	0.755711
GAS2L3	0.604505	0.0273768	0.112951	0.420393
AMEX60DD036776	2.22192	0.0273784	0.472558	0.357958
AMEX60DD051659	1.19084	0.0273808	0.234084	0.387551
PLEKHH1	0.120003	0.0274061	-0.00215868	0.947719
LRRC32	0.222066	0.0276489	0.0168642	0.748674
LMO1	0.1508	0.0276566	-0.000227071	0.995026
AMEX60DD032278	-0.534445	0.0277252	0.0425825	0.813693
AMEX60DD040918	0.442645	0.0277688	-0.00427976	0.981872
AHNAK	-0.22657	0.0277894	-0.106937	0.100885
AMEX60DD010843	-0.386347	0.0278294	0.0512178	0.850862
SLC2A11	0.757879	0.0278342	0.0178359	0.734403
USP9X	-0.0899418	0.0278575	-0.0137885	0.591473
AMEX60DD028521	-0.167109	0.0278712	0.272275	0.645031
USP10	-0.0941936	0.0279171	-0.0431714	0.223016
BEGAIN	0.106973	0.0280359	0.0210516	0.50906
AMEX60DD015341	-2.45301	0.0281577	-0.730573	0.054086
AMEX60DD012480	-2.45301	0.0281577	-0.509301	0.367423
AMEX60DD050612	-2.45301	0.0281577	-0.248841	0.632708
AMEX60DD005828	0.188564	0.0281658	0.0395999	0.71965
TEK	0.110137	0.0283776	0.00123842	0.970551
AMEX60DD020941	0.422846	0.0284064	0.0446877	0.694075
AMEX60DD046919	-0.731482	0.0284265	0.114944	0.703138
MAP3K9	0.213228	0.028528	0.0326302	0.461822
AMEX60DD007905	0.172631	0.0285695	-0.104843	0.0261417
AMEX60DD026151	0.488306	0.028659	0.0955882	0.390225
AMEX60DD038325	0.249463	0.0286623	-0.0308773	0.559723
AMEX60DD006529	0.164286	0.0287909	0.0676871	0.302101
GADD45GIP1	-0.566027	0.0288271	-0.0217603	0.91681
ROR1	0.113172	0.0289017	0.0516802	0.031509
NRG3	1.38348	0.0289884	-0.0545242	0.127049
SCAMP4	1.38348	0.0289885	-0.120213	0.0424109
AMEX60DD044701	-2.8341	0.029009	-0.760208	0.133438
AMEX60DD040516	-2.8341	0.029009	-0.347244	0.567168
AMEX60DD026365	-2.8341	0.029009	-0.0907233	0.79124
AMEX60DD008067	-2.8341	0.029009	-0.38377	0.4361
AMEX60DD020007	0.779643	0.0290283	-0.0544627	0.788584
SACM1L	-0.118014	0.0290471	-0.0401015	0.180611
EPHA1	-0.181547	0.029245	-0.0248446	0.719522
AMEX60DD045216	-0.868055	0.0292701	0.266895	0.284095
AMEX60DD042717	-0.868055	0.0292701	-0.123455	0.651155
AMEX60DD047597	-0.788202	0.0293142	-0.0530778	0.848385
MEX3D	-0.370428	0.0293508	-0.0721307	0.669707
AMEX60DD040858	-1.07451	0.0293962	-0.489565	0.21156
AMEX60DD042573	-1.07451	0.0293962	0.149104	0.609257
AMEX60DD002913	-1.4112	0.0293973	0.051387	0.91919
AMEX60DD050120	0.473501	0.029405	-0.209202	0.22445
SLC39A13	0.180269	0.0295056	0.0131427	0.797168
EHD3	-0.13109	0.0296256	-0.0253892	0.487998
GLI3	0.120036	0.0296655	0.0694469	0.125076
TRPC7	0.118631	0.0297314	-0.0157739	0.427184
AMEX60DD033888	-0.26961	0.0297914	0.0378101	0.633626
ELFN2	0.0928616	0.0298413	-0.0152651	0.715666
VPS13C	-0.0691652	0.0299764	-0.0231705	0.114093
CFP	0.135639	0.0300509	-0.0161995	0.637353
SEMA3G	-0.156275	0.030079	-0.0108582	0.809378
AMEX60DD018496	0.163962	0.0300959	0.0758045	0.0834978
PPFIBP2	0.0893585	0.0301727	0.0468884	0.0111695
NR5A2	0.116324	0.0302228	-0.0326747	0.327118
ZNF185	-0.13373	0.0302391	-0.0207756	0.579226
AMEX60DD027365	-2.98854	0.030494	0.0312672	0.957662
AMEX60DD017564	-2.98854	0.030494	-0.968733	0.220222
AMEX60DD039911	-2.98854	0.0304941	1.35319	0.112865
AMEX60DD049971	-2.98854	0.0304941	0.353195	0.715148
AMEX60DD005640	-2.98854	0.0304941	0.258209	0.800477
AMEX60DD045362	-2.98854	0.0304941	0.358471	0.778662
AMEX60DD013958	-2.98854	0.0304941	0.596719	0.704912
AMEX60DD028447	-2.98854	0.0304941	0.320774	0.620824
AMEX60DD048621	-2.98854	0.0304941	0.0312672	0.967658
AMEX60DD056453	-2.98854	0.0304941	0.0312672	0.96333
AMEX60DD040370	-2.98854	0.0304941	-0.268293	0.618453
AMEX60DD035423	-2.98854	0.0304941	0.54584	0.44264
AMEX60DD053822	-2.98854	0.0304941	-0.182858	0.642347
AMEX60DD028243	-2.98854	0.0304941	-0.120736	0.855473
AMEX60DD017618	-2.98854	0.0304941	0.337872	0.731997
AMEX60DD039178	-2.98854	0.0304941	-1.66917	0.0430212
AMEX60DD009303	-2.98854	0.0304941	0.709339	0.388436
AMEX60DD017337	-2.98854	0.0304941	0.0312672	0.96333
AMEX60DD034841	-2.98854	0.0304941	-1.19112	0.231523
AMEX60DD004847	-2.98854	0.0304941	-0.109126	0.90873
AMEX60DD014284	-2.98854	0.0304941	1.20119	0.165889
AMEX60DD026216	-2.98854	0.0304941	-0.705698	0.502985
AMEX60DD020482	-2.98854	0.0304941	0.201192	0.774114
AMEX60DD009401	-2.98854	0.0304941	-0.968733	0.220222
AMEX60DD013767	-2.98854	0.0304941	-0.138658	0.731908
AMEX60DD009441	-2.98854	0.0304941	1.51147	0.29479
AMEX60DD020955	-2.98854	0.0304942	0.0312672	0.948159
AMEX60DD038648	-2.98854	0.0304942	0.446305	0.685448
AMEX60DD052799	-2.98854	0.0304942	-0.290661	0.671028
AMEX60DD011257	-2.98854	0.0304942	1.04195	0.437055
AMEX60DD037027	-2.98854	0.0304942	1.03068	0.307369
AMEX60DD047042	-2.98854	0.0304942	-0.968732	0.272854
AMEX60DD050504	-2.98854	0.0304942	-0.106236	0.866164
AMEX60DD013081	-2.98854	0.0304942	-0.968732	0.179289
AMEX60DD009551	-2.98854	0.0304942	0.616229	0.508151
AMEX60DD010186	-2.98854	0.0304942	0.986471	0.537589
AMEX60DD048088	-2.98854	0.0304942	0.0312672	0.978824
AMEX60DD054544	-2.98854	0.0304942	0.25366	0.751979
AMEX60DD043527	-2.98854	0.0304942	-0.861817	0.202583
AMEX60DD039884	-2.98854	0.0304942	1.03127	0.191867
AMEX60DD015469	-2.98854	0.0304942	2.73386	0.0351921
AMEX60DD029636	-2.98854	0.0304942	0	1
AMEX60DD026252	-2.98854	0.0304942	-0.231767	0.707516
AMEX60DD042359	-2.98854	0.0304942	0.0312672	0.972664
AMEX60DD044858	-2.98854	0.0304942	-0.553694	0.674176
AMEX60DD008411	-2.98854	0.0304942	-0.290661	0.763922
AMEX60DD024332	-2.98854	0.0304942	1.03127	0.31206
AMEX60DD005385	-2.98854	0.0304942	1.2943	0.0919046
AMEX60DD029219	-2.98854	0.0304942	0.168771	0.788901
AMEX60DD043050	-2.98854	0.0304942	0.926508	0.552132
AMEX60DD047271	-2.98854	0.0304942	0.0312672	0.978824
AMEX60DD016157	-2.98854	0.0304942	0.353195	0.715148
AMEX60DD013924	-2.98854	0.0304942	-1.29066	0.284947
CCNB1IP1	-2.98854	0.0304942	0.0515285	0.214003
UBE2I	-2.98854	0.0304942	-0.0527355	0.27024
AMEX60DD007668	-2.98854	0.0304942	-0.509301	0.367423
AMEX60DD011868	-2.98854	0.0304942	-0.36105	0.450755
AMEX60DD013516	-2.98854	0.0304942	0.616229	0.639852
AMEX60DD035981	-2.98854	0.0304942	-0.290661	0.671028
AMEX60DD037642	-2.98854	0.0304942	0.294302	0.633769
AMEX60DD017138	-2.98854	0.0304942	0.768233	0.302457
AMEX60DD053452	-2.98854	0.0304942	0.0312672	0.96333
AMEX60DD031372	-2.98854	0.0304942	-2.18386	0.103947
AMEX60DD033226	-2.98854	0.0304942	0.0312672	0.978824
AMEX60DD037677	-2.98854	0.0304942	1.51147	0.29479
AMEX60DD045668	-2.98854	0.0304942	-0.776087	0.390749
AMEX60DD052916	-2.98854	0.0304943	-0.553695	0.552132
AMEX60DD017803	-2.98854	0.0304943	1.8883	0.225596
AMEX60DD009485	-2.98854	0.0304943	-1.44689	0.315903
AMEX60DD053245	-2.98854	0.0304943	1.51147	0.29479
GRIN2A	0.0685673	0.0305589	0.0345677	0.139951
RASSF3	-0.0914427	0.0305623	0.0798993	0.0953272
ESPL1	-0.0913916	0.030763	-0.043901	0.286152
AMEX60DD007176	0.321082	0.0307958	-0.125834	0.17817
AMEX60DD022937	-0.76852	0.0308079	-0.0210052	0.922825
DPP7	0.135157	0.0309112	-0.0164084	0.691983
RTN4	0.113599	0.0309304	0.0187302	0.780069
NUCB2	-0.113754	0.030938	-0.0605491	0.307597
AMEX60DD033797	0.106892	0.0309777	-0.0430541	0.192236
AMEX60DD027270	0.232996	0.0309998	-0.0325333	0.619092
BRPF1	0.117071	0.0311006	0.00361865	0.947694
AMEX60DD037690	1.22255	0.0311408	0.490699	0.30058
TMEM47	0.834145	0.0311908	-0.00954567	0.810895
AMEX60DD008553	0.3293	0.0311934	0.101566	0.164565
HMG20B	0.22183	0.0312174	0.0988498	0.124943
BRK1	-0.350656	0.031233	-0.0546106	0.598902
SULF1	0.133892	0.0312382	0.0955058	0.0108264
BRD4	-0.104981	0.0312474	-0.0885055	0.0571232
FAM135B	0.0784752	0.0313092	-0.0404485	0.0898338
AMEX60DD048453	0.199436	0.0314099	0.0571691	0.640077
NOSTRIN	0.131981	0.0314475	-0.0771194	0.00940287
AMEX60DD016224	-1.61652	0.0315007	0.0312672	0.930917
AMEX60DD013989	-1.61652	0.0315007	0.467366	0.311136
KHDRBS3	0.121312	0.0315265	-0.0603438	0.0784168
DDR1	-0.211633	0.0315471	0.0263391	0.658661
CTTNBP2NL	-0.174431	0.0315644	0.0512671	0.316836
ARHGEF6	-0.108245	0.0315737	-0.0200273	0.381456
AMEX60DD022722	1.98438	0.0317567	0.130803	0.807247
C3AR1	0.204052	0.0318115	-0.0534064	0.330976
ATAT1	0.170429	0.0318403	-0.198095	0.0577166
COX3	0.27893	0.0318438	-0.116296	0.348093
STK32B	0.107665	0.0318568	-0.0378612	0.223796
AMEX60DD037900	0.400523	0.0319471	-0.0916943	0.44175
AMEX60DD056425	-0.170498	0.0319509	-0.0180197	0.70676
AMEX60DD020458	0.345348	0.0319574	1.22391	0.00810895
PDE10A	0.0803666	0.0319924	0.0533886	0.0168148
UBE2U	0.101446	0.0320308	0.00291825	0.917926
AMEX60DD051959	0.199515	0.0321287	-0.0656337	0.216992
AMEX60DD002315	-1.02417	0.0322329	0.212511	0.568344
SNRPD1	-0.489137	0.0322614	0.235198	0.0992678
ACY1	0.134171	0.0322703	-0.0835811	0.116494
DBX1	-0.749999	0.0322924	-0.107254	0.654015
EPRS1	-0.0809689	0.0323918	-0.0331575	0.305346
AMEX60DD051733	1.10992	0.0324404	-0.0135854	0.97154
SERINC2	-0.149793	0.0324722	0.0429071	0.320559
AMEX60DD000818	-0.574696	0.0324949	0.00878321	0.952374
AMEX60DD016375	1.45387	0.0325365	0.455075	0.126318
KLHL4	0.117016	0.0325763	0.073363	0.0190851
AMEX60DD011775	-0.52798	0.03259	-0.0602311	0.697532
AMEX60DD048553	-2.00556	0.0328188	-0.167457	0.619163
SCN8A	0.0650814	0.0328987	-0.000306013	0.986932
EFCAB10	0.171406	0.0330242	0.0158977	0.74211
AMEX60DD050975	2.73621	0.0330399	0.0312672	0.965426
AMEX60DD035702	2.73621	0.0330399	-0.38377	0.546341
AMEX60DD032046	2.7362	0.03304	0.61623	0.639852
AMEX60DD050647	2.7362	0.0330401	0.556966	0.530483
AMEX60DD003935	2.7362	0.0330402	0.409779	0.499499
JKAMP	2.7362	0.0330402	-0.0501679	0.227579
PSMD11	-0.0862592	0.0330452	-0.0453441	0.231921
AMEX60DD017590	-0.271815	0.0330781	0.526032	0.19089
CEP55	-0.107964	0.0330832	0.0622225	0.0446749
AMEX60DD041290	-0.256621	0.0331188	-0.0379356	0.605647
AMEX60DD031206	0.173886	0.0331874	-0.0281692	0.55324
AMEX60DD001095	0.436385	0.0332227	0.0205235	0.900149
AMEX60DD008190	0.272581	0.0332363	-0.0944402	0.217225
AMEX60DD020562	-0.674232	0.0332425	-0.125458	0.48557
PPM1H	-0.130482	0.0332685	0.0471196	0.346099
KIF16B	-0.22471	0.0333533	-0.00635622	0.895907
FREM1	0.0813281	0.0333672	-0.00816083	0.79658
AMEX60DD050806	0.711369	0.0333749	-0.255037	0.14615
BARX1	-0.439842	0.0333889	0.0970217	0.504062
TPD52L1	-0.103298	0.0334262	-0.0400515	0.16891
AMEX60DD029415	0.613071	0.0334427	-0.378124	0.113268
EFCAB11	-0.0832614	0.0334975	0.0136308	0.725189
TMEM200C	0.118122	0.0335404	-0.0429688	0.215574
ERBIN	-0.0653156	0.0335674	0.0245232	0.435935
AMEX60DD021963	0.592393	0.0335919	0.194326	0.289642
KLF3	-0.221053	0.0335999	0.0460642	0.480829
AMEX60DD003016	0.453873	0.0336344	-0.0875189	0.473663
AMEX60DD044452	0.1861	0.0338036	0.0944335	0.0702508
AMEX60DD023213	-1.30101	0.0338144	0.116156	0.740024
RAD21	0.14246	0.0339272	0.00656496	0.873387
SOCS7	-0.102666	0.0339404	0.0180471	0.635037
AMEX60DD006795	0.245403	0.0340018	-0.0515523	0.442764
AMEX60DD003274	-0.559933	0.0340075	0.195654	0.193448
BMP5	0.0991138	0.0340605	-0.0344546	0.236431
VGLL1	0.320017	0.0340959	-0.127695	0.170291
TAPBPL	-0.116433	0.0341434	-0.00525866	0.923659
AMEX60DD001556	-0.317503	0.0341821	-0.026066	0.785729
NSMCE1	-0.142002	0.0342319	0.000974748	0.980493
CPA6	0.0691502	0.0343034	-0.0247847	0.203434
AMEX60DD021560	0.282187	0.034307	-0.0630891	0.463065
ALPK2	0.11305	0.0343352	0.0419317	0.32934
SLC7A11	0.0988726	0.0344031	-0.00517533	0.892982
SOD2	-0.883162	0.0345454	-0.114163	0.641299
RCCD1	-0.391956	0.0345774	-0.155696	0.160273
EXD3	0.124146	0.0346207	0.0128652	0.623709
DMTN	-0.104107	0.034811	-0.00408438	0.893792
GZMA	0.223687	0.0348634	0.0480655	0.431186
AMEX60DD038829	-0.217392	0.0348914	-0.115959	0.364726
COL28A1	0.0959339	0.0349134	-0.055394	0.196808
CEMIP2	-0.151615	0.0349392	0.0188908	0.590352
AMEX60DD048646	0.250395	0.0349459	-0.0327817	0.651945
RAB28	0.0698187	0.035059	0.0147162	0.551428
HELZ2	0.0985364	0.0351857	-0.0674755	0.21108
ESYT3	-0.129773	0.0352711	-0.0265357	0.478506
PIEZO1	0.155073	0.0352816	0.0464258	0.349655
PLG	0.0882988	0.0353297	0.015716	0.624769
AMEX60DD015157	1.26123	0.0353661	-0.149305	0.770178
AMEX60DD056596	1.26123	0.0353662	-0.10891	0.701999
MVB12B	-0.116467	0.0354504	0.0238089	0.514639
ADGRF5	0.148239	0.0355922	0.0148486	0.72298
AMEX60DD003250	0.220498	0.0356598	-0.0620334	0.342806
PREB	0.187759	0.0357501	-0.0474053	0.597164
PROSER1	0.0953725	0.0357609	-0.0392987	0.335214
MTMR1	-0.0932554	0.0358511	-0.0397624	0.0500409
NRF1	-0.109409	0.0359215	-0.057739	0.174853
BRAT1	-0.124932	0.0360977	0.0517313	0.148779
AMEX60DD046277	-0.14422	0.03611	-0.00085606	0.984785
ADGRD1	-0.178103	0.0361174	-0.00979934	0.86362
CDH23	0.135924	0.036208	0.016136	0.661837
AMEX60DD003510	1.54698	0.0363589	0.279195	0.568446
AMEX60DD041718	1.54698	0.0363589	0.245392	0.533124
SELE	1.54698	0.0363589	-0.0368802	0.432762
AMEX60DD006092	-0.172067	0.0365156	0.0425285	0.58697
AMEX60DD027439	0.309461	0.0365512	0.107687	0.115991
GTF2A2	-0.201843	0.0366959	0.0475607	0.303558
TBC1D13	-0.126041	0.0367485	-0.0140326	0.814956
CPXM1	0.321422	0.0368095	-0.0631251	0.598158
FLNA	-0.148663	0.0368219	0.00681669	0.815137
SMIM13	0.176505	0.0369079	-0.0443118	0.540859
RBKS	0.139276	0.0369533	0.0389055	0.331553
AMBP	0.268658	0.0369803	0.0239061	0.727233
AMEX60DD055175	0.48362	0.0369956	-0.00397152	0.985565
EFNB3	-0.118735	0.0370059	0.0497297	0.162619
HDAC5	-0.0723849	0.0370349	-0.0241288	0.429584
AMEX60DD043516	0.151132	0.0370555	-0.0770715	0.0832916
AMEX60DD002088	-1.45302	0.0370684	0.478726	0.403196
AMEX60DD030636	0.523414	0.0370853	0.0394877	0.797646
INF2	-0.159498	0.0371243	0.0627512	0.18794
HDC	0.307652	0.0371409	0.0280143	0.77246
TMTC2	0.0810538	0.0371876	-0.0342482	0.283546
NEUROD2	-0.48657	0.0371944	0.213986	0.0959341
KIF13B	-0.105983	0.0371991	-0.0247549	0.605647
RPP30	-0.227016	0.0372672	0.00774218	0.915528
AMEX60DD023865	0.169419	0.0372683	-0.0602159	0.330438
PDYN	0.165892	0.0372923	0.0775979	0.326209
AMEX60DD032598	-1.06969	0.0373325	0.100523	0.857416
SPPL2A	-0.090155	0.0373426	-0.0630243	0.0829911
CUEDC1	-0.0830601	0.0374427	-0.0220325	0.521255
IMP3	0.222547	0.0375571	0.0391122	0.561042
AMEX60DD035797	0.384857	0.0375686	0.153412	0.102989
AQP8	-0.323735	0.0375854	0.0647425	0.681218
PPP1R9A	-0.0718751	0.0376127	-0.0370524	0.646164
AMEX60DD030313	-0.481997	0.0377357	0.00136573	0.992581
SPEG	0.0564971	0.0377493	-0.0281449	0.0852973
AMEX60DD042843	0.198578	0.0377745	0.0355419	0.522138
BRDT	-0.116833	0.0378113	-0.0468261	0.178621
AMEX60DD031455	0.629723	0.0378154	0.0729089	0.769561
LRRC47	0.128793	0.0378372	0.0139649	0.715537
FSTL4	0.0811672	0.0378503	0.011744	0.585739
AMEX60DD023151	-0.627047	0.0378727	-0.177132	0.274133
AMEX60DD014997	0.467948	0.037907	0.0312672	0.814654
AMEX60DD016806	-0.148945	0.0379795	0.00906515	0.852366
AMEX60DD054211	3.27993	0.037997	-1.03286	0.0508266
RNASEL	0.25664	0.0380098	0.00759194	0.938062
NUDT6	-0.129735	0.0380219	0.0970062	0.0114284
AMEX60DD051974	0.194213	0.038036	-0.0212002	0.708775
KAT5	0.305385	0.0380437	-0.0592154	0.157314
AMEX60DD047319	-0.398786	0.0381358	0.10927	0.357009
RGS13	0.230942	0.0382331	-0.00371813	0.955246
B4GALNT1	-0.0948029	0.0383034	-0.00234905	0.950668
AMEX60DD011681	0.705411	0.0383122	-0.107253	0.541063
AMEX60DD028438	-0.752578	0.0383848	-0.22112	0.351402
DRAM2	0.146444	0.0384453	-0.0389447	0.532102
PRKAG1	-0.15552	0.0384943	-0.0341705	0.323009
AMEX60DD009797	0.250513	0.0385271	-0.00631928	0.947598
ARAP2	0.0620118	0.0385628	-0.0336071	0.149216
GJA1	-0.312155	0.0385979	0.212014	0.0180874
PDE1B	0.210717	0.0386252	-0.0314502	0.296523
PSAT1	0.296122	0.0386413	0.0340443	0.703709
RUFY1	-0.0895725	0.0386726	-0.0347784	0.0508543
GPR173	0.1481	0.0386726	-0.0486642	0.416377
GNB4	-0.0959825	0.0387002	-0.0597498	0.232645
RUNX1T1	0.152555	0.0388749	0.0237164	0.740811
SDAD1	-0.113337	0.0389558	0.000118706	0.997977
AMEX60DD019574	-0.30734	0.0389878	0.0194418	0.833277
AMEX60DD046912	-0.351932	0.0390314	-0.0311454	0.736662
AMEX60DD003703	0.149018	0.0390342	-0.0590854	0.162178
AMEX60DD031980	-0.826235	0.0390686	0.190745	0.399388
PSME4	-0.189625	0.0390942	-0.017876	0.532464
AMEX60DD003495	0.0852039	0.0391785	-0.0453442	0.306678
CARTPT	-0.210657	0.0392444	-0.040389	0.556472
AMEX60DD011239	-1.71605	0.0393762	0.336122	0.47516
AMEX60DD053607	-1.71605	0.0393762	0.353195	0.414469
DXO	-0.426546	0.0395125	-0.00504647	0.881781
GRID2	0.0913394	0.0395658	0.0243298	0.186553
MAP3K7CL	0.150452	0.0395689	-0.0414114	0.343009
PLXNB2	-0.13882	0.0397445	-0.064379	0.018454
UBA3	-0.0787335	0.0398201	-0.0257303	0.274271
RER1	-0.168263	0.0398808	-0.0488019	0.340993
WAPL	-0.0635289	0.0399056	-0.0492737	0.046499
MFF	-0.111642	0.0399484	-0.0614562	0.194752
PPARG	0.128259	0.0399511	0.0175896	0.754607
SOSTDC1	0.798521	0.039982	-0.0489031	0.838898
TMC3	0.138537	0.039984	-0.0906954	0.0644238
REC114	0.105144	0.0400849	0.0786978	0.14524
NINJ1	0.142943	0.0401237	-0.0402541	0.350621
AMEX60DD046457	-0.553323	0.0401439	-0.150826	0.644044
NCAM2	0.0785638	0.0402746	-0.0289091	0.208792
AMEX60DD016971	-0.460795	0.0403282	-0.00976004	0.944608
AMEX60DD053344	-0.264852	0.0403455	0.00197093	0.977751
AMEX60DD031862	0.365336	0.0403554	0.0965587	0.388988
WDR36	-0.0912605	0.0403601	-0.0437292	0.41578
RGS19	0.123685	0.0403637	0.0472816	0.199657
LGALSL	-0.243058	0.0403864	0.0199814	0.786218
FRS2	0.108463	0.0403869	0.00837549	0.795899
ARHGAP32	-0.0603055	0.040412	0.00627339	0.868926
AMEX60DD029783	1.67626	0.0404232	-0.303152	0.451708
AMEX60DD050497	1.67626	0.0404232	0.306902	0.492597
PHLDB1	0.153547	0.0405709	0.0648268	0.351773
RORB	0.0973233	0.0405831	0.025206	0.360677
ANAPC2	-0.108646	0.0406097	0.000806524	0.980467
NEMF	-0.201808	0.0406695	-0.0115684	0.630285
JAG1	0.330241	0.0406959	-0.040648	0.668754
ENOX2	-0.111755	0.0407042	-0.0580843	0.225507
AMEX60DD039868	0.350924	0.0407359	0.0437043	0.571997
MARCHF6	-0.057886	0.0407548	-0.0141176	0.723331
CCDC189	0.142308	0.0407806	-0.0226239	0.576071
EML2	0.10074	0.0407962	0.0251965	0.39455
AMEX60DD009728	0.232601	0.0408265	-0.0416643	0.556207
STK3	-0.0601161	0.0408879	-0.00824856	0.649576
SRSF10	-0.658337	0.0409112	0.0813079	0.710948
SMTNL2	-0.270913	0.0409624	0.091462	0.200727
ZDHHC4	0.150349	0.0409824	0.0496198	0.262537
NUSAP1	-0.257098	0.0409982	0.00407994	0.936409
AMEX60DD048671	-0.258063	0.041014	0.0312672	0.688999
SRP9	-0.264178	0.0410468	-0.00867348	0.928164
NFXL1	0.0800765	0.0410585	-0.0429171	0.192437
CPLX4	0.149497	0.0411536	-0.00488572	0.911494
AMEX60DD009514	-0.179095	0.041209	0.0589028	0.389776
OLFML2A	0.144215	0.0412972	0.0564136	0.520746
AMEX60DD007848	-2.30101	0.0413247	1.16877	0.0336552
AMEX60DD028752	-2.30101	0.0413247	-0.553695	0.347169
AMEX60DD052058	-2.30101	0.0413247	-0.290661	0.602928
SH2D1A	0.0953837	0.0413966	-0.00953083	0.815974
AMEX60DD014718	0.189508	0.0414243	-0.0428347	0.422512
AMEX60DD003742	-0.371141	0.0414613	-0.0574179	0.594571
SLC37A1	-0.139163	0.0414675	-0.0298464	0.682924
PCNX3	-0.0731247	0.0415101	-0.00671649	0.76297
AMEX60DD040123	0.338395	0.0415627	0.0717193	0.467133
CXORF56	0.113693	0.0415671	-0.00882073	0.789466
AMEX60DD029141	0.207619	0.0415889	-0.0462826	0.587668
AMEX60DD017994	0.164274	0.0416178	-0.0241787	0.626045
EPHX2	-0.0783244	0.0416517	-0.0147144	0.533185
EEA1	-0.0564879	0.0416663	-0.0122839	0.628297
AMEX60DD027250	0.413716	0.0417049	0.0663646	0.702431
COL4A2	0.086062	0.0417504	0.0812642	0.00184003
AMEX60DD034220	0.404404	0.0419273	-0.0942637	0.293708
AMEX60DD041266	-0.480489	0.0419911	0.113516	0.274545
IGSF10	0.18162	0.0420019	0.000161137	0.998386
AMEX60DD032955	0.395841	0.0420576	-0.0964153	0.376781
AMEX60DD042434	-0.222588	0.0422318	-0.0307301	0.754478
AMEX60DD004124	-0.645663	0.0422878	0.071326	0.787119
AMEX60DD018960	0.743379	0.0423007	-0.25204	0.182655
PRPSAP2	-0.0965515	0.0424928	0.0163905	0.705055
DIABLO	-0.120147	0.0425204	-0.0366418	0.290682
ST6GAL1	0.461032	0.0425448	-0.0596943	0.709009
AMEX60DD041939	0.172445	0.0425809	0.00407232	0.937601
ADARB1	0.122711	0.0425862	0.0125818	0.738365
NFIC	0.0879891	0.04259	0.0237357	0.51351
AMEX60DD035190	0.86891	0.0426025	0.374155	0.214334
CTIF	0.0758461	0.0426459	0.0432197	0.153292
ADRA1A	0.114739	0.0428704	-0.0408932	0.244102
SIRT4	-0.313743	0.0429322	0.0132186	0.913074
AMEX60DD026879	-1.13109	0.0429384	0.381764	0.210243
AMEX60DD005413	0.143711	0.0431212	0.0290086	0.676424
GSKIP	-0.227892	0.0431998	0.00398291	0.931653
AMEX60DD053317	0.139439	0.0432417	-0.0602788	0.144375
LZTS1	-0.134143	0.0432664	-0.014202	0.722572
AMEX60DD015885	0.40843	0.0433089	-0.180496	0.144902
AMEX60DD026974	0.559226	0.0433506	-0.146825	0.385459
GRM4	-0.14779	0.0434091	0.041316	0.111596
AMEX60DD054092	0.916216	0.0434705	0.304216	0.434697
VAT1L	0.0884651	0.0435471	-0.0432403	0.174493
AMEX60DD047906	0.0754674	0.0435957	-0.0274523	0.104703
AMEX60DD027205	1.05333	0.043598	-0.190577	0.730989
RPL34	-0.63359	0.0436448	0.24119	0.264676
NT5C2	0.0856277	0.0437775	0.00313145	0.905375
GOLGA4	-0.138732	0.0438674	-0.0201528	0.689267
NCOA7	0.0830567	0.0439097	-0.0382997	0.125112
AMEX60DD040302	-0.350258	0.0439547	-0.0879612	0.427717
MNT	-0.162799	0.0440362	0.000520851	0.991985
RAB10	-0.124469	0.0440466	-0.0472389	0.352958
AMEX60DD041426	2.58274	0.044091	0.404726	0.16213
RET	0.128845	0.0441515	-0.0089761	0.890377
FAM89A	-0.198518	0.0441785	0.0135819	0.82838
MADD	-0.0572765	0.0441917	-0.0598552	0.054996
AMEX60DD005021	-0.519655	0.0442892	0.270054	0.0916636
PNN	-0.153239	0.0443925	-0.0322357	0.49799
NOXRED1	0.242169	0.0444661	0.0188301	0.807633
AMEX60DD037005	-0.967591	0.044518	-0.0427334	0.853292
AMEX60DD040261	-0.967591	0.044518	-0.0377898	0.941366
ZFX	-0.139444	0.0446068	-0.0569545	0.18024
CILP2	-0.145681	0.0446275	0.0487887	0.609759
DAD1	-0.344084	0.0446748	-0.028439	0.790756
TUBA8	0.161793	0.0446961	-0.0183432	0.707283
AMEX60DD004428	0.0897888	0.0447034	0.00143822	0.965066
AMEX60DD056442	1.86891	0.044763	0.474874	0.211534
AMEX60DD046323	1.86891	0.044763	0.496931	0.22932
AMEX60DD006554	1.86891	0.0447631	0.478842	0.361895
AMEX60DD007275	1.86891	0.0447631	0.0801768	0.83101
BIN2	0.119434	0.0448284	0.00811415	0.827824
SLC12A8	0.0964828	0.0448671	-0.0812902	0.00492498
KHDRBS2	0.086046	0.0448783	-0.0209123	0.27994
TMEM232	0.166014	0.0449012	-0.01137	0.80338
AMEX60DD049351	0.15131	0.0449561	0.0779241	0.25954
ACOT7	0.0661357	0.0450992	0.00347687	0.899292
CARD19	0.158852	0.0451046	0.0229037	0.624845
RUVBL2	-0.177152	0.0451383	0.0404337	0.45575
SEPTIN6	0.114137	0.0451596	-0.0703193	0.0389174
STAT3	-0.110135	0.0451718	-0.00858663	0.796246
AMEX60DD029930	1.37141	0.0453019	-0.475693	0.270848
REST	1.37141	0.0453019	-0.0107383	0.94125
OTOG	0.256312	0.0453131	-0.0502456	0.446574
ZNF512	-0.134206	0.0453232	-0.0190179	0.63956
AMEX60DD043018	-0.683631	0.0453571	-0.143819	0.483878
AMEX60DD055381	-0.172093	0.0453744	0.159909	0.115539
DUPD1	0.180767	0.0455093	-0.0754897	0.336385
AMEX60DD038469	0.171094	0.0455142	-0.0102203	0.839528
ITPRID1	0.0892815	0.0456091	0.0124901	0.6426
RBM12B	0.461252	0.0456447	0.0839937	0.637718
TMEM86A	-0.266828	0.04568	0.0986135	0.245155
AMEX60DD047544	-0.75558	0.0456906	-0.0370593	0.881249
CDH8	0.096542	0.0457173	-0.0286318	0.151891
RYR2	0.0689307	0.0458175	-0.0134383	0.519786
TAGAP	0.131915	0.0459052	-0.0286988	0.283215
CTNND1	-0.115897	0.0459529	-0.0321338	0.369042
PTPRQ	0.157982	0.0459622	-0.0137425	0.798114
MUTYH	-0.12202	0.0459716	-0.0495081	0.18521
RCBTB2	-0.0664809	0.0460007	-0.0116428	0.696134
HEG1	-0.143674	0.0460608	-0.0144943	0.740412
XAF1	-0.14157	0.0461311	-0.0893295	0.216735
ARHGAP27	-0.0882648	0.0462791	0.00358525	0.931424
AMEX60DD002308	0.272807	0.0462857	0.0733488	0.430961
AMEX60DD051215	-0.405646	0.046299	-0.106234	0.46293
NFIB	-0.0746591	0.0463186	0.0763521	0.0676769
EFEMP1	0.089369	0.0464642	-0.00264433	0.92205
WDR27	0.132786	0.0465652	0.00978712	0.733051
ACTA2	-0.413125	0.0466061	0.149031	0.427585
SLC25A6	0.398163	0.0466124	-0.0923075	0.46868
AMEX60DD006469	0.398163	0.0466124	-0.106236	0.381181
ITSN2	-0.0700735	0.0466151	-0.0491867	0.169278
HEXIM1	0.30221	0.0466488	-0.00929858	0.916172
F8	-1.5096	0.0467652	0.101393	0.159313
KIF12	0.100914	0.0467765	0.0376608	0.214969
TRPC3	0.115046	0.0468614	0.00554367	0.915266
NRXN3	0.0765738	0.046884	0.0833122	0.0957295
AMEX60DD003115	0.330358	0.0469065	-0.0966889	0.0538499
AMEX60DD020814	0.194572	0.0469663	0.0557555	0.126767
SLC23A1	0.0785841	0.0472516	0.021514	0.364502
LAMA1	0.095776	0.0472777	0.0346799	0.226032
NNT	-0.0965819	0.0473095	-0.000351547	0.993757
FAM163A	-0.119725	0.0473181	0.0298663	0.415849
AMEX60DD006095	-2.61171	0.047358	-0.132558	0.882501
AMEX60DD048234	-2.61171	0.047358	-0.0999773	0.818402
AMEX60DD037658	-2.61171	0.0473581	-0.776088	0.224838
AMEX60DD056504	-2.61171	0.0473581	-0.246149	0.835191
AMEX60DD025656	-2.61171	0.0473581	0.768232	0.465908
AMEX60DD001456	-2.61171	0.0473581	-0.281573	0.79678
AMEX60DD025062	-2.61171	0.0473581	-1.34724	0.0759695
AMEX60DD043290	-2.61171	0.0473581	0.237718	0.663681
AMEX60DD017877	-2.61171	0.0473581	1.60315	0.288706
AMEX60DD036057	-2.6117	0.0473581	0.393837	0.588031
AMEX60DD009481	-2.6117	0.0473581	-0.552966	0.508115
AMEX60DD039216	-2.6117	0.0473581	-0.38377	0.546341
AMEX60DD016942	-2.6117	0.0473581	0.409779	0.499499
AMEX60DD027085	-2.6117	0.0473581	0.516694	0.387037
AMEX60DD015182	-2.6117	0.0473581	-0.180237	0.689966
AMEX60DD021232	-2.6117	0.0473581	1.20119	0.165889
AMEX60DD029270	-2.6117	0.0473582	-0.355756	0.503312
AMEX60DD049328	-2.6117	0.0473582	-0.492295	0.294549
AMEX60DD015330	-2.6117	0.0473582	-1.8432	0.0498191
AMEX60DD047206	-2.6117	0.0473582	-1.7057	0.0724876
AMEX60DD026488	-2.6117	0.0473582	-0.106236	0.866164
AMEX60DD004544	-2.6117	0.0473582	0.0312672	0.975549
AMEX60DD006817	-2.6117	0.0473582	1.35319	0.112865
AMEX60DD008500	-0.407421	0.0473909	-0.135584	0.269524
CIITA	0.0866154	0.0475372	0.0139444	0.591593
AMEX60DD055412	-1.06397	0.0475383	0.33939	0.422663
AMEX60DD032355	-1.06397	0.0475383	0.286524	0.414689
USP1	-0.173761	0.0476282	0.00177155	0.973913
BAG6	0.0978017	0.0476334	-0.00826759	0.653675
AMEX60DD000005	-0.146197	0.0476405	-0.0185175	0.819297
STC1	0.453873	0.0477333	0.181293	0.177439
AMEX60DD025082	-0.735161	0.0478398	0.643451	0.00371597
AMEX60DD032102	-0.735161	0.0478398	-0.104946	0.748868
SEMA4B	0.47812	0.0478823	0.0827975	0.598949
ST3GAL6	0.0877338	0.0479876	-0.0252538	0.361487
AMEX60DD035625	0.241143	0.0480334	-0.0450618	0.559268
ITGA8	0.0839851	0.0480919	-0.0382273	0.423171
ATG16L1	0.257106	0.0480926	-0.276043	0.000417512
TRAF3IP1	0.0760961	0.0482912	-0.0301739	0.19853
UPB1	0.106713	0.0483144	-0.00129385	0.979472
PAX5	0.122456	0.0483285	0.0234134	0.386514
CRIP1	0.343819	0.0483577	0.10688	0.537431
ADAM22	0.0543404	0.0483827	-0.0163987	0.483027
RBMS3	0.0782853	0.0484548	0.0582272	0.0521298
AMEX60DD017968	0.201249	0.0484759	0.00167904	0.978015
AMEX60DD014539	1.19084	0.0484788	-0.075648	0.847329
TXNDC11	0.0702172	0.048518	-0.0464144	0.0416352
PSMB8	-0.754618	0.048522	-0.174821	0.0104085
KLHL12	0.123914	0.048673	-0.0160014	0.760919
AMEX60DD039480	0.737666	0.0487081	0.165568	0.452209
AMEX60DD051698	0.259224	0.0487605	-0.0186498	0.750151
LOC100130764	-1.21855	0.0488368	0.198377	0.450244
AMEX60DD036121	0.48782	0.0489331	-0.112779	0.423141
AMEX60DD007226	0.10115	0.0489622	-0.0187112	0.697913
M1AP	-0.0935339	0.0490175	0.0166026	0.613283
AMEX60DD054773	0.274323	0.0490677	0.0603158	0.470494
KCTD11	-0.809161	0.0491077	0.166197	0.551735
AMEX60DD043434	0.223639	0.0491548	-0.0438476	0.700333
AMEX60DD004556	0.13782	0.0491603	0.0352755	0.385483
ST8SIA4	-1.86805	0.0491833	-0.00143681	0.969249
AMEX60DD024536	-1.86805	0.0491833	0.982358	0.0322753
AMEX60DD029745	0.244168	0.0492862	-0.00419765	0.962976
CHST3	0.126227	0.0493405	0.05452	0.16267
PDE6H	0.135861	0.0494489	0.0673676	0.111929
AMEX60DD033301	0.139937	0.0494919	-0.0254821	0.541556
AMEX60DD022182	2.19077	0.0494927	0.938158	0.137452
AMEX60DD028418	2.19077	0.0494927	0.838622	0.108201
AMEX60DD034567	2.19077	0.0494927	-0.66061	0.194454
AMEX60DD044441	2.19077	0.0494927	-0.175184	0.748629
AMEX60DD040187	0.199119	0.0495036	-0.0296043	0.642122
PPEF1	0.0988658	0.0495102	0.103232	0.685013
NDRG2	-0.214156	0.0495173	-0.018444	0.821097
IDNK	-0.154759	0.0495256	0.0372206	0.486665
ACP5	-0.236885	0.0495427	0.0324513	0.761293
PPP1R18	-0.19804	0.0495658	-0.0470803	0.655863
ZDHHC2	0.0744358	0.0495987	-0.0228413	0.311184
NLRP12	0.590194	0.0496184	-0.136124	0.64303
TMEM129	0.248875	0.0496427	0.0250798	0.7451
CXCR3	-0.434159	0.0497004	0.118378	0.360606
AMEX60DD052912	0.36641	0.0497061	0.112187	0.25549
CDK20	0.101422	0.0498322	-0.00259334	0.933552
SH2D2A	0.129209	0.0498395	0.0385972	0.572036
AGT	0.181232	0.0498538	0.0123063	0.850562
AMEX60DD010710	-0.240319	0.0499101	0.104729	0.140512
ANGPTL4	-0.389158	0.0499324	-0.0902338	0.485203
CKS2	-0.716052	0.0499555	0.198995	0.391348
NKX2-1	0.396842	0.0499762	0.254567	0.0510443
CWH43	-0.106515	0.0500456	-0.021827	0.601496
AMEX60DD028783	2.54356	0.0500488	-1.08421	0.127838
AMEX60DD010716	2.54356	0.0500489	-0.191125	0.811788
GLT8D2	2.54356	0.050049	0.0194568	0.694937
AMEX60DD035374	2.54356	0.0500491	0.517314	0.518624
TIMELESS	2.54356	0.0500491	-0.00859373	0.794879
AMEX60DD019718	2.54356	0.0500492	-0.120736	0.855473
AMEX60DD005469	2.54356	0.0500493	-0.762282	0.103186
AMEX60DD019840	2.54356	0.0500493	0.320774	0.620824
AMEX60DD047444	2.54356	0.0500493	-0.331303	0.648619
AMEX60DD003913	2.54356	0.0500493	0.768233	0.144756
AMEX60DD037064	2.54356	0.0500493	0.0303937	0.966061
ARHGAP39	2.54356	0.0500493	0.0158508	0.690895
AMEX60DD007931	2.54356	0.0500494	0.0237135	0.969055
AMEX60DD000999	2.54356	0.0500494	1.03127	0.15282
AMEX60DD027202	2.54356	0.0500494	-0.530378	0.372546
AMEX60DD011734	2.54356	0.0500494	-0.509301	0.367423
AMEX60DD008463	2.54356	0.0500494	-1.10624	0.0138018
AMEX60DD055727	2.54356	0.0500494	0.25366	0.654922
AMEX60DD013408	2.54356	0.0500494	-0.200058	0.625054
AMEX60DD017644	2.54356	0.0500494	0.739793	0.488826
AMEX60DD049302	2.54356	0.0500494	0.0312672	0.955935
AMEX60DD025482	2.54356	0.0500494	0.723145	0.155508
AMEX60DD044710	2.54356	0.0500495	0.69023	0.102728
AMEX60DD014383	2.54356	0.0500495	-0.191125	0.811788
AMEX60DD045524	2.54356	0.0500495	-0.620809	0.373463
AMEX60DD021904	2.54356	0.0500495	0.25366	0.584116
AMEX60DD013281	2.54356	0.0500495	0.0490724	0.958269
MAP3K4	2.54356	0.0500496	-0.0141634	0.673543
AMEX60DD015290	2.54356	0.0500496	0.459418	0.439257
AMEX60DD048538	2.54356	0.0500497	-0.20792	0.407565
AMEX60DD014269	2.54355	0.0500497	-1.16138	0.0756648
AMEX60DD004260	2.54355	0.0500497	-0.679226	0.218625
CAV1	0.228531	0.0501728	-0.0205523	0.763693
RICTOR	-0.0991273	0.0501824	0.0274054	0.185577
TNS1	0.0571432	0.0503185	0.0384968	0.10577
RPS9	-0.641284	0.050323	-0.188046	0.433915
POLL	0.0952145	0.0503409	-0.0637695	0.0315383
CCDC136	0.113003	0.0504794	-0.0469458	0.311949
OTC	0.16299	0.050514	0.0143141	0.772252
KIF5A	0.0772957	0.0505779	0.036702	0.540612
AMEX60DD044662	0.692032	0.0505806	-0.178186	0.469345
AMEX60DD053612	0.692032	0.0505806	0.169791	0.455733
AMEX60DD016163	0.110565	0.0505954	0.0326166	0.365265
SS18L2	0.152703	0.0506545	0.0486045	0.319331
DOP1A	0.134326	0.0506801	-0.0609523	0.30454
AMEX60DD056595	-0.275136	0.0506913	0.074973	0.485737
CPN1	-0.110157	0.050734	-0.0151105	0.653673
DNAJC7	-0.0867168	0.0507344	-0.0115966	0.7321
TMEM87A	-0.112653	0.0507439	0.0145676	0.686456
AMEX60DD031049	-0.176178	0.0507445	0.132196	0.273481
PACRGL	0.156634	0.0507516	-0.0226086	0.646461
AMEX60DD024353	2.698	0.0507866	1.51147	0.29479
AMEX60DD052599	2.698	0.0507866	-0.45416	0.447068
AMEX60DD042388	2.698	0.0507866	0.0312672	0.982709
AMEX60DD045173	2.698	0.0507866	-2.86193	0.0257786
AMEX60DD037362	2.698	0.0507867	0.516694	0.54077
SSR3	2.698	0.0507867	0.146447	0.157467
AMEX60DD019708	2.698	0.0507867	-0.175184	0.748629
AMEX60DD013673	2.698	0.0507867	-0.161378	0.828885
AMEX60DD033296	2.698	0.0507867	-0.553695	0.674176
AMEX60DD031143	2.698	0.0507867	0.353195	0.715148
AMEX60DD041672	2.698	0.0507867	-0.0345815	0.984237
AMEX60DD047714	2.698	0.0507867	-0.120736	0.855473
AMEX60DD045589	2.698	0.0507867	-0.968731	0.438132
AMEX60DD037880	2.698	0.0507867	0.709339	0.388436
AMEX60DD050692	2.698	0.0507867	-1.29066	0.284947
AMEX60DD040182	2.698	0.0507867	-0.968732	0.342311
AMEX60DD005239	2.698	0.0507867	1.03127	0.409143
AMEX60DD014445	2.698	0.0507867	0	1
AMEX60DD039266	2.698	0.0507867	-0.861931	0.580176
AMEX60DD019101	2.698	0.0507868	-0.705698	0.343516
AMEX60DD036683	2.698	0.0507868	-0.191125	0.811788
AMEX60DD049294	2.698	0.0507868	0.0893231	0.961624
AMEX60DD038161	2.698	0.0507868	0.61623	0.508151
AMEX60DD022031	2.698	0.0507868	-1.55369	0.187177
AMEX60DD049363	2.698	0.0507868	-1.44689	0.315904
AMEX60DD011008	2.698	0.0507868	-0.705698	0.502985
AMEX60DD039743	2.698	0.0507868	2.92651	0.0226172
RETREG3	2.698	0.0507868	0.0541072	0.144233
AMEX60DD035628	2.698	0.0507868	-1.29066	0.130488
AMEX60DD011754	2.698	0.0507868	0.201192	0.774114
AMEX60DD037528	2.698	0.0507868	-0.454159	0.590838
AMEX60DD036523	2.698	0.0507868	0.25366	0.751979
AMEX60DD017232	2.698	0.0507868	0.223912	0.764266
AMEX60DD025367	2.698	0.0507868	0.995105	0.550277
AMEX60DD032082	2.698	0.0507868	0.0312672	0.972664
AMEX60DD053675	2.698	0.0507868	-0.38377	0.727624
AMEX60DD029199	2.698	0.0507868	-0.08421	0.884073
AMEX60DD041760	2.698	0.0507868	0.353195	0.527313
AMEX60DD032725	2.698	0.0507868	-1.38377	0.156551
AMEX60DD020541	2.698	0.0507868	-0.258239	0.690449
AMEX60DD027598	2.698	0.0507869	0.0312672	0.96333
AMEX60DD034121	2.698	0.0507869	-0.968732	0.272854
AMEX60DD019522	2.698	0.0507869	-1.42816	0.0899905
AMEX60DD034971	2.698	0.0507869	0.0312672	0.96333
AMEX60DD044727	2.698	0.0507869	0.446305	0.482959
AMEX60DD037459	2.698	0.0507869	-0.553695	0.674176
AMEX60DD050091	2.698	0.0507869	0.683344	0.327256
AMEX60DD041002	2.698	0.0507869	0.768233	0.465908
AMEX60DD040623	2.698	0.0507869	0.294302	0.633769
AMEX60DD017375	2.698	0.0507869	-0.74634	0.123976
AMEX60DD007669	2.698	0.0507869	-0.145218	0.861146
AMEX60DD052953	2.698	0.0507869	-1.19112	0.231523
AMEX60DD036357	2.698	0.0507869	0.61623	0.508151
AMEX60DD001836	2.698	0.0507869	-0.347244	0.567168
AMEX60DD041485	2.698	0.0507869	0.61623	0.417689
AMEX60DD004897	2.698	0.0507869	-0.968733	0.342311
AMEX60DD041113	2.698	0.0507869	-0.191125	0.811788
AMEX60DD017748	2.698	0.050787	0.382144	0.566802
AMEX60DD011686	2.698	0.050787	-0.776088	0.390749
AMEX60DD017272	2.698	0.050787	0.320774	0.620824
AMEX60DD007850	2.698	0.050787	2.9265	0.0226173
AMEX60DD035820	2.698	0.050787	0.146744	0.79943
AMEX60DD045813	2.698	0.050787	-0.42964	0.67608
AMEX60DD049366	2.698	0.050787	0.0312672	0.972664
AMEX60DD051413	2.698	0.050787	0.409779	0.499499
AMEX60DD037265	2.698	0.050787	0.446304	0.685448
AMEX60DD044431	2.698	0.050787	-0.191125	0.811788
AMEX60DD018514	2.698	0.050787	-0.120736	0.855473
AMEX60DD030530	2.698	0.050787	-1.09426	0.0372398
AMEX60DD001576	2.698	0.050787	0.0312672	0.957662
AMEX60DD048861	2.698	0.050787	-0.843201	0.249482
AMEX60DD053673	2.698	0.050787	-0.483306	0.49664
AMEX60DD041632	2.698	0.050787	0.353195	0.715148
LYSMD1	2.698	0.050787	-0.0832671	0.935289
AMEX60DD041713	2.698	0.050787	-0.861931	0.580176
AMEX60DD021015	2.698	0.050787	-1.24849	0.425513
AMEX60DD023587	2.698	0.050787	-1.13866	0.189047
AMEX60DD051926	2.698	0.0507871	-0.454159	0.590838
AMEX60DD037595	2.698	0.0507871	0.427196	0.330598
AMEX60DD054337	2.698	0.0507871	0.353195	0.715148
AMEX60DD005990	2.698	0.0507871	0.0312672	0.975549
AMEX60DD028614	2.698	0.0507871	-0.290661	0.671028
AMEX60DD032661	2.698	0.0507871	-0.620809	0.373463
PEG10	2.698	0.0507871	0.164534	0.646059
AMEX60DD042976	2.698	0.0507871	-0.138658	0.843207
AMEX60DD053541	2.698	0.0507871	0.25366	0.751979
AMEX60DD004361	2.698	0.0507871	-0.555508	0.692522
AMEX60DD000912	2.698	0.0507871	-0.620809	0.373463
AMEX60DD032449	2.698	0.0507871	0.768233	0.465908
AMEX60DD027242	2.698	0.0507871	-3.18386	0.0117208
AMEX60DD001147	2.698	0.0507871	0.879264	0.122283
AMEX60DD018510	2.698	0.0507871	-0.631698	0.235044
AMEX60DD040635	2.698	0.0507871	-0.231767	0.707516
AMEX60DD055322	2.698	0.0507871	0.156798	0.794579
AMEX60DD007659	2.698	0.0507872	0.168771	0.788901
AMEX60DD004264	2.698	0.0507872	-0.106236	0.866164
AMEX60DD027708	2.698	0.0507872	-0.0682684	0.898673
AMEX60DD035340	2.698	0.0507872	-0.38377	0.622328
AMEX60DD031679	2.698	0.0507872	-0.5673	0.700731
AMEX60DD000221	2.698	0.0507872	-0.290661	0.763922
AMEX60DD000386	2.698	0.0507872	-1.38377	0.156551
AMEX60DD031819	2.69799	0.0507872	-0.45416	0.590838
AMEX60DD029581	2.69799	0.0507873	-0.675002	0.108309
AMEX60DD054216	2.69799	0.0507873	-0.328757	0.716863
AMEX60DD046157	2.69799	0.0507873	0.6937	0.512045
AMEX60DD043961	2.69799	0.0507874	0.18327	0.78218
CES5A	-0.074134	0.0509061	0.00198791	0.938085
AMEX60DD038927	1.45387	0.0509979	0.583808	0.22685
SLC12A2	1.45387	0.050998	0.179366	0.583492
AMEX60DD021152	0.274167	0.0510478	-0.0670188	0.438055
ANKRD13D	-0.120511	0.0510633	-0.10522	0.0426772
AMEX60DD032913	0.197974	0.0510727	-0.00312979	0.958832
AMEX60DD018337	-0.142131	0.0511125	-0.00933391	0.838307
AMEX60DD008090	-0.0840589	0.0512427	-0.0118361	0.647176
GPR161	0.202466	0.0512719	-0.109463	0.0800452
AMEX60DD044096	0.410619	0.0514484	0.0312672	0.806302
HYKK	-0.126689	0.0514971	0.0905043	0.0993997
GALNS	0.117486	0.0515089	-0.0213048	0.536047
SH3BGRL3	0.144003	0.0515213	0.0350588	0.737486
B4GALNT3	-0.0778765	0.0515281	-0.000870604	0.981639
PLEKHA1	-0.0886652	0.0516052	0.00664626	0.857335
AMEX60DD023141	-0.420596	0.0516698	0.120643	0.327477
TKT	-0.176985	0.0517452	-0.00547756	0.921865
ARMC8	-0.0640983	0.0518053	-0.0105643	0.745638
VLDLR	0.103749	0.0518743	-0.0400664	0.226029
AMEX60DD034560	-1.00453	0.0519126	-0.0999773	0.607669
AMEX60DD037035	3.27869	0.0519312	-0.499247	0.424849
ZBTB48	-0.1143	0.0520111	-0.00484955	0.89581
AMEX60DD029503	-0.69813	0.0520358	-0.189332	0.301882
ATP6V1F	-0.69813	0.0520359	-0.128211	0.571097
CIBAR1	-0.0805056	0.0520668	-0.0116627	0.735715
FOXO4	-0.158924	0.0520692	-0.00995544	0.844793
ACOX1	-0.192058	0.0520825	0.068043	0.427367
AMEX60DD015791	-1.00556	0.0521121	0.197917	0.48496
AMEX60DD002687	-1.00556	0.0521121	-0.688625	0.0281325
PEBP1	-0.115229	0.0521279	-0.00707916	0.893613
AMEX60DD055582	0.538762	0.0522477	0.174148	0.426621
VWA7	0.174032	0.0522584	-0.0581621	0.26457
BEND3	0.244549	0.0523511	0.0470345	0.559612
AMEX60DD053318	0.168651	0.0526509	0.00562739	0.915985
AMEX60DD008169	0.113379	0.0526718	0.0710802	0.0442835
AMEX60DD031235	0.159118	0.0526774	0.0839659	0.233562
MCM5	0.555752	0.0527185	0.0281012	0.892047
DUSP5	-0.368954	0.052762	-0.258791	0.0927979
AMEX60DD005145	0.25383	0.0527636	-0.0582496	0.607597
ZDHHC24	0.222602	0.0527699	-0.0617786	0.101302
SLC25A29	-0.321193	0.0527855	0.04584	0.654809
AMEX60DD014582	0.575179	0.0529711	0.0788852	0.634194
YPEL3	0.277822	0.053	-0.287778	0.000879794
RAB5B	0.0868924	0.053027	0.0322803	0.232451
SETBP1	-0.116101	0.0531277	0.0520871	0.158649
UBASH3B	-0.1021	0.0531758	-0.0582188	0.297686
OLAH	0.148241	0.0531823	-0.00745989	0.825166
AMEX60DD004370	0.270383	0.053183	0.0820716	0.337791
AMEX60DD054725	-0.317503	0.0531888	-0.0113524	0.893824
AMEX60DD004058	0.263667	0.0532092	-0.03364	0.691886
AMEX60DD049081	0.266941	0.0532143	0.0834757	0.313131
PALM2AKAP2	0.0681743	0.0534175	-0.00710425	0.849914
DPH7	0.11584	0.0534535	0.0184797	0.610706
ADRA1D	0.112159	0.0534996	0.0577394	0.111606
AMEX60DD004009	0.446455	0.0535347	0.0379619	0.784748
AMEX60DD003572	-0.13627	0.0535376	-0.0316925	0.435545
AMEX60DD018344	0.500266	0.0535541	0.140044	0.36766
AMEX60DD020362	-0.159518	0.053689	0.00949029	0.85286
SEL1L3	0.0954812	0.0537003	0.040053	0.217808
RCAN3	-0.122678	0.053759	-0.0404879	0.507546
NELL2	0.10212	0.0538258	0.0564031	0.0527399
TMLHE	0.14694	0.0538274	-0.0761751	0.11077
AMEX60DD033327	0.15296	0.0539077	0.0309897	0.665932
XPNPEP3	-0.105944	0.0540042	-0.101549	0.128583
SDR16C5	0.147446	0.0540907	-0.108767	0.0184359
AMEX60DD043597	-0.44883	0.0542379	-0.100523	0.444829
CCP110	-0.0771251	0.0542622	0.0077812	0.739936
AMEX60DD035191	0.265138	0.0542804	0.00501397	0.951822
AMEX60DD037759	-0.730455	0.054284	0.177753	0.306717
PLXDC1	0.124551	0.054312	0.0620106	0.504979
RBM23	0.0568357	0.0543838	0.0174848	0.524237
AMEX60DD009330	-0.119128	0.0543932	-0.17438	0.0937346
TMEM51	0.193971	0.0544356	-0.090961	0.15335
WDR86	-0.154978	0.0544365	-0.0296801	0.361904
AMEX60DD017437	-1.35348	0.0545227	-0.00937476	0.978161
AMEX60DD038861	-1.35348	0.0545228	0.25366	0.584116
NUP50	-0.120243	0.0545599	0.045783	0.24507
AMEX60DD027337	0.303711	0.054624	0.115921	0.414007
MAST4	-0.302023	0.0547293	-0.024861	0.288732
GMCL1	0.0849422	0.0547333	-0.0172898	0.777035
GABRG2	0.0774967	0.0547655	-0.0473665	0.0513994
PNPO	0.286145	0.0547713	0.129639	0.150148
AMEX60DD019970	-1.13109	0.0548038	-0.302156	0.268817
AMEX60DD013535	-1.13109	0.0548038	-0.290661	0.42684
CCDC68	0.114991	0.0548042	0.0158802	0.776171
PHYH	0.17273	0.0549883	-0.0287096	0.481622
SRSF7	0.226067	0.055014	-0.0739521	0.265118
SLC25A28	-0.234926	0.0550364	-0.164251	0.0372604
AMEX60DD017261	0.133784	0.0550875	-0.0265284	0.513903
AMEX60DD015385	0.158654	0.0551182	0.0362051	0.736204
AMEX60DD015544	-0.2971	0.0551557	-9.69e-05	0.999109
AMEX60DD053171	0.825841	0.0551838	-0.0869142	0.6939
SYP	0.128815	0.0552276	0.0428549	0.428346
MAS1	-0.296149	0.0552338	0.0817825	0.391574
EI24	-0.139902	0.055448	-0.0104187	0.76503
KRTCAP3	0.101481	0.0554913	0.0103596	0.86723
SLC22A16	0.0973677	0.0555189	0.0600091	0.0493241
AMEX60DD002334	0.381861	0.0555305	1.63e-05	0.999894
TENM3	-0.240853	0.0557414	0.0376371	0.431713
PRMT5	-0.100475	0.0558459	-0.0839325	0.0933439
DNER	0.0871387	0.0558794	0.0316564	0.304961
FOXD3	0.634445	0.0559695	0.0149654	0.944988
ZNF839	-0.156749	0.0560576	-0.081536	0.110254
AMEX60DD001894	-0.344797	0.0560758	-0.124214	0.287191
NOL6	0.0822965	0.0560814	-0.020225	0.645187
NAPB	-0.13109	0.0560926	0.0235634	0.568789
ASB17	0.150263	0.0561312	0.0212831	0.651187
AMEX60DD006605	0.138051	0.0562071	-0.00199587	0.96704
CNIH1	-0.164553	0.0562238	-0.05785	0.258898
VPS13A	-0.246567	0.0562271	-0.0378857	0.328631
FMN2	0.0916194	0.0562554	-0.0270119	0.252165
VMAC	-0.180843	0.056262	0.12181	0.0309796
PARL	-0.129495	0.0562845	-0.0220411	0.6982
QRICH1	-0.111997	0.0563112	-0.113119	0.0372098
ITGB8	0.112953	0.0563213	0.00870047	0.807627
AMEX60DD016817	0.145505	0.0564564	0.0434468	0.459561
SETD3	-0.0860021	0.0564756	0.0194879	0.478267
CFAP206	-0.164672	0.056485	-0.0867203	0.16359
AMEX60DD036938	0.605876	0.0564891	-0.150063	0.422302
RORA	0.116249	0.0565178	0.0796361	0.324515
TCEA2	-0.188873	0.0565308	-0.0460505	0.279323
PCYT1B	0.176753	0.0565467	-0.0157031	0.634828
ATXN2	-0.0970284	0.0565894	-0.032459	0.309769
NOCT	0.356356	0.0566662	0.1774	0.210978
ZCCHC9	-0.268593	0.0567075	0.0518986	0.573592
AMEX60DD033085	0.101055	0.0568126	0.00305426	0.923725
AMEX60DD016140	1.6968	0.056858	0.409779	0.339584
CDKAL1	0.0611735	0.0569132	-0.0121299	0.630694
CNIH4	-0.215068	0.0569232	0.107528	0.124207
LMAN2L	0.142962	0.0570023	-0.075648	0.093268
MCM6	0.136122	0.0570203	0.00772889	0.788278
AMEX60DD035726	-0.169637	0.0570291	-0.0577177	0.314572
PCP2	0.101458	0.0570856	-0.0187835	0.665648
AMEX60DD003326	1.56935	0.0571067	0.11873	0.813221
AMEX60DD053361	1.56935	0.0571069	-0.21666	0.531364
AMEX60DD000738	1.56935	0.0571069	-0.149305	0.679495
SLC29A3	0.115098	0.057123	-0.028316	0.4416
SCLY	-0.111082	0.057126	-0.0451812	0.343408
HBEGF	0.291009	0.0571907	-0.00941884	0.888532
PIK3R1	0.190838	0.0572197	0.047866	0.448657
CLDN14	-1.66612	0.0573198	-0.0184712	0.971591
VAV2	0.106305	0.0573227	0.129199	0.000189705
AMEX60DD028814	0.179804	0.0573643	-0.0369687	0.641372
AMEX60DD035373	0.180344	0.0573678	0.000106274	0.99781
MCIDAS	0.502128	0.0574698	0.172341	0.0588436
ACO1	-0.10868	0.0574854	-0.0570928	0.097435
AMEX60DD027019	0.129316	0.0574986	-0.0487744	0.26437
PDE4DIP	0.0682343	0.0575321	0.0568707	0.165337
AMEX60DD020514	1.0913	0.0576126	0.759188	0.0187434
NAALADL2	0.0831053	0.0576644	-0.0466013	0.353827
ZNF484	0.20213	0.0579102	-0.0143354	0.846121
CXCL12	0.177942	0.057973	-0.000109576	0.99849
ALMS1	0.12583	0.0581095	-0.0242501	0.552795
AMEX60DD031571	0.166441	0.058177	0.142023	0.0480164
FOXD1	-0.376667	0.0582425	0.169297	0.18015
AMEX60DD011131	-0.170387	0.0583356	-0.0930514	0.0825723
PATJ	-0.0649634	0.0584121	-0.0349936	0.218893
AMEX60DD036792	-0.326485	0.0584351	0.0517313	0.634054
NHSL1	-0.147534	0.0584381	0.00385267	0.908112
AMEX60DD044731	0.217199	0.0584885	-0.00164738	0.976643
SCRN3	-0.0812488	0.0584899	0.0029852	0.909245
AMEX60DD005885	0.121316	0.0585208	0.0757781	0.313976
AMEX60DD009711	0.116612	0.058538	0.058026	0.482379
NPFF	-0.202841	0.0586277	0.134018	0.033117
OGFR	-0.157562	0.0586554	-0.114442	0.0923536
LYRM9	-0.221139	0.0587016	-0.0780958	0.311717
PKD1L1	0.0645155	0.0587228	-0.000648719	0.974923
AMEX60DD008942	0.261228	0.0587336	0.124639	0.103512
SPECC1L	-0.0812046	0.0587392	-0.0229047	0.656698
AMEX60DD046052	0.128451	0.0587612	0.00199507	0.962465
AMEX60DD048008	0.268006	0.0587619	-0.0754502	0.390036
GALR2	0.182242	0.0587634	0.0278872	0.624765
AMEX60DD024772	0.119783	0.0588462	-0.00907705	0.807374
AMEX60DD041541	-0.154174	0.0588837	-0.0130482	0.792466
AMEX60DD025814	0.228731	0.0589598	-0.0358004	0.505398
PSIP1	-0.0823367	0.0589906	-0.0391099	0.145076
AMEX60DD027835	-1.59052	0.0590004	0.134361	0.622371
AMEX60DD031180	-1.59052	0.0590004	-0.38377	0.393589
AMEX60DD008667	-1.59052	0.0590005	0.339096	0.576634
AMEX60DD011605	-1.59052	0.0590005	0.652756	0.204083
AMEX60DD012540	-1.59052	0.0590005	-0.409305	0.420541
AMEX60DD012271	-1.59052	0.0590005	0.0312672	0.946741
AMEX60DD015964	-1.59052	0.0590005	0.0675436	0.923816
AMEX60DD053617	-1.59052	0.0590005	0.18327	0.695797
AMEX60DD006576	0.160676	0.0590585	-0.0856451	0.183858
AMEX60DD028996	0.095386	0.0590589	-0.0163177	0.691705
AMEX60DD053704	0.453873	0.0590792	-0.0370388	0.813485
CELSR3	0.0779353	0.0590939	-0.0635641	0.331161
PHB2	-0.123634	0.0594529	0.0534658	0.31675
TMEM238	0.197611	0.0594992	-0.45045	0.101589
FBP1	-0.317186	0.0595433	0.0591542	0.726621
SUGP2	0.0990569	0.0595525	-0.0268461	0.255923
AMEX60DD014367	0.213621	0.0597307	0.117307	0.0808949
WFDC1	0.0780869	0.0597721	-0.00600898	0.86139
AMEX60DD024832	0.142003	0.0600525	-0.0901729	0.0484633
PPP1R13B	-0.122293	0.0600792	0.0641699	0.0983387
PGGT1B	-0.0991898	0.0603744	-0.00583161	0.858543
GBF1	-0.509601	0.0604089	-0.126418	0.0402658
AMEX60DD027765	-0.457591	0.0604128	-0.182136	0.124333
NTRK2	0.0724145	0.0604602	0.0555703	0.0189703
TOGARAM1	0.588802	0.0604927	0.0186316	0.588708
IL17REL	0.147499	0.0605011	0.0141072	0.620497
AMEX60DD039753	0.193288	0.0605291	0.0337125	0.570308
AMEX60DD031725	-0.414714	0.0605486	0.0254899	0.820428
DBP	0.150602	0.060577	0.0731112	0.214632
FNDC10	0.206728	0.0606644	0.00232555	0.971292
FKBP3	-0.306457	0.0607131	0.0809631	0.407674
AMEX60DD033131	-1.05709	0.0607254	-0.188792	0.75041
AMEX60DD025391	-0.194392	0.060781	-0.00874075	0.884301
EEF1AKMT2	-0.224766	0.0608411	-0.0528932	0.531518
CNTN2	0.134208	0.0610123	0.11021	0.0159407
SLC27A1	0.162869	0.0610126	0.0243097	0.649874
AMEX60DD042296	-0.303151	0.0610448	0.275033	0.046585
AMEX60DD054851	-0.908697	0.0610775	-0.276951	0.522022
AMEX60DD053163	0.13593	0.061174	0.0117767	0.844266
AMEX60DD041412	0.167894	0.0612295	0.0437214	0.609208
RAB3IL1	0.102093	0.0613227	0.00333959	0.918852
E2F6	-0.118563	0.0613661	0.00187895	0.962183
CNPY2	-0.185796	0.0614345	0.0726289	0.220277
AMEX60DD032762	0.7029	0.0614578	0.304286	0.126355
AMEX60DD009953	0.786448	0.0614671	0.286524	0.248693
STX10	-0.178396	0.0614899	0.0384211	0.512439
MAPK13	-0.123846	0.0615469	-0.0580971	0.222015
RNF207	0.126399	0.0615831	0.0322173	0.327918
SERINC5	-0.169071	0.0616933	-0.067897	0.149557
AMEX60DD021981	-2.13109	0.0616958	-0.00826114	0.980486
AMEX60DD041011	-2.13109	0.0616958	0.0312672	0.948159
AMEX60DD018064	-2.13109	0.0616958	-0.553695	0.207212
AMEX60DD028603	-2.13109	0.0616958	0.130803	0.807247
AMEX60DD013880	-2.13109	0.0616958	-0.0231806	0.953369
AMEX60DD019563	-2.13109	0.0616959	-0.38377	0.546341
AMEX60DD055154	-2.13109	0.0616959	-0.248841	0.632708
AMEX60DD036953	-2.13109	0.0616959	0.0156645	0.980133
AMEX60DD040452	-2.13109	0.0616959	-0.0561956	0.910959
AMEX60DD009676	-2.13109	0.0616959	1.22366	0.329273
AMEX60DD045699	-2.13109	0.061696	0.201192	0.774114
RCOR2	-0.140951	0.0616983	-0.0138749	0.756618
PIGT	-0.112296	0.0618093	-0.0593111	0.179418
SLC66A2	-0.117389	0.0619005	-0.0295579	0.428442
AMEX60DD035599	0.108361	0.0619284	-0.0295466	0.630466
NEFH	-0.178813	0.0620254	-0.00744986	0.896599
AMEX60DD056734	-0.2397	0.0621073	0.01517	0.842192
TECPR2	-0.0860828	0.0621077	-0.0883905	0.0363225
BCAM	0.137789	0.0621412	-0.0587401	0.183896
AMEX60DD038636	0.277375	0.0621741	0.0333047	0.78524
TRIM59	0.188478	0.0622145	0.0802217	0.0663618
CCDC85A	0.138948	0.0623614	-0.0206498	0.732943
PAK2	0.138948	0.0623615	-0.00804571	0.865869
AMEX60DD009685	-1.23062	0.0623888	-0.188099	0.628698
AMEX60DD034875	-1.23062	0.0623888	0.0684665	0.8697
AMEX60DD024871	-1.23062	0.0623888	0.995105	0.550277
CLIP1	-0.0703411	0.0624553	-0.0246808	0.624216
AMEX60DD001045	0.293795	0.0624931	-0.221931	0.0205355
AMEX60DD010584	0.227597	0.0625772	-0.0171174	0.818838
AMEX60DD045030	0.113456	0.0625781	-0.0549495	0.125998
PRKDC	-0.444248	0.0625917	-0.0491006	0.823838
SETDB1	-0.0697722	0.0626482	0.0119968	0.706095
ADGRV1	0.0751993	0.0626678	-0.00128623	0.934121
C19ORF12	-0.162974	0.0627107	-0.0641608	0.238509
AMEX60DD034885	0.518003	0.0627302	0.00880666	0.966359
ROCK2	-0.070472	0.0627558	0.00750305	0.816846
AMEX60DD049436	-0.481933	0.0630113	0.132939	0.23935
PDCL2	0.0772867	0.0630544	-0.0167968	0.667302
MYO3B	0.0780776	0.063065	-0.00836488	0.75913
GPC6	0.224521	0.0631347	-0.0681767	0.0476277
WDR5	0.114649	0.0632559	-0.047497	0.220956
STX1B	0.0968073	0.0632964	0.0170383	0.545075
PELI2	0.322821	0.0634832	-0.0927215	0.41234
MAPK8IP3	-0.341078	0.0634846	-0.0309699	0.652394
AMEX60DD007539	0.175063	0.0635036	-0.0670757	0.484077
AMEX60DD042611	1.74338	0.0635552	0.146744	0.79943
AMEX60DD043863	1.74338	0.0635552	-0.711976	0.389876
NONO	1.74338	0.0635552	0.104265	0.606681
AMEX60DD018893	1.74338	0.0635552	-0.669172	0.144352
AMEX60DD039321	1.74338	0.0635553	0.121465	0.736412
AMEX60DD015938	1.74338	0.0635554	-0.553695	0.347169
AMEX60DD040895	1.74338	0.0635554	0.0246268	0.967184
CUX2	0.0611535	0.0635722	0.0356264	0.248082
UBXN6	-0.151729	0.0635728	-0.028702	0.475456
PLPPR4	0.15411	0.0636036	-0.0312947	0.623185
B3GNT7	-0.188093	0.0636079	0.0592034	0.47423
SYVN1	-0.082459	0.0636437	-0.0716867	0.0393314
AMEX60DD020551	0.188452	0.0636948	0.0536543	0.370449
USP4	-0.066684	0.0637472	-0.0450417	0.152359
AMEX60DD032916	-0.388586	0.0637621	0.02442	0.894585
AMEX60DD038596	0.182613	0.0637902	0.0290322	0.60916
ZNF335	0.0724136	0.0638038	0.0238838	0.442677
AMEX60DD038133	0.378382	0.0638521	-0.0718263	0.852316
FZD4	-0.435944	0.0639721	0.216974	0.472057
VWF	0.0662899	0.0640007	0.0387331	0.0734814
AMEX60DD002847	0.108812	0.0640133	0.00547722	0.860151
SSBP3	-0.149268	0.0640462	-0.0327666	0.407711
YIPF1	-0.168341	0.0641341	-0.00691966	0.896427
PAXIP1	-0.152186	0.0642432	0.0026895	0.93935
ERMARD	-0.0610132	0.0642947	-0.0535748	0.264755
AMEX60DD021199	-0.163633	0.0643515	-0.0136564	0.794848
WDR48	-0.0705696	0.0643641	-0.0322365	0.512522
TMEM117	0.060278	0.0644795	0.0440371	0.212056
MYCBP2	-0.0954984	0.0644874	-0.0308395	0.0374655
PTGIS	0.0913025	0.0645655	-0.00144153	0.976622
TMEM82	0.170504	0.0645663	0.0920246	0.514808
AMEX60DD004514	0.596831	0.0646158	-0.274541	0.0895384
PPIH	-0.123363	0.0646968	-0.0592658	0.152963
NXN	-0.0777586	0.0647473	-0.0217697	0.32337
PRPF8	-0.104475	0.0647618	-0.0560414	0.109144
TRMT6	0.092098	0.0647683	-0.0105648	0.791894
RNF167	-0.105216	0.064786	-0.0444355	0.405554
BLMH	0.273108	0.0648507	0.0301055	0.642192
LECT2	0.367123	0.064851	0.108879	0.408148
PTGER4	-0.563815	0.0648571	-0.0793383	0.530161
SNX17	-0.129388	0.0648671	-0.0280523	0.517804
GEMIN5	-0.0946813	0.064967	-0.000161751	0.994016
NUDT22	0.107097	0.0649689	0.0196029	0.578743
AMEX60DD015131	0.213493	0.0649705	0.0588216	0.570534
AMEX60DD048524	0.114475	0.064997	0.0113557	0.854597
AMEX60DD008544	-0.537715	0.0650049	-0.144051	0.331981
MRPS18C	-0.152359	0.0650305	0.0880664	0.0867719
AMEX60DD020184	-0.256117	0.0650436	-0.0526655	0.680373
SLC16A3	-0.163942	0.065111	0.0744559	0.166674
AMEX60DD008554	0.46259	0.0651574	-0.111337	0.487864
AMEX60DD019030	0.319572	0.0651918	0.0237336	0.819917
AMEX60DD009656	0.319572	0.0651918	0.118098	0.238259
CCDC177	0.424429	0.0652243	0.0825685	0.54389
TMEM268	0.102507	0.0652271	0.0181716	0.574878
IMPA1	-0.13109	0.0652958	-0.0271621	0.684245
AMEX60DD023427	0.245286	0.0653461	0.157321	0.0385285
AMEX60DD007389	0.358715	0.065424	-0.054018	0.635133
AMEX60DD022372	-0.868055	0.0654325	1.8883	0.225596
AMEX60DD043711	0.114984	0.0655454	0.0085552	0.883379
ATP1B1	0.247968	0.0655847	-0.121902	0.360577
AMEX60DD043712	0.114989	0.0656029	-0.0292836	0.344659
TOPBP1	-0.0657225	0.0656641	-0.0356159	0.103258
AMEX60DD055892	0.208637	0.0656758	-0.0507441	0.452038
GRIP2	0.0869006	0.0657994	0.037285	0.194756
IARS1	-0.0813346	0.0658042	-0.0411421	0.0915372
AMEX60DD014663	-0.734504	0.0661216	-0.0710945	0.679235
RSBN1	-0.182194	0.0661511	0.00507327	0.935891
RSRC2	-0.117028	0.0661721	-0.103843	0.129202
UNC13D	-0.155273	0.066223	-0.0190398	0.404938
AMEX60DD035489	1.11684	0.0662431	-0.741322	0.0455782
CCDC96	1.11684	0.0662433	0.879264	0.0145547
AMEX60DD043009	0.263541	0.0662509	0.0639334	0.470692
AMEX60DD049272	-0.473482	0.0663092	-0.214268	0.382289
AMEX60DD022140	0.342281	0.0663861	0.0452514	0.696402
FZD3	0.109507	0.0663928	-0.0120478	0.847086
SUPT3H	0.0762149	0.066482	0.00814214	0.744393
GLOD4	0.202036	0.0665023	0.00183924	0.978052
AMEX60DD024417	-0.993586	0.0665524	0.191732	0.573456
CCDC89	-0.993586	0.0665524	0.248079	0.443177
ADAMTS16	0.119616	0.0665845	0.0619002	0.0403148
TRAF5	-0.117478	0.0666515	-0.0532059	0.334853
PHF21A	-0.121901	0.0666916	-0.0128311	0.750743
CCDC17	0.122396	0.0667083	-0.02386	0.55374
RNF145	-0.100738	0.0667894	0.0114361	0.740481
BCL2L13	-0.0976517	0.0667945	-0.0133614	0.679672
AMEX60DD036039	0.676265	0.0669669	0.146744	0.445908
AMEX60DD024430	-0.661604	0.0669888	0.432853	0.109842
ALK	0.927804	0.067067	-0.0334627	0.315656
AMEX60DD024410	0.927804	0.067067	-0.219276	0.393545
AMEX60DD005471	0.927804	0.0670671	-0.0152754	0.952997
ASH1L	-0.0529953	0.0670683	-0.054253	0.073303
KCNJ10	0.105684	0.0670932	-0.0534782	0.227145
WDR66	-0.0797712	0.0671526	-0.0175548	0.63317
MAN2B1	-0.139094	0.0671665	0.0370003	0.300551
SFPQ	-0.468125	0.0672217	0.0396307	0.798635
ARV1	-0.1137	0.067237	-0.0330509	0.369269
AMEX60DD033259	0.299889	0.0672449	0.0312672	0.714935
FAM81B	0.0907773	0.0673502	-0.00103811	0.972877
ZNF180	1.00641	0.067384	0.0432594	0.326249
CRTAC1	0.0419463	0.0674798	-0.0329964	0.119965
ZDHHC3	-0.144285	0.0675093	-0.0624401	0.115421
AMEX60DD018480	0.179013	0.0675831	0.0446157	0.561145
HAL	0.183103	0.0676604	0.0535623	0.357316
PHKA2	0.084661	0.0676982	-0.00401144	0.950254
AMEX60DD015520	-0.229868	0.067843	0.171928	0.0261716
STK31	-0.0874047	0.0679066	0.0287009	0.695573
AMEX60DD024758	-0.104039	0.0681109	-0.0378112	0.281144
AMEX60DD021623	0.288914	0.0681178	-0.136005	0.393403
MPPED1	0.0839594	0.0681256	0.0725152	0.284317
PREX1	0.06797	0.068132	0.00960757	0.751952
AMEX60DD012315	0.368481	0.0682674	-0.177996	0.195829
ITGB1	0.115876	0.0684862	0.00136072	0.980216
AMEX60DD050998	0.376514	0.0684932	-0.0430266	0.737632
AMEX60DD034961	0.198125	0.0685128	0.0928804	0.180331
SLC3A1	0.156622	0.0685661	0.0906384	0.0752696
AMEX60DD002652	0.165892	0.0685859	0.0605154	0.261967
AMEX60DD025747	0.313212	0.0686758	0.111438	0.30024
AMEX60DD020457	0.143722	0.0686798	-0.00404367	0.936946
AMEX60DD041252	-3.54074	0.0687751	2.60904	0.0986708
ZNF182	-0.514418	0.0688406	-0.0996268	0.504169
UTS2R	-0.514418	0.0688407	-0.0909885	0.580929
GGH	0.138517	0.0688431	-0.0276541	0.531651
ULK3	0.0996122	0.0688612	0.0317113	0.488505
AMEX60DD034653	0.132614	0.0688672	-0.0291713	0.649957
HERC6	0.343705	0.068896	0.00820337	0.970988
AMEX60DD018930	-0.406724	0.0689505	0.348656	0.012857
SNX29	-0.0483479	0.0689662	-0.0419529	0.0098982
AMEX60DD046402	0.605876	0.06899	-0.133478	0.453865
PAK1	0.0836322	0.0689936	0.0684541	0.497551
AMEX60DD019848	-0.123141	0.0690379	0.00419271	0.947577
DPYS	0.122009	0.0690435	-0.142238	0.204126
PLEKHM3	0.0698064	0.0692193	0.0267349	0.502513
SPSB3	-0.153305	0.0692878	0.00511495	0.922925
AMEX60DD055889	-1.39412	0.0694588	0.0770709	0.83212
AMEX60DD014709	-1.39412	0.0694588	0.306427	0.542966
AMEX60DD006254	-1.39412	0.0694588	-0.209741	0.615763
AMEX60DD036414	-1.39412	0.0694588	-0.220272	0.605991
GYPC	0.156864	0.069491	-0.0410369	0.250011
AMEX60DD037828	-0.831529	0.0696856	0.300454	0.336316
LRP1	0.145286	0.0697663	-0.0188585	0.579041
SIN3A	-0.0868341	0.0697994	-0.0358362	0.165552
CREB3L2	-0.144265	0.069927	0.0336976	0.617085
COG2	0.151844	0.069988	-0.0270833	0.621278
CCDC27	0.09213	0.0700654	-0.031903	0.295564
AMEX60DD024661	2.03877	0.0700987	0.320774	0.620824
AMEX60DD016193	2.03877	0.0700988	0.0312672	0.959463
AMEX60DD002409	2.03877	0.0700988	0.0312672	0.954274
AMEX60DD039650	2.03877	0.0700988	-0.606163	0.325404
AMEX60DD033618	2.03877	0.0700989	0.0312672	0.957662
AMEX60DD042182	2.03876	0.0700989	-0.776088	0.224838
AMEX60DD006417	2.03876	0.0700989	0.0312672	0.957662
AMEX60DD037377	2.03876	0.070099	-0.553695	0.303093
C11ORF65	-0.114475	0.0701219	0.0777373	0.0406468
ZPLD1	0.217071	0.0701335	-0.0289256	0.183701
[truncated: 28,922 more rows]

## Sheet: S2.3 Id'd Unmapped Regions
Supplemental Data Table 2.3: Unmapped Regions
Gene Name	LW->Mat Log2FC	LW->Mat p-values	ND->LW Log2FC	ND->LW p-values
AMEX60DD000005	-0.146197	0.0476405	-0.0185175	0.819297
AMEX60DD000008	0.0913028	0.843807	0.0312672	0.893026
AMEX60DD000009	-1.13109	0.365307	0.355355	0.542542
AMEX60DD000011	-0.42783	0.272523	-0.306505	0.0426989
AMEX60DD000012	0.131945	0.879947	0.446305	0.321128
AMEX60DD000013	-0.28187	0.123707	-0.107574	0.50549
AMEX60DD000014	0.868841	0.486108	-1.18176	0.49997
AMEX60DD000015	-0.411197	0.42968	-0.213487	0.562811
AMEX60DD000017	-1.71605	0.14517	-1.10624	0.155126
AMEX60DD000018	0.131945	0.735568	0.298161	0.433159
AMEX60DD000019	-0.716051	0.586646	0.345186	0.670349
AMEX60DD000022	1.698	0.275862	0.768233	0.465908
AMEX60DD000023	-0.868052	0.409999	1.2943	0.0919046
AMEX60DD000024	-1.02681	0.509503	0.924352	0.171724
AMEX60DD000025	0	1	0.15662	0.85958
AMEX60DD000032	-1.61171	0.26393	0.516694	0.54077
AMEX60DD000037	0	1	0.995105	0.550277
AMEX60DD000041	-1.02681	0.509504	-0.290661	0.763922
AMEX60DD000043	0.736211	0.636605	-0.553695	0.552132
AMEX60DD000064	0.0649753	0.679125	0.147364	0.0878094
AMEX60DD000066	-0.211508	0.187869	-0.0996463	0.330991
AMEX60DD000070	-0.323735	0.385861	-0.176841	0.494325
AMEX60DD000071	-1.02681	0.509503	-0.258239	0.690449
AMEX60DD000077	-0.453018	0.507979	0.0312672	0.910336
AMEX60DD000078	0.802341	0.630066	0.926508	0.552132
AMEX60DD000079	0.0551633	0.424413	0.0148861	0.717122
AMEX60DD000080	1.73621	0.208766	0.709339	0.388436
AMEX60DD000083	2.05813	0.125421	0.0312672	0.965426
AMEX60DD000089	0.802347	0.630063	1.92651	0.163097
AMEX60DD000090	1.32117	0.359786	0.0333093	0.984047
AMEX60DD000091	-0.131089	0.91139	0.11873	0.813221
AMEX60DD000092	0.736208	0.636607	-0.191125	0.811788
AMEX60DD000093	0.868843	0.486108	2.4463	0.00703608
AMEX60DD000094	0.483861	0.0269435	0.0381102	0.784501
AMEX60DD000096	0.0332106	0.704402	0.0186119	0.735818
AMEX60DD000098	0.868912	0.394348	-0.81673	0.310128
AMEX60DD000100	0.868843	0.486108	0.0312672	0.975549
AMEX60DD000101	0.73621	0.636606	0.0333093	0.984047
AMEX60DD000105	0.0553235	0.880245	0.284699	0.288396
AMEX60DD000113	-0.0363805	0.671561	-0.0156805	0.73774
AMEX60DD000116	-1.6117	0.26393	-1.96873	0.0843248
AMEX60DD000118	0.28395	0.796641	-0.646804	0.431619
AMEX60DD000120	-1.12124	0.500907	-0.928486	0.577285
AMEX60DD000125	-0.131088	0.885763	1.35319	0.112865
AMEX60DD000130	-0.0486277	0.752638	0.0693165	0.582595
AMEX60DD000135	-1.12124	0.500907	1.51147	0.29479
AMEX60DD000139	0	1	1.51147	0.29479
AMEX60DD000140	-0.0286069	0.855458	-0.0720314	0.428773
AMEX60DD000154	1.67619	0.146562	0.497133	0.325203
AMEX60DD000156	2.28296	0.11355	-1.86193	0.177665
AMEX60DD000157	0.301752	0.820086	0.265651	0.670894
AMEX60DD000158	0.868909	0.394349	-0.669172	0.301971
AMEX60DD000162	1.32117	0.359786	0.037252	0.986581
AMEX60DD000165	0	1	-0.861931	0.580176
AMEX60DD000168	-0.137516	0.153237	-0.0421387	0.489487
AMEX60DD000175	1.67619	0.146562	-0.113123	0.804408
AMEX60DD000176	1.4538	0.216313	-0.290661	0.602927
AMEX60DD000177	0.676265	0.290217	0.509314	0.15409
AMEX60DD000182	0.102486	0.839662	0.0756793	0.834856
AMEX60DD000185	-0.831529	0.199613	-0.320205	0.370833
AMEX60DD000187	-0.161463	0.585485	-0.270875	0.270205
AMEX60DD000189	-0.159444	0.923749	0.0333093	0.984047
AMEX60DD000190	0.37587	0.384274	-0.245573	0.36361
AMEX60DD000192	-1.63439	0.254386	0.29387	0.804973
AMEX60DD000194	-1.12124	0.500907	1.51147	0.29479
AMEX60DD000196	-0.131152	0.92748	-2.44689	0.0631778
AMEX60DD000197	-1.13109	0.200445	-0.0561956	0.910959
AMEX60DD000199	0.118123	0.340728	0.0413985	0.443867
AMEX60DD000200	0.112122	0.274211	0.0527403	0.2307
AMEX60DD000202	0.22661	0.841777	-0.115574	0.758638
AMEX60DD000203	2.31619	0.592378	0.0312672	0.978824
AMEX60DD000204	-0.131156	0.927477	0.294302	0.736203
AMEX60DD000205	0	1	-0.705698	0.502985
AMEX60DD000206	1.10213	0.299046	0.0818933	0.830355
AMEX60DD000207	0.0637264	0.768764	0.135498	0.492583
AMEX60DD000208	-0.131156	0.927477	1.4907	0.0767795
AMEX60DD000212	1.03883	0.230815	-0.0827759	0.907329
AMEX60DD000213	0.802341	0.630066	-2.44689	0.0631778
AMEX60DD000214	-0.073951	0.938255	-0.705698	0.0581612
AMEX60DD000220	-0.791539	0.332693	0.0687419	0.834418
AMEX60DD000221	2.698	0.0507872	-0.290661	0.763922
AMEX60DD000222	-1.12124	0.500905	-0.258239	0.690449
AMEX60DD000227	0.736212	0.636605	0.0333093	0.984047
AMEX60DD000228	-0.0953301	0.284624	-0.0319903	0.568563
AMEX60DD000231	0.0725991	0.416058	-0.0256189	0.627216
AMEX60DD000233	-1.12124	0.500907	-0.191125	0.811788
AMEX60DD000234	-0.546126	0.620153	-0.705698	0.343516
AMEX60DD000235	0.416398	0.164866	-0.00909052	0.957513
AMEX60DD000238	-2.39194	0.581725	0.168771	0.788901
AMEX60DD000239	-0.0245783	0.603974	-0.0126701	0.665112
AMEX60DD000242	-1.12124	0.500907	0.61623	0.639852
AMEX60DD000246	0.200986	0.337643	0.0126296	0.940129
AMEX60DD000248	0	1	-0.968733	0.438132
AMEX60DD000249	0.736211	0.636605	2.51147	0.0565242
AMEX60DD000258	0.868845	0.486107	-0.258239	0.690449
AMEX60DD000262	0	1	0.61623	0.508151
AMEX60DD000263	-2.02674	0.142294	0.223912	0.764266
AMEX60DD000271	0.0313281	0.879022	-0.114652	0.246996
AMEX60DD000277	-1.13109	0.365307	0.409779	0.499499
AMEX60DD000325	-1.12124	0.500906	-0.968732	0.438132
AMEX60DD000339	0.388778	0.0158599	-0.260196	0.0578454
AMEX60DD000343	0.283947	0.796642	0.223912	0.671494
AMEX60DD000356	1.698	0.275862	0.0312672	0.972664
AMEX60DD000360	-1.12124	0.500906	-0.290661	0.763922
AMEX60DD000361	-0.0315539	0.953067	-0.37263	0.116062
AMEX60DD000365	0.177908	0.791659	-0.428164	0.201457
AMEX60DD000366	0.453873	0.550565	0.0494748	0.941874
AMEX60DD000368	0	1	-0.861817	0.202583
AMEX60DD000369	-0.716052	0.586646	0.924352	0.171724
AMEX60DD000372	0.761995	0.259896	-0.110077	0.852783
AMEX60DD000375	1.0913	0.273001	0.379998	0.671148
AMEX60DD000377	1.698	0.275862	-0.331303	0.648619
AMEX60DD000379	-0.13109	0.855795	0.437892	0.132923
AMEX60DD000380	1.698	0.275861	-0.443772	0.80254
AMEX60DD000381	0.217548	0.574813	0.240307	0.442849
AMEX60DD000382	1.698	0.275861	-0.38377	0.727624
AMEX60DD000383	0.802295	0.855555	0.353195	0.605772
AMEX60DD000386	2.698	0.0507872	-1.38377	0.156551
AMEX60DD000387	1.698	0.275861	-2.82372	0.0409249
AMEX60DD000401	-2.34867	0.080338	-0.968732	0.342311
AMEX60DD000403	0.226804	0.231787	0.082714	0.476498
AMEX60DD000408	0.494735	0.690989	-0.968732	0.179289
AMEX60DD000411	0.0986244	0.466708	-0.0685928	0.238937
AMEX60DD000418	0.0913028	0.909434	-0.675002	0.108309
AMEX60DD000419	0.131945	0.879947	-1.55369	0.0370253
AMEX60DD000422	-0.13109	0.911389	0.223912	0.764266
AMEX60DD000423	1.74239	0.482118	-0.231767	0.707516
AMEX60DD000425	-1.13109	0.365307	-0.191125	0.811788
AMEX60DD000426	0.80234	0.630066	0.683344	0.327256
AMEX60DD000427	-1.13109	0.116876	0.0336378	0.958988
AMEX60DD000428	-1.12124	0.500907	0.0333093	0.984047
AMEX60DD000429	0.355321	0.675111	-0.0682684	0.898673
AMEX60DD000430	0.0388359	0.955821	0.612322	0.445399
AMEX60DD000435	0.123724	0.552923	-0.261077	0.213344
AMEX60DD000443	-1.12124	0.500906	0.879264	0.274541
AMEX60DD000445	-0.00659132	0.930485	-0.0164893	0.718219
AMEX60DD000446	0.86891	0.228371	-0.0193588	0.959608
AMEX60DD000447	-0.224741	0.888821	0.0312672	0.942697
AMEX60DD000449	0.0137061	0.812752	0.0208175	0.733773
AMEX60DD000452	-0.131089	0.91139	0.330758	0.813143
AMEX60DD000454	0.605875	0.416074	-0.180237	0.689966
AMEX60DD000455	-0.868054	0.409998	-0.161378	0.759867
AMEX60DD000456	1.32117	0.359789	0.905736	0.216082
AMEX60DD000463	-0.13109	0.570409	-0.022172	0.873128
AMEX60DD000466	0.802341	0.630066	-0.316656	0.58592
AMEX60DD000468	-1.12124	0.500906	2.24843	0.094112
AMEX60DD000478	-0.359298	0.804428	-0.620809	0.208154
AMEX60DD000481	-0.159445	0.923749	-0.861931	0.580176
AMEX60DD000493	0.736206	0.636607	0.294302	0.633769
AMEX60DD000494	0.0304937	0.802464	0.0197811	0.848209
AMEX60DD000502	0.453805	0.730041	0.129535	0.826164
AMEX60DD000503	-0.394123	0.651881	-0.561404	0.448203
AMEX60DD000506	0.131945	0.793628	-0.1953	0.608463
AMEX60DD000508	-0.159448	0.923747	-0.705698	0.502985
AMEX60DD000513	-0.232019	0.336555	0.246996	0.0869827
AMEX60DD000517	-1.12124	0.500907	-0.0282791	0.987197
AMEX60DD000531	-0.13109	0.897752	0.0312672	0.952671
AMEX60DD000534	0.736209	0.636606	1.92651	0.163097
AMEX60DD000540	0.255933	0.281639	-0.0794798	0.58625
AMEX60DD000541	0.736211	0.636605	-0.454159	0.590838
AMEX60DD000542	-1.05389	0.349094	-0.442664	0.320908
AMEX60DD000551	0.868842	0.486108	-0.191125	0.811788
AMEX60DD000553	0.189207	0.193539	0.097105	0.275155
AMEX60DD000556	-0.13109	0.897751	0.330827	0.53913
AMEX60DD000557	0.0152996	0.912154	0.0018961	0.986314
AMEX60DD000578	0.736214	0.636604	0.353195	0.715148
AMEX60DD000584	-0.159443	0.92375	-1.84098	0.274034
AMEX60DD000588	-0.119757	0.492421	-0.0602663	0.431634
AMEX60DD000589	-0.174811	0.486436	-0.0479264	0.822597
AMEX60DD000590	0.607327	0.626533	0.796802	0.165791
AMEX60DD000600	-0.177383	0.145418	-0.100523	0.589007
AMEX60DD000606	0.283948	0.439473	-0.193799	0.386853
AMEX60DD000621	0.73621	0.636606	-0.178568	0.893799
AMEX60DD000622	-1.71605	0.14517	-0.606163	0.325404
AMEX60DD000623	0.164366	0.492046	0.132196	0.43873
AMEX60DD000629	-0.181716	0.178744	0.0427263	0.599297
AMEX60DD000635	-0.00143778	0.985124	-0.0298702	0.502331
AMEX60DD000637	-0.159445	0.923749	-0.620809	0.373463
AMEX60DD000649	-0.131152	0.92748	0.0312672	0.978824
AMEX60DD000654	0.224391	0.174172	0.102128	0.289525
AMEX60DD000656	0.0250323	0.84019	0.0901087	0.138075
AMEX60DD000657	0.11935	0.450194	0.0621421	0.600094
AMEX60DD000663	0.453806	0.73004	-0.483306	0.49664
AMEX60DD000664	-1.9886	0.201441	0.0312672	0.975549
AMEX60DD000671	-1.02681	0.509503	-1.19112	0.231523
AMEX60DD000674	-0.0188804	0.876383	-0.0987933	0.177542
AMEX60DD000677	0.0746682	0.237644	0.00689028	0.894602
AMEX60DD000690	0.0947416	0.162794	0.0556195	0.168862
AMEX60DD000693	0.453808	0.730039	-0.553695	0.466494
AMEX60DD000698	0.00238226	0.976295	-0.0549696	0.495515
AMEX60DD000707	-0.159445	0.923749	1.03127	0.409143
AMEX60DD000710	-1.71605	0.14517	0.320774	0.620824
AMEX60DD000714	-0.67587	0.723627	-0.928486	0.577285
AMEX60DD000715	0.250257	0.0223113	-0.083884	0.098725
AMEX60DD000719	0.736211	0.636605	0.994613	0.630885
AMEX60DD000720	0.453807	0.730039	0.838622	0.353711
AMEX60DD000721	-0.71605	0.586647	-0.428164	0.523015
AMEX60DD000723	-1.61171	0.263929	0.606325	0.525116
AMEX60DD000726	-0.546126	0.620153	-0.727725	0.149325
AMEX60DD000727	-0.0156122	0.978434	-0.089027	0.830875
AMEX60DD000737	-0.159447	0.923748	-0.88627	0.136166
AMEX60DD000738	1.56935	0.0571069	-0.149305	0.679495
AMEX60DD000750	-0.141737	0.418717	0.0608575	0.739336
AMEX60DD000782	-1.02681	0.509503	-0.705698	0.502985
AMEX60DD000783	1.34166	0.692755	-1.44689	0.315904
AMEX60DD000784	-1.02681	0.509503	-0.161378	0.828885
AMEX60DD000786	-0.159449	0.923747	-0.38377	0.727624
AMEX60DD000787	0	1	-0.191125	0.811788
AMEX60DD000788	-1.61171	0.263929	0.0312672	0.965426
AMEX60DD000790	-1.12124	0.500907	-1.30292	0.592213
AMEX60DD000791	0	1	2.8883	0.0365243
AMEX60DD000792	0	1	0.61623	0.295436
AMEX60DD000793	0.453806	0.73004	-0.968733	0.220222
AMEX60DD000796	-0.13109	0.897752	-0.21666	0.658058
AMEX60DD000797	-0.159444	0.923749	0.995105	0.550277
AMEX60DD000798	-0.131089	0.91139	0.0312672	0.975549
AMEX60DD000799	-1.02681	0.509503	-1.19113	0.0906406
AMEX60DD000800	0.00867312	0.916515	0.00666525	0.89469
AMEX60DD000801	0.0564753	0.495639	-0.102945	0.328088
AMEX60DD000806	-0.140671	0.283935	-0.0579006	0.624001
AMEX60DD000816	-0.131088	0.897753	0.00622459	0.993364
AMEX60DD000818	-0.574696	0.0324949	0.00878321	0.952374
AMEX60DD000822	1.13194	0.140477	-0.126274	0.745882
AMEX60DD000823	-0.117049	0.244815	-0.035847	0.556997
AMEX60DD000827	-0.0733166	0.256143	-0.0503956	0.409326
AMEX60DD000829	0.383484	0.350181	-0.0379954	0.882988
AMEX60DD000835	-1.45301	0.228674	-0.231767	0.707516
AMEX60DD000836	-0.159447	0.923748	0.168771	0.788901
AMEX60DD000837	-1.9886	0.201441	-1.82373	0.241864
AMEX60DD000844	-0.0751162	0.262145	0.00866729	0.885848
AMEX60DD000858	-1.02417	0.129956	0.304286	0.444678
AMEX60DD000863	0.736212	0.636605	0.926507	0.552132
AMEX60DD000865	-1.02681	0.509504	0.0312672	0.975549
AMEX60DD000866	0.520987	0.455125	0.0818933	0.830355
AMEX60DD000867	0.261649	0.0810695	-0.105174	0.241002
AMEX60DD000868	-0.159446	0.923748	-0.331303	0.648619
AMEX60DD000869	0.336689	0.0147809	-0.0178176	0.836517
AMEX60DD000870	-1.12124	0.500905	1.83862	0.111947
AMEX60DD000871	-1.02681	0.509502	0.0312672	0.965426
AMEX60DD000872	0.736208	0.636606	-1.70582	0.0726514
AMEX60DD000873	2.05814	0.125421	-0.149305	0.770178
AMEX60DD000874	0.0227155	0.918599	-0.0720435	0.586562
AMEX60DD000877	-1.02681	0.509504	-3.82372	0.0028938
AMEX60DD000878	1.698	0.275863	0.0312672	0.975549
AMEX60DD000879	0.154495	0.114148	-0.0260905	0.536315
AMEX60DD000882	-1.9886	0.201441	0.0312672	0.975549
AMEX60DD000883	-0.159449	0.923747	1.03127	0.409143
AMEX60DD000885	-0.159447	0.923748	-0.331303	0.648619
AMEX60DD000886	-1.71605	0.14517	-0.558445	0.620071
AMEX60DD000887	-0.0583335	0.33655	-0.0434816	0.23063
AMEX60DD000889	0.86891	0.164252	-0.168293	0.717784
AMEX60DD000890	0.605875	0.565254	-0.606163	0.325404
AMEX60DD000893	-1.61171	0.263929	-0.161378	0.759867
AMEX60DD000894	0.802346	0.630064	-1.29066	0.284947
AMEX60DD000895	0.0848185	0.519855	-0.144086	0.0703644
AMEX60DD000908	-0.0149928	0.920128	-0.115371	0.214793
AMEX60DD000910	-0.131089	0.847153	0.0312672	0.921831
AMEX60DD000912	2.698	0.0507871	-0.620809	0.373463
AMEX60DD000916	-0.159455	0.971139	-1.7057	0.0724877
AMEX60DD000918	1.73621	0.208766	0.709339	0.388436
AMEX60DD000929	0.00015497	0.999716	-0.0649481	0.805342
AMEX60DD000931	0.868842	0.486108	1.10166	0.0468704
AMEX60DD000932	0	1	-0.917113	0.810784
AMEX60DD000943	-0.223536	0.194289	0.0755478	0.464109
AMEX60DD000950	0.172302	0.542833	-0.295069	0.280347
AMEX60DD000954	-0.687483	0.129556	-0.165381	0.742805
AMEX60DD000955	-1.45301	0.228674	1.4907	0.0767795
AMEX60DD000957	1.32117	0.359786	-0.290661	0.763922
AMEX60DD000958	-0.00978345	0.970521	0.0312672	0.844879
AMEX60DD000961	-0.0895905	0.316024	-0.152146	0.00532717
AMEX60DD000969	0.240879	0.605125	-0.0618422	0.836335
AMEX60DD000972	-0.00352418	0.947026	-0.044631	0.476614
AMEX60DD000979	0.0233878	0.75575	-0.0557595	0.221092
AMEX60DD000980	0.175129	0.614694	-0.125916	0.454975
AMEX60DD000984	0.868909	0.394349	0.353195	0.465451
AMEX60DD000985	-0.131089	0.897752	0.446305	0.482959
AMEX60DD000986	-2.45262	0.571839	0.446304	0.685448
AMEX60DD000995	-1.98861	0.201441	-1.38377	0.156551
AMEX60DD000999	2.54356	0.0500494	1.03127	0.15282
AMEX60DD001002	0.802342	0.630065	-0.45416	0.590838
AMEX60DD001003	-1.61171	0.263929	1.61623	0.092874
AMEX60DD001006	2.28296	0.11355	-2.18386	0.103947
AMEX60DD001007	-0.34927	0.213975	-0.0228411	0.920776
AMEX60DD001010	-0.11567	0.550573	0.0716653	0.43225
AMEX60DD001014	0.247422	0.683472	0.294302	0.37276
AMEX60DD001016	0.0716637	0.915081	-0.309466	0.520846
AMEX60DD001029	0.531875	0.317397	-0.56737	0.0709802
AMEX60DD001034	0.0241356	0.684721	0.00609938	0.898091
AMEX60DD001036	-0.159444	0.923749	-0.861931	0.580176
AMEX60DD001038	0.247997	0.0725676	0.50973	0.000322358
AMEX60DD001042	0.175888	0.371905	0.00151989	0.989049
AMEX60DD001043	0	1	0.926508	0.552132
AMEX60DD001044	0.802346	0.630064	0.0312672	0.975549
AMEX60DD001045	0.293795	0.0624931	-0.221931	0.0205355
AMEX60DD001047	-0.159444	0.923749	0.899298	0.757721
AMEX60DD001048	0.802343	0.630065	-1.82373	0.241864
AMEX60DD001051	-0.0254796	0.910022	0.152631	0.358943
AMEX60DD001052	-0.00276574	0.983793	-0.0248758	0.75733
AMEX60DD001055	-0.0246754	0.897097	0.0633879	0.470758
AMEX60DD001057	-1.9886	0.201441	-0.553695	0.400434
AMEX60DD001058	-1.61171	0.263929	0.838622	0.353711
AMEX60DD001059	-0.159445	0.923749	-0.290661	0.671028
AMEX60DD001061	-1.12124	0.500907	-0.38377	0.727624
AMEX60DD001062	-0.234183	0.54387	-0.0122344	0.952309
AMEX60DD001063	-0.546127	0.390637	-0.16577	0.590793
AMEX60DD001064	-1.12124	0.500906	1.51147	0.29479
AMEX60DD001065	0.241328	0.128974	0.0569321	0.579917
AMEX60DD001071	0.354336	0.674884	0.483779	0.266551
AMEX60DD001077	0.0203601	0.879914	-0.0125339	0.881903
AMEX60DD001080	-0.0880209	0.802841	0.055114	0.833586
AMEX60DD001081	-2.34867	0.0803381	0.768232	0.465908
AMEX60DD001082	0.73621	0.636606	-2.37898	0.551666
AMEX60DD001086	0.00908786	0.963986	0.0830624	0.645637
AMEX60DD001093	-0.0444355	0.748732	-0.174519	0.234007
AMEX60DD001095	0.436385	0.0332227	0.0205235	0.900149
AMEX60DD001100	0.00694562	0.912869	-0.0992234	0.0694818
AMEX60DD001101	0.802345	0.630064	-0.705698	0.502985
AMEX60DD001105	-0.040892	0.733884	-0.0623069	0.387379
AMEX60DD001106	-1.9886	0.201441	1.51147	0.29479
AMEX60DD001107	-0.159447	0.923748	0.960185	0.806737
AMEX60DD001108	1.0913	0.273001	-0.29539	0.656016
AMEX60DD001109	-0.13109	0.91139	-0.646805	0.266064
AMEX60DD001110	2.05813	0.125421	0.409779	0.499499
AMEX60DD001111	1.58207	0.143688	0.61623	0.105045
AMEX60DD001112	2.05813	0.125421	2.03127	0.0749199
AMEX60DD001115	0.726891	0.0221355	-0.0704532	0.738433
AMEX60DD001116	1.32117	0.359789	0.0312672	0.96333
AMEX60DD001117	0.00661264	0.932133	0.0200535	0.734439
AMEX60DD001120	-0.159445	0.923749	-0.0942637	0.875617
AMEX60DD001125	-2.34867	0.0803378	0.165304	0.854661
AMEX60DD001126	-0.0995581	0.20732	-0.0692922	0.107882
AMEX60DD001127	-0.868054	0.409997	1.03127	0.191867
AMEX60DD001130	-0.315514	0.454382	0.607459	0.0156983
AMEX60DD001133	1.698	0.275862	-0.968732	0.342311
AMEX60DD001134	-0.716051	0.586647	1.14674	0.107287
AMEX60DD001135	0.283948	0.796642	-0.161378	0.828885
AMEX60DD001136	-1.61171	0.263929	-0.45416	0.447068
AMEX60DD001137	-0.159447	0.923748	0.0333093	0.984047
AMEX60DD001138	-0.131154	0.927478	-0.968732	0.342311
AMEX60DD001139	-1.13109	0.267534	-0.191125	0.68002
AMEX60DD001140	-0.0369676	0.862103	-0.110205	0.477317
AMEX60DD001147	2.698	0.0507871	0.879264	0.122283
AMEX60DD001148	0.289616	0.0869745	-0.185156	0.170721
AMEX60DD001150	-0.0866957	0.674832	0.278678	0.0146829
AMEX60DD001153	-0.0474533	0.800791	0.00630649	0.916305
AMEX60DD001154	-0.131154	0.927478	0.0312672	0.982709
AMEX60DD001155	-1.6117	0.26393	1.8145	0.106284
AMEX60DD001156	-0.131089	0.91139	0.397497	0.602644
AMEX60DD001157	0.868843	0.486108	0.61623	0.417689
AMEX60DD001164	-1.43014	0.741881	-0.776087	0.390749
AMEX60DD001167	0.158417	0.17376	-0.0670544	0.460749
AMEX60DD001170	-0.0501697	0.85732	0.00952148	0.961878
AMEX60DD001172	0.0913032	0.872194	-0.389296	0.612888
AMEX60DD001177	-0.0117908	0.964178	-0.0161086	0.94704
AMEX60DD001178	-1.12124	0.500907	0.768232	0.465908
AMEX60DD001182	-0.13109	0.897752	0.0183067	0.984515
AMEX60DD001190	-2.02757	0.638062	0.0312672	0.946741
AMEX60DD001193	-0.066437	0.25405	0.0263571	0.608408
AMEX60DD001194	0.802346	0.630064	1.25366	0.207937
AMEX60DD001196	0.0707682	0.298722	-0.00998033	0.807426
AMEX60DD001197	0.0301159	0.716494	-0.053137	0.168047
AMEX60DD001198	-2.5735	0.0744533	0.61623	0.639852
AMEX60DD001206	-2.39192	0.581728	-0.38377	0.727624
AMEX60DD001210	-1.98861	0.201441	1.03127	0.409143
AMEX60DD001219	-0.868054	0.409998	0.561782	0.204099
AMEX60DD001220	0.736212	0.636605	-1.55369	0.0621374
AMEX60DD001221	2.28296	0.11355	0.75913	0.573024
AMEX60DD001225	0.802346	0.630064	0.393837	0.588031
AMEX60DD001226	-2.39191	0.58173	0.924352	0.171724
AMEX60DD001227	0.802343	0.630065	-0.915536	0.665368
AMEX60DD001239	0.605876	0.565253	-1.55369	0.0370253
AMEX60DD001242	0.802345	0.630064	0.0312672	0.978824
AMEX60DD001245	0.0837266	0.231594	0.104946	0.150186
AMEX60DD001250	-1.12124	0.500906	-0.928486	0.577285
AMEX60DD001253	0.605874	0.565254	-0.0942636	0.875617
AMEX60DD001254	1.698	0.275862	1.03127	0.31206
AMEX60DD001257	2.32117	0.0779876	-0.553695	0.552132
AMEX60DD001259	-1.43013	0.741883	0.838622	0.353711
AMEX60DD001261	0.736208	0.636607	0.294302	0.736203
AMEX60DD001262	0.148484	0.336565	0.0568023	0.553936
AMEX60DD001265	-1.13109	0.365307	-0.331303	0.648619
AMEX60DD001266	1.698	0.275861	-0.816729	0.310128
AMEX60DD001270	0.038836	0.955821	-0.0682684	0.857088
AMEX60DD001271	-0.323735	0.664598	-0.132231	0.739061
AMEX60DD001272	0.19084	0.843678	0.446305	0.566771
AMEX60DD001277	-1.98861	0.201441	0.0312672	0.982709
AMEX60DD001280	0.357777	0.760756	0.0370354	0.935497
AMEX60DD001283	0.0921083	0.40577	0.0148167	0.829723
AMEX60DD001284	-0.0833367	0.400932	-0.10424	0.271956
AMEX60DD001289	-1.12124	0.500906	-3.14565	0.0191741
AMEX60DD001290	-0.159445	0.923749	0.683578	0.742509
AMEX60DD001291	1.698	0.275861	1.3532	0.262253
AMEX60DD001293	-0.131157	0.927477	1.14674	0.107287
AMEX60DD001294	0.0366745	0.90618	-0.0912994	0.515072
AMEX60DD001296	-0.0936149	0.775893	-0.00189964	0.993071
AMEX60DD001298	-0.546126	0.620153	-0.0467353	0.921545
AMEX60DD001299	0.0324091	0.934933	-0.0021886	0.994317
AMEX60DD001300	-1.12124	0.500906	0.611259	0.807641
AMEX60DD001302	0.149018	0.774723	-0.38377	0.227623
AMEX60DD001312	0	1	-1.82373	0.241864
AMEX60DD001313	0	1	-2.44689	0.0631777
AMEX60DD001318	0	1	2.47327	0.0864665
AMEX60DD001320	0.140653	0.752995	0.20673	0.58978
AMEX60DD001322	0.0286748	0.929157	-0.380467	0.213353
AMEX60DD001323	0.107419	0.78454	-0.319346	0.337631
AMEX60DD001327	0.231482	0.750193	0.105268	0.819832
AMEX60DD001332	-1.02681	0.509503	0.709339	0.388436
AMEX60DD001333	0.736208	0.636607	-0.45416	0.590838
AMEX60DD001337	-0.174482	0.163133	-0.0577378	0.460431
AMEX60DD001339	-0.90021	0.323726	-0.201394	0.516391
AMEX60DD001342	0.736209	0.636606	0.623383	0.576342
AMEX60DD001344	-0.159447	0.923748	-0.705698	0.502985
AMEX60DD001348	0.0161035	0.835206	-0.0592816	0.20219
AMEX60DD001356	1.19077	0.323052	-0.553695	0.674176
AMEX60DD001368	0.0002819	0.99646	-0.0487003	0.439049
AMEX60DD001371	0.243306	0.0815095	0.0219894	0.78809
AMEX60DD001372	0.802345	0.630064	0.0312672	0.967658
AMEX60DD001373	0.00556719	0.938036	9.46e-05	0.998293
AMEX60DD001375	0.868909	0.325349	0.505198	0.257291
AMEX60DD001391	-0.0747944	0.373523	-0.00231537	0.962953
AMEX60DD001393	0.0790427	0.496661	-0.100479	0.297452
AMEX60DD001395	-0.716048	0.586648	-1.29066	0.284947
AMEX60DD001396	-0.159448	0.923747	0.446304	0.685448
AMEX60DD001398	0.0615558	0.934296	-1.0562	0.0877229
AMEX60DD001411	0.802346	0.630064	0.995105	0.550277
AMEX60DD001423	0.0532519	0.477265	-0.015901	0.772497
AMEX60DD001425	-0.131089	0.847153	0.490699	0.30058
AMEX60DD001426	-1.02681	0.509503	0.616229	0.639852
AMEX60DD001427	-1.61171	0.263929	0.294302	0.633769
AMEX60DD001428	-0.145911	0.298567	0.0224884	0.807335
AMEX60DD001429	-0.131152	0.92748	-2.82372	0.0409249
AMEX60DD001430	-0.25662	0.670015	0.153258	0.654762
AMEX60DD001431	0.802343	0.630065	-0.290661	0.763922
AMEX60DD001432	0.220383	0.218002	-0.00684887	0.956558
AMEX60DD001433	0.802345	0.630064	-0.120736	0.855473
AMEX60DD001438	1.4538	0.216313	-0.51622	0.32017
AMEX60DD001439	-0.159447	0.923748	0.446304	0.685448
AMEX60DD001440	0.137176	0.178173	-0.149058	0.0157109
AMEX60DD001445	-0.805337	0.309268	0.179659	0.322625
AMEX60DD001447	-0.159444	0.923749	0.616229	0.639852
AMEX60DD001448	-2.80844	0.515487	-2.66929	0.0397446
AMEX60DD001456	-2.61171	0.0473581	-0.281573	0.79678
AMEX60DD001457	0.802342	0.630065	0.353195	0.715148
AMEX60DD001462	0.0849014	0.437819	-0.0750897	0.149798
AMEX60DD001463	-1.6117	0.26393	0.621288	0.641738
AMEX60DD001464	-1.02681	0.509503	-0.290661	0.763922
AMEX60DD001465	2.28296	0.11355	-1.82373	0.241864
AMEX60DD001469	-3.61767	0.267682	0.838622	0.353711
AMEX60DD001470	1.698	0.275862	-0.485357	0.788883
AMEX60DD001471	-0.159444	0.923749	-1.86193	0.177665
AMEX60DD001478	-0.0324055	0.863674	-0.225891	0.459444
AMEX60DD001479	0.311693	0.0960526	-0.163087	0.299511
AMEX60DD001485	-0.131091	0.911389	-0.798808	0.183894
AMEX60DD001488	0.802346	0.630064	-0.553695	0.674176
AMEX60DD001490	0	1	1.51147	0.29479
AMEX60DD001491	2.28296	0.11355	-0.819825	0.613321
AMEX60DD001497	0.0597948	0.664831	-0.170796	0.174244
AMEX60DD001504	1.32117	0.359788	-0.311838	0.870171
AMEX60DD001505	-0.0685884	0.218757	0.0696902	0.389742
AMEX60DD001511	1.32117	0.359788	0.0524678	0.964176
AMEX60DD001515	0.630123	0.00780032	0.0572624	0.675833
AMEX60DD001518	1.698	0.275861	3.21023	0.0168387
AMEX60DD001519	0.0865017	0.773126	-0.199265	0.149202
AMEX60DD001525	-0.131089	0.897752	-0.483306	0.49664
AMEX60DD001526	0.453804	0.730041	-1.55369	0.013603
AMEX60DD001528	0.0360255	0.878597	-0.1793	0.281472
AMEX60DD001532	0.190837	0.843679	0.113729	0.815691
AMEX60DD001536	0	1	-0.120736	0.855473
AMEX60DD001537	1.698	0.275862	-0.258239	0.690449
AMEX60DD001538	0.73621	0.636606	1.25366	0.207937
AMEX60DD001540	-0.159447	0.923748	0	1
AMEX60DD001541	0.0108288	0.973767	-0.0810135	0.707758
AMEX60DD001543	-0.159444	0.923749	0	1
AMEX60DD001544	-0.15945	0.923747	0.616229	0.639852
AMEX60DD001548	-0.159449	0.923747	0.516694	0.54077
AMEX60DD001549	0.0365101	0.665412	0.0429272	0.398771
AMEX60DD001550	-0.00844831	0.895889	-0.0777941	0.0440671
AMEX60DD001551	0.071644	0.539714	-0.0622814	0.374152
AMEX60DD001553	-0.15945	0.923746	0.0312672	0.95112
AMEX60DD001556	-0.317503	0.0341821	-0.026066	0.785729
AMEX60DD001558	-0.159447	0.923748	-0.776087	0.390749
AMEX60DD001562	-1.9886	0.201441	1.8883	0.225596
AMEX60DD001567	1.698	0.275862	0.353195	0.715148
AMEX60DD001574	0.163917	0.193244	0.177892	0.0232155
AMEX60DD001576	2.698	0.050787	0.0312672	0.957662
AMEX60DD001577	0.19084	0.843677	-0.138658	0.843207
AMEX60DD001578	0	1	0.0333093	0.984047
AMEX60DD001579	0.0825057	0.684528	-0.0118015	0.924568
AMEX60DD001584	-1.6117	0.26393	0.138182	0.803612
AMEX60DD001585	0	1	-0.899881	0.494275
AMEX60DD001587	0.293408	0.179554	-0.150601	0.379319
AMEX60DD001588	-1.02681	0.509502	0.0522208	0.97599
AMEX60DD001589	0.10707	0.733138	0.15032	0.468447
AMEX60DD001590	1.698	0.275862	0.353195	0.715148
AMEX60DD001592	0.0453367	0.799608	0.055447	0.607126
AMEX60DD001593	0.190838	0.577024	-0.122356	0.561504
AMEX60DD001594	-0.159444	0.923749	1.03127	0.31206
AMEX60DD001598	-1.12124	0.500906	-0.553695	0.674176
AMEX60DD001601	-0.105555	0.697379	0.191048	0.151788
AMEX60DD001602	-1.12124	0.500906	-0.709515	0.639415
AMEX60DD001604	-0.0603869	0.657525	-0.15636	0.0660948
AMEX60DD001605	-0.388325	0.700967	0.429817	0.292002
AMEX60DD001606	-1.61171	0.263929	0.446305	0.365096
AMEX60DD001607	-1.12124	0.500907	0.709339	0.388436
AMEX60DD001608	0.00345916	0.947851	0.0578096	0.425797
AMEX60DD001610	-1.12124	0.500907	-0.861931	0.580176
AMEX60DD001614	0.354337	0.34828	-0.015527	0.94166
AMEX60DD001621	-0.131153	0.927479	1.40978	0.0633203
AMEX60DD001622	0.498961	0.0806455	-0.1986	0.288821
AMEX60DD001625	0.134124	0.68701	-0.105589	0.611912
AMEX60DD001626	0.000997578	0.994953	-0.057386	0.586861
AMEX60DD001630	-0.131157	0.927476	-0.705698	0.343516
AMEX60DD001631	-0.130503	0.597137	0.012302	0.889344
AMEX60DD001635	-1.71605	0.14517	0.0312672	0.955935
AMEX60DD001636	0.188122	0.0141316	-0.0667014	0.415831
AMEX60DD001637	-0.178395	0.629223	0.18489	0.380296
AMEX60DD001638	1.698	0.275862	0.446304	0.685448
AMEX60DD001639	0.0533057	0.228738	0.0212533	0.611518
AMEX60DD001642	0.158417	0.806995	0.194766	0.623692
AMEX60DD001643	-1.13109	0.0903302	0.0697414	0.834211
AMEX60DD001644	0.123907	0.437818	-0.127904	0.415999
AMEX60DD001646	0.0701567	0.365315	0.00368881	0.950885
AMEX60DD001647	0	1	0.156798	0.794579
AMEX60DD001651	0.802346	0.630064	-0.86193	0.580176
AMEX60DD001656	-0.742524	0.0163612	-0.0749382	0.758644
AMEX60DD001658	-1.02681	0.509504	0.0312672	0.978824
AMEX60DD001666	0.431836	0.188684	-0.08421	0.585366
AMEX60DD001668	-0.160702	0.0990921	-0.0592743	0.46647
AMEX60DD001669	0.247422	0.361922	-0.0129004	0.929472
AMEX60DD001671	0.244419	0.438686	-0.140685	0.528136
AMEX60DD001673	0.126068	0.679712	0.0641818	0.718317
AMEX60DD001682	-0.518112	0.329693	0.0818933	0.830355
AMEX60DD001686	-0.546126	0.620153	0.808875	0.238446
AMEX60DD001688	0.0490309	0.734143	-0.0424968	0.712589
AMEX60DD001695	-0.0651729	0.721814	-0.125326	0.320288
AMEX60DD001696	-0.200322	0.28648	-0.123208	0.296082
AMEX60DD001699	-1.41377	0.744793	1.03127	0.409143
AMEX60DD001702	0.802346	0.630064	0.0312672	0.982709
AMEX60DD001705	-0.131089	0.874945	-0.271015	0.674412
AMEX60DD001706	-1.02682	0.509501	-0.45416	0.447068
AMEX60DD001707	-1.13109	0.116876	-0.44614	0.181616
AMEX60DD001709	-0.716049	0.586648	-0.553694	0.674176
AMEX60DD001712	0.395983	0.396399	0.18327	0.434214
AMEX60DD001713	-0.89773	0.224935	0.0547262	0.8334
AMEX60DD001714	-1.02681	0.509503	0.25366	0.654922
AMEX60DD001717	0.736209	0.636606	-0.120736	0.855473
AMEX60DD001723	-0.13109	0.885761	0.393837	0.278638
AMEX60DD001729	-0.110028	0.138798	0.0487897	0.453441
AMEX60DD001732	-0.0574228	0.467784	-0.0628664	0.255294
AMEX60DD001741	-0.159445	0.923749	0.926508	0.552132
AMEX60DD001742	-1.71605	0.14517	-0.303152	0.451708
AMEX60DD001750	-0.126001	0.298422	-0.000513583	0.99561
AMEX60DD001751	-0.868053	0.409998	-1.38377	0.0451116
AMEX60DD001753	-0.207711	0.444293	0.0528541	0.713765
AMEX60DD001754	0.802346	0.630064	0.295442	0.833168
AMEX60DD001755	-0.71605	0.586647	0.16812	0.808273
AMEX60DD001768	-0.938444	0.29936	0.41829	0.43132
AMEX60DD001770	1.698	0.275862	-1.19112	0.231523
AMEX60DD001772	0.0615559	0.934296	0.9788	0.0393958
AMEX60DD001775	-0.0593884	0.71196	0.128074	0.330114
AMEX60DD001776	-0.131087	0.911392	-0.45416	0.590838
AMEX60DD001777	0.736211	0.636605	-0.776087	0.390749
AMEX60DD001778	2.28296	0.11355	-3.18386	0.0117208
AMEX60DD001779	0.0472473	0.58207	-0.0545488	0.485466
AMEX60DD001780	0.802344	0.630065	-0.191125	0.811788
AMEX60DD001781	0.802346	0.630064	-1.96873	0.0843248
AMEX60DD001782	0.238144	0.543775	-0.093954	0.815333
AMEX60DD001783	0	1	0.0312672	0.970056
AMEX60DD001784	0.802347	0.630063	0.926507	0.552132
AMEX60DD001786	-0.868053	0.409998	0.168771	0.788901
AMEX60DD001787	0.0630176	0.478662	-0.0302001	0.668074
AMEX60DD001790	-0.323735	0.539767	0.0697414	0.834211
AMEX60DD001791	1.6762	0.146562	-0.432305	0.609567
AMEX60DD001792	0.736211	0.636605	-0.553695	0.674176
AMEX60DD001793	-1.61171	0.263929	-1.77609	0.124676
AMEX60DD001794	-0.198834	0.155052	-0.0815441	0.26454
AMEX60DD001795	-1.13109	0.365307	-1.48133	0.0931791
AMEX60DD001796	0.190838	0.843679	0.446305	0.482959
AMEX60DD001797	-1.13109	0.365307	0.237718	0.663681
AMEX60DD001805	-0.394124	0.434557	0.400501	0.307245
AMEX60DD001815	-0.131089	0.847153	-0.241751	0.543691
AMEX60DD001818	0	1	-0.553695	0.400434
AMEX60DD001819	-0.979085	0.223713	-0.776088	0.137134
AMEX60DD001825	0.0227374	0.764011	-0.0939965	0.141596
AMEX60DD001829	0.218853	0.417399	0.176698	0.307843
AMEX60DD001831	-0.0491454	0.527059	-0.0446419	0.241249
AMEX60DD001833	-0.546125	0.620153	-0.968733	0.0829643
AMEX60DD001834	-0.131156	0.927477	0.497563	0.747
AMEX60DD001836	2.698	0.0507869	-0.347244	0.567168
AMEX60DD001840	0	1	-0.492387	0.575271
AMEX60DD001842	0.736208	0.636607	-0.454159	0.590838
AMEX60DD001844	-0.159447	0.923748	0.471581	0.738873
AMEX60DD001845	-2.5735	0.0744532	-0.968733	0.220222
AMEX60DD001851	0.0152996	0.89252	-0.0153829	0.824435
AMEX60DD001852	0.0947916	0.521002	0.0643755	0.452692
AMEX60DD001868	0.234343	0.204797	0.0312672	0.631407
AMEX60DD001869	0.0023636	0.985756	-0.0253642	0.803369
AMEX60DD001872	-0.131156	0.927477	0.207529	0.82958
AMEX60DD001873	0.0698545	0.450082	-0.0180807	0.81036
AMEX60DD001878	-1.9886	0.201441	-0.231767	0.790776
AMEX60DD001879	0.73621	0.636606	1.03127	0.409143
AMEX60DD001881	0.868843	0.486108	-0.968732	0.438132
AMEX60DD001882	0.736212	0.636605	1.92651	0.163096
AMEX60DD001883	1.73621	0.208766	0.768233	0.465908
AMEX60DD001884	0.736212	0.636605	-0.553695	0.674176
AMEX60DD001886	0	1	1.51147	0.29479
AMEX60DD001887	-0.270253	0.228067	-0.0214131	0.869141
AMEX60DD001888	0.210734	0.301975	-0.170751	0.118056
AMEX60DD001890	0.802343	0.630065	0.446304	0.685448
AMEX60DD001891	1.32117	0.359787	-0.483306	0.49664
AMEX60DD001893	0.0388367	0.95582	-0.409305	0.420541
AMEX60DD001894	-0.344797	0.0560758	-0.124214	0.287191
AMEX60DD001907	0.802346	0.630064	0.0312672	0.978824
AMEX60DD001908	0.605876	0.565253	-0.968732	0.272854
AMEX60DD001911	0.190838	0.843679	-1.235	0.275998
AMEX60DD001917	0.802342	0.630065	0.474979	0.6243
AMEX60DD001923	-1.54612	0.113422	0.0312672	0.965426
AMEX60DD001929	0.868843	0.486108	0.864064	0.226886
AMEX60DD001930	0.933041	0.0776989	-0.265714	0.418501
AMEX60DD001931	-0.311662	0.388456	0.0640572	0.768373
AMEX60DD001938	0.30187	0.478176	0.272275	0.356866
AMEX60DD001954	0.153364	0.486605	-0.126274	0.359342
AMEX60DD001961	-1.12124	0.500906	0.926508	0.552132
AMEX60DD001964	-0.00569467	0.990732	0.223912	0.368307
AMEX60DD001965	0.396157	0.0818891	-0.181394	0.22972
AMEX60DD001966	-1.12124	0.500906	-0.776087	0.390749
AMEX60DD001967	0.112836	0.722588	-0.0708002	0.807706
AMEX60DD001973	-1.61171	0.263929	-0.968732	0.438132
AMEX60DD001974	0.112259	0.277463	-0.0383653	0.537969
AMEX60DD001975	0.178664	0.155219	-0.0233599	0.777831
AMEX60DD001976	-0.71605	0.586647	0.168771	0.788901
AMEX60DD001977	-0.25662	0.670015	-0.0209212	0.972874
AMEX60DD001981	0.23148	0.581321	-0.334017	0.182099
AMEX60DD001982	0	1	-0.38377	0.727624
AMEX60DD001983	0.802345	0.630064	0.838622	0.353711
AMEX60DD001984	-0.493659	0.497145	-0.347244	0.252435
AMEX60DD001985	-0.159444	0.923749	0.294301	0.736203
AMEX60DD001986	0.400911	0.689881	-0.160127	0.759724
AMEX60DD001987	0	1	0.768232	0.465908
AMEX60DD001988	0.605875	0.565253	-1.09426	0.0372398
AMEX60DD001989	-0.159452	0.923746	-1.24968	0.139271
AMEX60DD001990	-1.12124	0.500907	1.51147	0.29479
AMEX60DD001993	0.00788661	0.970219	0.311378	0.131901
AMEX60DD001997	-0.278191	0.650957	-0.381975	0.350098
AMEX60DD002003	-1.93844	0.0937777	0.279195	0.568446
AMEX60DD002011	-0.0279964	0.837386	0.0579173	0.488503
AMEX60DD002017	0.802347	0.630063	-1.44689	0.315904
AMEX60DD002018	-2.02674	0.142294	0.0312672	0.978824
AMEX60DD002019	0.0355026	0.588285	0.0100611	0.87483
AMEX60DD002029	0.0906037	0.17044	-0.0284155	0.482959
AMEX60DD002030	-0.938443	0.29936	0.223912	0.671494
AMEX60DD002039	2.05814	0.125421	0.838622	0.353711
AMEX60DD002043	0.389742	0.159571	-0.0714923	0.663366
AMEX60DD002044	0.376976	0.650838	-0.509301	0.202435
AMEX60DD002054	0.0913028	0.909434	0.138182	0.803612
AMEX60DD002057	0.605875	0.565254	1.03127	0.0799555
AMEX60DD002059	0.255933	0.630167	0.234801	0.493987
AMEX60DD002060	-0.546124	0.620154	0.223912	0.764266
AMEX60DD002062	-1.9886	0.201442	0.61623	0.639852
AMEX60DD002063	0.73621	0.636606	0.0333093	0.984047
AMEX60DD002066	-0.493659	0.497144	0.362313	0.511661
AMEX60DD002067	-0.159445	0.923749	-1.29066	0.284946
AMEX60DD002072	-0.546126	0.620153	0.0312672	0.967658
AMEX60DD002073	-1.45301	0.228674	-0.331303	0.648619
AMEX60DD002075	0.802307	0.810624	0.616229	0.508151
AMEX60DD002076	0.396842	0.165732	0.081009	0.732065
AMEX60DD002077	-0.868054	0.409998	0.41829	0.43132
AMEX60DD002078	0.802345	0.630064	0.926507	0.552132
AMEX60DD002079	0.0064141	0.991881	0.311375	0.397703
AMEX60DD002080	0.185094	0.240376	0.0610146	0.555842
AMEX60DD002083	0.736206	0.636608	-0.106236	0.866164
AMEX60DD002084	0.777648	0.22931	-0.396589	0.352333
AMEX60DD002085	0.344059	0.509142	-0.241751	0.292904
AMEX60DD002086	0.453873	0.329682	0.140202	0.617138
AMEX60DD002087	-0.493659	0.497144	-0.521274	0.280559
AMEX60DD002088	-1.45302	0.0370684	0.478726	0.403196
AMEX60DD002089	-1.30101	0.133439	-2.07832	0.075598
AMEX60DD002090	0.802346	0.630064	0.353195	0.715148
AMEX60DD002091	-0.39796	0.452878	-0.335942	0.146582
AMEX60DD002092	-0.0322365	0.74104	0.0162054	0.771162
AMEX60DD002098	-1.93844	0.0937778	-0.583893	0.474719
AMEX60DD002100	-0.398904	0.395715	0.195654	0.452765
AMEX60DD002101	0.802346	0.630064	1.35319	0.262253
AMEX60DD002102	-0.159444	0.923749	0.0312672	0.975549
AMEX60DD002103	0	1	-1.44689	0.315904
AMEX60DD002106	2.33891	0.210838	-0.075648	0.891713
AMEX60DD002107	0.216834	0.709127	0.365686	0.363978
AMEX60DD002108	0.198942	0.392902	0.0861093	0.321269
AMEX60DD002111	-1.02681	0.509502	-0.231767	0.790776
AMEX60DD002122	0.0543942	0.819546	0.0279082	0.776808
AMEX60DD002123	0.260286	0.0202177	0.0607341	0.288225
AMEX60DD002126	1.698	0.275862	-0.861931	0.580176
AMEX60DD002129	-1.12124	0.500906	-0.290661	0.763922
AMEX60DD002130	0.214046	0.499638	-0.311929	0.14555
AMEX60DD002133	0.579404	0.293995	0.353195	0.248469
AMEX60DD002134	2.28296	0.113551	0.223912	0.671494
AMEX60DD002135	-1.45301	0.228675	0.731707	0.259034
AMEX60DD002136	-0.546124	0.620154	-0.777045	0.449749
AMEX60DD002137	0.0829362	0.675469	-0.185433	0.159014
AMEX60DD002139	0	1	-0.191125	0.736303
AMEX60DD002148	0.736211	0.636605	-0.161378	0.828885
AMEX60DD002151	0.160676	0.529183	0.0424078	0.737999
AMEX60DD002152	-0.0298064	0.912229	0.112187	0.486217
AMEX60DD002154	0.736212	0.636605	-0.968731	0.438132
AMEX60DD002155	-2.5735	0.0744533	0.0312672	0.978824
AMEX60DD002156	-1.02681	0.509503	-0.816729	0.310128
AMEX60DD002160	0.0447142	0.607777	-0.177243	0.713935
AMEX60DD002163	0.605876	0.158956	0.240248	0.489958
AMEX60DD002165	0.736208	0.636606	-0.553695	0.466494
AMEX60DD002171	1.03883	0.230815	0.25366	0.527346
AMEX60DD002180	0.802342	0.630065	-1.49297	0.523628
AMEX60DD002188	0.453803	0.730042	0.0312672	0.96333
AMEX60DD002192	-0.131155	0.927478	-0.861818	0.202583
AMEX60DD002196	0.23148	0.750194	-0.0118015	0.973296
AMEX60DD002197	-0.71605	0.586647	0.54584	0.44264
AMEX60DD002200	-0.0420758	0.438845	-0.087453	0.0898616
AMEX60DD002203	-0.159445	0.923749	-3.14565	0.0191741
AMEX60DD002205	0.802345	0.630064	-2.82373	0.0409248
AMEX60DD002209	-0.07477	0.64644	-0.111667	0.347301
AMEX60DD002213	0.453808	0.730039	-1.44689	0.315904
AMEX60DD002214	-1.45301	0.228675	0.0312672	0.965426
AMEX60DD002215	0.453809	0.730039	-1.29066	0.284947
AMEX60DD002219	-1.12124	0.500906	2.85618	0.411996
AMEX60DD002220	1.73621	0.208765	-2.18386	0.103947
AMEX60DD002223	0.802347	0.630063	0.446305	0.566771
AMEX60DD002228	0.868909	0.394349	-0.43964	0.548764
AMEX60DD002237	-0.159443	0.92375	0.0312672	0.975549
AMEX60DD002244	-1.12124	0.500907	1.03127	0.409143
AMEX60DD002249	1.698	0.275862	1.61623	0.0928741
AMEX60DD002250	-0.159443	0.92375	0.838622	0.353711
AMEX60DD002251	0.868841	0.486108	-0.0561956	0.910959
AMEX60DD002253	-0.256621	0.460469	-0.061468	0.634677
AMEX60DD002254	0.224494	0.139072	-0.0373037	0.849238
AMEX60DD002255	0.349239	0.0186981	0.077471	0.48165
AMEX60DD002258	0	1	1.8883	0.225596
AMEX60DD002260	0	1	0.0333093	0.984047
AMEX60DD002262	0.802345	0.630064	0.0508583	0.971785
AMEX60DD002263	-1.02681	0.509503	1.03127	0.243091
AMEX60DD002264	2.28296	0.11355	-1.55369	0.0621374
AMEX60DD002265	0	1	0.926508	0.552132
AMEX60DD002266	-1.6117	0.26393	2.20119	0.0509682
AMEX60DD002268	0.736209	0.636606	-0.0301333	0.942936
AMEX60DD002270	0.244419	0.273435	0.0129664	0.922145
AMEX60DD002271	-0.353482	0.445587	0.0312672	0.912005
AMEX60DD002283	0	1	1.8883	0.225596
AMEX60DD002284	-0.159444	0.923749	0.995105	0.550277
AMEX60DD002291	0.605875	0.416074	-0.209741	0.615763
AMEX60DD002293	0	1	3.69566	0.00441195
AMEX60DD002296	-0.574696	0.130538	0.219712	0.302681
AMEX60DD002297	0.73621	0.636606	1.83862	0.111947
AMEX60DD002304	0	1	0.0333093	0.984047
AMEX60DD002305	1.698	0.275863	-0.178516	0.851268
AMEX60DD002306	-0.868054	0.409998	-0.454159	0.590838
AMEX60DD002308	0.272807	0.0462857	0.0733488	0.430961
AMEX60DD002312	0.354337	0.553047	-0.843202	0.0212667
AMEX60DD002315	-1.02417	0.0322329	0.212511	0.568344
AMEX60DD002317	1.698	0.275862	1.51147	0.294789
AMEX60DD002318	0.290239	0.0100457	0.0685734	0.316194
AMEX60DD002324	-1.12124	0.500906	-1.86193	0.177665
AMEX60DD002329	-0.131153	0.927479	1.76823	0.0626186
AMEX60DD002330	1.698	0.275862	-2.44771	0.139538
AMEX60DD002334	0.381861	0.0555305	1.63e-05	0.999894
AMEX60DD002336	-0.71605	0.586647	-0.669172	0.301971
AMEX60DD002338	-1.02681	0.509502	0.824424	0.30503
AMEX60DD002339	-0.106637	0.422036	0.0012725	0.986635
AMEX60DD002340	-0.394123	0.65188	-0.240028	0.661181
AMEX60DD002341	-0.131089	0.91139	0.0953976	0.824521
AMEX60DD002342	-0.131088	0.91139	-0.106236	0.866164
AMEX60DD002344	0.736208	0.636607	-0.231767	0.790776
AMEX60DD002345	1.698	0.275861	-0.553695	0.674176
AMEX60DD002346	1.73621	0.208766	-0.553694	0.674176
AMEX60DD002347	1.698	0.275862	0.768233	0.302457
AMEX60DD002349	0.73621	0.636606	1.04036	0.41609
AMEX60DD002350	-0.159446	0.923748	1.90574	0.0425539
AMEX60DD002351	-0.716052	0.441946	-0.553695	0.265994
AMEX60DD002352	-0.131155	0.927478	1.51147	0.29479
AMEX60DD002353	1.698	0.275861	1.03127	0.31206
AMEX60DD002354	0.26746	0.353767	-0.147271	0.33646
AMEX60DD002355	-1.12124	0.500906	1.35319	0.262253
AMEX60DD002356	0.283947	0.796642	-0.503952	0.57345
AMEX60DD002360	0.176763	0.190912	-0.0954248	0.233728
AMEX60DD002361	-0.0172699	0.920427	-0.0893229	0.377532
AMEX60DD002368	-0.0530873	0.710605	0.151771	0.0747183
AMEX60DD002369	0.0484596	0.699303	0.0815664	0.265961
AMEX60DD002370	2.05813	0.125422	-0.120736	0.855473
AMEX60DD002374	-1.02681	0.509504	0.446304	0.685448
AMEX60DD002379	0.165892	0.613493	0.107618	0.608247
AMEX60DD002380	0.193088	0.596528	0.124582	0.54226
AMEX60DD002381	-1.12124	0.500907	-1.29066	0.284947
AMEX60DD002382	1.45387	0.0809028	-0.149997	0.782049
AMEX60DD002384	-1.12124	0.500906	1.61623	0.170044
AMEX60DD002387	-0.13109	0.518465	-0.194736	0.0668333
AMEX60DD002389	-1.6117	0.26393	-0.290661	0.763922
AMEX60DD002390	-1.12124	0.500905	-0.553695	0.674176
AMEX60DD002391	-0.716049	0.586647	1.61623	0.170044
AMEX60DD002392	0.366019	0.597569	0.490699	0.1432
AMEX60DD002394	1.7362	0.208767	0.294301	0.736203
AMEX60DD002396	0.802346	0.630064	-0.705698	0.502985
AMEX60DD002398	0.802347	0.630063	-3.14565	0.019174
AMEX60DD002405	-0.453017	0.639716	-0.0391221	0.930837
AMEX60DD002407	-0.159448	0.923747	-0.968732	0.438132
AMEX60DD002409	2.03877	0.0700988	0.0312672	0.954274
AMEX60DD002410	1.66849	0.702627	0.446305	0.685448
AMEX60DD002412	-0.131091	0.911389	-0.24572	0.697285
AMEX60DD002414	0.736212	0.636605	0.353195	0.605772
AMEX60DD002418	0.286468	0.0725563	0.0640233	0.489776
AMEX60DD002419	-0.259414	0.39417	-0.205772	0.2669
AMEX60DD002420	1.32117	0.359787	-0.553696	0.674176
AMEX60DD002421	0.736207	0.636607	0.353195	0.715148
AMEX60DD002423	-0.0632472	0.606328	-0.0208612	0.831285
AMEX60DD002424	-0.00384441	0.95366	-0.0732975	0.0674202
AMEX60DD002425	-0.546126	0.620153	-0.180779	0.860326
AMEX60DD002426	-0.159443	0.92375	1.03127	0.31206
AMEX60DD002427	-1.13109	0.365307	0.294302	0.736203
AMEX60DD002428	0.076202	0.473939	-0.00808861	0.904477
AMEX60DD002429	-3.79589	0.00345206	-0.38377	0.486068
AMEX60DD002430	-0.159445	0.923749	0.768232	0.465908
AMEX60DD002432	-0.0486276	0.862949	-0.0806257	0.6538
AMEX60DD002433	0.205945	0.420723	0.131794	0.360059
AMEX60DD002436	-1.61171	0.263929	1.03127	0.191867
AMEX60DD002439	0.605876	0.565253	-1.8432	0.0498191
AMEX60DD002440	0.0652802	0.303853	-0.0598274	0.301738
AMEX60DD002441	-0.215979	0.537246	-0.171041	0.403006
AMEX60DD002445	-3.31046	0.0137074	-0.347244	0.567168
AMEX60DD002450	1.73621	0.208766	-0.553695	0.552132
AMEX60DD002451	0.110799	0.369504	0.0617334	0.518587
AMEX60DD002452	0.0582875	0.661099	-0.00626843	0.939272
AMEX60DD002453	0.605874	0.565254	-0.735951	0.342042
AMEX60DD002455	2.28296	0.11355	1.40978	0.0633203
AMEX60DD002457	0.158672	0.713856	-0.32948	0.1082
AMEX60DD002461	1.7362	0.208767	-0.669172	0.301971
AMEX60DD002464	-1.12124	0.500907	-0.38377	0.727624
AMEX60DD002466	0.137399	0.640522	-0.15636	0.411145
AMEX60DD002467	0.0923575	0.082365	-0.0114419	0.724442
AMEX60DD002468	-1.13109	0.365308	-0.776087	0.390749
AMEX60DD002469	0.736212	0.636605	1.51147	0.294789
AMEX60DD002470	-1.12124	0.500906	0.768232	0.465908
AMEX60DD002472	2.28296	0.11355	0.130803	0.807247
AMEX60DD002476	-0.353482	0.659649	0.505921	0.598968
AMEX60DD002477	0	1	-1.82373	0.241864
AMEX60DD002478	-0.453018	0.639716	0.208145	0.61425
AMEX60DD002479	-1.12124	0.500906	0.616229	0.639852
AMEX60DD002481	-0.394123	0.65188	-0.537016	0.121357
AMEX60DD002482	-0.571662	0.260593	0.33383	0.346277
AMEX60DD002484	-1.12124	0.500907	2.73386	0.035192
AMEX60DD002485	-1.12124	0.500907	2.38706	0.550692
AMEX60DD002491	-1.9886	0.201441	0.446304	0.685448
AMEX60DD002492	1.3195	0.706947	0.0312672	0.970056
AMEX60DD002493	-0.159445	0.923749	0.61623	0.508151
AMEX60DD002494	-0.13109	0.838995	0.340595	0.2336
AMEX60DD002495	0.605874	0.565254	-0.0561956	0.910959
AMEX60DD002496	-0.616515	0.465503	0.393837	0.443636
AMEX60DD002498	-0.0259733	0.524802	0.00618135	0.842541
AMEX60DD002504	-1.12124	0.500907	-0.861931	0.580176
AMEX60DD002505	-1.12124	0.500907	-0.928486	0.577285
AMEX60DD002507	-0.394124	0.65188	0.888218	0.166886
AMEX60DD002510	0.802347	0.630063	-2.40869	0.0950029
AMEX60DD002515	2.28296	0.113551	0.446305	0.482959
AMEX60DD002520	2.05813	0.125421	0.838622	0.189667
AMEX60DD002526	0.283948	0.796642	-0.331303	0.648619
AMEX60DD002533	1.32117	0.359786	-0.38377	0.727624
AMEX60DD002539	2.28296	0.11355	1.03127	0.31206
AMEX60DD002542	0	1	0.0312672	0.982709
AMEX60DD002543	0.0964798	0.177178	-0.0549488	0.209207
AMEX60DD002544	-0.0136533	0.908571	0.0477554	0.511293
AMEX60DD002545	2.28296	0.113551	0.375296	0.705308
AMEX60DD002546	2.32117	0.0779874	0.223912	0.764266
AMEX60DD002550	-0.167963	0.606163	0.0428975	0.773792
AMEX60DD002553	0.283946	0.796643	-0.518027	0.543319
AMEX60DD002554	-0.0138835	0.883063	-0.0277228	0.634728
AMEX60DD002555	0.736214	0.636604	-1.29066	0.284947
AMEX60DD002556	0.0930335	0.605617	0.0896112	0.43107
AMEX60DD002557	-0.480809	0.888485	0.0312672	0.965426
AMEX60DD002559	-1.02681	0.509504	-0.209417	0.779443
AMEX60DD002560	1.73621	0.208766	-0.776087	0.390749
AMEX60DD002570	0	1	2.51147	0.0565242
AMEX60DD002576	-1.02681	0.509502	0.446304	0.685448
AMEX60DD002582	-1.12124	0.500907	-1.44689	0.315904
AMEX60DD002584	0.453806	0.73004	-0.968732	0.342311
AMEX60DD002587	-0.159443	0.92375	1.32148	0.564125
AMEX60DD002597	0.0739686	0.349427	0.0656663	0.171713
AMEX60DD002602	-0.131087	0.911391	0.446304	0.685448
AMEX60DD002604	0.292718	0.32543	-0.266413	0.179097
AMEX60DD002607	0.743379	0.309975	-0.0618422	0.866053
AMEX60DD002611	-1.9886	0.201441	0.524191	0.634543
AMEX60DD002614	0.131945	0.793627	-0.580167	0.0606803
AMEX60DD002617	-0.131089	0.91139	-0.258239	0.690449
AMEX60DD002623	0.173765	0.711999	-0.928486	0.577285
AMEX60DD002634	-0.097341	0.532731	0.194326	0.134258
AMEX60DD002645	-0.159447	0.923748	-0.861931	0.580176
AMEX60DD002650	-0.131154	0.927478	0.61623	0.417689
AMEX60DD002652	0.165892	0.0685859	0.0605154	0.261967
AMEX60DD002660	0.209948	0.673516	0.09998	0.750875
AMEX60DD002661	-0.473418	0.730747	0.0312672	0.965426
AMEX60DD002669	0.177033	0.554198	-0.421245	0.0104803
AMEX60DD002672	1.698	0.275862	-0.370127	0.732052
AMEX60DD002676	0.73621	0.636606	0.0312672	0.982709
AMEX60DD002678	-2.34867	0.080338	0.61623	0.295436
AMEX60DD002681	-1.12124	0.500905	0.0333093	0.984047
AMEX60DD002683	-1.12124	0.500907	1.83862	0.111947
AMEX60DD002684	0.0913026	0.670382	-0.203388	0.371843
AMEX60DD002685	-2.34867	0.0803382	-1.31915	0.396399
AMEX60DD002686	-1.6117	0.26393	1.03127	0.31206
AMEX60DD002687	-1.00556	0.0521121	-0.688625	0.0281325
AMEX60DD002688	1.73621	0.208766	0.18327	0.78218
AMEX60DD002697	-2.59052	0.0194969	1.62902	0.0853747
AMEX60DD002700	-2.34867	0.080338	1.61623	0.0928741
AMEX60DD002707	-0.165238	0.292447	-0.128573	0.407503
AMEX60DD002710	0.0187612	0.88834	-0.125509	0.0663471
AMEX60DD002715	-2.02674	0.142294	0.969786	0.260813
AMEX60DD002718	-0.115408	0.44292	0.0529158	0.575373
AMEX60DD002720	-0.159445	0.923749	-0.968732	0.438132
AMEX60DD002722	-0.353481	0.659649	0.561782	0.369187
AMEX60DD002723	1.73621	0.208765	-0.553695	0.674176
AMEX60DD002724	0.868909	0.325349	-0.38377	0.486068
AMEX60DD002727	-0.546125	0.620154	1.25366	0.207937
AMEX60DD002728	1.698	0.275861	0.926508	0.552132
AMEX60DD002729	-0.716049	0.586647	1.03127	0.409143
AMEX60DD002731	-0.546126	0.620153	-1.19112	0.231523
AMEX60DD002737	0.404524	0.442997	0.0312672	0.884407
AMEX60DD002738	0.194126	0.15274	0.00817491	0.927489
AMEX60DD002740	1.32117	0.359787	0.00615577	0.996351
AMEX60DD002743	0	1	2.58336	0.517178
AMEX60DD002747	0.36641	0.423026	-0.577542	0.0491107
AMEX60DD002751	-0.00555848	0.989585	0.146744	0.533693
AMEX60DD002759	3.01992	0.0245427	1.39384	0.0300852
AMEX60DD002761	-0.131157	0.927477	-0.075648	0.891713
AMEX60DD002762	0.177825	0.803757	0.115331	0.685119
AMEX60DD002786	-0.546126	0.620153	-0.553695	0.400434
AMEX60DD002788	0.802346	0.630064	-1.86193	0.177665
AMEX60DD002789	-1.12124	0.500906	-0.705698	0.502985
AMEX60DD002790	-1.02681	0.509504	-1.6259	0.386855
AMEX60DD002791	0.802346	0.630064	-0.968733	0.438132
AMEX60DD002792	-0.159445	0.923749	0.0312672	0.972664
AMEX60DD002800	-0.159445	0.923749	0.353195	0.715148
AMEX60DD002802	-0.0425127	0.814072	-0.0447534	0.698533
AMEX60DD002804	-1.02681	0.509502	0.293064	0.699065
AMEX60DD002810	-0.394123	0.65188	1.2329	0.0240636
AMEX60DD002812	0.190838	0.843679	-0.553695	0.674176
AMEX60DD002813	-0.0827269	0.859831	-0.269599	0.248814
AMEX60DD002816	-0.178395	0.629223	-0.301859	0.170425
AMEX60DD002818	1.32117	0.359786	0.0312672	0.975549
AMEX60DD002819	-1.61171	0.263929	0.238655	0.827275
AMEX60DD002823	1.698	0.275861	0.768233	0.302457
AMEX60DD002824	-0.131154	0.927478	-1.00219	0.580403
AMEX60DD002825	-0.131154	0.927478	-0.191125	0.736303
AMEX60DD002826	0.802343	0.630065	1.35319	0.262253
AMEX60DD002827	-1.12124	0.500906	-0.646804	0.431619
AMEX60DD002828	0.0814547	0.38503	0.0484083	0.399217
AMEX60DD002829	-1.13109	0.365308	0.269689	0.76371
AMEX60DD002830	-2.02674	0.142294	-0.454159	0.590838
AMEX60DD002831	0.802346	0.630064	-0.331303	0.648619
AMEX60DD002832	-2.02674	0.142294	0.838622	0.189667
AMEX60DD002840	-0.0211558	0.845323	-0.0615455	0.571653
AMEX60DD002842	0.0952751	0.640475	0.293616	0.00486661
AMEX60DD002846	2.05813	0.125421	-0.596764	0.285078
AMEX60DD002847	0.108812	0.0640133	0.00547722	0.860151
AMEX60DD002856	0.802345	0.630064	-0.38377	0.727624
AMEX60DD002858	-0.546125	0.620154	-1.80585	0.390908
AMEX60DD002861	0.404963	0.334178	-0.228119	0.34304
AMEX60DD002862	-1.03798	0.100302	0.320774	0.391547
AMEX60DD002863	-0.131089	0.897753	0.54584	0.44264
AMEX60DD002875	0.0913031	0.909433	-0.798808	0.183894
AMEX60DD002882	-0.0392162	0.709137	0.0292665	0.778064
AMEX60DD002886	-1.12124	0.500906	-0.331303	0.648619
AMEX60DD002888	-0.159449	0.923747	-0.45416	0.590838
AMEX60DD002896	-0.0631897	0.731101	-0.134982	0.119373
AMEX60DD002897	-1.12124	0.500907	-0.38377	0.622328
AMEX60DD002898	-0.131153	0.927479	-1.38377	0.156551
AMEX60DD002900	-0.131155	0.927478	0.0312672	0.959463
AMEX60DD002901	0.017966	0.912819	0.0784624	0.426328
AMEX60DD002902	0.403961	0.354767	-0.281418	0.309047
AMEX60DD002904	0	1	0.0333093	0.984047
AMEX60DD002906	0.736211	0.636605	-0.45416	0.590838
AMEX60DD002909	0.868843	0.486107	0.330827	0.53913
AMEX60DD002910	0.868844	0.486107	2.03127	0.0117806
AMEX60DD002911	0.0688116	0.449144	-0.0644823	0.229535
AMEX60DD002912	0.36641	0.423026	0.0910617	0.793988
AMEX60DD002913	-1.4112	0.0293973	0.051387	0.91919
AMEX60DD002914	-0.00308218	0.987869	0.0125307	0.914168
AMEX60DD002916	-0.0559325	0.51072	-0.0103928	0.907117
AMEX60DD002927	0.316369	0.580656	0.186545	0.533563
AMEX60DD002929	-1.12124	0.500907	0.879264	0.274541
AMEX60DD002930	0.802345	0.630064	1.33041	0.53001
AMEX60DD002931	-0.159458	0.951845	0.632775	0.419151
AMEX60DD002934	0	1	-1.82373	0.241864
AMEX60DD002936	0.453805	0.730041	-0.574056	0.708183
AMEX60DD002942	0.802346	0.630064	-0.861931	0.580176
AMEX60DD002943	-0.131088	0.885763	0.25366	0.654922
AMEX60DD002944	0.0846777	0.167548	0.0185043	0.622951
AMEX60DD002949	0.50634	0.245346	-0.011168	0.964001
AMEX60DD002952	0.736214	0.636604	2.41393	0.478962
AMEX60DD002954	0.0565656	0.67336	-0.104794	0.315977
AMEX60DD002955	-0.11659	0.568674	0.000570429	0.996254
AMEX60DD002956	0.064461	0.656155	0.0312672	0.733134
AMEX60DD002957	0.736212	0.636605	2.51147	0.0565242
AMEX60DD002958	-1.9886	0.201441	-0.347244	0.567168
AMEX60DD002966	0.658159	0.573472	-0.553695	0.303093
AMEX60DD002970	0.736208	0.636607	-0.968733	0.342311
AMEX60DD002971	-1.02681	0.509503	-1.44772	0.478272
AMEX60DD002972	0	1	-0.861931	0.580176
AMEX60DD002973	0.469821	0.450559	0.0468641	0.825163
AMEX60DD002977	3.28296	0.0126748	-0.0166453	0.981782
AMEX60DD002979	-0.131089	0.874944	0.490699	0.30058
AMEX60DD002980	0.73621	0.636606	-0.968733	0.272854
AMEX60DD002982	-0.131088	0.911391	0.838734	0.502589
AMEX60DD002983	0.248526	0.00940137	-0.00409356	0.967586
AMEX60DD002988	-0.131087	0.911392	-0.191125	0.811788
AMEX60DD002996	-1.12124	0.500907	0.0312672	0.975549
AMEX60DD002997	-0.131152	0.92748	0.752898	0.568149
AMEX60DD002998	-0.131153	0.927479	-0.290661	0.763922
AMEX60DD003000	-1.12124	0.500906	0.926507	0.552132
AMEX60DD003003	0.380809	0.136989	0.110123	0.465465
AMEX60DD003007	1.698	0.275862	-0.620809	0.373463
AMEX60DD003008	0.802345	0.630064	0.446305	0.482959
AMEX60DD003009	-1.12124	0.500907	-0.861932	0.580176
AMEX60DD003010	0.927952	0.274267	0.460349	0.356051
AMEX60DD003011	0.312517	0.410958	1.40978	0.0633203
AMEX60DD003015	-1.12124	0.500906	-0.928486	0.577285
AMEX60DD003016	0.453873	0.0336344	-0.0875189	0.473663
AMEX60DD003020	-0.175484	0.48809	0.233311	0.143449
AMEX60DD003022	0.131945	0.879946	-0.290661	0.54806
AMEX60DD003023	0.0362049	0.840232	0.153703	0.150164
AMEX60DD003024	-1.02681	0.509502	-0.106236	0.866164
AMEX60DD003028	-0.394123	0.651881	-0.191125	0.736303
AMEX60DD003031	-1.02681	0.509504	-0.705698	0.502985
AMEX60DD003032	0.283948	0.796642	0.168771	0.788901
AMEX60DD003033	-1.93844	0.0937778	0.177911	0.824735
AMEX60DD003034	-1.61171	0.263929	0.294302	0.633769
AMEX60DD003036	-0.453017	0.639717	-0.331303	0.519296
AMEX60DD003037	-0.716051	0.441947	1.56178	0.00512439
AMEX60DD003038	-0.616516	0.302018	-0.323436	0.378196
AMEX60DD003042	-1.12124	0.500906	-0.616544	0.508341
AMEX60DD003044	-0.273473	0.692307	0.0913882	0.756363
AMEX60DD003045	-0.503058	0.280227	0.20419	0.548291
AMEX60DD003046	1.19077	0.323051	-0.624311	0.726053
AMEX60DD003047	-0.220216	0.117529	0.113578	0.194543
AMEX60DD003048	-0.0660464	0.347401	0.0494586	0.271008
AMEX60DD003049	0.802345	0.630064	0.0333093	0.984047
AMEX60DD003050	-0.716052	0.346336	0.0312672	0.937715
AMEX60DD003051	0	1	-0.646804	0.431619
AMEX60DD003056	0	1	-0.38377	0.622328
AMEX60DD003068	-1.12124	0.500907	2.8883	0.0365243
AMEX60DD003080	1.698	0.275862	0.616229	0.639852
AMEX60DD003084	0.0383594	0.7225	0.00712458	0.92874
AMEX60DD003085	-0.0781755	0.531544	0.0108951	0.833066
AMEX60DD003105	0.277804	0.338842	-0.040286	0.706855
AMEX60DD003110	1.698	0.275861	0	1
AMEX60DD003115	0.330358	0.0469065	-0.0966889	0.0538499
AMEX60DD003116	0.0514352	0.65039	-0.158387	0.0425454
AMEX60DD003117	0.305009	0.349899	0.0312672	0.874045
AMEX60DD003119	2.86884	0.00788346	0.201192	0.684834
AMEX60DD003120	0.393512	0.432413	-0.235378	0.164403
AMEX60DD003127	-0.197585	0.313227	-0.0048522	0.964037
AMEX60DD003128	0.328342	0.624277	0.353195	0.465451
AMEX60DD003130	0.255933	0.495915	0.383253	0.0828961
AMEX60DD003131	0.113413	0.388398	0.0154257	0.84861
AMEX60DD003132	0.175241	0.0815068	-0.142705	0.0147241
AMEX60DD003133	0.283948	0.46608	0.527225	0.0808622
AMEX60DD003134	0.605873	0.565254	-0.248841	0.632708
AMEX60DD003136	-0.301015	0.390459	-0.226571	0.504322
AMEX60DD003138	0	1	-2.40869	0.095003
AMEX60DD003140	-0.301014	0.667637	0.0312672	0.941411
AMEX60DD003153	0.453808	0.730039	0.154414	0.862461
AMEX60DD003154	1.0913	0.273001	0.861342	0.15189
AMEX60DD003155	2.05813	0.125421	-0.646804	0.431619
AMEX60DD003158	-0.716051	0.586646	-0.968733	0.120973
AMEX60DD003160	-2.02674	0.142294	-0.45416	0.590838
AMEX60DD003165	-1.9886	0.201441	0.0312672	0.970056
AMEX60DD003166	-0.159444	0.923749	-0.705698	0.502985
AMEX60DD003167	-0.131154	0.927478	0.25366	0.751979
AMEX60DD003173	0.736208	0.636607	-0.290661	0.671028
AMEX60DD003174	-0.159447	0.923748	-2.13866	0.0579204
AMEX60DD003176	-0.147484	0.337573	-0.258239	0.00342811
AMEX60DD003178	-1.02681	0.509502	1.51147	0.29479
AMEX60DD003179	0.802345	0.630064	1.03127	0.243091
AMEX60DD003181	0.802345	0.630064	-0.968733	0.438131
AMEX60DD003183	0.0133002	0.967155	-0.147439	0.477484
AMEX60DD003186	-0.00993134	0.928714	-0.0144418	0.787401
AMEX60DD003192	1.698	0.275862	-0.191125	0.811788
AMEX60DD003193	-1.38485	0.00367198	0.0170882	0.967545
AMEX60DD003197	-1.02681	0.509504	-0.968732	0.438132
AMEX60DD003199	-0.11217	0.617247	-0.0101167	0.922653
AMEX60DD003203	-0.169564	0.471726	0.0131199	0.935376
AMEX60DD003204	0.0547019	0.677001	0.0278417	0.627635
AMEX60DD003205	-0.372098	0.275515	0.323033	0.205839
AMEX60DD003206	-0.0993225	0.797236	-0.405597	0.0535231
AMEX60DD003210	-0.102681	0.179633	-0.0876831	0.142753
AMEX60DD003216	0.0523563	0.565337	0.0385098	0.682636
AMEX60DD003217	1.4538	0.216312	0.0312672	0.954274
AMEX60DD003218	-1.45301	0.228674	-1.13866	0.189047
AMEX60DD003225	-1.12124	0.500907	1.42527	0.721621
AMEX60DD003229	-0.716051	0.586646	0.61623	0.295436
AMEX60DD003234	0.190839	0.732694	0.21768	0.553318
AMEX60DD003235	1.28395	0.188655	1.25366	0.207937
AMEX60DD003249	0.802347	0.630063	0.0333093	0.984047
AMEX60DD003250	0.220498	0.0356598	-0.0620334	0.342806
AMEX60DD003257	-2.5735	0.0744532	-2.18386	0.103947
AMEX60DD003261	3.26364	0.172989	-0.446622	0.533058
AMEX60DD003262	0.868845	0.486107	0.0312672	0.970056
AMEX60DD003265	-0.159446	0.923748	-0.873655	0.751275
AMEX60DD003266	1.24742	0.100366	-0.21666	0.658058
AMEX60DD003267	-0.131089	0.816803	-0.928486	0.577285
AMEX60DD003269	-1.12124	0.500906	1.03127	0.409143
AMEX60DD003271	-1.13109	0.365308	1.07261	0.622076
AMEX60DD003273	-0.097923	0.402339	-0.101778	0.157927
AMEX60DD003274	-0.559933	0.0340075	0.195654	0.193448
AMEX60DD003276	-1.61171	0.263929	-0.438218	0.403981
AMEX60DD003279	0.579403	0.293995	-0.212004	0.448848
AMEX60DD003290	-0.186585	0.509679	-0.035847	0.841873
AMEX60DD003292	0.802343	0.630065	1.03127	0.15282
AMEX60DD003295	0	1	-0.705698	0.502985
AMEX60DD003297	0.716907	0.372981	0.735075	0.363866
AMEX60DD003298	0.131946	0.879946	0.446305	0.482959
AMEX60DD003299	-0.13109	0.897751	0.41829	0.265754
AMEX60DD003303	-1.61171	0.263929	-0.553695	0.400434
AMEX60DD003313	-2.02674	0.142294	0.399208	0.635563
AMEX60DD003316	0.86891	0.2715	-0.51622	0.32017
AMEX60DD003317	-0.546125	0.620154	-0.454159	0.590838
AMEX60DD003326	1.56935	0.0571067	0.11873	0.813221
AMEX60DD003328	1.66848	0.702629	0.446305	0.685448
AMEX60DD003338	0.736208	0.636607	0.353195	0.715148
AMEX60DD003339	1.698	0.275862	-0.231767	0.790776
AMEX60DD003343	-1.45301	0.228674	-0.776088	0.224838
AMEX60DD003359	-0.13109	0.659588	-0.218925	0.295214
AMEX60DD003360	-0.131089	0.831252	-0.290661	0.501858
AMEX60DD003363	-1.13109	0.152315	0.194766	0.623692
AMEX60DD003366	-1.12961	0.549773	0.156798	0.794579
AMEX60DD003370	0	1	0.0333093	0.984047
AMEX60DD003383	0.453802	0.730042	0.0312672	0.952671
AMEX60DD003386	0.354337	0.674883	0.101657	0.821571
AMEX60DD003388	-0.0486271	0.920612	0.446305	0.22432
AMEX60DD003397	-1.25014	0.333068	-0.38377	0.486068
AMEX60DD003398	0.736214	0.636604	1.4907	0.0767795
AMEX60DD003400	-0.0268783	0.796963	0.0484084	0.318534
AMEX60DD003410	0.86891	0.0762166	-0.357195	0.256011
AMEX60DD003414	0.802293	0.855555	0.0312672	0.978824
AMEX60DD003418	-0.394123	0.65188	0.113729	0.815691
AMEX60DD003421	-0.453016	0.639717	0.168771	0.788901
AMEX60DD003422	0.736211	0.636605	-0.290661	0.763922
AMEX60DD003425	-0.131089	0.885762	-0.0682684	0.898673
AMEX60DD003430	0	1	0.995105	0.550277
AMEX60DD003433	-0.821302	0.493327	-0.290661	0.602927
AMEX60DD003434	-0.159447	0.923748	1.03127	0.409143
AMEX60DD003435	-1.12124	0.500907	3.21023	0.0168387
AMEX60DD003443	0.802345	0.630064	-0.968733	0.342311
AMEX60DD003449	0.698985	0.244911	-0.08421	0.836632
AMEX60DD003454	-0.131156	0.927477	3.69566	0.00441195
AMEX60DD003455	-0.172279	0.852481	0.215692	0.469508
AMEX60DD003456	0.453872	0.625991	-1.8432	0.0498191
AMEX60DD003457	-1.02681	0.509503	-1.14889	0.0459014
AMEX60DD003458	-0.131153	0.927479	-0.776087	0.390749
AMEX60DD003465	0.137658	0.306719	-0.0722827	0.54114
AMEX60DD003467	-1.12124	0.500906	-0.843202	0.249482
AMEX60DD003469	-0.131089	0.91139	0.809444	0.473485
AMEX60DD003470	-0.177632	0.493064	-0.0942637	0.558094
AMEX60DD003472	0.0209134	0.974831	0.137709	0.844975
AMEX60DD003476	-1.9886	0.201441	1.5114	0.294945
AMEX60DD003478	-2.98935	0.487965	1.8883	0.225596
AMEX60DD003479	-0.224199	0.665452	-0.109595	0.551825
AMEX60DD003481	-0.119655	0.253887	0.0737506	0.282818
AMEX60DD003484	-0.13109	0.874944	-0.316656	0.58592
AMEX60DD003485	0.605875	0.565254	0.819284	0.459434
AMEX60DD003486	-1.9886	0.201442	-0.326315	0.831128
AMEX60DD003487	0.0112435	0.919165	0.0498032	0.323718
AMEX60DD003488	-1.12124	0.500906	0.564872	0.572202
AMEX60DD003491	1.73621	0.208765	1.03127	0.31206
AMEX60DD003492	0.802344	0.630065	-2.44689	0.0631777
AMEX60DD003493	0.802346	0.630064	-0.553695	0.466494
AMEX60DD003494	0.605874	0.565254	-0.968732	0.272854
AMEX60DD003495	0.0852039	0.0391785	-0.0453442	0.306678
AMEX60DD003498	-0.353481	0.659649	0.146744	0.79943
AMEX60DD003499	-0.187673	0.642356	0.122415	0.47407
AMEX60DD003502	0.19925	0.1777	0.0489383	0.566373
AMEX60DD003503	0.802343	0.630065	-0.553695	0.674176
AMEX60DD003504	-0.13256	0.514512	0.103518	0.497515
AMEX60DD003510	1.54698	0.0363589	0.279195	0.568446
AMEX60DD003512	1.698	0.275861	0.0333093	0.984047
AMEX60DD003518	-0.0192759	0.782885	0.0494234	0.270885
AMEX60DD003519	0.802346	0.630064	0.588961	0.67074
AMEX60DD003520	1.698	0.275863	-0.209741	0.722686
AMEX60DD003525	0.413906	0.0843467	-0.0243808	0.872126
AMEX60DD003529	-0.25662	0.670015	0.436591	0.514622
AMEX60DD003533	-0.0662679	0.443668	0.103417	0.0616672
AMEX60DD003534	0.802347	0.630063	-2.82373	0.0409248
AMEX60DD003535	0.453806	0.73004	0.223912	0.764266
AMEX60DD003536	1.19077	0.323052	-0.209741	0.722686
AMEX60DD003537	0.453873	0.625991	0.191732	0.690572
AMEX60DD003547	-1.12124	0.500907	-1.82373	0.241864
AMEX60DD003550	0.0439968	0.451976	0.0445285	0.205008
AMEX60DD003552	-1.13109	0.365308	-0.331303	0.648619
AMEX60DD003553	2.32116	0.0779883	-0.483306	0.239026
AMEX60DD003554	-0.0284251	0.733957	0.00749903	0.856287
AMEX60DD003558	-1.90492	0.663307	2.34109	0.263801
AMEX60DD003559	0.11622	0.510408	-0.00802189	0.943023
AMEX60DD003565	-0.0697573	0.47906	0.0357556	0.484427
AMEX60DD003566	1.698	0.275863	1.0132	0.156319
AMEX60DD003569	-0.163039	0.416146	0.174334	0.20183
AMEX60DD003570	-0.168823	0.248657	0.0283097	0.747704
AMEX60DD003572	-0.13627	0.0535376	-0.0316925	0.435545
AMEX60DD003576	-0.159444	0.923749	1.51147	0.29479
AMEX60DD003581	0.605875	0.565253	0.924685	0.411726
AMEX60DD003589	0.28395	0.715531	0.645581	0.571924
AMEX60DD003591	0	1	0.353195	0.715148
AMEX60DD003601	0.0722816	0.427333	0.0472088	0.53356
AMEX60DD003603	0.236455	0.0874517	-0.0343808	0.69291
AMEX60DD003608	0.16025	0.324445	-0.020204	0.90519
AMEX60DD003611	-0.0379804	0.826065	0.0207237	0.836952
AMEX60DD003619	-1.12124	0.500906	1.35319	0.262253
AMEX60DD003624	2.28297	0.113549	0.446305	0.685448
AMEX60DD003627	0.157377	0.890764	-0.0391221	0.930837
AMEX60DD003642	0.354337	0.674883	0.0312672	0.95112
AMEX60DD003644	-1.02681	0.509504	2.20119	0.0509682
AMEX60DD003652	1.698	0.275861	-1.82373	0.241864
AMEX60DD003654	0.453809	0.730039	-0.968733	0.438132
AMEX60DD003657	0.0377589	0.742398	0.144387	0.0309112
AMEX60DD003660	2.28296	0.11355	-0.492465	0.753138
AMEX60DD003670	-0.327513	0.322881	0.0233185	0.87763
AMEX60DD003672	-0.0219884	0.811671	-0.0841489	0.358191
AMEX60DD003674	0.037256	0.61645	0.00458327	0.919971
AMEX60DD003677	-0.80916	0.325201	0.201192	0.774114
AMEX60DD003678	0.45381	0.730038	-0.45416	0.590838
AMEX60DD003679	1.73621	0.208767	0.223912	0.764266
AMEX60DD003680	1.32117	0.359787	0.294302	0.736203
AMEX60DD003683	-0.0172699	0.920426	0.10282	0.337124
AMEX60DD003686	-0.300772	0.531919	0.0514451	0.831167
AMEX60DD003687	-1.12124	0.500907	-1.55369	0.106222
AMEX60DD003688	-1.12124	0.500906	1.35319	0.262253
AMEX60DD003689	0.264839	0.546407	-0.38138	0.0141003
AMEX60DD003690	-0.159446	0.923748	0.805227	0.650489
AMEX60DD003692	0.868908	0.394349	0.0312672	0.96333
AMEX60DD003696	-0.159449	0.923747	-0.553695	0.674176
AMEX60DD003700	0.00779356	0.932078	-0.010553	0.84954
AMEX60DD003703	0.149018	0.0390342	-0.0590854	0.162178
AMEX60DD003704	-0.121036	0.477308	-0.0637293	0.534956
AMEX60DD003705	-1.12124	0.500906	-0.38377	0.727624
AMEX60DD003707	-0.0122638	0.993981	1.61623	0.0174785
AMEX60DD003709	-0.13109	0.911389	-0.290661	0.671028
AMEX60DD003712	-0.0990287	0.425165	0.0761931	0.280594
AMEX60DD003715	0.156891	0.454617	-0.00249371	0.986031
AMEX60DD003716	0.283948	0.715533	0.645977	0.0488348
AMEX60DD003718	0	1	1.4907	0.0767795
AMEX60DD003723	-0.716049	0.586647	0.28328	0.851604
AMEX60DD003724	0.802346	0.630064	2.51147	0.056524
AMEX60DD003731	0.868839	0.486109	0.924352	0.171724
AMEX60DD003732	-0.159444	0.923749	1.12023	0.236496
AMEX60DD003733	0.802343	0.630065	-0.409305	0.420541
AMEX60DD003734	1.698	0.275862	0.0312672	0.965426
AMEX60DD003735	0.736211	0.636605	-1.41719	0.722883
AMEX60DD003736	2.28296	0.11355	-0.38377	0.622328
AMEX60DD003737	2.28296	0.11355	0.768233	0.465908
AMEX60DD003738	0.508949	0.821186	-0.647011	0.435041
AMEX60DD003740	-1.02681	0.509502	0.61623	0.34937
AMEX60DD003742	-0.371141	0.0414613	-0.0574179	0.594571
AMEX60DD003745	-0.131089	0.897752	0.146744	0.79943
AMEX60DD003746	-0.546126	0.620153	-0.106236	0.866164
AMEX60DD003747	3.50535	0.0069235	-0.88627	0.136166
AMEX60DD003748	-1.12124	0.500905	-0.81673	0.310128
AMEX60DD003749	1.32117	0.359789	0.124377	0.810425
AMEX60DD003750	0.453873	0.550565	-0.279073	0.471762
AMEX60DD003754	-0.159445	0.923749	-0.38377	0.727624
AMEX60DD003762	0	1	-0.968732	0.342311
AMEX60DD003764	-0.230209	0.0828119	-0.0311368	0.622609
AMEX60DD003780	-1.12124	0.500906	0.0312672	0.982709
AMEX60DD003781	0	1	1.51147	0.29479
AMEX60DD003782	1.32117	0.359786	0.332772	0.817256
AMEX60DD003785	0.264839	0.393666	0.134772	0.459589
AMEX60DD003788	0.704628	0.180348	-0.635309	0.00618692
AMEX60DD003790	-0.159444	0.923749	1.59229	0.383628
AMEX60DD003791	-0.00455746	0.965462	-0.172061	0.0932984
AMEX60DD003795	0.0347759	0.464709	0.00369098	0.896417
AMEX60DD003803	-0.0460818	0.546621	-0.0279715	0.692047
AMEX60DD003811	0.190838	0.6933	0.0913882	0.756363
AMEX60DD003812	-0.159445	0.923749	0.0312672	0.970056
AMEX60DD003813	-0.159443	0.92375	0.926507	0.552132
AMEX60DD003814	-1.98861	0.201441	-0.816729	0.310128
AMEX60DD003818	0.0939768	0.674764	-0.0811677	0.644054
AMEX60DD003820	0.605874	0.565254	-0.453915	0.557805
AMEX60DD003822	-1.02681	0.509503	0.61623	0.639852
AMEX60DD003824	-1.12124	0.500906	-0.290661	0.763922
AMEX60DD003826	-0.159444	0.923749	-1.38377	0.156551
AMEX60DD003827	1.32117	0.359788	-1.12649	0.468529
AMEX60DD003834	0.453806	0.73004	0.294302	0.736203
AMEX60DD003836	-1.12124	0.500906	0.25366	0.751979
AMEX60DD003843	0.00549281	0.984565	0.015892	0.896025
AMEX60DD003848	-1.9886	0.201441	0.0312672	0.982709
AMEX60DD003849	0.109918	0.852463	0.0707956	0.833968
AMEX60DD003850	-0.131089	0.803483	0.0926678	0.825772
AMEX60DD003854	2.28296	0.11355	0.61623	0.417689
AMEX60DD003855	-1.35348	0.17398	0.0312672	0.957662
AMEX60DD003859	0.102823	0.299562	0.00356824	0.96187
AMEX60DD003861	-0.131157	0.927476	0.138182	0.803612
AMEX60DD003862	0.736208	0.636607	0.0312672	0.954274
AMEX60DD003863	-1.02681	0.509503	1.03127	0.243091
AMEX60DD003865	0	1	1.03127	0.31206
AMEX60DD003869	-0.914552	0.40141	0.181583	0.826472
AMEX60DD003870	0	1	-1.38377	0.156551
AMEX60DD003877	-0.159444	0.923749	0.926507	0.552132
AMEX60DD003882	-0.131089	0.91139	0.768232	0.465908
AMEX60DD003884	-0.716052	0.441946	0.105268	0.819832
AMEX60DD003885	-0.131153	0.927479	-1.38377	0.156551
AMEX60DD003893	0.453806	0.73004	-0.38377	0.486068
AMEX60DD003896	-0.0723459	0.360713	0.00670264	0.918448
AMEX60DD003898	-0.270815	0.29652	0.1738	0.373919
AMEX60DD003899	-0.230625	0.336102	-0.25389	0.109006
AMEX60DD003900	0.453807	0.73004	-1.29066	0.284947
AMEX60DD003904	-1.9886	0.201441	-0.0956649	0.965924
AMEX60DD003906	-0.426893	0.14357	-0.0942637	0.506631
AMEX60DD003913	2.54356	0.0500493	0.768233	0.144756
AMEX60DD003919	-0.159445	0.923749	1.03127	0.409143
AMEX60DD003924	-0.0348743	0.925451	0.207424	0.358148
AMEX60DD003925	-0.103075	0.716953	-0.0618265	0.815839
AMEX60DD003931	-0.00790517	0.866882	0.0735034	0.0948598
AMEX60DD003933	0.0310674	0.656651	0.08444	0.046891
AMEX60DD003934	-1.98861	0.201441	0.500752	0.340276
AMEX60DD003935	2.7362	0.0330402	0.409779	0.499499
AMEX60DD003936	-0.13109	0.911389	-0.316656	0.58592
AMEX60DD003937	-2.02674	0.142294	0.0312672	0.975549
AMEX60DD003943	0.0823773	0.158667	-0.0289067	0.558908
AMEX60DD003956	-1.13109	0.267534	-0.08421	0.836632
AMEX60DD003957	0.605877	0.565252	0.709339	0.222579
AMEX60DD003958	-1.12124	0.500906	-0.120736	0.855473
AMEX60DD003959	-1.12124	0.500906	-0.258239	0.690449
AMEX60DD003965	-0.131089	0.791077	0.223912	0.502502
AMEX60DD003967	0.00461588	0.93894	0.0375398	0.384499
AMEX60DD003968	0.0296305	0.797063	0.0384988	0.594008
AMEX60DD003973	-0.546126	0.620153	-0.620809	0.373463
AMEX60DD003974	-0.242121	0.545408	0.298748	0.260746
AMEX60DD003975	-1.02681	0.509503	0.353195	0.715148
AMEX60DD003976	0.802345	0.630064	0.0312672	0.982709
AMEX60DD003979	-1.02681	0.509504	-0.553694	0.674176
AMEX60DD003981	-0.25662	0.670015	0.414596	0.299782
AMEX60DD003982	0.868838	0.48611	0.311552	0.724673
AMEX60DD003989	0.113015	0.122718	0.0107351	0.809114
AMEX60DD003993	0.053324	0.823498	-0.156593	0.168679
AMEX60DD003995	0.113644	0.370832	-0.11915	0.058072
AMEX60DD003996	-0.114814	0.16099	-0.0361773	0.424189
AMEX60DD003997	1.32117	0.359787	-0.161378	0.828885
AMEX60DD003998	-1.02889	0.689058	1.04449	0.305131
AMEX60DD004001	-1.12124	0.500905	1.03127	0.409143
AMEX60DD004003	-0.671658	0.234584	0.306902	0.331842
AMEX60DD004006	0.119647	0.368949	-0.0110347	0.867277
AMEX60DD004007	0.0615552	0.934297	0.0326416	0.953582
AMEX60DD004009	0.446455	0.0535347	0.0379619	0.784748
AMEX60DD004010	0.0913034	0.909433	0.178109	0.50307
AMEX60DD004019	-0.0476738	0.82803	-0.00765176	0.95183
AMEX60DD004023	-2.5735	0.0744533	0.991909	0.55007
AMEX60DD004024	-0.256621	0.340666	-0.293974	0.156379
AMEX60DD004025	-0.1638	0.229194	0.0082369	0.917012
AMEX60DD004026	-0.188401	0.177501	-0.0101893	0.887858
AMEX60DD004027	-0.0988865	0.173371	0.0349796	0.47533
AMEX60DD004028	-0.163278	0.137712	0.00855059	0.909473
AMEX60DD004029	-0.153616	0.184473	0.00543251	0.93834
AMEX60DD004031	0.128153	0.459978	-0.0437461	0.68197
AMEX60DD004032	-0.155635	0.242738	-0.0512007	0.618963
AMEX60DD004036	0.145564	0.407551	-0.0987933	0.377392
AMEX60DD004037	0.006414	0.991882	0.289579	0.290113
AMEX60DD004038	-1.02681	0.509503	0.0312672	0.982709
AMEX60DD004040	0.000503604	0.997257	-0.118936	0.231187
AMEX60DD004042	-0.0282589	0.783776	0.0312674	0.712586
AMEX60DD004044	-0.716049	0.586647	1.25366	0.207937
AMEX60DD004052	0.0820686	0.344205	-0.0501021	0.606292
AMEX60DD004056	0.105949	0.322118	0.000303758	0.996284
AMEX60DD004058	0.263667	0.0532092	-0.03364	0.691886
AMEX60DD004063	0	1	-0.553695	0.674176
AMEX60DD004069	0.00342005	0.97603	0.0492094	0.473191
AMEX60DD004083	0.0353911	0.700169	0.072221	0.201297
AMEX60DD004091	0	1	0.294302	0.633769
AMEX60DD004096	0.0342851	0.785966	-0.0304816	0.907584
AMEX60DD004099	0.0371816	0.794003	0.00105261	0.990147
AMEX60DD004107	0.0890803	0.407791	0.0235611	0.675915
AMEX60DD004109	-0.831529	0.199613	0.134361	0.727656
AMEX60DD004112	-0.71605	0.586647	0.146744	0.79943
AMEX60DD004114	-1.12124	0.500907	0.926508	0.552132
AMEX60DD004115	-0.32701	0.219342	0.108229	0.516047
AMEX60DD004124	-0.645663	0.0422878	0.071326	0.787119
AMEX60DD004130	-0.235879	0.809183	0.61623	0.295436
AMEX60DD004136	3.01993	0.0245427	-0.968732	0.220222
AMEX60DD004143	0.761995	0.259896	-0.200058	0.625054
AMEX60DD004144	0.802346	0.630064	0.25366	0.751979
AMEX60DD004145	-0.0206256	0.777292	0.403236	0.0529399
AMEX60DD004149	-1.02681	0.509504	0.294302	0.736203
AMEX60DD004151	-0.0445206	0.541522	0.0237264	0.593705
AMEX60DD004153	0	1	-1.82373	0.241864
AMEX60DD004164	-0.0182523	0.888474	-0.0589621	0.585727
AMEX60DD004165	0.010139	0.938486	0.0689596	0.263479
AMEX60DD004167	-0.13109	0.791076	0.128564	0.674404
AMEX60DD004169	-0.394124	0.523458	0.429817	0.292002
AMEX60DD004171	0.0963206	0.441881	0.0573799	0.740565
AMEX60DD004172	0.000700059	0.996998	0.0818732	0.533946
AMEX60DD004181	0.531875	0.317397	-0.461773	0.203494
AMEX60DD004182	0.164185	0.0119693	-0.0248636	0.522827
AMEX60DD004183	-0.481407	0.185447	-0.577745	0.0175042
AMEX60DD004186	-2.02674	0.142294	-0.646804	0.431619
AMEX60DD004187	-0.13109	0.897752	-0.631698	0.235044
AMEX60DD004188	-1.12124	0.500907	0.446304	0.685448
AMEX60DD004191	0.0582187	0.665994	0.0238306	0.744902
AMEX60DD004192	0.736204	0.636608	1.83862	0.111947
AMEX60DD004193	-0.13109	0.490814	-0.0997716	0.382564
AMEX60DD004194	0.120234	0.154922	-0.143365	0.00346468
AMEX60DD004196	2.05814	0.125421	-0.553695	0.552132
AMEX60DD004197	0.73621	0.636606	-0.45416	0.447068
AMEX60DD004198	-0.131089	0.91139	-0.08421	0.836632
AMEX60DD004201	-0.131155	0.927478	-0.428164	0.523015
AMEX60DD004203	1.24742	0.100366	-0.74634	0.123976
AMEX60DD004204	-1.02681	0.509503	0.353195	0.715148
AMEX60DD004205	-0.716049	0.586647	0.709339	0.388436
AMEX60DD004206	-1.19522	0.0238259	-0.124852	0.71013
AMEX60DD004209	-0.0183219	0.919137	0.051112	0.632926
AMEX60DD004211	-0.779617	0.0102174	0.165437	0.498747
AMEX60DD004213	1.698	0.275861	0.0312672	0.982709
AMEX60DD004220	0	1	0.768232	0.465908
AMEX60DD004232	0.868908	0.394349	-0.38377	0.4361
AMEX60DD004234	1.698	0.275861	-0.483306	0.49664
AMEX60DD004235	-0.0202108	0.716209	0.0355735	0.110568
AMEX60DD004240	0	1	-0.705698	0.502985
AMEX60DD004244	0.192073	0.00859342	-0.0324326	0.465975
AMEX60DD004246	0.802345	0.630064	0.768233	0.465908
AMEX60DD004247	0.802345	0.630064	-0.184508	0.874356
AMEX60DD004248	-0.214748	0.382152	-0.0829313	0.684697
AMEX60DD004249	-0.595538	0.588367	0.0586158	0.925427
AMEX60DD004250	0.12895	0.0943049	0.00569885	0.943191
AMEX60DD004260	2.54355	0.0500497	-0.679226	0.218625
AMEX60DD004262	-0.0153375	0.906904	0.0703496	0.396476
AMEX60DD004264	2.698	0.0507872	-0.106236	0.866164
AMEX60DD004266	-0.230726	0.214629	-0.0110791	0.905605
AMEX60DD004268	1.698	0.275862	-1.86193	0.177664
AMEX60DD004272	0.743379	0.0786612	-0.403948	0.0736498
AMEX60DD004274	0.0399879	0.736628	-0.00844962	0.962924
AMEX60DD004279	0.00179546	0.99552	0.226087	0.267257
AMEX60DD004280	-0.0331268	0.915677	0.121465	0.31258
AMEX60DD004308	0.0717272	0.791191	-0.496833	0.00187876
AMEX60DD004310	0.104538	0.348163	-0.0160385	0.818332
AMEX60DD004312	0.546982	0.183482	0.308107	0.254346
AMEX60DD004315	-1.54612	0.113423	-0.161378	0.828885
AMEX60DD004322	-0.836564	0.55891	-0.120736	0.855473
AMEX60DD004323	-0.394124	0.65188	0.085715	0.82881
AMEX60DD004328	-0.13109	0.897752	-0.499247	0.424849
AMEX60DD004330	0.634445	0.269821	0.0677931	0.834593
AMEX60DD004333	-0.246567	0.669434	0.353195	0.301961
AMEX60DD004334	0.0289148	0.799136	-0.0420694	0.59393
AMEX60DD004337	0.86891	0.228371	-1.44689	0.315904
AMEX60DD004345	0.283948	0.197581	-0.0524717	0.679375
AMEX60DD004348	-1.12124	0.500906	-0.428164	0.523015
AMEX60DD004353	2.28296	0.11355	-1.84026	0.359479
AMEX60DD004354	0.131946	0.879946	-0.646805	0.173158
AMEX60DD004355	0	1	-2.82373	0.0409248
AMEX60DD004356	-0.159449	0.923747	0.0312672	0.972664
AMEX60DD004357	0	1	0.446305	0.685448
AMEX60DD004361	2.698	0.0507871	-0.555508	0.692522
AMEX60DD004364	0.802341	0.630066	0.223912	0.764266
AMEX60DD004365	-0.131089	0.874944	-0.585404	0.221465
AMEX60DD004368	-0.122775	0.262314	0.0765912	0.223772
AMEX60DD004370	0.270383	0.053183	0.0820716	0.337791
AMEX60DD004373	-0.159447	0.923748	-1.29431	0.22279
AMEX60DD004377	0.802345	0.630064	-2.40869	0.095003
AMEX60DD004389	-0.353482	0.659649	0.146744	0.79943
AMEX60DD004391	1.45387	0.13063	0.959604	0.1723
AMEX60DD004396	0.0397947	0.713731	-0.0585561	0.373114
AMEX60DD004397	0.15375	0.346064	0.000893576	0.990989
AMEX60DD004398	2.28296	0.11355	1.51147	0.29479
AMEX60DD004400	0.00386169	0.98507	-0.0169657	0.806548
AMEX60DD004402	0.264839	0.546406	0.0622941	0.835081
AMEX60DD004403	0.106789	0.128087	0.0752008	0.248898
AMEX60DD004404	-0.109472	0.606979	0.0719092	0.449006
AMEX60DD004411	0.302597	0.641273	0.0312672	0.916326
AMEX60DD004412	-0.590521	0.378373	-1.42816	0.0899905
AMEX60DD004413	0.234366	0.0102171	0.00337783	0.951587
AMEX60DD004417	-0.0403244	0.724635	0.00473774	0.943715
AMEX60DD004424	0.0497588	0.445496	0.0714888	0.0984863
AMEX60DD004427	-0.0663197	0.259686	-0.0106454	0.769068
AMEX60DD004428	0.0897888	0.0447034	0.00143822	0.965066
AMEX60DD004435	-2.33516	0.150311	-0.38377	0.727624
AMEX60DD004443	-0.131089	0.897752	0.223912	0.764266
AMEX60DD004451	-0.159447	0.923748	0.995105	0.550277
AMEX60DD004460	-0.159444	0.923749	0.838622	0.353711
AMEX60DD004461	-1.12124	0.500905	0.905736	0.216082
AMEX60DD004462	0.453804	0.730041	0.659298	0.237603
AMEX60DD004467	0.263541	0.194026	0.136694	0.256275
AMEX60DD004471	0.168471	0.754479	-0.536417	0.0315492
AMEX60DD004474	1.698	0.275862	2.35319	0.0352255
AMEX60DD004479	0	1	1.35319	0.112865
AMEX60DD004490	0.158417	0.806995	-0.240035	0.507595
AMEX60DD004491	-2.5735	0.0744534	0.61623	0.508151
AMEX60DD004492	2.28296	0.11355	-1.29066	0.284946
AMEX60DD004493	-0.0257368	0.916905	0.0076804	0.959332
AMEX60DD004494	-1.9886	0.201442	1.03127	0.409143
AMEX60DD004498	0	1	-0.370066	0.82691
AMEX60DD004503	0.0426707	0.68462	-0.100181	0.0487365
AMEX60DD004514	0.596831	0.0646158	-0.274541	0.0895384
AMEX60DD004523	-0.108832	0.710324	0.214131	0.141026
AMEX60DD004524	0.0305485	0.830312	-0.0740508	0.373115
AMEX60DD004525	-0.0197832	0.870514	0.0226013	0.724728
AMEX60DD004526	0.137483	0.0725069	-0.0364354	0.431723
AMEX60DD004529	-0.124103	0.382073	0.0446566	0.649547
AMEX60DD004530	-1.12124	0.500907	0.768233	0.465908
AMEX60DD004531	-0.159447	0.923748	0.0312672	0.972664
AMEX60DD004532	0.103376	0.828043	0.287607	0.377526
AMEX60DD004536	0.120449	0.777903	-0.0131269	0.958636
AMEX60DD004538	-2.98936	0.487963	0.0312672	0.982709
AMEX60DD004540	-0.195941	0.365054	0.188311	0.180152
AMEX60DD004544	-2.6117	0.0473582	0.0312672	0.975549
AMEX60DD004545	0.736211	0.636605	3.47327	0.00835763
AMEX60DD004550	-0.453018	0.349175	0.113129	0.758435
AMEX60DD004553	-0.159447	0.923748	-1.38377	0.156551
AMEX60DD004556	0.13782	0.0491603	0.0352755	0.385483
AMEX60DD004562	0	1	-0.968733	0.438132
AMEX60DD004563	0.453807	0.73004	-0.191125	0.736303
AMEX60DD004569	0	1	0.446305	0.482959
AMEX60DD004573	-0.10334	0.220166	-0.0272429	0.584439
AMEX60DD004584	-0.175484	0.623941	0.259892	0.187982
AMEX60DD004585	-0.0894421	0.494863	0.105383	0.190601
AMEX60DD004590	1.48558	0.000533726	0.122898	0.632746
AMEX60DD004591	-0.63359	0.244102	-0.149229	0.754528
AMEX60DD004592	0.032209	0.925025	-0.0734302	0.617312
AMEX60DD004593	-0.13109	0.897752	-0.231767	0.707516
AMEX60DD004600	-0.21126	0.534581	-0.409305	0.162974
AMEX60DD004602	-0.546127	0.620152	0.406373	0.67795
AMEX60DD004603	0.73621	0.636606	0.968193	0.805686
AMEX60DD004604	-0.0343366	0.821952	-0.178489	0.265003
AMEX60DD004606	0.316369	0.269223	0.0349004	0.873728
AMEX60DD004608	-0.159694	0.529016	0.157797	0.302151
AMEX60DD004609	-0.202632	0.387032	0.0629761	0.581753
AMEX60DD004611	-0.13109	0.897752	-0.409305	0.420541
AMEX60DD004628	0.802343	0.630065	0.0312672	0.982709
AMEX60DD004634	0.190838	0.843679	1.03127	0.122543
AMEX60DD004642	1.698	0.275862	-0.705698	0.502985
AMEX60DD004645	-0.120146	0.241561	0.0399809	0.635355
AMEX60DD004646	0.0623553	0.411771	0.0656797	0.153037
AMEX60DD004648	-1.9886	0.201441	3.21023	0.0168387
AMEX60DD004649	-1.9886	0.201441	0.838622	0.353711
AMEX60DD004652	-1.02681	0.509503	-0.968732	0.438132
AMEX60DD004653	-1.02681	0.509503	0.768233	0.302457
AMEX60DD004655	0.570752	0.894252	1.90574	0.0425539
AMEX60DD004667	0.11555	0.650415	0.0312672	0.799748
AMEX60DD004668	0.802281	0.855557	1.92651	0.163097
AMEX60DD004669	0.10695	0.377392	0.576135	0.506677
AMEX60DD004676	0.453807	0.73004	-0.968732	0.342311
AMEX60DD004677	-1.12124	0.500907	-0.553695	0.674176
AMEX60DD004683	0.868842	0.486108	0.0312672	0.96333
AMEX60DD004684	0.802347	0.630063	0.353195	0.715148
AMEX60DD004686	0.605876	0.103843	-0.258239	0.329314
AMEX60DD004695	0.0891763	0.527683	0.0258231	0.770763
AMEX60DD004704	0	1	-1.44689	0.315904
AMEX60DD004709	-0.716049	0.586648	1.8883	0.225596
AMEX60DD004713	-0.159444	0.923749	1.03127	0.31206
AMEX60DD004714	1.67619	0.146562	-0.843202	0.249482
AMEX60DD004715	1.32117	0.359787	0.0312672	0.982709
AMEX60DD004716	-0.584423	0.343788	0.388202	0.127925
AMEX60DD004719	-0.716048	0.586648	0.0312672	0.957662
AMEX60DD004726	-2.5735	0.074453	0.0312672	0.975549
AMEX60DD004729	-0.131088	0.91139	-1.19112	0.231523
AMEX60DD004733	-1.61171	0.263929	-0.138658	0.843207
AMEX60DD004734	0.86891	0.102892	-0.928486	0.577285
AMEX60DD004738	0.149018	0.774723	-0.0184858	0.944996
AMEX60DD004740	-0.23366	0.256001	-0.00177304	0.988778
AMEX60DD004744	2.05813	0.125421	0.709339	0.222579
AMEX60DD004747	-1.12124	0.500907	0	1
AMEX60DD004752	-0.716048	0.586648	-1.77609	0.124676
AMEX60DD004754	0.531206	0.361637	-0.479695	0.106956
AMEX60DD004755	0.20622	0.358658	-0.0730159	0.361688
AMEX60DD004759	0.0499024	0.473566	0.0100767	0.80684
AMEX60DD004760	-0.266605	0.12451	-0.00180458	0.986818
AMEX60DD004769	0.802346	0.630064	0.926508	0.552132
AMEX60DD004770	0.802346	0.630064	-1.86193	0.177665
AMEX60DD004782	-1.9886	0.201441	-0.553695	0.674176
AMEX60DD004784	0.283948	0.796642	0.0312672	0.978824
AMEX60DD004787	0.0319036	0.716637	-0.0659724	0.442798
AMEX60DD004793	-1.9886	0.201442	0.0312672	0.978824
AMEX60DD004794	0.736211	0.636605	-1.77609	0.124676
AMEX60DD004795	-1.12124	0.500906	0.0312672	0.978824
AMEX60DD004796	1.73621	0.208766	1.16877	0.133092
AMEX60DD004800	1.698	0.275861	1.03127	0.409143
AMEX60DD004803	0.4003	0.814759	-0.38377	0.622328
AMEX60DD004807	0	1	0.995105	0.550277
AMEX60DD004809	-1.61171	0.26393	2.8883	0.0365243
AMEX60DD004810	-0.0530872	0.874289	-0.140344	0.490146
AMEX60DD004811	-0.159447	0.923748	1.35319	0.262253
AMEX60DD004813	-0.71605	0.586647	-0.231767	0.790776
AMEX60DD004816	0.802342	0.630065	0.0312672	0.975549
AMEX60DD004819	0.0913034	0.909433	0.647939	0.175977
AMEX60DD004823	-0.311662	0.541979	-0.161378	0.759867
AMEX60DD004837	0	1	1.8883	0.225596
AMEX60DD004838	-0.235886	0.154995	-0.0147802	0.888303
AMEX60DD004840	-1.13109	0.267534	1.20119	0.050061
AMEX60DD004846	0.802342	0.630065	1.03127	0.409143
AMEX60DD004847	-2.98854	0.0304941	-0.109126	0.90873
AMEX60DD004848	2.28296	0.11355	-0.12468	0.927719
AMEX60DD004849	2.05814	0.125421	-0.290661	0.671028
AMEX60DD004851	0.076715	0.276636	0.00565659	0.918806
AMEX60DD004857	0	1	0.0312672	0.975549
AMEX60DD004859	-1.38265	0.0855394	0.0548203	0.889732
AMEX60DD004860	0.802347	0.630063	-0.861932	0.580176
AMEX60DD004866	0.802345	0.630064	1.35319	0.262253
AMEX60DD004869	0.73621	0.636606	0.768233	0.465908
AMEX60DD004882	-0.175484	0.623941	-0.38377	0.727624
AMEX60DD004888	0.0874808	0.423463	-0.0618422	0.347659
AMEX60DD004893	-0.107631	0.354951	0.0334953	0.676132
AMEX60DD004896	0.73621	0.636606	-1.29066	0.284947
AMEX60DD004897	2.698	0.0507869	-0.968733	0.342311
AMEX60DD004899	-0.300063	0.149938	-0.05567	0.699551
AMEX60DD004903	1.32117	0.359786	0.0312672	0.975549
AMEX60DD004904	0.0663908	0.459338	-0.0472916	0.36274
AMEX60DD004906	-0.0236199	0.880344	0.00143966	0.981224
AMEX60DD004907	0.106522	0.411139	0.0435108	0.570688
AMEX60DD004912	0.299545	0.450574	0.209054	0.409643
AMEX60DD004914	-0.159444	0.923749	-0.968732	0.342311
AMEX60DD004915	3.50535	0.00692346	-0.347244	0.567168
AMEX60DD004917	0.0669143	0.417884	0.0186082	0.706107
AMEX60DD004919	0.802343	0.630065	0.294302	0.736203
AMEX60DD004920	-1.98861	0.20144	-0.104849	0.933702
AMEX60DD004927	0.736212	0.636605	-2.88268	0.426831
AMEX60DD004928	0	1	0.0312672	0.982709
AMEX60DD004931	-0.0510163	0.471733	0.00255592	0.95303
AMEX60DD004932	1.698	0.275861	-0.928486	0.577285
AMEX60DD004935	0.174846	0.15097	0.0277825	0.695185
AMEX60DD004937	0.135363	0.245142	0.00859816	0.899899
AMEX60DD004938	-0.0156123	0.978434	-0.231767	0.553024
AMEX60DD004939	-1.9886	0.201441	-1.86193	0.177664
AMEX60DD004943	0.283948	0.715532	-0.705698	0.343516
AMEX60DD004944	-0.234926	0.33741	-0.0644918	0.646307
AMEX60DD004946	0	1	-0.553695	0.674176
AMEX60DD004947	-1.61171	0.26393	-0.231767	0.790776
AMEX60DD004948	1.698	0.275861	0.995105	0.550277
AMEX60DD004955	3.28296	0.0126748	-0.74634	0.27671
AMEX60DD004958	-0.13109	0.712058	-0.626944	0.00652892
AMEX60DD004959	-2.13109	0.00823153	0.294302	0.45127
AMEX60DD004963	0	1	0.0312672	0.978824
AMEX60DD004966	-0.80916	0.325201	-0.210543	0.837329
AMEX60DD004967	0.546982	0.346946	0.0312672	0.908697
AMEX60DD004970	0.802344	0.630065	-0.290661	0.763922
AMEX60DD004971	-1.12124	0.500907	-0.861932	0.580176
AMEX60DD004972	-0.131088	0.911391	-0.331303	0.648619
AMEX60DD004974	0.605876	0.565253	1.61623	0.0523322
AMEX60DD004976	-0.0284041	0.875654	-0.0454701	0.829992
AMEX60DD004977	-0.159445	0.923749	-0.553695	0.674176
AMEX60DD004978	0	1	-2.82373	0.0409247
AMEX60DD004979	-0.207009	0.931774	-0.08421	0.884073
AMEX60DD004980	-0.0652019	0.636354	0.0580341	0.509034
AMEX60DD004983	1.32117	0.359787	0.0312672	0.961348
AMEX60DD004993	1.698	0.275862	-1.86193	0.177665
AMEX60DD004994	0.0919715	0.245576	-0.0395682	0.534896
AMEX60DD005001	0	1	-0.861931	0.580176
AMEX60DD005005	0.239554	0.214747	0.022952	0.834017
AMEX60DD005006	0.0106445	0.988902	0.165568	0.595031
AMEX60DD005008	0.736214	0.636604	0.0312672	0.970056
AMEX60DD005010	0.0870905	0.75666	-0.0502627	0.7432
AMEX60DD005011	0.453807	0.73004	2.03127	0.0749199
AMEX60DD005015	-1.12124	0.500906	0.0696633	0.958311
AMEX60DD005018	-0.102436	0.244797	-0.0413709	0.3836
AMEX60DD005019	0.716907	0.37298	-0.0914005	0.922999
AMEX60DD005021	-0.519655	0.0442892	0.270054	0.0916636
AMEX60DD005023	0.453807	0.73004	-0.281747	0.806682
AMEX60DD005028	-1.13109	0.152315	-0.612589	0.18475
AMEX60DD005032	-1.12124	0.500906	-1.38377	0.156551
AMEX60DD005033	-1.12124	0.500907	-0.985114	0.560681
AMEX60DD005034	0.427401	0.0899679	0.144649	0.362106
AMEX60DD005035	0.394979	0.292977	0.214713	0.404501
AMEX60DD005036	2.05813	0.125421	0.0312672	0.965426
AMEX60DD005038	0.24218	0.171596	0.00156073	0.983528
AMEX60DD005049	-1.12124	0.500905	-0.852652	0.240077
AMEX60DD005052	0.0698014	0.357625	-0.0473773	0.305972
AMEX60DD005055	0.101571	0.743459	-0.182136	0.442238
AMEX60DD005063	0.0731432	0.584765	-0.133068	0.212705
AMEX60DD005064	0.147952	0.24045	-0.0492364	0.620034
AMEX60DD005065	-0.716051	0.586646	3.09643	0.0149471
AMEX60DD005066	-1.61171	0.263929	-0.191125	0.811788
AMEX60DD005067	0.0550795	0.323602	-0.121332	0.100151
AMEX60DD005076	0.802345	0.630064	0.0312672	0.972664
AMEX60DD005082	0.354337	0.34828	0.112567	0.642141
AMEX60DD005097	0.240277	0.191606	-0.121195	0.280134
AMEX60DD005106	1.24742	0.100365	0.242771	0.591059
AMEX60DD005107	-1.12124	0.500906	0.995105	0.550277
AMEX60DD005110	1.4538	0.216313	0.400641	0.796929
AMEX60DD005112	-1.02681	0.509503	-1.19112	0.231523
AMEX60DD005113	-1.61171	0.263929	-0.861931	0.580176
AMEX60DD005115	-0.00768552	0.899639	0.0464067	0.195438
AMEX60DD005118	-0.210817	0.164651	-0.00155141	0.985498
AMEX60DD005122	-0.0356095	0.806826	0.0621531	0.615025
AMEX60DD005130	1.12447	0.387331	0.272275	0.645031
AMEX60DD005133	-1.12124	0.500906	-0.0942636	0.875617
AMEX60DD005137	-0.131155	0.927478	0.37919	0.514183
AMEX60DD005139	0.0668495	0.658786	-0.0485645	0.708886
AMEX60DD005141	0.86884	0.486109	0.446304	0.566771
AMEX60DD005144	2.28296	0.11355	0.353195	0.605772
AMEX60DD005145	0.25383	0.0527636	-0.0582496	0.607597
AMEX60DD005150	-1.12124	0.500906	1.61623	0.170044
AMEX60DD005151	0.0553234	0.831277	-0.180272	0.427022
AMEX60DD005152	-1.02681	0.509504	0.168771	0.788901
AMEX60DD005153	0.802345	0.630064	0.0333091	0.992347
AMEX60DD005154	-1.61171	0.263929	-0.968732	0.272854
AMEX60DD005155	-0.546126	0.483346	-0.38377	0.622328
AMEX60DD005158	1.698	0.275862	0.879264	0.274541
AMEX60DD005159	0.453806	0.73004	-0.290661	0.671028
AMEX60DD005160	0.802346	0.630064	-0.968732	0.342311
AMEX60DD005161	-0.13109	0.518465	0.0143274	0.91063
AMEX60DD005163	0.802343	0.630065	-1.19112	0.231523
AMEX60DD005164	0.453873	0.550565	-0.264189	0.523747
AMEX60DD005165	0.520376	0.485948	-0.331303	0.197447
AMEX60DD005166	0.73621	0.636606	0.353195	0.715148
AMEX60DD005167	-0.159447	0.923748	-1.87682	0.588023
AMEX60DD005168	1.698	0.275862	-0.618294	0.610094
AMEX60DD005170	0.802344	0.630065	0.346846	0.685389
AMEX60DD005171	-1.61171	0.263929	-0.316656	0.58592
AMEX60DD005172	-2.5735	0.074453	-0.553695	0.466494
AMEX60DD005173	0.283948	0.796642	1.20119	0.165889
AMEX60DD005174	-0.868054	0.409998	-0.553695	0.466494
AMEX60DD005176	-0.159444	0.923749	-0.38377	0.727624
AMEX60DD005177	0.354337	0.674883	-0.179641	0.842875
AMEX60DD005181	1.698	0.275861	0.995105	0.550277
AMEX60DD005182	0.140973	0.0858744	-0.0236085	0.77071
AMEX60DD005183	-2.5735	0.0744532	0.0312672	0.978824
AMEX60DD005189	0.0479927	0.478445	0.0894898	0.141956
AMEX60DD005193	-0.177069	0.405766	0.0395348	0.657513
AMEX60DD005194	-0.131089	0.874944	0.54584	0.183594
AMEX60DD005197	-0.443034	0.218431	-0.2286	0.307873
AMEX60DD005198	-0.131087	0.911391	0.211839	0.678506
AMEX60DD005199	0.138415	0.119415	0.0080909	0.878182
AMEX60DD005208	-1.6117	0.26393	-0.705698	0.502985
AMEX60DD005220	1.698	0.275861	-0.38377	0.727624
AMEX60DD005225	-0.143138	0.12468	0.0383508	0.511129
AMEX60DD005226	-0.0250482	0.891989	-0.171226	0.137953
AMEX60DD005227	0.0236686	0.756175	0.0305366	0.506015
AMEX60DD005229	-1.12124	0.500907	0.516694	0.54077
AMEX60DD005231	-0.394124	0.523458	-0.49864	0.509941
AMEX60DD005233	0.868906	0.39435	0.018317	0.975175
AMEX60DD005234	2.05814	0.125421	0.0312672	0.972664
AMEX60DD005235	0.595785	0.768417	1.25366	0.0291761
AMEX60DD005237	-0.131152	0.92748	0.616229	0.639852
AMEX60DD005239	2.698	0.0507867	1.03127	0.409143
AMEX60DD005240	0.736212	0.636605	0.446304	0.685448
AMEX60DD005241	-1.12124	0.500907	0.446305	0.566771
AMEX60DD005242	-2.39192	0.581728	0.353195	0.715148
AMEX60DD005244	0.736212	0.636605	0.768232	0.465908
AMEX60DD005252	0.0829602	0.624519	0.0930953	0.460968
AMEX60DD005259	0.15131	0.344558	0.0312672	0.724483
AMEX60DD005269	0	1	0.995105	0.550277
AMEX60DD005270	0.0619467	0.401409	0.0952223	0.11305
AMEX60DD005271	1.698	0.275862	1.4463	0.138662
AMEX60DD005272	-1.02681	0.509503	0.320025	0.812016
AMEX60DD005273	0	1	1.51147	0.29479
AMEX60DD005274	2.05813	0.125421	-1.96873	0.0843248
AMEX60DD005275	-0.283092	0.669329	0.188528	0.707953
AMEX60DD005289	1.28394	0.188656	-0.331303	0.519296
AMEX60DD005290	0.0174741	0.864425	-0.008336	0.89436
AMEX60DD005292	0.190839	0.843678	-0.191125	0.736303
AMEX60DD005294	-1.61171	0.263929	1.4463	0.138662
AMEX60DD005297	0.698985	0.244911	-0.324877	0.398877
AMEX60DD005302	-1.13109	0.365307	1.4463	0.0362458
AMEX60DD005303	-0.590521	0.12707	-0.267395	0.348637
AMEX60DD005311	-0.131154	0.927478	-0.331303	0.648619
AMEX60DD005312	-0.131154	0.927478	0.0312672	0.978824
AMEX60DD005315	-0.544943	0.276216	-0.0669132	0.778706
AMEX60DD005316	-0.131155	0.927478	-1.42816	0.0899905
AMEX60DD005317	0.158417	0.806995	-0.705698	0.134206
AMEX60DD005319	-0.420596	0.516581	-0.316656	0.44106
AMEX60DD005325	1.73621	0.208766	-1.19112	0.231523
AMEX60DD005328	-0.105023	0.510138	-0.115982	0.213328
AMEX60DD005330	-0.131089	0.831253	-0.175184	0.748629
AMEX60DD005331	0	1	0.76812	0.46623
AMEX60DD005336	1.03883	0.230815	-0.205772	0.578816
AMEX60DD005339	-0.164878	0.237719	0.0456225	0.616197
AMEX60DD005343	-0.0315535	0.953068	0.260749	0.474599
AMEX60DD005344	0.0250351	0.68145	0.0638878	0.0609176
AMEX60DD005347	1.19077	0.323053	0.616229	0.639852
AMEX60DD005351	-0.0907007	0.42544	-0.00703666	0.917418
AMEX60DD005353	-0.0107076	0.890963	-0.010643	0.822067
AMEX60DD005354	0.802341	0.630066	0.926507	0.552132
AMEX60DD005355	-0.434328	0.413406	0.166197	0.399964
AMEX60DD005357	0.0913027	0.909434	0.478726	0.237135
AMEX60DD005360	-1.36863	0.627789	0.561782	0.369187
AMEX60DD005361	2.28296	0.11355	0.616229	0.639852
AMEX60DD005362	0.0768514	0.442968	0.0105438	0.858897
AMEX60DD005363	-0.0359324	0.905488	0.331662	0.0759302
AMEX60DD005364	-1.02681	0.509503	1.35319	0.262253
AMEX60DD005365	0.032409	0.887551	0.121249	0.391065
AMEX60DD005368	0.267828	0.0214263	-0.02447	0.734089
AMEX60DD005369	-0.919585	0.0924907	-0.31162	0.301044
AMEX60DD005376	0.453806	0.73004	-0.968731	0.438132
AMEX60DD005378	-0.716052	0.102868	0.216823	0.433675
AMEX60DD005380	-0.159445	0.923749	-0.450396	0.804292
AMEX60DD005385	-2.98854	0.0304942	1.2943	0.0919046
AMEX60DD005387	-0.716051	0.586646	-0.606163	0.325404
AMEX60DD005388	-0.131089	0.855796	-0.48558	0.375688
AMEX60DD005389	-0.453018	0.417501	0.0514451	0.831167
AMEX60DD005391	0	1	-0.553695	0.674176
AMEX60DD005393	-0.151554	0.532838	0.152574	0.318174
AMEX60DD005394	0.090787	0.301523	-0.0604946	0.0728198
AMEX60DD005396	-1.29958	0.553085	-0.794703	0.0388379
AMEX60DD005397	-1.12124	0.500907	0.294302	0.736203
AMEX60DD005398	-1.45301	0.228674	-0.454159	0.590838
AMEX60DD005399	-1.02681	0.509503	0.808875	0.238446
AMEX60DD005401	-0.716051	0.586646	1.36716	0.253004
AMEX60DD005403	0.104452	0.0723737	0.00641889	0.856382
AMEX60DD005405	0.255934	0.630167	1.00212	0.00471088
AMEX60DD005406	0	1	-0.566202	0.827484
AMEX60DD005409	1.32117	0.359787	0.294302	0.736203
AMEX60DD005410	0.736212	0.636605	1.3532	0.112865
AMEX60DD005413	0.143711	0.0431212	0.0290086	0.676424
AMEX60DD005415	-0.34498	0.414907	0.123482	0.686328
AMEX60DD005416	0.283948	0.796642	-1.44689	0.315904
AMEX60DD005417	-1.02681	0.509502	1.25366	0.0749353
AMEX60DD005418	-1.61171	0.263929	0.0427801	0.967298
AMEX60DD005419	0.698985	0.244911	0.0578417	0.90063
AMEX60DD005421	1.698	0.275861	0.0312672	0.978824
AMEX60DD005424	0.736214	0.636604	0.0312672	0.982709
AMEX60DD005425	-1.12124	0.500907	-0.928486	0.577285
AMEX60DD005426	-1.9886	0.201441	1.4463	0.138661
AMEX60DD005427	-0.0647473	0.76729	0.307431	0.0151885
AMEX60DD005429	-1.9886	0.201441	0.0312672	0.978824
AMEX60DD005430	0.0399557	0.809542	-0.105823	0.482217
AMEX60DD005434	0.802345	0.630064	2.47326	0.0864666
AMEX60DD005437	0.802343	0.630065	0.926507	0.552132
AMEX60DD005439	-0.938443	0.29936	-0.399367	0.314474
AMEX60DD005446	-0.159447	0.923748	-0.705698	0.502985
AMEX60DD005448	0	1	0.61623	0.639852
AMEX60DD005450	0.0909963	0.229892	0.00224118	0.961428
AMEX60DD005451	0.0275608	0.483113	-0.0707658	0.007335
AMEX60DD005453	0.73621	0.636606	0.446305	0.685448
AMEX60DD005454	1.32117	0.359789	0.467366	0.311136
AMEX60DD005455	-0.159446	0.923748	1.51147	0.29479
AMEX60DD005456	0.736211	0.636605	1.51147	0.294789
AMEX60DD005458	0.187654	0.014612	-0.00318026	0.944868
AMEX60DD005462	1.6762	0.146561	-0.553695	0.347169
AMEX60DD005463	0.802345	0.630064	-0.331303	0.648619
AMEX60DD005464	-1.61171	0.263929	0.0312672	0.982709
AMEX60DD005465	0.736214	0.636604	2.25366	0.0140746
AMEX60DD005466	1.698	0.275862	0.838622	0.353711
AMEX60DD005467	0.694881	0.0708555	-0.316656	0.123363
AMEX60DD005468	-1.12124	0.500907	0.0312672	0.970056
AMEX60DD005469	2.54356	0.0500493	-0.762282	0.103186
AMEX60DD005470	-0.414883	0.148406	0.122415	0.47407
AMEX60DD005471	0.927804	0.0670671	-0.0152754	0.952997
AMEX60DD005472	-0.868053	0.409998	0.54584	0.44264
AMEX60DD005473	0.868841	0.486108	0.496931	0.22932
AMEX60DD005474	1.19077	0.323052	0.294302	0.633769
AMEX60DD005477	-1.12124	0.500907	-0.566739	0.80502
AMEX60DD005478	-1.61171	0.263929	-0.705698	0.502985
AMEX60DD005479	-0.0202058	0.847527	-0.0458662	0.50068
AMEX60DD005480	-1.24657	0.0799978	-0.17155	0.526579
AMEX60DD005481	-1.12124	0.500906	-0.290661	0.763922
AMEX60DD005482	-0.868053	0.409998	0.25366	0.654922
AMEX60DD005486	0	1	-1.44689	0.315904
AMEX60DD005487	-0.131158	0.927476	0.41829	0.43132
AMEX60DD005488	1.73621	0.208767	0.409779	0.499499
AMEX60DD005489	0.00347982	0.962761	0.00689031	0.872763
AMEX60DD005494	3.01993	0.0245427	0.0312672	0.961348
AMEX60DD005498	0.299545	0.450574	-0.15636	0.50218
AMEX60DD005499	0.802347	0.630063	-0.928486	0.577285
AMEX60DD005502	-0.0731318	0.240987	-0.00209976	0.955175
AMEX60DD005505	-0.293955	0.165953	0.00447209	0.975615
AMEX60DD005506	0.736211	0.636605	-0.64637	0.551034
AMEX60DD005507	-0.752909	0.6775	-0.828916	0.295238
AMEX60DD005508	-0.131153	0.927479	0.768232	0.465908
AMEX60DD005527	1.86884	0.100655	-0.21666	0.658058
AMEX60DD005528	-1.12124	0.500906	-0.231767	0.790776
AMEX60DD005529	1.698	0.275862	-0.454159	0.590838
AMEX60DD005530	-1.12124	0.500907	0.926508	0.552132
AMEX60DD005534	-0.716048	0.586648	-0.968732	0.342311
AMEX60DD005535	0.736212	0.636605	0.119007	0.949357
AMEX60DD005536	0.111767	0.658647	-0.113172	0.592059
AMEX60DD005537	0.0633178	0.516733	-0.00292146	0.95937
AMEX60DD005538	0.565983	0.0121929	-0.0654088	0.643215
AMEX60DD005540	0.802343	0.630065	0.61623	0.417689
AMEX60DD005542	1.32117	0.359789	-0.0467353	0.921545
AMEX60DD005544	-1.98861	0.201441	-0.290661	0.763922
AMEX60DD005545	-1.61171	0.26393	0.905736	0.216082
AMEX60DD005553	-1.98861	0.201441	-1.86193	0.177665
AMEX60DD005554	-1.12124	0.500906	0.995105	0.550277
AMEX60DD005559	-0.13109	0.911389	-0.38377	0.727624
AMEX60DD005560	-1.02681	0.509504	-0.861931	0.580176
AMEX60DD005562	-0.131089	0.810017	-0.693098	0.0689892
AMEX60DD005566	-0.394124	0.523457	-0.646805	0.0786628
AMEX60DD005567	0.182327	0.272606	-0.0222961	0.820555
AMEX60DD005568	-0.342594	0.283586	0.121064	0.529311
AMEX60DD005571	0.177032	0.305611	0.0275822	0.789093
AMEX60DD005572	-0.0036862	0.976222	-0.020034	0.718306
AMEX60DD005578	-0.546125	0.620153	-0.110156	0.919161
AMEX60DD005579	-0.131089	0.91139	0.768232	0.465908
AMEX60DD005583	0.142121	0.240895	0.192174	0.450636
AMEX60DD005584	0.0728194	0.520348	-0.226031	0.0938781
AMEX60DD005585	-0.210524	0.446383	0.0843786	0.597559
AMEX60DD005586	0.143831	0.275678	-0.0348851	0.58019
AMEX60DD005587	0.634445	0.269821	-0.057542	0.820212
AMEX60DD005590	0.736212	0.636605	-0.553695	0.674176
AMEX60DD005592	0.802343	0.630065	0.201192	0.774114
AMEX60DD005595	-1.12124	0.500906	0.995105	0.550277
AMEX60DD005596	-0.078238	0.272542	0.0176814	0.747461
AMEX60DD005599	1.698	0.275862	0.0333093	0.984047
AMEX60DD005600	-0.0464274	0.755453	-0.0469998	0.575933
AMEX60DD005603	-0.499713	0.711638	0.372304	0.454975
AMEX60DD005604	0.802343	0.630065	-0.705698	0.502985
AMEX60DD005605	-1.61171	0.263929	0.0312672	0.96333
AMEX60DD005608	-1.12124	0.500906	-0.38377	0.727624
AMEX60DD005614	0.283949	0.796642	1.03127	0.15282
AMEX60DD005619	0.802343	0.630065	-0.968733	0.272854
AMEX60DD005623	0.802346	0.630064	1.25366	0.207937
AMEX60DD005624	-0.159446	0.923748	-0.553695	0.552132
AMEX60DD005632	-0.0322721	0.79229	0.0171187	0.869696
AMEX60DD005636	0.0489809	0.519697	-0.0122997	0.81203
AMEX60DD005638	0.632244	0.673748	0.575588	0.132222
AMEX60DD005640	-2.98854	0.0304941	0.258209	0.800477
AMEX60DD005641	0	1	0.0312672	0.982709
AMEX60DD005645	2.28297	0.113549	2.47327	0.0864665
AMEX60DD005647	-0.546124	0.620154	0.446304	0.685448
AMEX60DD005648	-1.12124	0.500907	0	1
AMEX60DD005649	1.32117	0.359788	-0.38377	0.622328
AMEX60DD005651	-0.0874346	0.270613	-0.00327488	0.947045
AMEX60DD005653	0.0470025	0.781142	-0.173163	0.0864877
AMEX60DD005655	1.0913	0.121087	-0.521274	0.280559
AMEX60DD005656	-0.131155	0.927478	-0.553695	0.466494
AMEX60DD005661	0.0133002	0.967155	0.209266	0.29303
AMEX60DD005668	0	1	-0.553695	0.674176
AMEX60DD005683	1.73621	0.208765	1.35319	0.262253
AMEX60DD005688	0.868842	0.486108	-0.428164	0.523015
AMEX60DD005692	-0.131091	0.911389	0.315007	0.59004
AMEX60DD005699	-0.0854071	0.415167	-0.0378396	0.69614
AMEX60DD005700	0.736214	0.636604	1.35319	0.262253
AMEX60DD005703	-1.45301	0.228675	0.838622	0.353711
AMEX60DD005707	-0.716051	0.586647	0.0312672	0.967658
AMEX60DD005708	0.868846	0.486107	-0.290661	0.671028
AMEX60DD005709	-0.938443	0.29936	0.168771	0.788901
AMEX60DD005716	0.466812	0.12669	0.230576	0.390548
AMEX60DD005720	-0.0810697	0.672205	0.0838877	0.458481
AMEX60DD005721	-0.131158	0.927476	-0.553695	0.400434
AMEX60DD005734	0.137569	0.49198	0.181032	0.422517
AMEX60DD005742	0.802343	0.630065	-0.454159	0.590838
AMEX60DD005743	0.736211	0.636605	0.353195	0.715148
AMEX60DD005747	0	1	0.0312672	0.982709
AMEX60DD005748	1.698	0.275861	0.0333093	0.984047
AMEX60DD005749	-0.157401	0.322455	-0.164952	0.300601
AMEX60DD005751	-0.00807897	0.937014	0.00249086	0.96766
AMEX60DD005752	0.082733	0.186319	0.0343543	0.372598
AMEX60DD005756	0.264839	0.296165	-0.187743	0.291806
AMEX60DD005759	-0.0590786	0.640352	-0.0348545	0.65689
AMEX60DD005762	-0.159443	0.92375	-1.21597	0.449666
AMEX60DD005763	-1.12124	0.500907	-2.40869	0.0950029
AMEX60DD005770	-0.346818	0.326533	-0.149305	0.513595
AMEX60DD005771	-1.12124	0.500906	0.768232	0.465908
AMEX60DD005772	-1.12124	0.500906	0.446304	0.685448
AMEX60DD005773	0.802346	0.630064	1.4463	0.138661
AMEX60DD005774	-2.02674	0.142294	0.0333093	0.984047
AMEX60DD005775	-0.238005	0.544693	0.0918088	0.703641
AMEX60DD005780	0.283949	0.796642	-0.290661	0.54806
AMEX60DD005785	0.802345	0.630064	0.926508	0.552132
AMEX60DD005786	0.802347	0.630063	0.0312672	0.982709
AMEX60DD005796	0.868843	0.486108	0.0312672	0.975549
AMEX60DD005798	0.0225248	0.912461	0.0490419	0.515918
AMEX60DD005800	-0.131088	0.91139	-0.553695	0.303093
AMEX60DD005802	0.240879	0.46465	0.0837346	0.709364
AMEX60DD005805	-0.0569238	0.555186	0.0886955	0.53776
AMEX60DD005807	1.4538	0.216312	-0.120736	0.855473
AMEX60DD005808	-0.131089	0.865017	-0.21666	0.658058
AMEX60DD005814	-0.0492958	0.591409	0.103223	0.0678461
AMEX60DD005817	0.736212	0.636605	0.353195	0.605772
AMEX60DD005821	0.0782464	0.468614	0.00638324	0.909045
AMEX60DD005822	-2.37556	0.584407	-2.18386	0.103947
AMEX60DD005823	0	1	2.47326	0.0864666
AMEX60DD005825	-0.0551409	0.8138	-0.177767	0.218512
AMEX60DD005826	1.73621	0.208767	-0.231767	0.790776
AMEX60DD005827	-0.159447	0.923748	-0.120736	0.796727
AMEX60DD005828	0.188564	0.0281658	0.0395999	0.71965
AMEX60DD005830	0.73621	0.636606	-0.290661	0.763922
AMEX60DD005831	0.0459786	0.692082	0.074336	0.282307
AMEX60DD005833	0.0288184	0.810522	0.242675	0.00133516
AMEX60DD005841	-0.0420063	0.711072	0.108646	0.115035
AMEX60DD005844	0.0744005	0.35486	0.0963132	0.311938
AMEX60DD005845	-0.159443	0.92375	1.35319	0.262253
AMEX60DD005846	0.802346	0.630064	-1.29066	0.284946
AMEX60DD005847	0.032196	0.80079	0.037761	0.632788
AMEX60DD005848	1.4538	0.216313	-0.578786	0.174068
AMEX60DD005850	-2.5735	0.0744533	-0.553695	0.552132
AMEX60DD005851	0.736211	0.636605	-0.161378	0.828885
AMEX60DD005852	0.515273	0.1809	-0.0580001	0.843139
AMEX60DD005854	0.453872	0.625991	2.03127	0.0291676
AMEX60DD005855	-0.131087	0.911391	0.223912	0.764266
AMEX60DD005856	0.197946	0.862511	-0.416192	0.46739
AMEX60DD005858	-0.0866955	0.808615	0.185595	0.462247
AMEX60DD005860	-0.13109	0.659588	-0.0341446	0.893337
AMEX60DD005865	-1.02681	0.509504	-0.29476	0.853217
AMEX60DD005867	0.802343	0.630065	-1.44689	0.315904
AMEX60DD005870	-0.00322471	0.966678	0.0548074	0.470502
AMEX60DD005878	0.0262152	0.930912	-0.176424	0.26504
AMEX60DD005879	-0.159447	0.923748	-0.483306	0.49664
AMEX60DD005883	-1.61171	0.26393	0.995105	0.550277
AMEX60DD005885	0.121316	0.0585208	0.0757781	0.313976
AMEX60DD005886	0.0209139	0.974831	0.16055	0.649112
AMEX60DD005887	0.146549	0.163124	-0.027347	0.794831
AMEX60DD005888	0.0388353	0.955821	0.698692	0.117772
AMEX60DD005891	-0.131154	0.927478	-1.19112	0.231523
AMEX60DD005892	3.01992	0.0245428	0.796802	0.165791
AMEX60DD005895	-0.616516	0.465503	0.571836	0.311549
AMEX60DD005896	-1.61171	0.263929	-1.44689	0.315904
AMEX60DD005897	1.32117	0.359787	-0.290661	0.763922
AMEX60DD005905	0.145074	0.251927	0.0408828	0.813121
AMEX60DD005912	-1.12124	0.500905	0.476742	0.810454
AMEX60DD005916	0.665898	0.678357	-0.614804	0.381925
AMEX60DD005917	-0.131153	0.927479	1.03127	0.409143
[truncated: 18,671 more rows]

## Sheet: S2.4 Core Enriched Genes
Supplemental Data Table 2.4: Core Enriched Genes from ChIP-Seq data (Fig 2)
LW->Mat			ND->LW
Gene	Top 20 GOBP Pathways	Increased or Decreased	Gene	Top 20 GOBP Pathways	Increased or Decreased
AHCY	10	Increased	FGF8	11	Increased
APOA4	8	Increased	SHH	11	Increased
CDC25A	4	Decreased	MSX1	10	Increased
TLR4	4	Decreased	ALDH1A2	9	Increased
AKT1	3	Decreased	NOG	8	Increased
ATF4	3	Decreased	TBX3	8	Increased
ATM	3	Decreased	ALX4	7	Increased
AURKA	3	Decreased	ASCL1	7	Increased
CALR	3	Decreased	NKX2-1	7	Increased
CASP2	3	Decreased	PITX1	7	Increased
DDIT3	3	Decreased	WNT3A	7	Increased
FGF8	3	Decreased	EN1	6	Increased
FZD9	3	Decreased	FEZF2	6	Increased
INS	3	Decreased	GBX2	6	Increased
IRF1	3	Decreased	GLI3	6	Increased
PHB2	3	Decreased	HOXA2	6	Increased
TNKS1BP1	3	Decreased	HOXD10	6	Increased
UBA52	3	Decreased	LEF1	6	Increased
VEGFA	3	Decreased	LHX3	6	Increased
ADIPOR1	2	Increased	ZBTB16	6	Increased
APOB	2	Increased	KNTC1	6	Decreased
ARG2	2	Increased	ZW10	6	Decreased
CHAC1	2	Increased	CRKL	5	Increased
GCAT	2	Increased	FOXG1	5	Increased
KMO	2	Increased	GATA3	5	Increased
KYNU	2	Increased	OTX1	5	Increased
NT5C1A	2	Increased	PITX2	5	Increased
OTC	2	Increased	SFRP2	5	Increased
ANKRD17	2	Decreased	SIX3	5	Increased
ANKRD31	2	Decreased	TBR1	5	Increased
ASCL1	2	Decreased	AURKB	5	Decreased
BECN1	2	Decreased	GEN1	5	Decreased
CCND1	2	Decreased	TRIP13	5	Decreased
CDC16	2	Decreased	ADORA1	4	Increased
CDC27	2	Decreased	ADRA2A	4	Increased
CDK10	2	Decreased	AREG	4	Increased
CNOT3	2	Decreased	EREG	4	Increased
CNOT6L	2	Decreased	FOXB1	4	Increased
CNOT7	2	Decreased	HAND2	4	Increased
CNOT8	2	Decreased	HOXA3	4	Increased
CRADD	2	Decreased	HOXD3	4	Increased
CRLF3	2	Decreased	NCF1	4	Increased
DBF4	2	Decreased	NRP2	4	Increased
DDRGK1	2	Decreased	OSR2	4	Increased
DDX3X	2	Decreased	RELN	4	Increased
DLGAP5	2	Decreased	SALL1	4	Increased
DLX5	2	Decreased	SEMA3C	4	Increased
DRD2	2	Decreased	SFRP1	4	Increased
DYRK3	2	Decreased	SIX2	4	Increased
E2F8	2	Decreased	SKI	4	Increased
EZH2	2	Decreased	SOX1	4	Increased
FAM83D	2	Decreased	TBX18	4	Increased
FEN1	2	Decreased	TBX20	4	Increased
FGFR2	2	Decreased	TBX6	4	Increased
FOXG1	2	Decreased	TWIST1	4	Increased
FOXO4	2	Decreased	WNT2	4	Increased
FTSJ3	2	Decreased	RNF183	4	Decreased
GPSM2	2	Decreased	ADCYAP1	3	Increased
GTSE1	2	Decreased	AURKA	3	Increased
HNRNPU	2	Decreased	AXIN2	3	Increased
HOXA13	2	Decreased	BARX1	3	Increased
INSM1	2	Decreased	BHLHE41	3	Increased
KIF20B	2	Decreased	BMP7	3	Increased
KLHL18	2	Decreased	CER1	3	Increased
KMT2E	2	Decreased	DLL4	3	Increased
LRP5	2	Decreased	DMRT3	3	Increased
MBTPS1	2	Decreased	DMRTA2	3	Increased
MSX1	2	Decreased	EMX2	3	Increased
MYOG	2	Decreased	ERBB4	3	Increased
NDC80	2	Decreased	FEZF1	3	Increased
NFKBIA	2	Decreased	FGFR2	3	Increased
NHP2	2	Decreased	FZD5	3	Increased
NSFL1C	2	Decreased	GATA5	3	Increased
NUMA1	2	Decreased	GATA6	3	Increased
PAGR1	2	Decreased	HES2	3	Increased
PBX1	2	Decreased	HES3	3	Increased
PKP4	2	Decreased	HEY2	3	Increased
PLK3	2	Decreased	HOXD13	3	Increased
RAB11A	2	Decreased	LBX1	3	Increased
RACGAP1	2	Decreased	LFNG	3	Increased
RAD21	2	Decreased	MSGN1	3	Increased
RANBP1	2	Decreased	NKX2-5	3	Increased
RBL2	2	Decreased	NKX3-1	3	Increased
RHNO1	2	Decreased	OTX2	3	Increased
ROCK2	2	Decreased	PBX3	3	Increased
RPL26	2	Decreased	PCGF2	3	Increased
RRP8	2	Decreased	PLD6	3	Increased
SFPQ	2	Decreased	RIPPLY2	3	Increased
SIX2	2	Decreased	TBX2	3	Increased
SMARCD3	2	Decreased	TGFA	3	Increased
SMPD3	2	Decreased	ADIPOR1	3	Decreased
SOX4	2	Decreased	HERPUD1	3	Decreased
SPAST	2	Decreased	RNFT1	3	Decreased
SRC	2	Decreased	TCAF2	3	Decreased
STXBP4	2	Decreased	AGTR2	2	Increased
SVIL	2	Decreased	ALKAL1	2	Increased
TBX3	2	Decreased	BCL2	2	Increased
TFAP2A	2	Decreased	DLX5	2	Increased
TFDP2	2	Decreased	EBF2	2	Increased
TGFA	2	Decreased	EPHA4	2	Increased
UBE2C	2	Decreased	ERRFI1	2	Increased
UBXN2B	2	Decreased	FOXD1	2	Increased
WIZ	2	Decreased	FYN	2	Increased
WNT10B	2	Decreased	GPRC5A	2	Increased
XBP1	2	Decreased	GPRC5B	2	Increased
XRCC3	2	Decreased	IFRD1	2	Increased
ZIC1	2	Decreased	INSM1	2	Increased
ZNF16	2	Decreased	IRX1	2	Increased
ABCA1	1	Increased	IRX2	2	Increased
AGRP	1	Increased	NEDD9	2	Increased
AGT	1	Increased	NOX4	2	Increased
AGTR1	1	Increased	NR2E1	2	Increased
AMDHD1	1	Increased	NR4A2	2	Increased
CCK	1	Increased	PDGFB	2	Increased
CCR7	1	Increased	PTCH2	2	Increased
CSPG4	1	Increased	PTF1A	2	Increased
CYBA	1	Increased	RAX	2	Increased
GGT5	1	Increased	SHOX2	2	Increased
HCRT	1	Increased	SOX4	2	Increased
HDC	1	Increased	TRA2B	2	Increased
IAPP	1	Increased	CDK5R1	2	Decreased
IL31RA	1	Increased	CIB1	2	Decreased
LIPC	1	Increased	DUSP1	2	Decreased
MT-CO2	1	Increased	HSPA5	2	Decreased
MTTP	1	Increased	PPP2R1A	2	Decreased
NMU	1	Increased	SOCS1	2	Decreased
NOS2	1	Increased	SOCS3	2	Decreased
NOS3	1	Increased	TMEM259	2	Decreased
NOXO1	1	Increased	APOA1	1	Increased
NR1H4	1	Increased	ARX	1	Increased
NUDT7	1	Increased	ATOH1	1	Increased
P2RY1	1	Increased	BAD	1	Increased
PLTP	1	Increased	BCL2L11	1	Increased
PRDX3	1	Increased	BMP6	1	Increased
PRLH	1	Increased	CASS4	1	Increased
SGK1	1	Increased	CHST11	1	Increased
TAC1	1	Increased	CRK	1	Increased
TCF15	1	Increased	CTSL	1	Increased
TRH	1	Increased	DCHS1	1	Increased
ABRA	1	Decreased	DHH	1	Increased
ACOD1	1	Decreased	ENG	1	Increased
ARHGDIB	1	Decreased	ENKUR	1	Increased
ARHGEF2	1	Decreased	EZH2	1	Increased
ATOH1	1	Decreased	FAIM2	1	Increased
ATP6V0A4	1	Decreased	FASLG	1	Increased
ATP6V0B	1	Decreased	FOXE1	1	Increased
ATP6V0E1	1	Decreased	FOXN1	1	Increased
ATP6V1F	1	Decreased	FOXP3	1	Increased
ATP6V1G3	1	Decreased	FZD4	1	Increased
BAD	1	Decreased	FZD7	1	Increased
BSG	1	Decreased	GAP43	1	Increased
CCNT2	1	Decreased	HHIP	1	Increased
CCNY	1	Decreased	HNF4A	1	Increased
CDK9	1	Decreased	IL12RB1	1	Increased
CER1	1	Decreased	LHX5	1	Increased
CKS1B	1	Decreased	MAP2K1	1	Increased
CKS2	1	Decreased	MFNG	1	Increased
CLTC	1	Decreased	MYOG	1	Increased
CSE1L	1	Decreased	NDNF	1	Increased
DDR1	1	Decreased	NEU3	1	Increased
DKC1	1	Decreased	NEUROD2	1	Increased
EIF2S1	1	Decreased	NHLH2	1	Increased
EIF6	1	Decreased	NKX2-2	1	Increased
ELAVL1	1	Decreased	NKX6-1	1	Increased
EPHB2	1	Decreased	NRP1	1	Increased
ERBIN	1	Decreased	OTP	1	Increased
ERLIN2	1	Decreased	PAK1	1	Increased
FAM53B	1	Decreased	PAX8	1	Increased
FOSL1	1	Decreased	PDE6H	1	Increased
FOXA1	1	Decreased	PDGFRA	1	Increased
FOXI1	1	Decreased	PHOX2A	1	Increased
FZD5	1	Decreased	PKD2	1	Increased
GAR1	1	Decreased	PRDM1	1	Increased
GEMIN4	1	Decreased	PRDM14	1	Increased
GEMIN5	1	Decreased	PROX1	1	Increased
GEMIN7	1	Decreased	RAP2B	1	Increased
GEMIN8	1	Decreased	RORA	1	Increased
GJA1	1	Decreased	SLC6A4	1	Increased
GSK3B	1	Decreased	SLIT2	1	Increased
HCFC1	1	Decreased	SOX5	1	Increased
HSP90B1	1	Decreased	SPRY2	1	Increased
HSPA5	1	Decreased	STC1	1	Increased
IGFBP1	1	Decreased	TGFB1I1	1	Increased
IPO13	1	Decreased	WNT11	1	Increased
IPO7	1	Decreased	ZBED6	1	Increased
IQGAP1	1	Decreased	ZFPM2	1	Increased
IRAK2	1	Decreased	ZMIZ1	1	Increased
IRAK4	1	Decreased	AGR2	1	Decreased
KPNB1	1	Decreased	ATXN3	1	Decreased
LIF	1	Decreased	BBS2	1	Decreased
LPCAT3	1	Decreased	CCT2	1	Decreased
MAP3K7	1	Decreased	CDCA5	1	Decreased
MDFIC	1	Decreased	CHCHD4	1	Decreased
MEIS2	1	Decreased	COPS5	1	Decreased
MRM2	1	Decreased	CTSA	1	Decreased
NF1	1	Decreased	DAP	1	Decreased
NIFK	1	Decreased	DTX3L	1	Decreased
NKX3-1	1	Decreased	ERN1	1	Decreased
NOD1	1	Decreased	FICD	1	Decreased
NOLC1	1	Decreased	HSPA14	1	Decreased
NOP10	1	Decreased	HSPD1	1	Decreased
NRARP	1	Decreased	IGFBP5	1	Decreased
NSA2	1	Decreased	MDM2	1	Decreased
NUP133	1	Decreased	NCK1	1	Decreased
NUP153	1	Decreased	NR1D1	1	Decreased
NUP155	1	Decreased	NR4A3	1	Decreased
NUP50	1	Decreased	PLSCR1	1	Decreased
NUP93	1	Decreased	POLDIP2	1	Decreased
NUP98	1	Decreased	RGS4	1	Decreased
OTX1	1	Decreased	RNF19B	1	Decreased
OTX2	1	Decreased	SDF2	1	Decreased
PAK3	1	Decreased	SDF2L1	1	Decreased
PES1	1	Decreased	SERPINE1	1	Decreased
PGAM5	1	Decreased	SLBP	1	Decreased
PGGT1B	1	Decreased	SLC1A1	1	Decreased
PLD6	1	Decreased	SNRPD3	1	Decreased
POU3F4	1	Decreased	SNRPF	1	Decreased
PPARD	1	Decreased	SNRPG	1	Decreased
PPP1R13B	1	Decreased	SYVN1	1	Decreased
PPP1R15B	1	Decreased	UPF1	1	Decreased
PPP3CA	1	Decreased	USP25	1	Decreased
PSRC1	1	Decreased
PTTG1IP	1	Decreased
RAB11FIP2	1	Decreased
RANBP17	1	Decreased
RANGRF	1	Decreased
RAP2B	1	Decreased
REP15	1	Decreased
RIPK1	1	Decreased
RIPPLY1	1	Decreased
RNF34	1	Decreased
RPL10A	1	Decreased
RPL29	1	Decreased
RPL7	1	Decreased
RPL7L1	1	Decreased
RPUSD1	1	Decreased
SELENOS	1	Decreased
SESN2	1	Decreased
SKI	1	Decreased
SLC15A4	1	Decreased
SLC25A5	1	Decreased
SLC46A2	1	Decreased
SLMAP	1	Decreased
SNRPD1	1	Decreased
SNRPF	1	Decreased
SNRPG	1	Decreased
SNU13	1	Decreased
SPRY2	1	Decreased
SREBF1	1	Decreased
TAB3	1	Decreased
TBX6	1	Decreased
TFAP2B	1	Decreased
TGFBR2	1	Decreased
THUMPD1	1	Decreased
TNPO1	1	Decreased
TNPO3	1	Decreased
TRMT112	1	Decreased
USP22	1	Decreased
WDR12	1	Decreased
WFS1	1	Decreased
WNT3A	1	Decreased
YTHDC2	1	Decreased
ZBED6	1	Decreased
ZBTB7B	1	Decreased
ZPR1	1	Decreased

## Sheet: S2.5 Search Terms
Supplemental Data Table 2.5: GO Terms for ENSEMBL Search
Limb Patterning	Cell Cycle	Immune&Stress
GO:0035136 - forelimb morphogenesis	GO:0007049 - cell cycle	GO:0006955 - immune response
GO:0035115 - embryonic forelimb morphogenesis	GO:0000278 - mitotic cell cycle	GO:0006959 - humoral immune response
GO:0030326 - embryonic limb morphogenesis	GO:0022402 - cell cycle process	GO:0002250 - adaptive immune response
GO:0035108 - limb morphogenesis	GO:0022403 - cell cycle phase	GO:0002384 - hepatic immune response
GO:0060174 - limb bud formation	GO:0022403 - cell cycle phase	GO:0002385 - mucosal immune response
GO:0009952 - anterior/posterior pattern specification	GO:0044770 - cell cycle phase transition	GO:0045087 - innate immune response
GO:0009953 - dorsal/ventral pattern formation	GO:1903047 - mitotic cell cycle process	GO:0016064 - immunoglobulin mediated immune response
GO:0009954 - proximal/distal pattern formation	GO:0000075 - cell cycle checkpoint signaling	GO:0090720 - primary adaptive immune response
GO:0035107 - appendage morphogenesis	GO:0098763 - mitotic cell cycle phase	GO:0050776 - regulation of immune response
GO:0060173 - limb development	GO:0051726 - regulation of cell cycle	GO:0002253 - activation of immune response
	GO:0044786 - cell cycle DNA replication	GO:0042116 - macrophage activation
	GO:0045786 - negative regulation of cell cycle	GO:0006974 - DNA damage response
	GO:0045787 - positive regulation of cell cycle	GO:0043247 - telomere maintenance in response to DNA damage
	GO:0010564 - regulation of cell cycle process	GO:0043516 - regulation of DNA damage response, signal transduction by p53 class mediator
	GO:0007346 - regulation of mitotic cell cycle	GO:0042770 - signal transduction in response to DNA damage
		GO:0000077 - DNA damage checkpoint signaling
		GO:0043555 - regulation of translation in response to stress
		GO:0006950 - response to stress
		GO:0033554 - cellular response to stress
		GO:0080134 - regulation of response to stress
		GO:0033555 - multicellular organismal response to stress

## Sheet: S2.6 Sig Limb Patterning Genes
Supplemental Data Table 2.6: Significant Limb Patterning Genes from ChIP-Seq data (Fig 2)
Gene Name	LW->Mat Log2FC	ND->LW Log2FC	Cluster
CHST11	0.0647989	0.133279	1
SHH	0.00822574	0.207761	1
EN1	0.108434	0.539732	1
SOX9	-1.06079	-0.43712	2
ACVR2A	-0.0130937	-0.0853073	2
IQCE	-0.00600366	-0.0484232	2
BMP1	-0.0168205	0.0500979	3
SEMA3C	-0.104091	0.103762	3
OSR2	-0.13109	0.165739	3
FGF8	-0.16731	0.340776	3
EMX2	-0.175484	0.342307	3
FOXG1	-0.453017	0.571836	3

## Sheet: S2.7 Sig Cell Cycle Genes
Supplemental Data Table 2.7: Significant Cell Cycle Genes from ChIP-Seq data (Fig 2)
Gene Name	LW->Mat Log2FC	ND->LW Log2FC	Cluster
FAM193B	0.392472	-0.730573	1
RPL30	0.045788	-0.63408	1
PLK2	0.0913028	-0.522331	1
YPEL3	0.277822	-0.287778	1
RNF126	0.0222997	-0.245298	1
STK19	0.0908189	-0.226193	1
MIER2	0.135085	-0.21282	1
MAP1S	0.0225317	-0.188258	1
SMARCD1	0.0263024	-0.183453	1
B9D2	0.146176	-0.172315	1
MAK16	0.157725	-0.16918	1
DBR1	0.106774	-0.167111	1
DSCC1	0.0201257	-0.163613	1
SPOPL	0.27591	-0.162905	1
SUPT7L	0.00144738	-0.156184	1
CELF5	0.0674558	-0.151686	1
USB1	0.0589354	-0.149778	1
ELP5	0.131366	-0.149004	1
RP9	0.0277873	-0.135843	1
POLR3C	0.0395209	-0.129386	1
COQ7	0.00867314	-0.125897	1
CDCA5	0.191324	-0.125804	1
MVB12A	0.0299236	-0.122384	1
CENPL	0.00655327	-0.118417	1
RD3	0.252591	-0.116688	1
POLR3D	0.0502201	-0.114566	1
TEX12	0.0898504	-0.113666	1
NHLRC1	0.063603	-0.108878	1
SMAD5	0.0853038	-0.108808	1
SDR16C5	0.147446	-0.108767	1
PTP4A1	0.116712	-0.105998	1
ROGDI	0.0323199	-0.102631	1
PPT1	0.057255	-0.0955133	1
JMJD7	0.0615552	-0.0927215	1
HSF5	0.0611062	-0.0921496	1
USP39	0.0236033	-0.0916835	1
BAP1	0.074943	-0.089295	1
COPS5	0.0764446	-0.0886759	1
PPP4R3B	0.00579831	-0.0882785	1
FMR1	0.0631178	-0.0832171	1
GEN1	0.00778894	-0.081982	1
PLSCR1	0.014761	-0.0804905	1
EIF1AD	0.0169814	-0.0792041	1
NOSTRIN	0.131981	-0.0771194	1
POLQ	0.0294636	-0.0759939	1
NUP54	0.00360542	-0.0748017	1
FGF13	0.105297	-0.0746709	1
ZNF704	1.32117	-0.0706617	1
SH3D19	0.00751525	-0.0705009	1
DBF4	0.00389468	-0.0693149	1
DDX23	0.0074569	-0.0684369	1
GPC6	0.224521	-0.0681767	1
DDX21	0.00319477	-0.0680613	1
CDYL	0.0273154	-0.0673348	1
ATXN3	0.453873	-0.0668104	1
SWAP70	0.0301047	-0.0648489	1
POLL	0.0952145	-0.0637695	1
LARP1B	0.0347608	-0.0628812	1
ZPBP	0.0061233	-0.0624001	1
PKN2	0.116689	-0.0613178	1
UBE4A	0.013428	-0.0612449	1
NHEJ1	0.00098328	-0.0606701	1
ZNF410	0.0211799	-0.0564363	1
CHD2	0.0632281	-0.0544172	1
SPATA22	0.0410941	-0.0542337	1
NELL1	0.0703366	-0.0539961	1
SLX4	0.0226149	-0.0535058	1
SFMBT1	0.0160144	-0.0529868	1
OSBPL3	0.0338361	-0.0519484	1
TRRAP	0.149693	-0.0498775	1
OTUD7A	0.0273701	-0.0460437	1
PTPN13	0.00473355	-0.0435349	1
STK39	0.0375777	-0.0433421	1
MCC	0.00286325	0.0518344	2
PFKM	0.021173	0.0599402	2
ERBB4	0.0143144	0.0670058	2
IL16	0.0221002	0.069594	2
FYN	0.106896	0.0813796	2
PRR7	0.0342387	0.081723	2
PDZD2	0.0475618	0.0861493	2
RRP8	0.0292745	0.0887155	2
ATN1	0.0476649	0.0905482	2
USPL1	0.0558991	0.0935582	2
LAMA5	0.0363634	0.0960833	2
SLC22A3	0.0446364	0.0990032	2
RGS17	0.0911334	0.106771	2
TGFB1I1	0.0932274	0.106777	2
NICN1	0.189743	0.107973	2
PGR	0.130953	0.11013	2
SIM1	0.0018954	0.113461	2
BTBD18	0.0316396	0.114835	2
LBX1	0.0646972	0.119739	2
ZNF740	0.10102	0.128808	2
MAPK12	0.00753416	0.129115	2
TBPL2	0.0311669	0.131046	2
MAD1L1	0.201788	0.132916	2
MYOZ1	0.160676	0.133061	2
VAX1	0.023968	0.144016	2
THAP1	0.0110088	0.155683	2
NR2E1	0.119485	0.170763	2
CRADD	0.075361	0.171624	2
AXIN2	0.205945	0.181715	2
HSPB7	0.0538278	0.18327	2
CSRP1	0.0724436	0.208063	2
GTF3A	0.113023	0.211406	2
NEUROD4	0.137172	0.21371	2
IRF7	0.309483	0.226024	2
TRIM63	0.0961438	0.314693	2
SIX2	0.0504916	0.354293	2
SPAG8	1.16788	0.446305	2
EN1	0.108434	0.539732	2
SOX14	0.109919	0.657452	2
XRCC4	1.0913	0.986902	2
NFIX	0.0572228	1.11873	2
KNTC1	-0.159445	-2.86193	2
IRX3	-0.243564	-0.448342	2
SOX9	-1.06079	-0.43712	3
DTX2	-0.0729869	-0.359523	3
LSM3	-0.290961	-0.219276	3
SNRK	-0.0329028	-0.196722	3
TRAPPC2L	-0.119863	-0.18475	3
RFXANK	-0.0408921	-0.175151	3
PSMB8	-0.754618	-0.174821	3
CENPW	-0.0465123	-0.162001	3
STK11	-1.45301	-0.159587	3
GLRX	-0.0513108	-0.149511	3
HDGFL3	-0.00321301	-0.14895	3
KCTD13	-0.161528	-0.147639	3
CEBPG	-0.0745063	-0.138392	3
ELL2	-0.149632	-0.131162	3
WDR82	-0.0272541	-0.130869	3
LSM4	-0.0469265	-0.124752	3
PRKRA	-0.0862178	-0.120505	3
JUP	-0.0576815	-0.118695	3
RCOR1	-0.0320669	-0.11806	3
QRICH1	-0.111997	-0.113119	3
NEIL3	-0.0881067	-0.112907	3
GHDC	-0.0344575	-0.10596	3
ALDH7A1	-0.00255657	-0.104702	3
CASC3	-0.0379805	-0.104616	3
FAM53A	-0.0909831	-0.10307	3
EFCAB6	-0.38711	-0.101277	3
SRFBP1	-0.0456104	-0.100448	3
DET1	-0.0133513	-0.0983455	3
THOC5	-0.0327661	-0.0962863	3
KAT2A	-0.0854071	-0.0962598	3
CPSF6	-0.0338365	-0.0958601	3
POLI	-0.0825707	-0.0943716	3
CSTF2	-0.0593972	-0.092874	3
TENT4A	-0.0500716	-0.0908451	3
BEND6	-0.079759	-0.0907034	3
ELK1	-0.036879	-0.0903474	3
SUDS3	-1.12124	-0.0896113	3
PWWP3A	-0.0275218	-0.0876087	3
NRDE2	-0.0563302	-0.0873035	3
DCUN1D1	-0.0131092	-0.0871875	3
SUN2	-0.0911678	-0.0864363	3
FAM172A	-0.0467435	-0.0851741	3
SHOC2	-0.039942	-0.0847817	3
SF3B1	-0.0686012	-0.0847543	3
TICRR	-0.142574	-0.0846969	3
HAX1	-0.10904	-0.0835638	3
IRAK2	-0.0557172	-0.0804822	3
KDM5C	-0.0142378	-0.0791894	3
ZBTB40	-0.0666932	-0.079009	3
FAM120A	-0.0522258	-0.0780999	3
CDIP1	-0.0359916	-0.0764083	3
CTR9	-0.000251487	-0.0748924	3
UPF1	-0.0898896	-0.0748373	3
PPP2R1A	-0.0626731	-0.0746887	3
DUSP16	-0.0178299	-0.0742591	3
DECR1	-0.0264134	-0.0739876	3
INTS7	-0.0291436	-0.0734302	3
BICRA	-0.00318744	-0.0723771	3
TDRD3	-0.00825795	-0.0714676	3
PATL1	-0.0612345	-0.0710761	3
CHD3	-0.0388496	-0.0707316	3
CRTC1	-0.00843568	-0.0681874	3
USP7	-0.0928418	-0.0676185	3
ESF1	-0.00635868	-0.0668763	3
PRKCD	-0.0228771	-0.0659912	3
CNOT3	-0.0124053	-0.0659182	3
ECD	-0.00745641	-0.0647271	3
OTUD4	-0.0212916	-0.0646373	3
UBN2	-0.0482643	-0.0641214	3
FAM169A	-0.0164627	-0.0631261	3
MMS22L	-0.0376509	-0.0621723	3
MARF1	-0.0260978	-0.0613682	3
MAPK8	-0.022662	-0.0610539	3
EVC2	-0.228353	-0.0608065	3
ZC3H3	-0.0500859	-0.0605548	3
CLCC1	-0.0417759	-0.0593414	3
TEX2	-0.0313975	-0.0592436	3
SRRM2	-0.147373	-0.05895	3
BRF1	-0.0550458	-0.0585385	3
NBN	-0.0172752	-0.0566283	3
ATE1	-0.0315543	-0.0563552	3
YEATS2	-0.051652	-0.0563517	3
THOC1	-0.0450797	-0.0557767	3
PHLPP2	-0.0294206	-0.055293	3
CENPC	-0.0921292	-0.0551111	3
CARF	-0.0671434	-0.053933	3
ATXN2L	-0.0362556	-0.0533796	3
TRIP4	-0.0326389	-0.0509444	3
AHCTF1	-0.0364287	-0.0505023	3
NUP188	-0.0317077	-0.0504264	3
RAD18	-0.0440083	-0.0502038	3
WAPL	-0.0635289	-0.0492737	3
ADAM10	-0.00279449	-0.0471498	3
PHF14	-0.0435063	-0.0466727	3
MYOF	-0.0853761	-0.0460298	3
ZMYND8	-0.0037905	-0.0447742	3
CUL4A	-0.0505428	-0.0437359	3
BBS7	-0.0248773	-0.0403026	3
MED13	-0.0555046	-0.0386041	3
MYCBP2	-0.0954984	-0.0308395	3
CHD5	-0.453018	0.0601201	4
CLIP2	-0.109294	0.0616997	4
PPP1R16B	-1.12124	0.0723667	4
DDX10	-0.0563348	0.0755416	4
RBM20	-0.0326504	0.0780888	4
TAF5L	-0.0643781	0.0889315	4
ATAD2	-0.0414527	0.0897066	4
TGM2	-0.0469148	0.0967448	4
NUDT6	-0.129735	0.0970062	4
IKZF3	-0.0559798	0.0997695	4
NIF3L1	-0.0130038	0.100234	4
RREB1	-0.0438689	0.100309	4
PSPC1	-0.0528849	0.114881	4
PRDM1	-0.0415454	0.115089	4
PPARGC1B	-0.197098	0.117936	4
HIF3A	-0.0200397	0.156217	4
HNRNPUL1	-0.1655	0.159928	4
OSR2	-0.13109	0.165739	4
MED21	-0.0342283	0.174604	4
NHLH2	-0.0891691	0.174873	4
SKOR1	-0.171422	0.187003	4
ZBTB2	-0.10489	0.198221	4
UBE2QL1	-0.0543327	0.20241	4
AICDA	-0.122373	0.209604	4
ANKRD1	-0.241514	0.303565	4
VGLL2	-0.0186151	0.310904	4
EMX2	-0.175484	0.342307	4
TRAF4	-0.0904479	0.404526	4
FOXG1	-0.453017	0.571836	4

## Sheet: S2.8 Sig Immune+Stress
Supplemental Data Table 2.8: Significant Immune&Stress Response Genes from ChIP-Seq data (Fig 2)
Gene Name	LW->Mat Log2FC	ND->LW Log2FC	Cluster
PLA2G3	0.199469	-0.203977	1
POLR3C	0.0395209	-0.129386	1
C2	0.107904	-0.124744	1
POLR3D	0.0502201	-0.114566	1
SLPI	0.0377189	-0.103382	1
PPP4R3B	0.00579831	-0.0882785	1
FMR1	0.0631178	-0.0832171	1
GEN1	0.00778894	-0.081982	1
POLQ	0.0294636	-0.0759939	1
DDX21	0.00319477	-0.0680613	1
POLL	0.0952145	-0.0637695	1
NHEJ1	0.00098328	-0.0606701	1
CHD2	0.0632281	-0.0544172	1
SLX4	0.0226149	-0.0535058	1
STK39	0.0375777	-0.0433421	1
NAIP	0.0662058	0.0582343	2
SUSD4	0.0480465	0.0675898	2
IL16	0.0221002	0.069594	2
FYN	0.106896	0.0813796	2
PRR7	0.0342387	0.081723	2
BMP6	0.0537443	0.0845469	2
TNFRSF1B	0.154477	0.0860739	2
WNK4	0.00655327	0.100108	2
AXL	0.0187039	0.101748	2
TGFBR3	0.0556275	0.10503	2
MAPK12	0.00753416	0.129115	2
STMP1	0.0306612	0.169772	2
CRADD	0.075361	0.171624	2
CTSK	0.193512	0.205339	2
IRF7	0.309483	0.226024	2
NCF1	0.50634	0.829633	2
XRCC4	1.0913	0.986902	2
MADCAM1	-0.0295518	-0.241941	3
STK11	-1.45301	-0.159587	3
CEBPG	-0.0745063	-0.138392	3
JAK3	-0.00978077	-0.13049	3
PRKRA	-0.0862178	-0.120505	3
NEIL3	-0.0881067	-0.112907	3
POLI	-0.0825707	-0.0943716	3
LCK	-0.00386109	-0.0881497	3
PWWP3A	-0.0275218	-0.0876087	3
NRDE2	-0.0563302	-0.0873035	3
TICRR	-0.142574	-0.0846969	3
FBXO9	-0.0826793	-0.0792661	3
ZBTB40	-0.0666932	-0.079009	3
INTS7	-0.0291436	-0.0734302	3
USP7	-0.0928418	-0.0676185	3
PRKCD	-0.0228771	-0.0659912	3
OTUD4	-0.0212916	-0.0646373	3
RPTOR	-0.0354721	-0.0643003	3
MMS22L	-0.0376509	-0.0621723	3
NBN	-0.0172752	-0.0566283	3
BOD1L1	-0.025801	-0.0565096	3
RAD18	-0.0440083	-0.0502038	3
CUL4A	-0.0505428	-0.0437359	3
ARHGEF2	-0.0645762	0.050693	4
DAB2IP	-0.0039781	0.0614311	4
SEMA3C	-0.104091	0.103762	4
PSPC1	-0.0528849	0.114881	4
PRDM1	-0.0415454	0.115089	4
TRAF4	-0.0904479	0.404526	4
