# Supplementary material for: Development of a model system to study the regulation of patterning competency in regenerating axolotl limbs
Source: Research Square preprint supplement (doi:10.21203/rs.3.rs-3576567/v1), 2023-12-07
Supplement: Supplementary file 2 [file 945236076c84f3816d092525.xlsx]

## Sheet: S1.1 Figure 2 Pheno
Supplemental Data Table 1.1: Figure 2 Morphological Phenotype Data
Figure 2b Donors: Anterior Lateral Wounds
Lateral Wound Treatment	Total surgeries performed	Grafts Rejected	Raw Numbers					Percentages
			No Element	Single Element	Multiple Symmetrical	Single Limb	2+ Limbs	No Element	Single Element	Multiple Symmetrical	Single Limb	2+ Limbs
DMSO	8	0	2	6	0	0	0	0.25	0.75	0	0	0
RA	8	0	4	4	0	0	0	0.5	0.25	0	0	0
Figure 2b Donors: CALM-A's
Days Post RA Injection	Total surgeries performed	Grafts Rejected	Raw Numbers					Percentages
			No Element	Single Element	Multiple Symmetrical	Single Limb	2+ Limbs	No Element	Single Element	Multiple Symmetrical	Single Limb	2+ Limbs
1-day	18	1	4	10	3	0	0	0.235294	0.588235	0.176471	0	0
3-days	18	1	3	6	4	4	0	0.176471	0.352941	0.235294	0.235294	0
7-days	18	4	1	0	3	9	1	0.0714286	0	0.214286	0.642857	0.0714286
Figure 2h: ND-P's
Manipulation	Total surgeries performed	Survived & Formed Blastema	Raw Numbers					Percentages
			No Elements	Single Element	Multiple Symmetrical	Single Limb	2+ Limbs	No Elements	Single Element	Multiple Symmetrical	Single Limb	2+ Limbs
Sham + RA	20	15	1	1	0	11	2	0.0666667	0.0666667	0	0.733333	0.133333
Sham + DMSO	20	20	7	13	0	0	0	0.35	0.65	0	0	0
Denerve. + RA	20	15	3	3	1	4	4	0.2	0.2	0.0666667	0.266667	0.266667
								Sham+RA vs. Denerve+RA (Single E+Mult Symm Combined for test
									P value and statistical significance
									Test	Chi-square
									Chi-square, df	44.08, 3
									P value	<0.0001
									P value summary	****
									One- or two-sided	NA
									Statistically significant (P < 0.05)?	Yes
									Data analyzed
									Number of rows	2
									Number of columns	4

## Sheet: S1.2 Figure 3 Pheno
Supplemental Data Table 1.2: Figure 3 Morphological Phenotype Data
Figure 3c: Growth Factor Bead Implants
Bead Implanted	Total surgeries performed	Retained Implant & Formed Blastema	Raw Numbers					Percentages
			No Elements	Single Element	Multiple Symmetrical	Single Limb	2+ Limbs	No Elements	Single Element	Multiple Symmetrical	Single Limb	2+ Limbs
PBS	20	20	20	0	0	0	0	1	0	0	0	0
FGF2+FGF8	28	23	23	0	0	0	0	1	0	0	0	0
BMP2+FGF8	28	24	20	2	0	1	1	0.833333	0.0833333	0	0.0416667	0.0416667
BMP2+FGF2+FGF8	28	27	20	2	1	1	3	0.740741	0.0740741	0.037037	0.037037	0.111111

## Sheet: S1.3 SF4 Pheno
Supplemental Data Table 1.3: Supplemental Figure 3 Morphological Phenotype Data
Supplemental Figure 3a-d: Regeneration Study
Ectopic Structure Amputated	Total surgeries performed	Formed Blastema	Raw Numbers					Percentages
			No Elements	Single Element	Multiple Symmetrical	Single Limb	2+ Limbs	No Elements	Single Element	Multiple Symmetrical	Single Limb	2+ Limbs
B2F8 Derived	4	4	2	0	0	2	0	0.5	0	0	0.5	0
B2FF Derived	6	6	1	0	0	5	0	0.166667	0	0	0.833333	0
Supplemental Figure 3e-g: Grafting Study Study
Tissue Grafted	Total surgeries performed	Retained Graft & Formed Blastema	Raw Numbers					Percentages
			No Elements	Single Element	Multiple Symmetrical	Single Limb	2+ Limbs	No Elements	Single Element	Multiple Symmetrical	Single Limb	2+ Limbs
PBS Derived	18	18	7	10	0	1	0	0.388889	0.555556	0	0.0555556	0
F2F8 Derived	26	25	11	11	3	0	0	0.44	0.44	0.12	0	0
B2F8 Derived	20	19	9	7	1	2	0	0.473684	0.368421	0.0526316	0.105263	0
B2FF Derived	24	24	11	7	5	1	0	0.458333	0.291667	0.208333	0.0416667	0
