# Supplementary material for: Development of a model system to study the regulation of patterning competency in regenerating axolotl limbs
Source: Research Square preprint supplement (doi:10.21203/rs.3.rs-3576567/v1), 2023-12-07
Supplement: Supplementary file 3 [file 98046e00cf7bb78ed6c5f48c.xlsx]

## Sheet: S4.1 Significant Loci
Supplmental Data Table 4.1: Gene Loci Significant in ALMvs LW
gene_names	Annot	ALM_log	ALM_p	SU_log	SU_p	LDN_log	LDN_p	DU_log	DU_p
DRP2.TSS +120884	-intron (DRP2|AMEX60DD201037765.1, intron 3 of 8)	2.50036	1.74e-05	1.50911	0.00816042	0.965047	0.121347	1.43189	0.0131889
SLC6A8.TSS +619		2.16457	1.75e-05	2.31721	1.58e-06	1.68948	0.00105867	1.87834	0.000124731
ZDHHC2.TSS +540112	-intron (ZDHHC2|AMEX60DD201045467.1, intron 5 of 12)	2.34859	2.24e-05	0.0091595	0.987042	0.364624	0.550021	0.264039	0.642075
HROB.TSS -150031	Intergenic	2.40934	2.35e-05	1.24869	0.0264711	1.40259	0.0181607	0.970088	0.089448
GNB3.TSS +124484	-intron (GNB3, intron 5 of 9)	2.53814	3.11e-05	1.1707	0.0521601	1.29341	0.044252	1.11934	0.0669475
MPDZ.TSS +208819		1.49621	3.35e-05	0.903412	0.00981575	0.713994	0.0581952	1.16574	0.000903542
MBIP.TSS -567021	Intergenic	3.0264	3.84e-05	1.79859	0.0135004	1.63329	0.0344613	1.37838	0.0625677
GSKIP.TSS +135645	Intergenic	3.97403	4.94e-05	2.10036	0.0321722	3.71184	0.000170592	2.77432	0.00453281
CAMKK1.TSS -38532	Intergenic	3.97264	5.51e-05	2.88458	0.0031468	2.03349	0.0497357	2.46961	0.0124031
ZNF683.TSS +120159	-intron (ZNF683, intron 4 of 15)	-1.81666	5.67e-05	-1.26037	0.000708868	-1.2062	0.0041376	-2.06083	3.16e-07
CYP4B1.TSS +229453		1.71329	6.26e-05	0.861355	0.0389772	1.38703	0.0015237	0.999229	0.0174416
MCF2L.TSS +34	-promoter-TSS (MCF2L|AMEX60DD301048283.20)	-2.63655	7.67e-05	-1.30765	0.00958193	0.0498087	0.923805	-1.49706	0.00400373
MOCS1.TSS -986000		-1.31157	7.87e-05	-0.84325	0.0061209	-1.2536	0.000187991	-0.682911	0.0272967
TEX15.TSS +277110		2.95625	8.23e-05	0.214848	0.778284	0.692505	0.391002	0.0614672	0.93689
MYCN.TSS -483	-promoter-TSS (MYCN|AMEX60DD102033177.2)	-1.38134	8.28e-05	-0.61682	0.0329665	-0.587029	0.0690932	-0.846711	0.00455845
TLE3.TSS -35010	Intergenic	-4.32475	8.39e-05	-2.9046	0.00142721	0.476712	0.594123	-1.62354	0.070845
POP5.TSS -184473	Intergenic	-1.7776	9.91e-05	-1.25659	0.00137862	-0.879445	0.0394527	-1.18815	0.00288241
CNNM3.TSS +39421	-intron (CNNM3|AMEX60DD201001236.2, intron 1 of 8)	3.07361	0.000114273	2.66669	0.000695392	2.54185	0.00168622	1.86579	0.0189861
ITGA9.TSS +84137	-intron (ITGA9|AMEX60DD201037986.2, intron 3 of 27)	1.70197	0.000120365	1.50596	0.00044777	1.2852	0.00459896	1.48174	0.000602398
EML1.TSS -15732	Intergenic	2.74321	0.000132564	1.49031	0.0357122	1.5355	0.0414884	1.53678	0.0317661
PARPI_0010972.TSS +22937	-intron (GIPC3|AMEX60DD301014349.1, intron 1 of 5)	2.1719	0.000136423	1.16361	0.0371318	0.741226	0.224967	0.905841	0.110912
PARD6A.TSS -30110	Intergenic	2.36405	0.000139635	0.929958	0.131159	1.51814	0.0180944	1.77143	0.00382557
CADM4.TSS -180868	Intergenic	1.41071	0.000142502	1.16847	0.00110337	1.23325	0.00107487	1.15557	0.00136528
IQSEC1.TSS -253339	Intergenic	-2.07116	0.000156486	-0.759438	0.109694	-0.177109	0.720504	-0.822337	0.0866352
AGRP.TSS +65049	-intron (AGRP|AMEX60DD201015604.1, intron 2 of 3)	-2.17856	0.000164698	-0.445984	0.326757	-2.87824	3.24e-06	-1.40845	0.00329687
THUMPD2.TSS -238936		-2.27165	0.000175676	-1.11284	0.0224719	-0.867807	0.103358	-0.975738	0.04789
PARPI_0003339.TSS +15935	-intron (CDH23.L, intron 4 of 8)	2.27734	0.000176863	1.16181	0.0533832	1.2361	0.0493602	1.60562	0.00762351
DSCAML1.TSS +83494	-intron (DSCAML1|AMEX60DD201053913.1, intron 2 of 31)	2.38513	0.000219273	0.746209	0.245734	0.173895	0.809592	0.944369	0.144637
ROHU_007131.TSS -52115	Intergenic	-1.48164	0.000222461	-0.760226	0.0309885	-0.474971	0.209176	-0.538868	0.12873
NUP133.TSS -4419	Intergenic	2.0912	0.000235009	0.889875	0.111941	0.521411	0.39689	0.258896	0.654668
ESRRB.TSS +80708	-intron (ESRRB, intron 1 of 6)	2.74198	0.000244038	1.43164	0.0532965	1.23165	0.120061	1.53025	0.0401497
CEL.TSS -1094	Intergenic	1.82861	0.000263602	1.15318	0.0177442	1.39304	0.00676733	1.21653	0.0131497
FCER1G.TSS +113771		3.00706	0.000279868	1.82989	0.0252159	1.95934	0.0225552	2.38177	0.00352774
PANX3.TSS +41018	-intron (PANX3|AMEX60DD301053476.1, intron 2 of 2)	1.9022	0.000281089	0.453608	0.384135	0.773978	0.153005	0.82824	0.112553
FKBP9.TSS +520	-exon (FKBP9|AMEX60DD301038019.1, exon 1 of 10)	-1.31069	0.000281828	-0.197298	0.550833	-0.770178	0.0302332	-0.32833	0.324856
CSMD2.TSS -245803	-intron (CSMD2|AMEX60DD201006008.1, intron 32 of 65)	-2.23833	0.000285484	-1.69097	0.00105419	-1.11855	0.0455461	-1.41205	0.00663376
ROBO2.TSS +315311	-exon (ROBO2, exon 16 of 55)	-2.74559	0.000298774	-1.5147	0.0162064	-0.875129	0.188294	-1.5111	0.0179533
VMD2.TSS -102776	Intergenic	1.42661	0.000312106	0.823748	0.0300691	0.714956	0.0835392	0.339236	0.386315
LYPA_23C020153.TSS -84224	Intergenic	1.77951	0.000327263	0.239788	0.625889	1.37555	0.00666473	0.219276	0.660253
COL5A2.S.TSS -71	#NAME?	-2.64147	0.000357671	-0.887236	0.139283	-0.742049	0.24786	-1.23616	0.0436155
AKAP7.TSS -103024	-intron (AKAP7|AMEX60DD101034650.5, intron 4 of 9)	1.42427	0.000362434	0.506792	0.194769	0.609193	0.144145	0.723519	0.0655532
CXXC4.TSS -2111426	Intergenic	2.41888	0.000363355	1.34561	0.0437394	0.89983	0.216024	1.42784	0.0337575
APBA2.TSS -35896	-intron (APBA2|AMEX60DD201003634.3, intron 4 of 13)	2.38596	0.0003637	0.155447	0.818008	1.09484	0.118746	0.410166	0.546
H355_008375.TSS -77157	Intergenic	-1.44194	0.000365173	-1.25397	0.000545561	-0.860383	0.0282378	-0.570881	0.113246
ADCY7.TSS -115627	-intron (ADCY7|AMEX60DD201015830.1, intron 4 of 28)	-2.39424	0.000378706	-1.65297	0.00222887	-1.60267	0.00895698	-1.31622	0.0154291
HDAC7.TSS -294843	Intergenic	-2.48726	0.000385663	-1.54823	0.00343107	0.308647	0.562403	-0.711701	0.170232
EIF5.TSS +60331	Intergenic	-1.27338	0.000388196	-1.92213	6.65e-09	-0.901844	0.0102896	-1.27164	0.00010522
MFNG.TSS -160	-promoter-TSS (MFNG|AMEX60DD102029347.1)	1.26813	0.000415092	1.40697	5.6e-05	1.13502	0.00181039	1.22665	0.000480608
ZBTB20.TSS +351693	-intron (ZBTB20|AMEX60DD201046990.1, intron 4 of 8)	1.51048	0.000421321	0.416217	0.319328	0.642768	0.153964	0.539835	0.201245
DIPK1B.TSS -383311	Intergenic	2.37841	0.00043395	0.564837	0.403406	0.880709	0.216746	0.768255	0.25828
NTNG2.L.TSS +215738	Intergenic	1.42593	0.000436436	1.26106	0.00118495	0.675429	0.111153	0.583435	0.143383
GRAMD1B.TSS +246735	Intergenic	2.52734	0.000448627	1.06002	0.139096	0.993041	0.189513	0.721128	0.320758
MSN.TSS +2457	-intron (MSN|AMEX60DD201037012.1, intron 1 of 12)	-2.72829	0.000450003	-0.569648	0.322712	0.289102	0.630091	-0.746054	0.203566
BATF.TSS -1580	-intron (FLVCR2|AMEX60DD301011157.11, intron 2 of 9)	-2.47555	0.000462895	-0.339961	0.473882	-0.219515	0.674996	-0.3222	0.504779
LDHD.L.TSS -132180	Intergenic	-3.37359	0.00046745	0.261208	0.690834	-0.13846	0.84383	-0.136386	0.837733
HOMER1.TSS -1393985	Intergenic	2.05124	0.000481799	1.2113	0.0346064	1.1141	0.0704526	1.23557	0.0328096
FTCD.TSS +16111	-intron (FTCD|AMEX60DD201055536.1, intron 1 of 13)	1.74751	0.000487978	0.643945	0.195416	0.674906	0.190816	0.791878	0.112506
IPCEF1.TSS +190	-intron (IPCEF1|AMEX60DD201034995.1, intron 10 of 11)	-2.3116	0.000490547	-0.705861	0.1585	-0.627812	0.255852	-0.565459	0.264016
NPR3.TSS -14154	Intergenic	1.75338	0.000514176	0.958999	0.0510179	1.70415	0.000840342	1.16005	0.0189261
PLPP4.TSS -1080498	Intergenic	2.30744	0.000525376	1.43936	0.0275443	1.93029	0.00445348	1.2279	0.0633882
VIL1.TSS +32197	-intron (VIL1|AMEX60DD201056279.1, intron 12 of 19)	1.63336	0.000571923	0.505151	0.28086	0.293996	0.557829	0.449818	0.341349
LFNG.TSS -59953	Intergenic	3.31773	0.000580867	3.199	0.000683167	3.12325	0.00128892	2.64654	0.00547618
ASZ78_005489.TSS -4529	Intergenic	2.03182	0.000582286	1.03164	0.0731645	1.31184	0.0315965	1.32334	0.0220593
TTLL11.TSS +87219	-intron (TTLL11|AMEX60DD201050599.1, intron 3 of 9)	-2.27034	0.000586713	-1.39014	0.0172572	-0.960669	0.119254	-2.15188	0.000376312
ZNF281.TSS -328259	-intron (LOC115481964, intron 16 of 21)	1.76208	0.000594809	1.29237	0.00895599	1.64321	0.001567	1.11751	0.0259036
PRDM13.TSS +766351	Intergenic	1.6286	0.000594931	0.429316	0.356333	0.501633	0.320792	0.770833	0.0987897
MERTK.TSS +132423	-intron (MERTK|AMEX60DD201035090.1, intron 4 of 18)	1.86362	0.000630225	0.199418	0.713585	0.249216	0.672626	0.884254	0.101922
CSMD2.TSS +62926	Intergenic	2.00697	0.000642479	0.861802	0.136879	0.898179	0.146929	1.02589	0.0784628
TENM4.TSS -473005	-intron (TENM4|AMEX60DD201049694.1, intron 5 of 33)	-1.91063	0.000648947	-1.37049	0.00261257	-0.250556	0.600083	-1.6475	0.000534156
ZP3.TSS +936	-intron (ZP3-HOMER3, intron 2 of 23)	1.25701	0.00065221	1.01587	0.00427635	1.11066	0.00303475	0.893215	0.0128947
DUI87_10335.TSS -181178	Intergenic	3.11726	0.000664211	2.67629	0.00278521	3.07848	0.000766344	2.91241	0.00116769
N/A.TSS -153017	Intergenic	1.89925	0.000666765	0.10156	0.85569	0.354977	0.557814	0.159462	0.778351
SNAP25.TSS -352531	Intergenic	1.67308	0.000673206	0.718833	0.134095	1.06744	0.0362206	1.07198	0.0258648
DR999_PMT00942.TSS +674579		3.31355	0.000683682	2.93108	0.00216624	2.45693	0.0140845	2.98725	0.00185924
PDE6B.TSS -116213		2.2904	0.000687394	0.253694	0.708279	-0.077667	0.917505	-0.269048	0.700256
NEDD4.TSS -323152	Intergenic	-1.30707	0.000694446	-1.20813	0.000316489	-0.329918	0.35496	-1.42904	3.99e-05
CCDC130.TSS -33530	Intergenic	2.56709	0.000720464	0.84588	0.264515	1.51011	0.0538073	0.204775	0.791695
DR999_PMT16383.TSS +78725		1.84825	0.000723899	0.875094	0.101044	0.860106	0.135637	0.792056	0.14365
MAP2.TSS -291793	Intergenic	1.31168	0.000725066	0.996749	0.00748421	0.700946	0.0822022	1.12497	0.00271042
FIS1.TSS +165206	Intergenic	1.28117	0.000726595	0.247327	0.508017	0.500354	0.202299	0.648884	0.0828533
SHANK2.TSS +409641	Intergenic	1.35161	0.000731162	1.39788	0.000244576	1.29553	0.00137824	1.67971	1.11e-05
ZSWIM6.TSS +540987	Intergenic	-2.20087	0.000746669	-1.02954	0.0601908	-0.79226	0.179236	-1.01155	0.068223
TTLL4.TSS -932087	Intergenic	-1.40613	0.000749284	-1.68208	1.02e-05	-1.21852	0.00336349	-1.08951	0.00407616
RNASEL.TSS -118316	Intergenic	1.71218	0.000749416	0.657877	0.185338	0.398245	0.466252	1.28351	0.00948914
CPNE8.TSS -451850	Intergenic	-1.84716	0.000757594	-1.65936	0.000961056	-1.66471	0.00244269	-1.55291	0.00221633
SMARCA2.TSS -423932	Intergenic	2.56782	0.00076494	1.81369	0.0152743	1.65977	0.0362685	1.31287	0.084724
SKOR2.TSS +33117	-intron (SKOR2|AMEX60DD201041708.1, intron 4 of 8)	-1.99229	0.000787152	-1.2327	0.017564	-0.843186	0.12823	-1.47968	0.00527058
NRXN2.TSS -229621	-intron (NRXN2|AMEX60DD201025259.1, intron 3 of 6)	2.16149	0.000797501	1.10405	0.0809705	0.961748	0.159063	0.808973	0.209727
NRXN2.TSS +296688	-intron (LOC100552752, intron 1 of 6)	1.86372	0.000802989	0.808978	0.139623	0.592885	0.314179	0.428777	0.441853
LGR6.TSS -94994	Intergenic	2.32753	0.000808942	1.50646	0.0264645	2.05841	0.00355619	0.889103	0.20231
L1CAM.TSS -135229		1.32732	0.000822505	0.853628	0.0246679	0.44434	0.289068	0.616246	0.111558
SYT16.TSS -134396	-intron (SYT16|AMEX60DD201011839.3, intron 1 of 7)	1.4999	0.000824785	1.45333	0.000696715	1.27639	0.00521731	1.13921	0.00882074
ROHU_037325.TSS +1243525	Intergenic	1.62968	0.000825872	0.672149	0.161926	0.81124	0.107226	0.780706	0.106108
HYI.TSS -1021968		-1.75206	0.000840906	-1.38831	0.00367051	-0.60873	0.22252	-0.956117	0.0456563
N/A.TSS +427247	-intron (SLIT1|AMEX60DD201052864.1, intron 5 of 38)	2.61167	0.000845334	0.428975	0.586131	0.845346	0.30971	0.856714	0.277368
GPR65.TSS +13023	-intron (GALC|AMEX60DD201011235.1, intron 1 of 14)	3.74416	0.000860218	0.705453	0.531612	1.90188	0.0938393	0.500696	0.658385
CORIN.TSS -95491		-2.50167	0.000865406	-1.11465	0.0573906	-1.59907	0.0181555	-0.605038	0.301658
DNAJC22.TSS -182878	Intergenic	-1.93083	0.00088182	-0.633822	0.190478	-1.40985	0.011169	-1.96595	0.000157764
TXPB_URIBO1.TSS -1631563	Intergenic	-2.04786	0.000903937	-2.17607	0.000125307	-1.41881	0.0182307	-0.973134	0.0807116
ZC3H12C.TSS +6400	-intron (ZC3H12C|AMEX60DD201049401.1, intron 1 of 5)	2.46047	0.000908595	1.76657	0.0145778	1.77453	0.0202599	1.42304	0.053028
DTWD1.TSS +754986	Intergenic	-2.27242	0.000933382	-1.56486	0.00664553	-1.13415	0.0699556	-1.1873	0.0400769
ARHGAP6.TSS +503783	Intergenic	1.36882	0.000938527	0.768126	0.055322	0.637161	0.140149	0.606727	0.135521
ALDH3A2.TSS -506868	Intergenic	1.30767	0.000954246	0.732013	0.054213	0.510706	0.219604	0.752995	0.0502754
EDNRA.TSS +405	-intron (EDNRA|AMEX60DD301045012.1, intron 1 of 7)	3.24598	0.000970528	-0.64682	0.517679	1.07091	0.2877	-0.591609	0.556844
ETV2.TSS -46344		2.36254	0.000974717	1.53189	0.0286763	1.18076	0.118393	1.76629	0.0120132
RAPH1.TSS -370313	Intergenic	2.16939	0.000991538	1.69638	0.00820954	1.21266	0.078337	1.6926	0.0088289
HAPLN4.TSS +230587	-intron (HAPLN4, intron 2 of 10)	1.72279	0.00100118	1.74312	0.000536881	1.44812	0.00669885	1.66104	0.00106465
HAX1.TSS +220311	-intron (HAX1|AMEX60DD102015065.4, intron 3 of 7)	-2.48473	0.00101046	-1.3033	0.0277228	-1.26286	0.0565211	-0.52671	0.36866
CTNND1.TSS +72531	-intron (CTNND1|AMEX60DD201007376.1, intron 1 of 19)	3.73873	0.00103854	1.90552	0.0946294	3.43737	0.00274305	2.21382	0.0525381
NWD1.TSS -91184	-intron (NWD1|AMEX60DD201014026.1, intron 4 of 16)	2.15413	0.00104367	0.736987	0.257591	-0.350688	0.641483	0.672719	0.307949
COL24A1.TSS -123	-promoter-TSS (COL24A1|AMEX60DD301019005.2)	-2.67455	0.00105263	-0.757026	0.217784	-0.0700942	0.913806	-0.241561	0.693823
ST6GAL1.TSS +288515	-intron (ST6GAL1, intron 13 of 20)	1.50767	0.00107787	0.512041	0.256239	0.712991	0.139137	0.764122	0.0918489
RTF2.TSS -109207	-intron (CASS4|AMEX60DD201027347.1, intron 2 of 7)	2.2034	0.00110707	-0.0683653	0.920002	-0.459911	0.53967	-0.653267	0.350984
OLFML2A.TSS +141836	-intron (OLFML2A|AMEX60DD201050542.1, intron 3 of 7)	1.67478	0.00112092	-0.00382175	0.994048	0.630823	0.244023	-0.0348979	0.946532
TMEM179.TSS +553	-exon (TMEM179|AMEX60DD201011076.1, exon 1 of 4)	1.17061	0.00112389	1.72944	6.23e-07	1.75021	9.5e-07	1.5583	7.92e-06
SMAD7.TSS +13679	-intron (SMAD7|AMEX60DD201041727.1, intron 2 of 3)	-2.4828	0.00115423	-1.62761	0.0102708	-1.77416	0.0132288	-1.31108	0.0397096
ENPP2.TSS +103065	-intron (ENPP2, intron 28 of 172)	-1.82252	0.00116675	-1.28123	0.00569844	-1.24229	0.0179007	-1.50467	0.00174595
CDK20.TSS +420167	Intergenic	-1.13809	0.00118088	-1.20844	0.000140069	-0.993031	0.00454749	-1.07557	0.000820404
BEGAIN.TSS +702120	Intergenic	-1.65204	0.00121898	-1.19024	0.00929514	-2.11379	7.96e-05	-0.917934	0.0460008
FAM171A2.TSS +9351	-intron (FAM171A2|AMEX60DD201009885.1, intron 1 of 8)	2.19252	0.00122072	1.71675	0.00881769	1.57053	0.0244742	1.23502	0.0652026
LIMD2.TSS +3288	-intron (LIMD2|AMEX60DD201009721.1, intron 1 of 4)	1.21874	0.00122797	0.930115	0.010882	0.721767	0.0630915	0.188683	0.613681
PTGER1.TSS -40461		1.44936	0.00122841	0.34128	0.438731	0.134548	0.77938	0.461095	0.299294
HDAC1.S.TSS -151911	-intron (LCK|AMEX60DD301006076.1, intron 9 of 12)	1.8948	0.0012291	0.52642	0.366758	0.56954	0.349221	0.666894	0.254724
ADCY7.TSS +85027	Intergenic	1.50677	0.00123238	0.665041	0.143396	0.962017	0.045794	0.428996	0.353627
PDE4A.TSS +49501		1.98742	0.0012367	1.71849	0.00420588	1.32424	0.0367246	0.975941	0.110142
NHS.TSS +35707	-intron (NHS|AMEX60DD201047964.1, intron 1 of 8)	2.72587	0.00123707	2.38675	0.00367269	2.36321	0.00588132	2.37792	0.0040288
RPL34.TSS -445715	Intergenic	1.65483	0.00123709	0.916688	0.0661546	0.243135	0.66035	0.800683	0.113014
DSEL.TSS -466017	Intergenic	1.99399	0.00124887	0.738232	0.225306	1.48495	0.0193774	1.23299	0.0427014
FUT8.TSS -139487	-intron (FUT8|AMEX60DD102012057.1, intron 3 of 11)	1.94753	0.00125025	0.81518	0.170878	1.40191	0.0235741	0.418385	0.490363
DR999_PMT02922.TSS -85567	-intron (AGRN|AMEX60DD201051219.1, intron 3 of 35)	1.99768	0.0012575	1.32022	0.0290626	1.03009	0.112307	1.40553	0.0209625
GSONMT00027580001.TSS +329271	Intergenic	2.38958	0.00127907	1.45276	0.0478109	1.39682	0.0680094	1.2989	0.0789654
CAMTA1.TSS +143907	-intron (CAMTA1, intron 8 of 33)	3.23433	0.00129928	2.08196	0.0369602	2.72911	0.00751699	1.88925	0.0603557
PABPC1L.TSS +27339	-intron (PABPC1L, intron 8 of 119)	-1.45827	0.00130719	-0.536497	0.167278	-0.828748	0.0558117	-0.800836	0.0439674
N321_11115.TSS +81808	Intergenic	-1.65507	0.00131977	-1.50143	0.00121628	-1.06118	0.0338438	-1.30019	0.00548691
HAND2.TSS +625973	Intergenic	-1.78498	0.00133347	-1.85803	0.000277339	-1.24366	0.0223899	-1.29066	0.0113336
B3GNT3.TSS +8679	-intron (B3GNT3|AMEX60DD201013845.1, intron 1 of 3)	-2.16723	0.00133491	-0.394845	0.408704	-0.586988	0.278154	-0.745175	0.133351
DPH6.TSS -124547	-intron (DPH6|AMEX60DD201012151.1, intron 5 of 14)	-2.06727	0.00133713	-0.210341	0.668462	-1.57845	0.00823879	-0.46725	0.352486
IGL@.TSS +466	-TTS (IGL@-HOMER2)	-1.84627	0.00134537	-1.26134	0.0132842	-0.551388	0.303659	-1.28502	0.0129002
SEMA3E.TSS -30427	-intron (SEMA3E|AMEX60DD102006238.2, intron 4 of 15)	1.78166	0.00134717	0.301308	0.585308	0.388225	0.50981	0.197385	0.724037
FAM110B.TSS -111810	Intergenic	-0.949081	0.00136338	-0.422618	0.103086	-0.311276	0.272735	-0.320827	0.22136
SYNJ1.L.TSS +37839	Intergenic	-1.33051	0.00137595	-0.98125	0.0102718	-0.72102	0.0765582	-0.724683	0.0592298
AQP9.TSS -46131	Intergenic	-1.79009	0.00140205	-0.552003	0.23008	-1.04803	0.0449554	-0.629859	0.178237
PARPI_0022303.TSS -765996	Intergenic	1.62032	0.00140748	0.864553	0.0781141	0.862415	0.103734	0.693418	0.165246
TLX1.TSS +110097	Intergenic	1.63273	0.00142284	0.191737	0.705531	-0.646062	0.264653	0.59735	0.239823
SLC38A1.TSS +499525	-intron (SLC38A1|AMEX60DD201008290.1, intron 7 of 15)	1.45202	0.00143195	0.639764	0.155623	1.00237	0.0301365	0.636545	0.159581
STARD13.TSS +5600	-intron (STARD13|AMEX60DD201049224.1, intron 1 of 14)	2.03487	0.00143462	1.08095	0.083931	1.86598	0.00395654	1.15286	0.0675592
TSPAN7.TSS -164920	Intergenic	-1.63477	0.00145383	-1.00435	0.0210665	-0.606763	0.199343	-1.00009	0.0240631
DCTPP1.TSS -631534	Intergenic	2.09061	0.00147511	0.567589	0.38429	1.24162	0.0702082	0.716538	0.276521
RNF223.TSS +6179	-exon (RNF223|AMEX60DD201051222.1, exon 2 of 2)	-1.83222	0.00148368	-2.12295	1.33e-05	0.241862	0.605377	-1.81052	0.000229883
IGDCC3.TSS +41128	-intron (IGDCC3|AMEX60DD201003424.1, intron 1 of 13)	1.41387	0.00148991	1.60062	0.000164562	1.23254	0.00649593	1.39336	0.00116886
NKAPD1.TSS +68048	Intergenic	2.04069	0.00149638	-0.562988	0.390576	0.56544	0.405921	-0.0530751	0.935395
PRICKLE2.S.TSS +3006	-intron (PRICKLE2.S, intron 2 of 14)	-1.07728	0.00151838	0.0405082	0.900477	-0.0599773	0.857146	-0.0686162	0.832908
ITGA9.TSS +286908	-intron (ITGA9|AMEX60DD201037986.2, intron 15 of 27)	1.91112	0.00151854	1.72434	0.00277929	1.94299	0.0013189	1.68799	0.00373454
SH3BP5.TSS +64822		1.81549	0.00151964	1.89374	0.000498061	2.25175	6.97e-05	1.60879	0.00354803
PST.TSS -1125	-intron (ST8SIA4|AMEX60DD201042660.3, intron 3 of 3)	1.72808	0.00152885	0.904289	0.0861349	0.806244	0.158889	1.32038	0.0122657
ORF2P.TSS +259851		1.54945	0.0015395	0.379492	0.426811	-0.156862	0.773359	0.989071	0.0371963
B3GNT3.TSS +17557	-intron (B3GNT3|AMEX60DD201013845.1, intron 2 of 3)	2.18259	0.00154681	2.24915	0.000676816	1.21092	0.0934795	1.79779	0.00743158
PSMD7.TSS -398571	Intergenic	2.75437	0.00155869	1.5345	0.074681	1.25269	0.175495	2.18627	0.0108835
AGBL5.TSS -80506	Intergenic	2.03486	0.00157229	0.951014	0.132167	1.98403	0.00228082	0.802024	0.21139
ZBTB44.TSS +1644937	Intergenic	1.9313	0.00157401	0.0534061	0.930514	-0.153322	0.821924	0.313526	0.610879
STMN3.TSS +10412	-intron (STMN3|AMEX60DD101027088.2, intron 1 of 4)	1.19092	0.00157543	0.155838	0.675057	0.407663	0.295221	0.159089	0.671057
ATP2C2.TSS +955	-exon (ATP2C2|AMEX60DD201017205.1, exon 1 of 27)	-2.3084	0.00157645	-1.06399	0.0851034	-0.000360501	0.999549	-0.765364	0.21739
TOX.TSS +3419	-intron (TOX|AMEX60DD102039777.2, intron 1 of 8)	-1.78037	0.00159524	-2.01018	0.000152854	-1.63912	0.00387388	-2.18377	5.41e-05
MINAR1.TSS -261139	Intergenic	1.71981	0.00160233	1.11039	0.0348749	1.68435	0.00220241	1.16706	0.0280466
D4764_11G0002650.TSS +4685	-exon (D4764_11G0002650, exon 1 of 2)	1.77522	0.00160254	0.435054	0.431988	0.749761	0.207361	0.348251	0.537894
CALB1.TSS -387188	Intergenic	-1.32933	0.0016056	-0.61514	0.114184	-0.862511	0.0384955	-0.783764	0.0464737
DHDH.TSS -83420		-2.16024	0.00161911	-0.86323	0.147885	-0.606167	0.335768	-0.948918	0.115672
RWDD1.TSS +362976	Intergenic	1.73889	0.0016562	1.20936	0.0232877	0.960216	0.0962071	0.840598	0.12252
LTBP2.TSS +48449	-intron (DR999_PMT04044, intron 7 of 80)	1.37185	0.00165661	1.15009	0.00622595	0.731781	0.106124	1.27188	0.00262476
SCRT2.TSS -77145	Intergenic	-2.40357	0.00167329	-1.03879	0.128824	-1.43956	0.0494795	-1.46555	0.0347184
TNMD.TSS -152340	-intron (TNMD|AMEX60DD101037674.1, intron 6 of 6)	-1.64734	0.00169941	-0.748348	0.0777936	-1.3945	0.00553652	-0.68571	0.111997
GPR162.TSS +70997	-intron (GPR162|AMEX60DD201026800.1, intron 1 of 4)	1.18906	0.00170265	0.303613	0.410232	0.064286	0.874012	0.025322	0.946396
ROHU_028354.TSS -78397	Intergenic	2.58755	0.00171679	1.74852	0.0316595	1.37499	0.110855	1.17389	0.155591
ARHGAP22.TSS +165319	-intron (ARHGAP22|AMEX60DD201052431.1, intron 1 of 9)	1.80312	0.00175493	0.698604	0.214239	0.486231	0.432267	0.979079	0.0832683
TRAF2.TSS -727	-promoter-TSS (TRAF2|AMEX60DD301050929.6)	-1.81039	0.00176619	-1.85394	0.000212642	-0.454287	0.380251	-1.29896	0.00901933
LHX3.TSS +10545	-intron (LHX3|AMEX60DD201050656.1, intron 1 of 5)	1.61329	0.00177145	0.514354	0.309933	0.293562	0.596055	0.340157	0.509027
CGPICR_014474.TSS -88346	Intergenic	2.53325	0.00180391	1.42902	0.0745688	1.36809	0.10758	1.87978	0.0190515
AK5.TSS +113052	-intron (AK5, intron 1 of 4)	1.87563	0.00180658	0.131553	0.826525	0.375751	0.559428	0.210361	0.728722
TARS1.TSS +748050	Intergenic	-1.11609	0.00186309	-0.981663	0.00333438	-0.91227	0.011168	-0.845696	0.0120823
C030002A05RIK.TSS -80564	Intergenic	1.90734	0.00187173	0.259954	0.670359	-0.162851	0.813089	1.10767	0.0668952
RNASEH2B.TSS -123669	Intergenic	1.22224	0.00188788	0.707263	0.0639704	0.673119	0.0976047	0.402537	0.29911
JPH3.TSS +264858	-intron (JPH3|AMEX60DD201017176.1, intron 1 of 5)	1.20579	0.00190055	0.980315	0.00898965	1.06277	0.00704337	1.0038	0.00788744
TNNT3.TSS +486	-intron (AMEX60DD301004521.13, intron 1 of 2)	2.12748	0.0019044	0.279914	0.683012	1.34011	0.0550427	0.294143	0.669908
MIP.TSS -11169	Intergenic	1.30213	0.0019059	0.915504	0.025738	1.39652	0.000931711	0.889856	0.0311294
FAM210A.TSS +59045	-intron (HSD17B3|AMEX60DD301043044.1, intron 4 of 11)	-1.42838	0.00191599	-0.797358	0.0390811	-0.647484	0.130279	-0.603723	0.122107
DR999_PMT15559.TSS +34993	-intron (DR999_PMT15559, intron 1 of 9)	-1.61076	0.00192496	-1.20624	0.00908213	-0.499692	0.306169	-0.780809	0.0916904
ANXA6.TSS +11106	-intron (ANXA6|AMEX60DD102030115.3, intron 1 of 24)	2.00714	0.00193139	0.903209	0.154921	0.69216	0.317645	1.0864	0.0892895
ALAS1.TSS -179522	Intergenic	1.80723	0.00195105	0.492056	0.392596	0.673364	0.276527	0.568914	0.32808
UNC5A.TSS -186634	Intergenic	-1.71128	0.00195879	-0.72362	0.117817	-1.36019	0.0109663	-0.997781	0.0356445
KANK2.TSS +42846		1.46301	0.00197449	1.44905	0.0017879	1.34672	0.00477922	1.57887	0.000685436
TBC1D1.TSS +143873		1.73694	0.00198214	0.58511	0.287785	1.43493	0.0123395	0.675383	0.224768
NFIB.TSS -3528		0.846473	0.00201467	1.40967	1.54e-07	1.23807	6.21e-06	1.21689	6.3e-06
CD151.TSS +28310	-intron (CD151|AMEX60DD201004423.1, intron 1 of 7)	-2.80602	0.00201595	-0.0745957	0.899417	-0.546695	0.412396	-0.287356	0.63383
ITGB3.TSS +11392	-intron (AB205_0011690, intron 1 of 2)	2.81215	0.00203573	1.62028	0.0724358	1.65322	0.0822058	1.75973	0.0523008
COL9A1.TSS -2658	-intron (AB205_0067700, intron 58 of 87)	0.973425	0.00203979	0.593816	0.055107	0.590124	0.0662612	0.107356	0.731643
NTNG2.L.TSS +143831	Intergenic	3.27074	0.00205259	0.47587	0.656122	2.08995	0.0521087	0.298297	0.781949
TLX3.TSS -45454	Intergenic	-1.0062	0.00206762	-0.898316	0.00329897	-1.02085	0.00206768	-0.55522	0.0701211
ETS1.TSS -33736	-intron (ETS1|AMEX60DD201053603.1, intron 3 of 9)	-2.18158	0.00209427	-0.692895	0.239936	-1.09035	0.0947017	-0.771124	0.196835
CIAO2B.TSS -65810	Intergenic	1.58609	0.0020964	-0.00218593	0.996598	-0.433618	0.45066	-0.203415	0.697404
MONAX_5E038562.TSS -204648	Intergenic	-2.05079	0.00214461	-0.762416	0.156367	-0.923927	0.12376	-1.22747	0.0276178
DMRT2.TSS +221419		-2.09754	0.00214838	-1.59642	0.00746554	-1.49986	0.0225614	-1.70086	0.0052287
GIPR.TSS +149753	-intron (GIPR|AMEX60DD201024897.1, intron 3 of 13)	1.52059	0.00215567	0.346876	0.478906	0.634864	0.21699	0.177207	0.720777
TRIM69.1.L.TSS +90	#NAME?	1.1215	0.00221715	0.713963	0.0431811	0.857194	0.0221591	0.601802	0.0922265
PRICKLE1.TSS +1864	-intron (PRICKLE1|AMEX60DD201006371.1, intron 1 of 7)	-1.36956	0.00221861	-0.116275	0.771118	0.431224	0.29763	-0.870115	0.0336484
CORIN.TSS -269692		-1.44091	0.00223215	-0.840839	0.0390448	-0.20967	0.628674	-0.697322	0.0904213
SPSB4.TSS +10709	-intron (SPSB4|AMEX60DD103002746.3, intron 1 of 2)	-1.46442	0.00223577	0.29383	0.491948	0.418334	0.345504	0.111165	0.796382
PCDH18.TSS -2462576	Intergenic	-1.41374	0.00224671	-1.05626	0.0133338	-0.92264	0.0431508	-1.13826	0.00844492
TTC14.TSS +171181	Intergenic	-1.30758	0.00224848	-1.40398	0.00013365	-0.653801	0.0994653	-0.810602	0.0258506
D4764_18G0012740.TSS -39889	-intron (VSTM2L|AMEX60DD201028693.1, intron 1 of 3)	1.05853	0.0022506	0.440544	0.19428	1.23704	0.000376127	0.5713	0.093854
SPATA22.TSS +152880	-intron (SPATA22|AMEX60DD301054740.1, intron 2 of 7)	-1.5959	0.00225803	-1.62933	0.000265149	-2.14155	8.88e-05	-1.20416	0.00703734
CTNNA1.TSS -337007	Intergenic	-1.7242	0.00227845	-1.13565	0.0159335	-1.64672	0.00304148	-0.669054	0.155346
FAM43B.TSS +59019	Intergenic	1.71453	0.00230911	0.667271	0.223399	0.686952	0.248581	0.592756	0.288065
KCNB1.TSS -213567	Intergenic	1.31753	0.00232302	0.0282549	0.946838	0.731064	0.103416	0.5325	0.207654
FBLN1.TSS -68094	-intron (FBLN1|AMEX60DD101006493.7, intron 1 of 14)	1.22528	0.00233267	0.444238	0.254864	0.604993	0.148441	0.680453	0.0828663
ZNF84.TSS +63832		-1.78892	0.00233959	-0.943146	0.0416082	-0.315097	0.528507	-0.128076	0.778624
RTBDN.TSS -298593		-1.32589	0.0023609	-0.999483	0.00865374	-0.741933	0.0757965	-0.526301	0.166616
DR999_PMT13595.TSS +78209		-1.99988	0.00236888	-1.01442	0.0784272	-0.744848	0.224665	-0.556648	0.334444
PCLO.TSS +550605	Intergenic	1.46554	0.00237443	0.807661	0.0847418	0.99447	0.0451731	0.736235	0.120275
EMP1.TSS +968	-intron (EMP1|AMEX60DD102029166.1, intron 2 of 5)	1.92174	0.0023855	0.0851726	0.893021	1.97485	0.0019379	0.244703	0.701763
CHRD.TSS +34413	-intron (CHRD|AMEX60DD201001527.1, intron 22 of 22)	1.45496	0.00238619	-0.118445	0.803234	0.254766	0.620194	0.104852	0.826872
IGX.TSS +145923	Intergenic	-1.9122	0.00238776	-1.1587	0.0426924	-0.636743	0.286199	-1.04446	0.0695946
UCN3.TSS -247121	Intergenic	-1.73296	0.00239258	-1.035	0.0355495	-0.28922	0.577778	-0.82271	0.0973649
SGSM2.TSS +79622	-intron (SGSM2|AMEX60DD201054050.1, intron 7 of 23)	-1.81577	0.00241701	-0.150212	0.760343	-0.908845	0.101578	-0.111018	0.8233
IKAROS.TSS +11918	-intron (IKAROS, intron 2 of 15)	1.27904	0.0024234	0.22712	0.583855	-0.155159	0.732333	0.294277	0.481521
RASIP1.S.TSS +438		1.02889	0.00242443	1.0711	0.000975225	0.91469	0.00794232	0.958589	0.00345258
PMP22.TSS +224	-exon (LOC106594511, exon 2 of 2)	1.71289	0.00242511	0.74115	0.179523	0.320744	0.598776	0.232072	0.682789
CAMTA1.TSS +158170	-intron (CAMTA1, intron 8 of 33)	1.64764	0.00243426	0.875701	0.0956913	1.05276	0.0613181	1.53969	0.00324385
AXL.TSS -72980	-intron (AXL|AMEX60DD301024484.1, intron 4 of 19)	-1.80915	0.00244808	-0.383238	0.423657	-0.855628	0.114936	-0.397732	0.413266
KIF6.TSS +33185		1.72175	0.0024555	0.67384	0.230285	1.11522	0.0554263	0.327567	0.564964
NDNF.TSS +6248	-intron (NDNF|AMEX60DD201044914.1, intron 1 of 3)	1.5725	0.00245559	-0.241953	0.641829	0.159653	0.777111	0.127589	0.806773
NR4A2.TSS +27806	Intergenic	1.33908	0.00245566	-0.0636534	0.883839	0.376607	0.421976	0.0798362	0.856283
RASA3.TSS -76045	-intron (RASA3|AMEX60DD201048258.1, intron 21 of 26)	1.93521	0.0024671	0.887946	0.158293	2.08542	0.00116092	0.439409	0.493728
CELF3.TSS +38359	-intron (CELF3|AMEX60DD201014951.1, intron 1 of 11)	1.94587	0.00252441	0.831912	0.191237	0.634169	0.350614	0.383278	0.55398
ACE.TSS -237220	Intergenic	1.88592	0.00253305	0.740698	0.229235	1.12096	0.0830448	0.698232	0.261974
KCNE2.TSS -192327	Intergenic	2.03198	0.00253362	1.29839	0.0468812	1.39647	0.0445744	1.63991	0.012281
PLXNB1.TSS +246607	-intron (PLXNB1|AMEX60DD301023198.1, intron 2 of 11)	2.14084	0.00255434	1.27574	0.0683745	1.77525	0.0138281	0.389475	0.586547
RTN4RL1.TSS +141337	-intron (RTN4RL1|AMEX60DD201054917.1, intron 1 of 1)	2.16553	0.0025683	1.84954	0.00749379	1.78468	0.0147435	2.07482	0.00281138
GLRA1.TSS -104353	Intergenic	1.93318	0.00260217	-0.0910127	0.887662	0.590137	0.378899	0.569103	0.375649
ITGB3.TSS -67985	-intron (ITGB3|AMEX60DD301009754.1, intron 12 of 14)	-2.06132	0.00260236	0.229179	0.663867	0.0148998	0.979192	0.585353	0.268114
HES5.TSS -8352	-intron (AMEX60DD301051346.1, intron 1 of 1)	-1.85006	0.00260672	-0.0739371	0.87609	-0.140718	0.786727	-0.32122	0.507729
PHLDB1.TSS -31270	-intron (PHLDB1|AMEX60DD201053877.14, intron 1 of 21)	2.60227	0.00261008	1.55968	0.0677418	1.77278	0.0467559	1.39684	0.105278
NRCAM.TSS +35075	-intron (AMEX60DD301006339.20, intron 2 of 3)	1.4646	0.00261572	0.520961	0.269082	0.563162	0.272615	0.104341	0.830567
CPNE9.TSS -29684	Intergenic	1.75351	0.00263753	-0.0609095	0.916858	0.0875788	0.89038	-0.106126	0.858089
RADIL.TSS -48313		1.63448	0.00265634	1.09322	0.0410213	1.3812	0.0122104	1.19362	0.026242
TOX2.TSS +58758	-intron (TOX2|AMEX60DD201028448.1, intron 1 of 8)	2.38218	0.00266109	1.44739	0.0629524	1.59737	0.0517465	1.17652	0.136555
NR5A1.TSS -81756	Intergenic	1.87625	0.00266977	-0.301819	0.632151	0.412751	0.534485	0.320368	0.609944
RNASEL.TSS -92976	Intergenic	1.34852	0.00268216	1.15058	0.00726515	1.18903	0.0092029	1.41188	0.00103448
DEUP1.TSS +1058	-intron (DEUP1|AMEX60DD103049580.11, intron 5 of 18)	-1.11998	0.00271566	-0.89961	0.00705913	-0.714552	0.0506714	-0.716439	0.0335677
TOR3A.TSS +349840		2.41202	0.00271902	0.713215	0.374548	0.071625	0.935161	0.696466	0.389942
MAPT.TSS +1678	-intron (LOC108802437, intron 1 of 20)	2.06968	0.00275152	0.809452	0.23541	1.51707	0.0328085	0.550126	0.428706
N/A.TSS -344346	Intergenic	2.20487	0.00278451	1.24454	0.0864591	0.93362	0.230166	0.548424	0.460704
SMARCA5.TSS -74094	Intergenic	2.4417	0.00279261	0.13577	0.869404	2.36315	0.00411832	0.0697081	0.933779
TBX2.TSS +313216	Intergenic	1.69278	0.00285859	-0.373772	0.513545	0.0227745	0.970553	-0.276172	0.633616
KCNC4.TSS +110839	Intergenic	2.64631	0.00286807	1.49049	0.09027	1.12315	0.229004	1.33413	0.132704
TMEM218.TSS +421616	Intergenic	1.72601	0.00287954	-0.178918	0.758272	0.508039	0.410115	0.415056	0.473284
PLAU.TSS +3371	-intron (PLAU|AMEX60DD201052157.1, intron 1 of 9)	-1.71564	0.00289155	-0.0942417	0.855994	0.842646	0.110525	-0.507922	0.333304
CIB84_013666.TSS -628774	Intergenic	-1.23711	0.00289315	-1.27782	0.000594992	-1.04174	0.0113621	-0.93075	0.0127634
VOPP1.TSS +339479	-intron (VOPP1|AMEX60DD201037908.1, intron 2 of 5)	-1.26107	0.0029033	-0.60825	0.0952822	-0.219133	0.577214	-0.246783	0.499902
TINAG.TSS +299300	-intron (TINAG|AMEX60DD301033470.1, intron 2 of 2)	-1.57566	0.00292846	-1.71078	0.000285718	-0.522691	0.288898	-0.959903	0.0392379
OSTF1.TSS +245777		1.31991	0.00292958	0.245671	0.569343	0.518016	0.266711	0.698375	0.10571
NCKIPSD.TSS -747212	Intergenic	1.31867	0.00293917	1.79392	1.78e-05	1.25104	0.00529926	1.69323	5.93e-05
ITGB3.TSS -63123	-intron (ITGB3|AMEX60DD301009754.1, intron 13 of 14)	1.5239	0.0029435	1.46601	0.00318488	1.11344	0.033839	1.45395	0.00363032
DPX16_17940.TSS +393523	Intergenic	-1.40512	0.00294713	-0.956486	0.0268209	-0.975352	0.0365854	-0.710756	0.101595
TNS3.TSS +63300	-intron (LOC112109441, intron 1 of 188)	2.17171	0.00296212	1.77038	0.0125456	0.30359	0.706188	1.57738	0.0278475
GABRA2.TSS +50886	-intron (FGF1, intron 32 of 55)	1.9557	0.00298495	1.27677	0.049152	1.62505	0.0150413	1.20886	0.0640806
MTOR.TSS +99141	-intron (MTOR|AMEX60DD301051133.1, intron 1 of 56)	1.02342	0.00298576	1.17918	0.000458216	0.799168	0.022218	0.914779	0.00688432
WDR27.TSS +546		-2.18782	0.0030071	-1.49323	0.0180232	-1.32846	0.0550254	-0.40701	0.512655
ZC4H2.TSS +566580	Intergenic	-1.88646	0.00301346	-1.3016	0.0187987	-1.82478	0.00416562	-0.778424	0.159386
EMP1.TSS -67035	-intron (EMP1|AMEX60DD102029166.1, intron 2 of 5)	2.71938	0.00302988	2.2101	0.0134486	3.02244	0.000957211	2.65386	0.00300619
PEAR1.TSS +89381	-intron (PEAR1|AMEX60DD201015692.1, intron 17 of 23)	1.74112	0.00303579	0.291325	0.615717	0.515807	0.412224	0.877033	0.128789
CCR7.TSS -54811	Intergenic	2.33679	0.00304148	2.62406	0.000499548	2.10687	0.00810402	2.44322	0.00131321
KCNH2.TSS -114478		1.85599	0.0030437	0.578103	0.348058	1.04103	0.111587	0.722136	0.245625
EHBP1.TSS -415982	Intergenic	-1.29406	0.00309441	-0.646811	0.0923351	-0.656907	0.118672	-0.317152	0.410963
MACF1.TSS -7607	Intergenic	1.35134	0.00311458	0.52991	0.234571	0.723835	0.126703	0.490535	0.276606
DBX1.TSS -7600	Intergenic	2.54798	0.00311746	1.13953	0.183724	0.992293	0.273945	0.617209	0.478954
CD36.TSS +9319	-intron (CD36|AMEX60DD201006223.1, intron 1 of 12)	1.65449	0.00315094	1.29494	0.0182229	2.01954	0.000310699	1.49543	0.00655332
SYTL5.TSS -125	-promoter-TSS (SYTL5|AMEX60DD102047671.1)	-1.7357	0.00318493	-1.7845	0.000489845	-0.0409571	0.937096	-1.68435	0.0012532
CA8.TSS +1192	-intron (CA8|AMEX60DD201039785.1, intron 1 of 8)	-0.907953	0.00319062	-0.352286	0.221921	-0.256784	0.3967	-0.443495	0.127398
GGN.TSS -391	-promoter-TSS (GGN|AMEX60DD301024426.3)	1.52928	0.00319635	0.890227	0.0744477	0.824994	0.127062	0.703815	0.166293
ARHGAP29.TSS +1629	-intron (ARHGAP29|AMEX60DD201018308.2, intron 1 of 19)	-2.27406	0.00319857	-0.260451	0.662079	0.0605814	0.923892	-0.273775	0.649883
EMX2.TSS +222434	Intergenic	-1.44574	0.00323553	-1.068	0.0211544	-0.932666	0.0552151	-1.11487	0.0169822
TMEM178A.TSS +63890		-1.05937	0.00324834	-0.859766	0.00793261	-0.925174	0.0100942	-0.599829	0.0657326
CARNS1.TSS -71373	-exon (CARNS1|AMEX60DD301007312.1, exon 5 of 10)	1.60706	0.00325064	0.730136	0.17022	-0.010839	0.985569	0.8959	0.0946667
KBTBD3.TSS +402742	Intergenic	-1.74613	0.00329774	-1.9064	0.000654602	-1.63941	0.00621202	-1.71938	0.00227271
TIAL1.TSS -174437	Intergenic	-1.91666	0.0033014	-0.97283	0.0872329	-0.399554	0.504444	-1.85109	0.00183909
MTSS2.TSS +15417	-intron (MTSS2|AMEX60DD201015533.1, intron 1 of 17)	1.78535	0.00332391	1.93593	0.000835754	1.10435	0.0802351	1.83412	0.00170899
ENPP2.TSS -281	-promoter-TSS (ENPP2|AMEX60DD301040394.10)	-0.853955	0.0033598	-0.078737	0.774573	-0.539427	0.0637447	-0.222238	0.422123
HIPK3.TSS -960957	Intergenic	-1.70965	0.00337017	-0.0499195	0.920165	-0.573835	0.290585	-0.655701	0.197968
ACO2.L.TSS -31499	Intergenic	1.72734	0.00340745	1.33359	0.019554	2.02111	0.00060845	1.1891	0.0394748
MAPRE1.TSS -268445	Intergenic	-1.811	0.0034347	-0.223694	0.694577	0.016531	0.977462	-0.574448	0.317132
NTN3.TSS +108937	-intron (NTN3, intron 2 of 11)	1.14517	0.00346289	1.23315	0.00110238	0.874911	0.0286065	0.563728	0.142399
KIAA1500.TSS +36614		-1.19822	0.00346548	-0.660231	0.0787469	-0.0732339	0.851841	-0.903074	0.0179463
THNSL2.TSS -5178		-1.08622	0.00352455	-1.21025	0.000413586	-1.08432	0.00398891	-1.29024	0.000222336
SLTM.TSS -7614	-intron (WDR70|AMEX60DD101041927.1, intron 12 of 16)	-1.7725	0.00355518	-0.522717	0.310337	-0.844167	0.137917	-0.836291	0.112035
NWD1.TSS -116278	Intergenic	1.93066	0.00355951	1.23665	0.0542656	1.09088	0.11498	1.01488	0.120327
RYR3.TSS +130303	-intron (RYR3.L, intron 239 of 298)	-1.57829	0.00360607	-0.625194	0.170237	-1.02718	0.0468606	-0.92868	0.047451
JPH3.TSS -48558	-intron (JPH3|AMEX60DD201017176.1, intron 4 of 5)	1.3015	0.00362047	-0.214172	0.628746	0.417728	0.375832	-0.297948	0.510231
OJAV_G00236990.TSS +1411272	Intergenic	1.51563	0.0036314	0.415832	0.421266	0.725559	0.173185	0.672023	0.194691
PHLDB1.TSS -12440	-intron (PHLDB1|AMEX60DD201053877.14, intron 4 of 21)	-1.89538	0.00363509	-0.562167	0.270027	-0.143167	0.794763	-1.06379	0.0453254
MDA_GLEAN10011711.TSS +881	#NAME?	-0.814337	0.00366083	0.043646	0.868386	0.547436	0.042933	-0.176073	0.507286
DZIP1L.TSS +1648	-intron (DZIP1L|AMEX60DD201002371.1, intron 1 of 3)	2.09304	0.00367701	-0.601397	0.412118	0.337824	0.658144	-0.163855	0.823338
SCN5A.TSS -305685	-intron (LOC115084076-HOMER2, intron 52 of 95)	2.23607	0.00368801	1.18062	0.119545	1.31	0.102316	0.827037	0.283796
MGC116527.TSS +2148	-intron (AMEX60DD301028187.3, intron 1 of 2)	1.73132	0.00369224	0.370066	0.529574	0.726609	0.248096	0.72802	0.217476
NRXN2.TSS +368607	-intron (LOC100552752, intron 2 of 6)	1.56042	0.00371357	0.536102	0.31337	0.853552	0.121841	0.558258	0.296685
CD82.S.TSS -1091257	Intergenic	-1.31388	0.00372238	-0.587821	0.138143	-0.404729	0.344787	-0.413338	0.300999
ARVCF.TSS +7974	-intron (ARVCF|AMEX60DD201000160.1, intron 1 of 15)	2.06724	0.00373622	0.865181	0.218927	1.03444	0.16589	0.545079	0.446873
DYSF.TSS +148		-2.50884	0.00374355	0.392203	0.492601	0.499694	0.416476	-0.425899	0.475096
PARPI_0006817.TSS +133567	-intron (PARPI_0006817-HOMER2, intron 9 of 11)	1.59506	0.00374866	1.63509	0.00211758	1.98761	0.000293861	1.71991	0.00128968
DR999_PMT16761.TSS -157126	Intergenic	-1.38249	0.00375803	-0.684255	0.0991913	-0.719991	0.114904	-0.513303	0.220139
KCNK9.TSS +44099		-1.41006	0.00378969	-1.38694	0.00163954	-0.499184	0.281891	-0.595607	0.172152
FAT1.TSS -623	-promoter-TSS (FAT1|AMEX60DD301045428.6)	-0.884357	0.00379446	-0.142499	0.62269	0.262665	0.377422	-0.185096	0.524986
TMEM132B.TSS -731803	Intergenic	-1.51061	0.0038085	-1.37201	0.00300885	-0.527173	0.282043	-0.751348	0.102288
VCAN.TSS +4925	-intron (LOC104371679, intron 2 of 29)	-1.16061	0.003815	0.115854	0.753962	-0.414458	0.290606	-0.135866	0.715505
ANKMY1.TSS +80300	-intron (ANKMY1|AMEX60DD201002110.3, intron 2 of 16)	2.12519	0.00382571	0.449164	0.539885	1.25729	0.0987767	1.12109	0.124562
GSONMT00027998001.TSS -566527		0.903431	0.00383537	0.578451	0.0566092	0.452102	0.158951	0.638587	0.0364251
TSHR.TSS -338824	Intergenic	1.44407	0.00383973	0.719238	0.135151	0.938487	0.0687974	0.961169	0.0471305
DR999_PMT08309.TSS -80988	Intergenic	2.07737	0.00387774	1.21385	0.0833631	1.06144	0.160655	1.32821	0.0601785
ST3GAL3.TSS +58321		1.76762	0.00387849	1.13514	0.0568466	1.50743	0.0156225	0.979611	0.104385
N/A.TSS -47529	Intergenic	2.07344	0.00388968	0.131753	0.854635	0.987661	0.179373	-0.0178536	0.980369
PARPI_0027863.TSS -97041	Intergenic	-1.62017	0.00389458	-0.947776	0.0587753	-1.02823	0.0596248	-0.702851	0.163288
CORO2B.TSS +224084	-intron (CORO2B|AMEX60DD201004229.2, intron 1 of 11)	-1.40113	0.00389479	-0.923906	0.0293905	-0.154888	0.729679	-0.543592	0.201214
XELAEV_18020378MG.TSS -401666	-intron (HS3ST5|AMEX60DD201035137.1, intron 5 of 6)	1.71709	0.00393318	0.812054	0.164697	0.887495	0.151933	0.528535	0.373029
VH6.65Y.TSS +894	#NAME?	-1.48629	0.00393948	-0.0721176	0.870999	-0.034665	0.94162	0.0101034	0.981984
UFSP2.TSS -3950	Intergenic	-1.43781	0.00394784	-1.06461	0.0196335	-0.792388	0.103516	-0.92558	0.0441348
IFFO1.TSS +15366	-intron (IFFO1|AMEX60DD201026861.1, intron 2 of 4)	1.92064	0.00395527	1.63525	0.0120661	1.30879	0.0559709	0.888782	0.179619
MDM1.TSS -90694	Intergenic	-1.29134	0.00396133	-0.962582	0.0161667	-1.4041	0.00207908	-0.996374	0.0143368
ITGAL.TSS -195	#NAME?	-1.24415	0.00397367	-0.821209	0.0396131	-0.791392	0.0638551	-0.858398	0.0333028
ATP6AP1L.TSS +137339	-intron (ATP6AP1L|AMEX60DD201042494.1, intron 3 of 6)	-1.91462	0.00398301	-1.4087	0.0166497	-0.654205	0.290823	-1.38014	0.0206436
GAL3ST4.TSS +24928	-intron (AMEX60DD301013147.1, intron 1 of 1)	2.27137	0.00398462	0.86813	0.26806	0.983714	0.233126	0.687533	0.385732
WDHD1.TSS +39947	Intergenic	1.66422	0.00399218	0.0979948	0.864667	0.190697	0.757829	0.173512	0.764993
KALRN.TSS +123498	-intron (KALRN|AMEX60DD201056078.10, intron 1 of 58)	1.64712	0.00399232	1.34204	0.0142751	0.678038	0.261968	1.11675	0.0447408
WNT11.TSS +730490	Intergenic	1.78758	0.00400576	1.05337	0.0807862	1.1774	0.0670333	1.17585	0.0530599
JPH3.TSS -97691	-intron (JPH3|AMEX60DD201017176.1, intron 4 of 5)	1.90927	0.00402993	0.145941	0.825849	0.783373	0.260826	0.171371	0.798433
GM29975.TSS -155693	Intergenic	0.883512	0.00403576	1.17067	8.79e-05	1.37662	6.92e-06	1.08683	0.000289782
STAC2.TSS +26366	-intron (STAC2|AMEX60DD201010286.1, intron 1 of 10)	0.820589	0.00405618	1.50212	5.47e-08	1.31426	3.83e-06	0.940067	0.000739315
OAZ3.TSS +203721	-intron (OAZ3, intron 3 of 4)	-1.50334	0.00405828	-2.28778	2.98e-06	-0.860976	0.088867	-2.12392	1.96e-05
CFAP299.TSS -15831		1.86359	0.00409249	0.994835	0.11594	0.579825	0.404254	1.02076	0.110405
INS.TSS +42157	Intergenic	1.02557	0.0040968	0.534465	0.116303	0.954025	0.00833436	0.879452	0.00998485
I79_020134.TSS -361075	Intergenic	1.58177	0.00410851	-0.208602	0.705466	0.384043	0.515805	0.721557	0.182971
MRC2.TSS -184452	Intergenic	2.04209	0.00412364	1.01133	0.14935	1.08168	0.144799	1.38737	0.0483036
YAP1.TSS -184214	Intergenic	1.65705	0.00413463	0.297533	0.600768	-0.0801197	0.900782	0.924134	0.10163
EOD39_15437.TSS +77711		1.53443	0.00414255	0.555385	0.2913	0.730445	0.188638	0.442167	0.406036
L1TD1-LIKE.TSS -383481	Intergenic	-1.44057	0.00414583	-1.48678	0.000931541	-1.65104	0.00132846	-1.22136	0.00698304
SERPINE1.TSS -164815	Intergenic	2.2789	0.00415439	2.58292	0.000672505	2.25378	0.00473344	2.13009	0.0056631
SYTL1.TSS +1130	-intron (SYTL1|AMEX60DD201005612.1, intron 1 of 15)	1.08351	0.0041727	0.58417	0.110144	1.36157	0.000319867	0.873008	0.0173512
ESRRGR.L.TSS +123022	-intron (ESRRGR.L, intron 11 of 15)	-1.46487	0.00419034	-0.836387	0.0657481	-0.561145	0.249486	-0.933545	0.0431798
TPP1.TSS +61834	Intergenic	1.7199	0.00420575	0.605357	0.304512	0.0410629	0.950388	0.76439	0.198204
MAP1LC3C.TSS -330090	Intergenic	1.2746	0.00422514	0.548701	0.204137	0.360713	0.443135	0.285967	0.516004
JAG2.TSS +496048	Intergenic	-1.55352	0.00424386	-0.398926	0.424739	-0.227829	0.660929	-0.367959	0.463961
CRB3.TSS -144213		2.22701	0.00424416	2.36701	0.00178595	1.99192	0.0117286	1.48385	0.0538458
SLC25A12.TSS +329153	Intergenic	1.43422	0.00424966	0.485251	0.318792	1.0174	0.048534	0.353002	0.477068
PODXL2.TSS -59147	Intergenic	1.70189	0.00425316	0.10783	0.855897	0.839452	0.167828	0.0348059	0.953597
KLHL32.TSS +95551	-intron (KLHL32|AMEX60DD201033889.1, intron 1 of 2)	2.02381	0.00426202	0.205781	0.77136	-0.133969	0.861477	-0.143351	0.842251
C1QTNF5.TSS +931	-intron (C1QTNF5|AMEX60DD201053838.1, intron 1 of 3)	1.74999	0.00428007	0.618538	0.307614	0.957286	0.128953	1.18324	0.0507815
COX2.TSS -278617		1.73664	0.00430927	-0.0368514	0.951677	0.501317	0.439675	0.304572	0.617771
DGCR8.TSS -287397	-intron (TANGO2|AMEX60DD102000163.4, intron 7 of 10)	1.5718	0.00431355	0.511886	0.34506	0.410353	0.480327	0.389871	0.477339
OTUD5.TSS -194344		1.46167	0.0043343	1.325	0.00651898	1.07431	0.0409469	2.09275	1.57e-05
TBC1D10C.TSS -14408	-intron (TBC1D10C|AMEX60DD201007311.1, intron 3 of 9)	1.73621	0.00435451	0.236282	0.695283	1.15301	0.0670366	0.814923	0.175097
PPP1R14A.TSS +71145	-intron (PPP1R14A|AMEX60DD201024639.1, intron 1 of 3)	1.34529	0.00435472	0.139549	0.765477	0.611555	0.20612	0.327077	0.486133
MACROD1.TSS -124277	Intergenic	-1.37893	0.00435752	-0.847628	0.0494439	-0.737532	0.115014	-0.931741	0.0335262
SDK2.TSS +67585		-1.57918	0.00436272	-1.29283	0.0070182	-1.42701	0.00904843	-1.59827	0.00132442
MAPK4.TSS +484759	-intron (MAPK4|AMEX60DD201041755.1, intron 3 of 6)	-1.43376	0.00437006	-1.09801	0.0160224	-1.61714	0.00172127	-0.980519	0.0331467
EOD39_7363.TSS +65420	-intron (EOD39_7363, intron 77 of 119)	1.88252	0.00438356	0.210845	0.748805	1.63702	0.0148856	1.20213	0.0645073
ARHGAP29.TSS -229638	Intergenic	1.52725	0.00439536	1.02356	0.0494257	0.574276	0.308505	1.17685	0.0246243
EBF4.TSS +304335		1.6842	0.00440626	1.0508	0.066985	1.00333	0.102567	0.989017	0.0882866
TTBK1.TSS +440517		0.906925	0.00441854	0.509645	0.101132	0.594248	0.0673016	0.275054	0.380972
SHD.TSS +14216	-intron (SHD, intron 1 of 5)	-1.2174	0.0044335	-1.17571	0.0014039	-0.364557	0.355054	-0.958835	0.0100793
C3H2ORF73.TSS +382004	Intergenic	1.60956	0.00445605	-0.324344	0.567607	-0.693047	0.271235	-0.417794	0.468182
NAV1.TSS +15285	-intron (NAV1|AMEX60DD201008617.1, intron 1 of 24)	1.65148	0.00449906	1.22401	0.0279495	1.4527	0.013811	1.89029	0.000653702
MAGI2.TSS -81369	-intron (MAGI2.S, intron 7 of 16)	-1.81287	0.00451978	-1.54747	0.0062914	-0.881775	0.144113	-1.18945	0.0363952
F2RL2.TSS -276067	-intron (IQGAP2|AMEX60DD301042353.1, intron 27 of 37)	2.2413	0.00452815	1.23093	0.113228	1.5864	0.0510174	1.0914	0.165052
THDL20.L.TSS +68692	-intron (THDL20.L-HOMER2, intron 12 of 79)	2.28581	0.00454151	2.3546	0.00228324	2.16321	0.00764625	2.08591	0.00755514
NRN1L.TSS +2789	-intron (NRN1L|AMEX60DD201015577.1, intron 1 of 3)	0.524355	0.00455165	0.773293	1.33e-05	0.66658	0.000335524	0.606465	0.000701105
MRE11.L.TSS +252840	Intergenic	3.00638	0.00455993	1.65062	0.117795	1.378	0.211529	1.39107	0.190858
RAB37.TSS +31678	-intron (RAB37|AMEX60DD201030953.3, intron 1 of 8)	0.662826	0.00459757	0.649174	0.00367534	0.785735	0.000842407	0.670099	0.00292093
CD151.TSS +35253	-intron (CD151|AMEX60DD201004423.1, intron 1 of 7)	-1.75602	0.00462847	0.469413	0.316188	-0.403354	0.44931	0.637057	0.176702
GSONMT00062069001.TSS -47703	Intergenic	1.40768	0.0046301	-0.19683	0.690587	0.218767	0.678478	0.364951	0.459477
EPHA3.TSS -248653	-intron (EPHA3|AMEX60DD201048317.1, intron 3 of 16)	1.58879	0.00463332	0.649642	0.234316	1.45498	0.0105945	1.11347	0.0414929
C2H18ORF21.TSS -147032	Intergenic	1.74416	0.00463488	0.552993	0.361571	0.745056	0.250691	0.500065	0.415658
LLAP_9351.TSS -43166	Intergenic	-1.61737	0.00464884	-0.410018	0.403782	-0.285102	0.587798	-0.571447	0.251769
SLITRK1.TSS +1035832	Intergenic	1.90691	0.00467528	1.30969	0.0437272	1.65662	0.0153518	1.87013	0.00388953
SST.TSS -150867	Intergenic	1.78534	0.00467949	0.957923	0.12142	0.994783	0.12928	1.16345	0.0611291
PARPI_0009050.TSS +372572	Intergenic	2.25478	0.00469133	0.834358	0.292708	1.03334	0.212914	0.783731	0.326865
NRXN3.TSS -1403424	Intergenic	1.78051	0.00472081	1.53794	0.0114407	0.783897	0.238174	1.69147	0.00564536
D4764_18G0012740.TSS -300158	-intron (VSTM2L|AMEX60DD201028693.1, intron 1 of 3)	1.23101	0.00472641	0.100478	0.812985	0.98741	0.0264189	0.777569	0.0652153
SAMD11.TSS +20296	-intron (SAMD11|AMEX60DD103051197.7, intron 2 of 13)	1.77866	0.00472752	1.35445	0.0266698	1.04115	0.111593	1.23565	0.0452908
JPH3.TSS +308795	-intron (JPH3|AMEX60DD201017176.1, intron 1 of 5)	1.36751	0.00475191	1.31914	0.00396946	1.75903	0.000244413	1.38567	0.00269485
SLC4A11.TSS -142372		-1.3999	0.00476472	-0.812563	0.0515608	-0.0188299	0.966117	-0.320749	0.441543
PLAT.TSS +41607	-intron (PLAT|AMEX60DD201002881.1, intron 6 of 13)	-1.18378	0.00479949	-0.0301552	0.934776	0.284347	0.464149	0.305386	0.40847
NEWT.TSS +298271	Intergenic	2.277	0.00481657	0.971599	0.224412	0.0975956	0.913179	1.04795	0.193482
AB205_0067090.TSS -3317	-intron (CP-VSP-HOMER2, intron 2 of 23)	1.78323	0.00481808	0.957366	0.118548	2.15353	0.00061077	1.04532	0.0915063
FHOD1.L.TSS +2134	-intron (FHOD1, intron 1 of 12)	-1.2531	0.00483754	0.258428	0.52012	0.170804	0.684538	0.262995	0.515056
SPNS3.TSS +219656	-intron (SPNS3|AMEX60DD201054161.1, intron 7 of 11)	-1.3256	0.00487306	-0.936492	0.0260609	-1.09246	0.0194263	-0.849168	0.0460646
CFTR.TSS +104978	-intron (CFTR, intron 4 of 8)	-1.63698	0.00490481	-0.689491	0.188173	-0.240028	0.661052	-0.601921	0.253899
SEMA5B.TSS +83030	-intron (SEMA5B|AMEX60DD201056098.1, intron 1 of 22)	1.82522	0.00493374	1.4379	0.0221892	0.654095	0.343407	1.01813	0.111377
ROHU_003591.TSS -229366	Intergenic	1.2627	0.00495718	0.226754	0.609816	0.42223	0.3621	0.312796	0.483717
THRA.TSS -95062	Intergenic	1.72787	0.00496373	-0.474002	0.447042	0.00290512	0.996554	0.0690619	0.911504
ITGA11.TSS +8534	-intron (ITGA11, intron 28 of 59)	-1.51874	0.00497129	-0.980445	0.0455675	-0.864153	0.100615	-0.887404	0.0728054
ARF6.TSS -93571	Intergenic	-1.75317	0.00498271	-2.10971	0.000226313	-1.56186	0.0120491	-1.47068	0.00962501
DDHD2.TSS -145959	Intergenic	0.999251	0.00500979	0.565207	0.0989555	0.50348	0.171715	0.673304	0.0510926
MONAX_5E008691.TSS +598437	Intergenic	1.67059	0.00501309	0.187952	0.74985	0.0906602	0.88924	0.863759	0.140421
TUBB3.TSS +1790	-intron (LOC115060730, intron 1 of 4)	0.882737	0.00501459	1.3237	1.64e-05	1.25851	6.26e-05	1.28748	2.92e-05
PDYN.TSS -202617	Intergenic	-1.6712	0.00501738	0.145772	0.752413	-0.40951	0.432011	-0.231695	0.625232
ANGPTL6.TSS +43192		0.998364	0.0050254	-0.00834225	0.980758	0.183171	0.625603	-0.244691	0.490076
CCND1.TSS -609760	Intergenic	1.31013	0.00503413	0.48564	0.281316	0.764945	0.113928	0.782323	0.0840657
FIGNL2.TSS +23448	-intron (FIGNL2, intron 1 of 4)	1.04012	0.00503537	0.876748	0.0138039	1.00317	0.00753564	0.761863	0.0342132
EFNA2.L.TSS +23450	-intron (EFNA2.L, intron 1 of 2)	1.93444	0.00506226	0.431001	0.529635	0.0644518	0.931755	0.381911	0.582056
ROBO2.TSS -266932	Intergenic	1.85979	0.00506551	1.57322	0.0130386	2.1182	0.0013017	1.19534	0.0647401
PCP4.TSS -455028	Intergenic	-1.23534	0.00506572	-1.06242	0.00787096	-0.683782	0.111752	-0.835132	0.0380773
FIGN.TSS +47233	-intron (FIGN|AMEX60DD201055759.1, intron 1 of 1)	-1.33304	0.00507368	-1.30121	0.00156463	-1.54456	0.00133576	-1.58144	0.000238169
ALB.TSS +80182	-intron (ALB, intron 28 of 62)	1.90293	0.00510633	0.680814	0.309336	0.912239	0.201104	1.20024	0.0728051
ENPP2.TSS -170548	-intron (ENPP2, intron 1 of 172)	2.21719	0.00511283	1.97755	0.0102074	1.90356	0.0182651	1.03783	0.188218
SCUBE2.TSS +100864	-intron (LLAP_4815, intron 16 of 21)	-1.78059	0.00511353	-0.221849	0.673767	-0.714617	0.221863	-0.805107	0.137697
CEP164.TSS +412225	Intergenic	1.37846	0.00512391	0.0404218	0.933749	0.38971	0.452608	0.431789	0.375483
ADARB1.TSS +930714	Intergenic	-1.74486	0.00512694	-0.75044	0.187002	-0.62845	0.292801	-0.568678	0.319437
TNS3.TSS -6211	-intron (LOC112109441, intron 64 of 188)	1.73152	0.00513889	1.41455	0.018072	1.90706	0.00212749	1.37093	0.0231051
ENG.TSS +46878	-intron (ENG|AMEX60DD201050237.1, intron 1 of 14)	1.61846	0.00514141	1.08486	0.0535321	1.20648	0.0419689	1.29463	0.0218078
PFKP.TSS -565966	Intergenic	-1.50254	0.00515624	-1.24062	0.00908525	-1.44829	0.00715364	-1.03107	0.031658
CASP8.TSS -30486	Intergenic	-1.53212	0.00516083	-0.444809	0.323233	-0.0629303	0.896764	-0.31313	0.491523
CCN4.TSS +85162		1.72131	0.00516187	0.645375	0.284084	1.00206	0.117761	0.72802	0.231654
N/A.TSS -86209		2.0936	0.00518672	0.260222	0.728384	0.878157	0.261914	0.499243	0.507323
HBA1.TSS +71893	Intergenic	-1.95634	0.00520501	-0.496095	0.388748	-1.16226	0.0752291	-0.874247	0.138315
RPS6.TSS -11392		-0.942184	0.00520524	-0.814676	0.00831424	-0.976459	0.00429666	-0.971442	0.00202575
M959_06098.TSS -38621	Intergenic	-1.99047	0.00523075	-0.308352	0.625057	-0.461448	0.487232	-1.04581	0.103923
NOS2.TSS +61884	-intron (NOS2|AMEX60DD201054519.2, intron 3 of 24)	1.461	0.00523118	1.62266	0.00134676	1.15064	0.0311334	1.31454	0.010041
ROHU_032257.TSS +163537	Intergenic	-1.65052	0.00525233	-1.40899	0.00777764	-1.47406	0.0123854	-1.25657	0.0188147
CAV2.TSS +4643	-intron (CAV2|AMEX60DD201006318.1, intron 2 of 2)	-1.6649	0.00525782	0.0582159	0.91393	0.245636	0.658627	-0.200392	0.712024
XB5932841.S.TSS -70176		1.31921	0.00526705	1.26251	0.00489269	1.2045	0.0119678	0.851124	0.062986
MUC5AC.TSS +2	#NAME?	1.22758	0.00527348	1.09021	0.0108159	0.859943	0.0557973	1.01098	0.0188729
RAD18.TSS -526249	Intergenic	-1.56504	0.00527654	-1.54247	0.00175912	-1.35305	0.0142164	-1.70129	0.000833516
PKD2L1.TSS -170	-promoter-TSS (PKD2L1|AMEX60DD201051811.1)	-1.48814	0.0052815	-1.24804	0.0137767	-1.43319	0.00785449	-0.951973	0.0609558
GATA5.TSS -598838	Intergenic	-1.11563	0.00529096	-0.408668	0.273425	-0.549943	0.16359	-0.504595	0.179864
RASD1.TSS -325500		-1.28717	0.00530066	-0.597757	0.133473	-0.559716	0.201329	-0.776059	0.0567694
CASS4.TSS +35958	-intron (CASS4|AMEX60DD201027347.1, intron 1 of 7)	2.04344	0.00530433	1.57084	0.0261557	0.713823	0.362352	1.56746	0.0280111
PIEZO2.TSS +582240	-intron (PIEZO2|AMEX60DD201038196.2, intron 4 of 53)	-1.61612	0.00532154	-0.425847	0.348333	-0.133256	0.788133	-0.11281	0.8048
ROHU_001488.TSS -782595	Intergenic	-1.96926	0.0053295	-1.9627	0.00243381	-1.72781	0.0141944	-1.75337	0.00722223
N/A.TSS -296366		-1.59616	0.00533991	-0.910047	0.0790639	-0.354121	0.513862	-1.33469	0.0117276
SST.TSS -114813	Intergenic	-1.19672	0.00534096	-1.0329	0.0046939	-0.591225	0.14071	-0.457748	0.206911
UBE2U.TSS -184834		-1.03724	0.00534549	-0.935434	0.00758866	-1.02587	0.00654158	-0.563369	0.108572
MGAT3.TSS +6516	-intron (MGAT3|AMEX60DD201029234.1, intron 1 of 1)	-1.63355	0.00534583	-0.848201	0.107751	-0.907219	0.110153	-1.01924	0.0567225
N/A.TSS +242930	Intergenic	-1.62052	0.00536879	-1.53658	0.00474637	-1.26842	0.0285336	-0.907722	0.0944243
DENND3.TSS +426414		1.30299	0.00538144	0.996269	0.0277127	0.671392	0.16686	1.01836	0.0255038
PALM2AKAP2.TSS +422369	Intergenic	1.74063	0.00538219	0.361242	0.557762	0.412374	0.540657	0.781738	0.204817
GRK5.TSS +2041	-intron (GRK5.L, intron 1 of 16)	1.96296	0.00539454	1.41871	0.0421377	1.31326	0.0671423	1.34008	0.0558154
EFNB3.TSS -32515	Intergenic	-1.3982	0.00540408	-1.30412	0.00419491	-0.768464	0.114947	-0.983442	0.031626
ST3GAL2.TSS -56168	Intergenic	1.10422	0.00540508	0.601383	0.116779	0.922223	0.0225184	0.614134	0.11259
PCYOX1.TSS +55582	-intron (DV515_00017124, intron 2 of 4)	1.91021	0.0054165	1.31985	0.0496346	0.17287	0.816703	1.01795	0.134586
ZBTB34.TSS +180082	Intergenic	1.74348	0.00543058	1.1088	0.0673411	1.65887	0.00890909	1.21478	0.0468246
TBX6.TSS -45705	Intergenic	1.20937	0.00543266	0.523214	0.213457	1.08129	0.0144114	0.422071	0.322637
WNT6.S.TSS +31871	-intron (WNT6.S, intron 3 of 11)	3.06793	0.00543654	3.40052	0.00158334	2.33713	0.0390495	2.71502	0.0124775
BRSK1.TSS +58435	-intron (BRSK1, intron 3 of 78)	1.54456	0.00546435	0.619744	0.253852	0.934782	0.104405	0.429829	0.436264
PMP22.TSS +10455	-intron (PMP22|AMEX60DD201030644.1, intron 2 of 4)	1.37513	0.00547247	0.681071	0.158647	0.429816	0.408245	0.846316	0.0814515
CHGA.TSS -956122	Intergenic	2.59117	0.00547532	0.11093	0.906062	1.16241	0.226498	0.363934	0.699676
ADARB2.TSS +54982	-intron (ADARB2|AMEX60DD201021699.1, intron 1 of 9)	-0.75842	0.0054759	-0.630548	0.0113992	-0.471971	0.0814378	-0.66192	0.00891462
EOD39_21106.TSS -41380		0.904408	0.00549161	0.302823	0.332931	0.151759	0.657904	0.319529	0.312848
NTN3.TSS -89536	Intergenic	1.1259	0.00553134	0.70444	0.0744443	0.449055	0.285651	0.89264	0.0243709
TMEM200A.TSS -133406	-intron (TMEM200A, intron 3 of 3)	1.59696	0.00553682	-0.624621	0.283942	-0.235017	0.709535	-0.265867	0.649459
FBP1.TSS -68265	Intergenic	1.91955	0.00554944	0.1928	0.780363	0.72829	0.307148	0.878737	0.202866
NLRP12.TSS +938		1.50499	0.00557836	0.35225	0.511769	1.15715	0.0361713	0.491473	0.362564
OJAV_G00135560.TSS -84480	Intergenic	1.64433	0.00558544	-0.177122	0.765524	0.107134	0.867737	0.298775	0.614741
AKAP6.TSS -194409	Intergenic	2.05873	0.00559273	1.96663	0.00593207	2.25651	0.00240814	1.62014	0.0253788
KIF6.TSS +332291		-1.81273	0.00559974	-0.212553	0.699226	-0.114927	0.844532	-0.691216	0.219095
N337_11780.TSS +45090	Intergenic	2.20318	0.00560456	1.53191	0.0502978	1.74795	0.0310626	1.29484	0.101023
CAPN8.TSS +106350	-intron (CAPN8|AMEX60DD201036179.1, intron 4 of 19)	-2.16321	0.00564851	0.0456707	0.941561	-0.27341	0.685009	-0.493262	0.438523
SLC17A9.TSS -183679	Intergenic	1.03928	0.00565071	0.570182	0.116043	0.924528	0.0153357	0.71655	0.0496718
ITGA2.TSS +326	-intron (ITGA2, intron 1 of 29)	-2.03093	0.0056655	-3.09647	1.22e-05	-0.649822	0.352702	-2.62838	0.000204005
FAM83A.S.TSS +5529	-intron (FAM83A.S, intron 1 of 3)	-1.60584	0.00567043	-1.31816	0.0133626	0.56653	0.29061	-1.55572	0.00416934
DR999_PMT10249.TSS +195891	-intron (DR999_PMT10249, intron 30 of 34)	1.4336	0.00569101	0.526279	0.293549	0.905453	0.0907091	0.811751	0.106978
SLC12A2.TSS -137	-promoter-TSS (SLC12A2|AMEX60DD201014608.1)	-0.849887	0.00571289	-0.316071	0.275777	-0.404399	0.185625	-0.410714	0.159998
DNASE1L1.TSS -5525		1.89503	0.00571688	-0.374414	0.58838	-0.650446	0.394762	0.23151	0.737221
MISP.TSS +116887	-intron (MISP, intron 6 of 34)	1.06528	0.0057234	0.378148	0.310588	0.257154	0.52597	0.323387	0.39205
ZMPSTE24.TSS -206244	Intergenic	2.6391	0.00577136	0.213224	0.824518	0.723513	0.466604	0.372488	0.699729
NAV2.TSS -106914	-intron (NAV2, intron 34 of 210)	1.63855	0.00577806	-0.0593359	0.920252	0.955887	0.114628	-0.0951419	0.873508
GPX4.L.TSS +197085	Intergenic	1.35705	0.0058017	0.414379	0.384414	0.653741	0.203266	0.450098	0.351564
FBXL7.TSS -281322	-intron (FBXL7, intron 6 of 12)	1.37889	0.00587206	0.789831	0.106647	0.406751	0.437427	0.768916	0.118906
SNAPIN.TSS -56935	Intergenic	1.08219	0.00588775	1.88545	4.97e-07	1.7704	5.14e-06	1.82544	1.27e-06
ADGRB2.TSS +252219	-intron (ADGRB2, intron 2 of 24)	1.55508	0.00588838	0.336941	0.54649	0.154863	0.795815	0.27861	0.621349
TMEM52B.TSS -124621	Intergenic	1.6545	0.00597896	-1.43014	0.0219256	-0.513701	0.436541	-0.691778	0.262692
STAU1.TSS +10200	Intergenic	1.07474	0.00603193	0.990655	0.00758186	0.816172	0.0413865	0.767508	0.0416841
DAO.L.TSS +287	-intron (DAO.L, intron 1 of 20)	-1.46919	0.00603393	-0.693946	0.142368	-0.437648	0.386811	-0.284364	0.548355
SNX10.TSS +1004337	Intergenic	1.39025	0.00605477	0.247367	0.618578	0.748393	0.154736	0.578837	0.24564
SLC8A3.TSS -144862	-intron (SLC8A3|AMEX60DD201011893.3, intron 2 of 8)	1.82983	0.00606301	1.28216	0.0454955	1.46369	0.0313653	1.71647	0.0074348
SLC12A5.TSS -73044	Intergenic	1.35566	0.00608909	1.00727	0.037253	1.06346	0.0343097	0.470014	0.33737
ETS1.TSS -21585	-intron (ETS1|AMEX60DD201053603.1, intron 3 of 9)	1.93733	0.00609336	1.19809	0.0832258	1.13625	0.121263	1.08728	0.119588
BCAS3.TSS -433001	Intergenic	-1.35252	0.00612986	-0.601153	0.16777	-1.32858	0.00751187	-0.42236	0.335957
ORF2P.TSS -531971		-1.36391	0.00613842	-0.583445	0.174514	-1.17527	0.0168697	-0.482882	0.266303
ZNF365.TSS -489496	Intergenic	-1.34962	0.00614256	-1.0944	0.0113336	-0.92604	0.0527382	-1.11316	0.0115633
SLC26A2.TSS +273379	Intergenic	0.929598	0.00615249	1.0534	0.00114593	1.04894	0.00212284	1.11661	0.000612061
PIGR.TSS -133571	Intergenic	1.68901	0.00615288	0.787883	0.195656	1.31211	0.0361923	0.279738	0.650512
A6R68_11525.TSS -18621	Intergenic	1.19241	0.0061595	0.294951	0.481427	-0.0866733	0.854713	0.595369	0.157347
MICOS10.TSS -1092041	Intergenic	1.16968	0.00616768	-0.300942	0.476489	0.133985	0.767446	0.236942	0.574321
IL17RD.TSS +2644	-intron (IL17RD, intron 1 of 43)	-0.69751	0.00618137	-0.0940344	0.68892	-0.23521	0.35002	-0.3715	0.119128
LINC02210-CRHR1.TSS +92087	-intron (CRHR1.2.L, intron 1 of 13)	1.33448	0.0062053	0.05662	0.906934	-0.192019	0.707764	-0.146862	0.763828
JPH3.TSS -16302	-intron (JPH3|AMEX60DD201017176.1, intron 4 of 5)	-1.47381	0.00622749	0.258066	0.596826	-0.0101448	0.984123	0.140395	0.774805
EIF2B2.TSS -92680	Intergenic	1.17505	0.00623117	0.794586	0.054561	0.614326	0.167873	1.13073	0.00636119
JDP2.TSS -430	-promoter-TSS (JDP2|AMEX60DD201011155.1)	-1.48516	0.00623565	-0.148804	0.748921	0.267308	0.584926	0.0592949	0.89906
SMIM29.TSS -130998	-intron (AMEX60DD301008749.1, intron 1 of 1)	1.94871	0.00627916	0.00645574	0.992791	0.0387318	0.959519	0.160502	0.823347
LITAF.TSS +773	-intron (LITAF|AMEX60DD201021431.1, intron 1 of 4)	-1.80853	0.00632121	-0.218405	0.704703	0.296018	0.620241	-0.809543	0.168503
RND1.TSS -23284	Intergenic	-1.44264	0.00633429	-0.895375	0.0555109	-0.3131	0.527574	-0.537648	0.251686
ATE1.TSS +403065	Intergenic	1.85528	0.00634395	0.416903	0.536435	0.0177156	0.980935	0.379756	0.577739
ROHU_011646.TSS +464325	Intergenic	-1.79188	0.00636532	-1.70129	0.00405051	-1.89748	0.00457408	-1.1497	0.0514984
AZU1.TSS +29231	-intron (AZU1, intron 2 of 4)	-1.68348	0.00641235	-0.341437	0.529176	-0.529557	0.362326	-0.374882	0.493456
GAB3.TSS +259902	-intron (GAB3|AMEX60DD201037157.1, intron 1 of 9)	-1.83257	0.0064678	-0.769817	0.196442	-0.702023	0.269219	-1.22474	0.0441744
FQN60_016711.TSS -66901	Intergenic	1.95542	0.0064904	0.305538	0.669449	0.574419	0.453401	0.825697	0.248068
WASHC3.TSS +367405	Intergenic	-1.48528	0.00652153	-0.813445	0.0736405	-0.464655	0.349849	-0.802868	0.0832534
GAS1.TSS -307836	Intergenic	1.95376	0.00652448	1.07645	0.127201	0.87064	0.247813	1.18563	0.094892
INPP5B.TSS -213204	-intron (LOC115073455, intron 9 of 14)	1.70023	0.00653565	0.157356	0.799885	0.0617031	0.927885	0.076931	0.902986
ELAPOR1.TSS +55269	-intron (ELAPOR1|AMEX60DD301008583.1, intron 1 of 21)	1.11805	0.00656066	-0.0782146	0.8463	0.149032	0.732365	-0.0661651	0.871521
NFASC.TSS +107359	-intron (NFASC|AMEX60DD201009064.1, intron 2 of 25)	0.952834	0.00657351	1.21783	0.000333564	1.12593	0.00138521	0.781857	0.0225092
XELAEV_18037416MG.TSS -23553	-intron (FIBCD1|AMEX60DD201050378.1, intron 6 of 6)	1.74598	0.0065789	0.608419	0.333564	-0.328989	0.652159	0.692442	0.27642
KIF6.TSS +23910		0.930513	0.0065831	0.441078	0.186804	0.0602684	0.866106	0.298114	0.376692
MZT1.TSS +1483625	Intergenic	-1.70049	0.00659399	-1.11732	0.043937	-0.688404	0.244622	-1.05927	0.0590259
BICDL2.TSS -5833	Intergenic	1.60657	0.00661171	0.19851	0.733735	0.792558	0.201117	0.631211	0.279596
OJAV_G00236990.TSS -136330	Intergenic	1.67228	0.0066249	0.989037	0.0969751	1.04925	0.100372	0.483292	0.430173
MTHFS.TSS -712239	Intergenic	-1.62433	0.00665224	0.00220204	0.996643	0.186421	0.733454	-0.0543076	0.917999
GSONMT00027998001.TSS -117247		0.931302	0.00666211	-0.0472221	0.888131	0.00306584	0.993241	0.294144	0.382319
QRSL1.TSS +302391	Intergenic	-1.66321	0.00666596	-1.00028	0.0461154	-1.13112	0.048495	-0.616949	0.21995
TRB.TSS +4953	-intron (N/A|AMEX60DD201026396.22, intron 2 of 5)	-2.11236	0.00668467	-1.42289	0.0354027	-1.68979	0.0259616	-0.580532	0.386542
FBN3.TSS +65551	-intron (FBN3, intron 2 of 64)	-1.54601	0.00673505	-0.0514152	0.919829	-0.533133	0.328749	-0.532061	0.304473
LAMC3.TSS -13748	-intron (LAMC3|AMEX60DD301050385.1, intron 3 of 10)	1.77326	0.00675172	-0.527746	0.424652	-0.0880588	0.900199	0.114458	0.862046
AGR3.TSS +405829		-1.66394	0.00676518	-1.41043	0.00983558	-0.685796	0.236995	-1.59094	0.00449941
MTHFS.TSS -910848	Intergenic	-1.45529	0.00676854	-0.564621	0.233941	-0.924563	0.0771263	-0.842869	0.0812309
HYDIN.TSS +271461	-intron (HYDIN|AMEX60DD201015526.1, intron 6 of 18)	-0.935836	0.00677086	-0.368805	0.249415	-0.403982	0.235791	-0.814697	0.0124822
GJD3.TSS -80	-promoter-TSS (GJD3|AMEX60DD201010146.1)	0.799455	0.00678804	1.30186	5.01e-06	1.11475	0.000161011	1.07173	0.000187812
KCNMB2.TSS +85119	-intron (KCNMB2|AMEX60DD201001609.2, intron 1 of 4)	-1.50051	0.00681534	-1.04491	0.0309961	-2.18666	0.000227709	-0.981103	0.0458366
Y1Q_0005011.TSS -60741	Intergenic	-1.95897	0.00693391	-0.888738	0.153669	-1.41731	0.0429254	-0.70156	0.263384
ROHU_008242.TSS -155638	Intergenic	-1.79059	0.00695536	-0.568575	0.316592	-1.08093	0.0874803	-1.03981	0.074154
FUOM.TSS -165885	Intergenic	1.35613	0.0069599	0.638176	0.186924	0.96954	0.0602305	1.26411	0.00865623
NRROS.TSS -216836	Intergenic	0.842362	0.00700038	-0.372214	0.220952	0.154016	0.638537	0.0844072	0.781166
NKX2-3.TSS +487735	Intergenic	-1.87576	0.00701046	-1.88574	0.00217074	-0.305963	0.626614	-1.50614	0.0146599
MPPE1.TSS +190623	-intron (DUI87_07790, intron 2 of 4)	-1.70128	0.0070205	-0.730971	0.135124	-0.0508407	0.922875	-0.226451	0.642414
SFPQ.TSS +105906	Intergenic	-1.45409	0.00702143	-0.920275	0.0667527	-0.536557	0.305962	-0.9271	0.066946
C8B.TSS -48751		-1.50371	0.00704381	-1.99886	9.85e-05	-1.1284	0.0395012	-1.09455	0.0298305
NRTN.TSS -38468	-intron (NRTN|AMEX60DD301014565.1, intron 1 of 3)	-1.24346	0.00704801	-0.551706	0.196251	-0.494007	0.273069	-0.724078	0.0934153
KAZN.TSS +53075	-intron (KAZN.L, intron 2 of 8)	1.79309	0.00705337	-0.0933173	0.888621	0.346663	0.620096	0.24153	0.717723
AB205_0103440.TSS -189051		-2.00094	0.00706638	-1.5904	0.0160757	-1.35599	0.0587181	-1.26971	0.0556975
EDN2.TSS -1387	Intergenic	-1.29823	0.00708136	-1.18605	0.00521102	0.454331	0.293134	-1.52149	0.000571047
KALRN.TSS +37754	-intron (KALRN|AMEX60DD201056078.10, intron 1 of 58)	1.22817	0.00708331	1.5394	0.000375191	1.48558	0.00111866	1.39295	0.00142986
PRLHR.TSS -623655	Intergenic	1.25497	0.00711105	-0.21725	0.639511	0.0397433	0.934827	-0.778007	0.100145
ASZ78_015151.TSS +73287		-2.20862	0.00711946	-0.208637	0.73364	-1.30433	0.0727374	-0.135114	0.8275
TAGLN3.TSS +3539	-intron (TAGLN3, intron 1 of 4)	1.78402	0.0071201	0.155213	0.813999	0.838822	0.227863	0.302477	0.649769
XELAEV_18029838MG.TSS -164911		1.95221	0.00715741	0.105984	0.883976	-0.535504	0.505405	-0.307296	0.67822
STPG2.TSS +144	-exon (STPG2|AMEX60DD103044025.1, exon 1 of 15)	1.03506	0.00717211	0.160131	0.668374	0.446198	0.264885	0.273843	0.468049
TCF7.TSS +14274	-intron (TCF7, intron 10 of 60)	-0.920348	0.00717235	-0.110877	0.733578	-0.313041	0.355752	-0.0576098	0.860148
SEMA6B.TSS -350119	Intergenic	1.36728	0.00718885	0.530404	0.289338	0.640739	0.221816	0.19977	0.693544
FAM162B.TSS +225602	-intron (FAM162B|AMEX60DD201034183.1, intron 3 of 3)	1.8912	0.00720314	-0.608473	0.393598	-0.742698	0.343917	0.123596	0.861662
CCNA1.TSS +1391	-exon (CCNA1|AMEX60DD201049191.1, exon 2 of 9)	-1.01839	0.00720433	-0.549847	0.1251	-0.553126	0.141711	-0.582521	0.106593
RNASEL.TSS -96985	Intergenic	1.03146	0.00720637	0.87109	0.0197093	0.783466	0.0447998	0.950174	0.0113296
KCNN3.TSS +64440	-intron (KCNN3, intron 1 of 7)	-1.21362	0.00722257	-1.27382	0.00193752	-0.293915	0.495059	-1.02767	0.0130842
PHC1.TSS -340812	-intron (LOC102932862, intron 30 of 36)	1.36559	0.00722757	-0.160004	0.751396	0.314324	0.555788	0.134984	0.790111
SPAG16.TSS -20257	-intron (SPAG16|AMEX60DD103055401.5, intron 10 of 15)	1.12952	0.00723197	0.556501	0.170356	0.478553	0.274923	0.0708851	0.864791
CANT1.TSS -127377		0.946072	0.00723447	0.262003	0.440434	0.55464	0.12637	0.485599	0.155307
TBX15.TSS +348032	Intergenic	0.735904	0.00723683	0.24785	0.353558	0.524861	0.0595831	0.515177	0.0545242
PLEKHG1.TSS +50733	-intron (PLEKHG1|AMEX60DD201035568.1, intron 1 of 17)	-2.06235	0.00725392	-0.842087	0.18951	0.0726295	0.913397	-0.642586	0.320187
GRID2IP.TSS +23864	-intron (GRID2IP|AMEX60DD201020879.1, intron 16 of 20)	-1.23023	0.00726333	0.0112225	0.977743	-0.494006	0.262028	0.0610646	0.880278
ANK2.TSS +24363	-intron (ANK2, intron 2 of 45)	2.1022	0.00726849	-0.165415	0.833885	0.119446	0.886261	-0.205372	0.796782
L1TD1.TSS -45904	Intergenic	1.33361	0.00727285	0.758722	0.1117	1.04525	0.0396151	0.628083	0.195231
LRRC3C.TSS -169050	Intergenic	1.09449	0.00728499	0.851761	0.0269428	0.669892	0.110657	0.630003	0.108581
DCDC2C.TSS -192408	-intron (ALLC|AMEX60DD201033337.4, intron 11 of 11)	-1.45263	0.00729477	-1.48576	0.00205961	-1.11655	0.0351385	-1.31623	0.00702842
SMAD6.TSS +1936	-intron (DV515_00006510, intron 1 of 2)	-0.807835	0.00729974	0.162169	0.565863	0.28322	0.332965	-0.0302869	0.91523
AGAP2.TSS +456	#NAME?	1.92578	0.00733368	0.445642	0.531722	1.53643	0.0362718	0.378463	0.600478
AB205_0020800.TSS +207598	Intergenic	-2.05415	0.00734405	-1.13112	0.104743	-1.03254	0.160616	-1.46541	0.0383596
ITGB5.TSS -84801	Intergenic	1.35472	0.00734425	-0.67643	0.184425	0.186022	0.729685	-0.257872	0.61333
ITIH5.TSS +53870	-intron (ITIH5, intron 1 of 12)	2.03614	0.00734805	2.13673	0.00372804	1.63826	0.034788	1.68022	0.0240385
TULP4.TSS +325	-intron (TULP4|AMEX60DD201035164.1, intron 1 of 14)	-2.01536	0.00734983	-0.869937	0.190976	-0.418774	0.547206	-0.82595	0.218051
GUCY2D.TSS -26237	Intergenic	1.85489	0.00736017	0.87125	0.198076	1.01285	0.161525	0.725555	0.291345
NCKIPSD.TSS -769857	Intergenic	1.99599	0.00737261	1.76648	0.0151534	1.89539	0.0118366	1.68454	0.0213299
CHCHD10.TSS -1382	Intergenic	-1.72378	0.00738675	-1.26735	0.0206076	-1.31126	0.0341148	-1.32317	0.0181855
CNTN2.TSS +43568	-intron (CNTN2|AMEX60DD201009063.1, intron 4 of 22)	1.82743	0.00739252	0.955226	0.153329	1.41696	0.0423006	0.512828	0.452023
DNAJA4.TSS -101179	-intron (LOC115466359, intron 16 of 17)	1.25177	0.00739909	0.53966	0.234849	0.779415	0.105584	0.732975	0.108645
PTGER4.TSS -300851	Intergenic	-0.969253	0.00740415	-1.56404	3.38e-06	0.241895	0.477258	-1.11902	0.000889025
TDRD12.TSS +136438	-intron (TDRD12|AMEX60DD301017601.1, intron 18 of 30)	-1.59202	0.0074188	0.396734	0.409695	0.0407852	0.93789	-0.103472	0.833423
EFCAB5.TSS +150762	-intron (EFCAB5|AMEX60DD201054804.1, intron 20 of 20)	1.40132	0.00745471	0.79769	0.113624	1.05258	0.0499392	1.00586	0.0473937
MMP11.TSS +60371	-intron (MMP11|AMEX60DD201000336.1, intron 1 of 7)	1.96354	0.00748765	0.140231	0.848541	0.533795	0.485422	-0.176993	0.812131
PFAS.TSS -149097	-intron (LOC115074096, intron 60 of 106)	2.05031	0.00750762	1.05038	0.164345	0.77706	0.337647	1.25138	0.0990771
DR999_PMT12449.TSS +17849	-intron (DR999_PMT12449, intron 1 of 14)	1.2656	0.00751923	0.195733	0.67414	0.112611	0.822435	0.408067	0.383229
OTUD7A.TSS +484324	-intron (OTUD7A|AMEX60DD201004104.1, intron 12 of 13)	1.68875	0.00757333	0.754939	0.223508	0.354039	0.600397	0.682821	0.276191
TNXB.TSS +862	-intron (LOC101388474, intron 136 of 165)	1.95822	0.00760163	0.635017	0.381579	1.32663	0.0791999	0.668293	0.361811
SFXN4.TSS -385927	-intron (GRK5.L, intron 10 of 16)	-1.0303	0.00762335	5.53e-05	0.999869	0.033061	0.927248	0.151754	0.653969
HSPA12B.TSS +42249		-1.69382	0.00768363	-1.15493	0.042436	-1.80138	0.00543162	-1.25862	0.0294949
KIF6.TSS +49682		1.44438	0.00768503	-0.129921	0.809038	0.549095	0.336875	-0.260759	0.636628
Y1Q_0017852.TSS -16560	Intergenic	-1.06669	0.00771831	-0.688564	0.0639009	-0.625179	0.114748	-0.385576	0.301046
CALHM4.TSS -67396	Intergenic	1.87657	0.00771882	0.208073	0.766908	0.621729	0.406155	0.402194	0.569614
CERS2.TSS -486	-promoter-TSS (CERS2|AMEX60DD201014755.4)	2.04413	0.00772019	-0.592338	0.445369	1.67337	0.0308065	-0.22247	0.77487
AKAP6.TSS +129616	-intron (AKAP6|AMEX60DD201012202.1, intron 3 of 8)	1.30998	0.0077325	1.03005	0.0308359	1.02685	0.0406985	0.934752	0.0520048
BMP5.TSS +399666	-intron (BMP5|AMEX60DD201033480.1, intron 2 of 6)	1.1914	0.00773375	0.179369	0.682007	0.621681	0.1792	0.402131	0.361102
C4H17ORF75.TSS -115520		1.69867	0.00774405	0.422584	0.501978	0.429344	0.527817	0.554964	0.381801
MCTP1.TSS +177446	-intron (MCTP1|AMEX60DD201042590.1, intron 3 of 8)	-1.6986	0.00775082	-1.63565	0.00556083	-1.07998	0.0836534	-1.50449	0.0114937
OJAV_G00236990.TSS +721855	Intergenic	-1.21075	0.0077545	-1.12355	0.00898947	-1.5843	0.000756984	-0.897549	0.0377412
PDGFC.TSS +2615	-intron (PDGFC|AMEX60DD301045141.1, intron 1 of 5)	-1.5742	0.00775591	0.52913	0.229638	-0.568262	0.269924	0.133312	0.768216
SIK1.TSS -131987	Intergenic	0.979977	0.00776021	0.0564143	0.874489	0.0848009	0.827902	-0.0913402	0.801982
CLCF1.TSS -125414	Intergenic	0.836454	0.00779399	1.05374	0.000421647	0.983729	0.00184463	1.0439	0.000525063
SLC26A8.TSS -132536	Intergenic	-1.31243	0.00780148	-0.629309	0.15367	0.0584083	0.899227	-0.731962	0.101864
RINT1.TSS +54358	Intergenic	1.11077	0.00781435	1.20963	0.00216856	1.33593	0.00136667	1.23135	0.00196938
PAG1.TSS +10878	-intron (PAG1|AMEX60DD201039989.12, intron 4 of 11)	-1.23875	0.0078235	-0.317915	0.431177	-0.213619	0.624485	-0.590423	0.152389
RPL3.TSS -227296	Intergenic	-1.86585	0.00785496	-0.636035	0.284813	-0.483508	0.449411	-1.05174	0.0845584
KIF6.TSS +751499		-0.923086	0.00785627	-0.475818	0.14376	-0.663028	0.0563528	-0.726247	0.0275582
TCTE3.TSS +114107	Intergenic	1.28515	0.00786788	-0.0856227	0.857382	0.686093	0.171894	0.523992	0.269216
PODXL2.TSS +2202	-intron (PODXL2, intron 1 of 3)	-0.786311	0.007873	0.1845	0.507138	0.238557	0.407968	0.166893	0.550495
OTUD7A.TSS -259142	-intron (OTUD7A|AMEX60DD201004104.1, intron 3 of 13)	1.73781	0.00789672	0.34103	0.598342	0.828476	0.226018	0.465699	0.47579
NAA60.TSS +623039	Intergenic	1.31946	0.00791855	0.537931	0.26681	0.30354	0.563358	0.473994	0.33339
N/A.TSS +150358	-intron (SLIT1|AMEX60DD201052864.1, intron 27 of 38)	2.00869	0.00793522	0.808436	0.28091	-0.0664243	0.935672	0.221852	0.771458
ADCY6.TSS -59397	Intergenic	1.19301	0.00793679	1.16621	0.00731903	0.518636	0.26579	0.87906	0.0453429
PLXND1.TSS +32272	-intron (PLXND1|AMEX60DD201023498.1, intron 1 of 18)	-1.5468	0.0079469	0.23256	0.643208	-0.0207382	0.969074	-0.15613	0.75918
ELAVL2.TSS +8224	-intron (ELAVL2, intron 1 of 3)	1.76005	0.00796538	0.724629	0.264544	0.605396	0.39079	0.620103	0.346861
TMEM232.TSS -79748	Intergenic	0.828015	0.00798598	0.412971	0.167544	0.539078	0.0920574	0.658366	0.0285584
RAB3IL1.TSS +347	-exon (DR999_PMT15364, exon 3 of 23)	-1.20481	0.00798706	0.367791	0.355428	0.331005	0.430862	0.169771	0.67298
PRRG2.TSS +236		-1.68071	0.00799386	-1.57753	0.00573157	0.790331	0.163402	-1.98464	0.000796452
HAPLN4.TSS +224173	-intron (HAPLN4, intron 2 of 10)	1.87379	0.00799909	1.66603	0.0145676	1.69871	0.017882	1.6761	0.0146767
MMP19.TSS +365	-exon (MMP19|AMEX60DD301029882.1, exon 1 of 9)	-1.70407	0.00805454	-1.2799	0.02118	0.0121183	0.983155	-1.81157	0.00185806
SPECC1.TSS +90558	-intron (SPECC1|AMEX60DD201054782.5, intron 2 of 6)	0.827896	0.00809716	0.901946	0.00230244	1.04241	0.000866492	0.828838	0.00557217
ARHGAP39.TSS -228931		-0.976561	0.00811444	-0.411697	0.214806	0.199598	0.566887	-0.00094478	0.997732
XB5748694.TSS +31200	-exon (XB5748694, exon 5 of 13)	-1.71365	0.00814487	-2.11756	0.000415279	-0.118676	0.843757	-2.57435	4.06e-05
MAGI2.TSS -268978	Intergenic	2.24192	0.00818126	2.42168	0.00288317	1.76441	0.041919	1.94976	0.0180139
RPL27.TSS +340981	-intron (CEP128, intron 30 of 33)	-1.91225	0.00819539	-0.23797	0.670097	-0.41226	0.506098	0.0129372	0.981638
U2AF1.TSS -56587	Intergenic	1.42352	0.00821117	-0.693717	0.201394	0.339453	0.547816	-0.463948	0.396309
PCP4.TSS +51138	-intron (PCP4|AMEX60DD301047161.1, intron 1 of 2)	-1.68113	0.00822557	-1.46071	0.0137365	-1.76868	0.00638965	-0.98841	0.0955357
PHYPO_G00101630.TSS -51132	Intergenic	1.22168	0.00823511	1.19739	0.0069107	1.49014	0.00127354	1.28065	0.00408117
SPSB2.TSS +4982	-intron (AMEX60DD201026819.2, intron 1 of 1)	-1.17649	0.00823846	-2.08738	4.56e-07	0.532898	0.179494	-1.28372	0.0014445
TLL1.TSS +11567	-intron (TLL1, intron 1 of 20)	1.71993	0.00825064	1.47807	0.0177074	1.92279	0.00312865	1.96677	0.0015943
LOXL3.TSS -115890		1.18242	0.00826734	0.318709	0.470571	0.813522	0.0738674	0.133307	0.764803
RNMT.TSS -1169913	Intergenic	-1.66927	0.00827013	-0.743071	0.197262	-1.38593	0.0278345	-0.952469	0.102361
UBL5.TSS -55351		1.72202	0.00828148	0.0215327	0.973591	0.550895	0.42552	0.0225412	0.972754
H355_014607.TSS -32993	Intergenic	-1.73064	0.00828299	-1.9886	0.00096628	-0.729062	0.242822	-1.60285	0.00799178
GP9.TSS -247	-promoter-TSS (GP9|AMEX60DD301024035.3)	1.30205	0.00832937	-0.163655	0.737333	0.0284259	0.957421	0.18059	0.712332
CSMD2.TSS +70021	-intron (CSMD2, intron 5 of 13)	1.62636	0.00835548	0.194877	0.749363	0.633197	0.330257	1.05404	0.0810765
SEMA3D.L.TSS +104272	-intron (SEMA3D.L, intron 4 of 34)	-1.65185	0.00836404	-0.120421	0.817133	-0.120692	0.829725	-0.15501	0.76861
PARPI_0012521.TSS +610643	Intergenic	2.04853	0.00838387	-0.350987	0.654955	0.415699	0.612031	-0.793921	0.324843
IDI1.TSS -628652	Intergenic	-1.57283	0.00839888	-1.27422	0.0209828	-1.19036	0.0443864	-1.01826	0.0663393
PREX1.TSS -112732	Intergenic	1.50807	0.00840074	0.701998	0.207089	0.121349	0.844812	0.739294	0.188466
COMTD1.TSS -367343	Intergenic	-2.05721	0.00841284	-0.687236	0.319337	-0.132834	0.852614	-0.623464	0.369404
GRAMD1B.TSS -9639	Intergenic	2.21524	0.00841739	2.19818	0.00665162	2.12318	0.0124291	1.93169	0.0183251
KDF1.TSS +373796	Intergenic	0.840807	0.00841927	0.763058	0.0131854	1.00643	0.00169553	0.796154	0.0101546
BARX1.TSS +3098	-intron (BARX1|AMEX60DD102023676.2, intron 1 of 2)	-1.6517	0.00842259	-0.610446	0.285115	0.946204	0.100686	-0.769343	0.182239
FOXA3.TSS -287764	Intergenic	1.51512	0.00842497	-0.100978	0.859817	-0.141636	0.823197	0.281946	0.622754
KIAA1500.TSS -122280		-1.10787	0.00843078	-0.768548	0.0543243	-0.451015	0.277286	-0.939151	0.0198388
NKX2-5.TSS +140858	Intergenic	1.70431	0.00843309	0.428732	0.503023	0.41975	0.539581	-0.121918	0.85249
ADGRB2.TSS -100388	Intergenic	2.11294	0.00843571	0.544692	0.495865	0.950116	0.25055	0.591026	0.462402
SDK2.TSS +52369		-1.13169	0.00843686	-0.263765	0.490834	-0.594256	0.156197	-0.419966	0.279473
PI15.TSS -438479	Intergenic	-1.65404	0.00844025	-1.40958	0.0136425	-1.61412	0.0109255	-1.65613	0.004587
NEK1.TSS +213629	-intron (NEK1, intron 6 of 31)	-2.62023	0.0084799	-0.943598	0.255394	-1.14394	0.20286	0.0653239	0.936774
DR999_PMT01068.TSS +464880	-intron (DR999_PMT01068, intron 10 of 137)	1.89374	0.00848927	1.468	0.0349115	1.7754	0.0148531	0.985221	0.165306
SLIT3.TSS -258935	Intergenic	1.70545	0.00849509	0.514531	0.417602	1.39567	0.0349033	0.343518	0.596629
N/A.TSS -118092		1.59274	0.00849859	-0.146036	0.809132	0.941388	0.126989	-0.101837	0.867139
PAX2.TSS -1397653	Intergenic	-1.56954	0.00850324	-0.858412	0.117358	-1.23725	0.0370735	-1.08928	0.0498305
ROHU_000188.TSS -373787	Intergenic	-1.70811	0.00854444	-1.11233	0.0510358	-0.944033	0.127857	-1.41448	0.0156187
AVP.TSS +26988		-1.55269	0.00858036	-1.85648	0.000564123	-1.23235	0.0343112	-1.28153	0.0167613
CRB3.TSS -45852		1.1627	0.00858909	0.687388	0.107352	0.769979	0.0904969	0.356533	0.412189
DUI87_17438.TSS +13166	-intron (COMT|AMEX60DD301000155.1, intron 1 of 4)	1.914	0.00860083	0.889453	0.214778	0.280731	0.721304	-0.111113	0.881334
SLC38A8.TSS +161111	-intron (SLC38A8|AMEX60DD201015842.1, intron 3 of 9)	-1.4353	0.00861195	-1.16057	0.0153675	-1.22441	0.0231019	-1.1062	0.023043
D9C73_028124.TSS -116710	Intergenic	1.58075	0.00861314	-0.0730307	0.903003	0.755023	0.229097	-0.0143468	0.981139
HECW2.TSS +209103	-intron (LLAP_22782, intron 1 of 1)	2.08574	0.00861733	-0.207306	0.795396	-0.0923339	0.913519	-0.576825	0.478811
CCDC120.TSS -5713		1.70394	0.00862807	1.83845	0.00280897	2.58412	4.47e-05	1.56385	0.0121878
SMYD2.TSS -575559	Intergenic	3.01542	0.00864598	-0.133457	0.908151	1.58841	0.171643	0.3755	0.745457
UY3_04341.TSS -733644	Intergenic	1.37418	0.00865756	0.237034	0.643947	1.09339	0.0409395	0.680645	0.184704
PARPI_0001527.TSS +126510	-intron (PARPI_0001527, intron 4 of 16)	1.47375	0.00866434	0.67452	0.216388	0.853614	0.142906	0.809718	0.140887
CAV2.TSS +49018	-intron (CAV2|AMEX60DD201006318.1, intron 2 of 2)	1.47067	0.0086656	1.50746	0.00506117	0.945445	0.102242	1.15408	0.0341713
TCERG1.TSS -790126	Intergenic	0.772956	0.00866563	0.675471	0.0169806	0.706871	0.0178888	0.621601	0.0293832
VPS13B.TSS +211196	-intron (VPS13B|AMEX60DD201040188.1, intron 1 of 61)	1.18895	0.00866624	0.395039	0.369901	0.858449	0.0642999	0.311128	0.485869
ATP2B2.TSS -1135748	Intergenic	-1.11761	0.00868383	-1.13724	0.00318699	-0.740164	0.0769631	-0.699984	0.0697376
GABBR2.TSS -92767	Intergenic	1.21301	0.00868456	-0.0235451	0.958594	0.673194	0.159721	0.0405512	0.929668
SLC22A3.TSS +119494	Intergenic	-1.50658	0.00868625	-1.27923	0.00940575	-1.27424	0.0227158	-0.990079	0.0460334
HMX3.TSS +50458	Intergenic	1.67359	0.00868662	0.192083	0.76187	0.536679	0.420896	0.0416823	0.948239
SEMA5B.TSS +562014	-intron (SEMA5B|AMEX60DD201056098.1, intron 5 of 22)	1.61549	0.0086889	1.75374	0.00290835	1.51987	0.0148147	1.11826	0.0625094
FBXO40.TSS +451	-intron (FBXO40|AMEX60DD301046926.1, intron 1 of 3)	-0.814612	0.00869835	-0.181798	0.529487	-0.334981	0.275675	-0.742804	0.0116925
GRK5.TSS +63303	-intron (GRK5.L, intron 1 of 16)	2.06887	0.00869929	1.29414	0.0923467	1.08241	0.191173	1.30038	0.0938961
GPR132.TSS -182118	Intergenic	1.54403	0.00873087	1.28082	0.0252318	0.784336	0.199654	1.09625	0.0576845
RASGRP1.L.TSS -400490	Intergenic	1.77281	0.00873939	0.163849	0.807643	0.679374	0.338886	-0.472944	0.497347
KLHL1.TSS -2402901	Intergenic	-0.912723	0.00877634	-0.842692	0.00830408	-0.900214	0.0105526	-0.922029	0.00452909
PHLDA1.TSS +698	-exon (PHLDA1|AMEX60DD201007769.1, exon 1 of 2)	-0.733638	0.00877726	0.279935	0.27497	0.0628771	0.817339	0.137116	0.59622
KLHL13.TSS -583727	Intergenic	-1.11545	0.00879431	-0.883418	0.015689	-0.978683	0.0188968	-0.522873	0.154245
ATP1A3.TSS +29733	-intron (ATP1A3|AMEX60DD201018046.1, intron 1 of 22)	1.63518	0.00879566	0.622583	0.307957	1.48256	0.01931	0.662869	0.282819
SEMA3E.TSS +41228	-intron (SEMA3E.L, intron 3 of 5)	2.3444	0.00879729	0.25153	0.779253	1.55837	0.0864758	0.552124	0.539325
PCP4.TSS -287048	Intergenic	1.97132	0.00880854	-0.787972	0.2994	-0.104397	0.893902	-1.52616	0.0496269
MYO1G.TSS -349200		1.02775	0.00881776	1.27421	0.000734654	0.939761	0.0181555	1.07516	0.0047118
TMEM240.TSS -124589	Intergenic	1.12075	0.00883658	0.259164	0.531492	0.410205	0.360302	0.466965	0.263058
NRXN3.TSS -1623712	Intergenic	0.804996	0.00883825	1.40148	2.01e-06	1.34771	1.02e-05	1.26962	1.86e-05
DR999_PMT01325.TSS +77044	Intergenic	-1.34156	0.00884578	-2.03607	2.93e-05	-0.854217	0.0913387	-2.19911	1.07e-05
ARHGAP4.TSS +16591		2.72051	0.0089326	1.28151	0.216505	1.55115	0.146137	0.6304	0.548616
SMOC2.TSS +427		-0.878979	0.00897613	-0.224361	0.488656	-0.50759	0.130896	-0.300409	0.355913
DMTN.TSS -2005	Intergenic	-1.54926	0.00898947	-1.08641	0.0313962	-1.4711	0.01212	-0.546478	0.277483
SYT6.TSS -164604	-intron (SYT6|AMEX60DD201008851.1, intron 1 of 6)	1.01864	0.00900545	0.268214	0.478088	0.878735	0.026707	0.492407	0.195361
DR999_PMT16250.TSS -768681	Intergenic	1.36102	0.00901984	-0.0033609	0.994793	0.635936	0.24071	0.424897	0.409816
OSBP2.TSS -15533	-intron (LOC109290317, intron 7 of 26)	-1.17164	0.00903118	-0.675448	0.0972521	-0.828091	0.0624195	-0.7682	0.0628791
ASZ78_006757.TSS -8695	Intergenic	-0.897087	0.00903204	-0.293359	0.357876	-0.10699	0.749671	-0.294344	0.360009
NPR1.TSS -30797	-intron (NPR1|AMEX60DD201015014.1, intron 1 of 21)	1.22723	0.00910165	0.485093	0.285302	1.04603	0.028983	0.998185	0.0277157
KIF5A.TSS -85047	Intergenic	0.981098	0.00911198	0.139114	0.704936	0.68338	0.0754799	0.656381	0.07382
EMX2.TSS +8458	-intron (EMX2|AMEX60DD201053236.1, intron 2 of 2)	-1.74981	0.00913489	-0.98985	0.087306	0.884256	0.129434	-1.23365	0.0374656
MTHFS.TSS -818599	Intergenic	-1.54482	0.00913944	-0.179096	0.721297	0.373798	0.477772	-0.633644	0.217899
ZCCHC9.TSS -63845	Intergenic	1.43164	0.00914421	0.522831	0.329089	-0.173776	0.773383	0.62379	0.248411
SLITRK2.TSS +410126	Intergenic	-1.57883	0.00915126	-1.28418	0.0200174	-1.1822	0.0481521	-0.751039	0.173211
DV515_00000735.TSS +135640	Intergenic	-1.7411	0.00915187	-0.999918	0.0934351	-0.341817	0.58359	-0.937819	0.119123
LIX1.L.TSS -222238	-intron (LIX1.L, intron 3 of 5)	-1.46127	0.00915932	-1.42377	0.00439004	-1.00509	0.0652534	-1.31001	0.00977891
ENO4.TSS -106768	Intergenic	1.60946	0.00916862	0.653014	0.283174	0.399945	0.538518	0.193402	0.754662
USH1C.TSS +209230	-intron (USH1C|AMEX60DD201004694.1, intron 8 of 19)	0.693921	0.00918975	0.307815	0.226253	0.194242	0.482382	0.462923	0.0708464
SLC7A10.TSS -511986	Intergenic	1.70166	0.00919009	-0.439674	0.504004	0.672711	0.321816	-0.117412	0.858912
GPR132.TSS -537782	Intergenic	1.3911	0.00924002	1.22435	0.016621	1.25876	0.0203443	1.0131	0.0505956
TAF12.TSS -65932	Intergenic	1.04893	0.0092614	0.45794	0.247422	0.649915	0.113591	0.223416	0.575971
ACKR3.TSS +627895	Intergenic	-1.80052	0.00930319	-1.02859	0.085466	-0.923329	0.157138	-0.988326	0.102842
PARPI_0030375.TSS +30725	-intron (PARPI_0030375, intron 1 of 11)	1.7339	0.009308	0.794969	0.227583	-0.215046	0.765279	0.155375	0.816595
CCT4.TSS -18559	-intron (COMMD1|AMEX60DD103035655.2, intron 1 of 2)	1.84399	0.00935161	0.855302	0.217003	2.03776	0.00413375	0.809564	0.249092
MAGI1.TSS -323754	Intergenic	-1.54307	0.00940276	-0.911748	0.0687364	-0.840091	0.13179	-0.893805	0.0796822
ZBTB16.TSS -202189	Intergenic	0.957676	0.00940722	-0.0745535	0.836451	-0.181985	0.643647	0.363181	0.315014
PRDX6.S.TSS -116121	Intergenic	-1.46	0.00942261	-0.86262	0.0660683	-0.817751	0.119997	-0.771778	0.105576
FKBP10.TSS +31123	-intron (FKBP10|AMEX60DD301010079.1, intron 4 of 9)	1.94067	0.00943964	1.43438	0.0488445	1.72911	0.0228241	1.69794	0.0200909
UBE2M.TSS -45445	Intergenic	1.6443	0.00944189	0.179439	0.775233	0.2133	0.753162	0.616077	0.327328
TNNI3.TSS -96282	-intron (DNAAF3|AMEX60DD201017439.1, intron 9 of 10)	1.35322	0.00944972	-0.233942	0.65129	0.274296	0.622439	0.0614565	0.906062
EXOC3L2.TSS +263628	-intron (EXOC3L2, intron 3 of 37)	0.602152	0.00947358	0.405724	0.066029	0.165324	0.491198	0.589004	0.00798956
AB205_0033650.TSS -542122	Intergenic	-1.08247	0.00951497	-0.349907	0.332239	-0.60878	0.131162	-0.617928	0.0948967
CELF6.TSS +226415	-intron (CELF6, intron 42 of 482)	2.25117	0.00954976	0.934693	0.278768	0.468274	0.611692	0.651711	0.455086
HOXB13.TSS +8301	-intron (HOXB13|AMEX60DD201010173.1, intron 1 of 1)	-1.17317	0.00957875	-0.721577	0.0609461	-0.559062	0.190394	-0.453685	0.242282
XELAEV_18011398MG.TSS -299464	Intergenic	1.91343	0.00957991	0.914808	0.210289	0.939498	0.218854	0.250132	0.736544
FAM168A.TSS +499603	-intron (FAM168A|AMEX60DD201049777.1, intron 3 of 8)	-0.920647	0.00960325	-0.106278	0.751374	-0.31177	0.374836	-0.0308987	0.926914
EI555_007241.TSS +53619	-intron (AHCYL2|AMEX60DD201008020.1, intron 1 of 16)	-1.59499	0.00960895	-1.35809	0.0139865	-0.287766	0.616539	-1.20258	0.031212
ACSS1.TSS -483594		1.03209	0.00961312	0.479786	0.207459	0.877396	0.0303735	0.364713	0.346442
THSD7B.TSS +332424	-intron (THSD7B, intron 2 of 14)	-1.16642	0.00962251	-1.00183	0.020699	-0.942289	0.0370935	-0.797396	0.0664395
PCSK6.TSS -13216	Intergenic	1.56204	0.00962941	1.89606	0.00116723	1.95609	0.00116177	0.803906	0.176978
FABP7.TSS +611569	Intergenic	1.25559	0.00963307	0.0947067	0.841796	-0.138238	0.793866	0.514545	0.278735
TEX9.TSS +93643	-intron (TEX9|AMEX60DD102003656.3, intron 3 of 9)	1.30204	0.00963308	0.0473278	0.92365	0.352135	0.508388	0.0707009	0.887784
SEMA5B.TSS +51041	-intron (SEMA5B|AMEX60DD201056098.1, intron 1 of 22)	1.50188	0.00963308	1.48263	0.00705194	1.0867	0.0680625	1.09608	0.0506367
RBBP8NL.TSS -354934	Intergenic	-1.77681	0.0096332	-1.42017	0.0195702	-0.973885	0.136841	-1.22859	0.0453359
BAYA_14209.TSS -232343	Intergenic	2.08409	0.00963379	1.39149	0.0773492	1.62094	0.0492527	1.71566	0.0297915
MAN1C1.TSS +17655	-intron (MAN1C1|AMEX60DD101005765.1, intron 3 of 13)	2.3055	0.00964117	1.96328	0.0236132	2.03211	0.0248248	1.83852	0.0355285
MVB12B.TSS -108014	Intergenic	1.69039	0.00964189	-0.180301	0.782983	0.56227	0.415776	0.490403	0.451016
TTC27.TSS -474470	Intergenic	-1.43611	0.00964322	-1.1402	0.0209179	-0.525541	0.317887	-0.396108	0.418817
MARCHF4.TSS -152322	Intergenic	1.34315	0.00965558	-0.320587	0.535262	-0.901956	0.12595	-0.258708	0.621013
ALDH3B1.TSS +18521	Intergenic	1.41465	0.0096589	0.263872	0.624402	0.556212	0.328586	0.489387	0.366175
HMX1.TSS +1450321		1.41827	0.00966607	0.46941	0.378316	0.966168	0.0871272	0.895055	0.0932778
DR999_PMT15000.TSS -571175	Intergenic	-1.4924	0.00967227	-0.637056	0.21666	-0.246517	0.650014	-0.346448	0.503234
LRRC3C.TSS -172712	Intergenic	0.921349	0.00969288	0.19443	0.57104	0.103546	0.783138	0.0338363	0.92294
ROHU_028354.TSS -186633	Intergenic	1.17106	0.00970004	0.421507	0.333341	0.323298	0.499047	1.0555	0.01495
PAG1.TSS +99714	-intron (PAG1|AMEX60DD201039989.12, intron 1 of 11)	1.449	0.00971339	0.720229	0.191812	1.02687	0.0719737	1.26952	0.0213444
CASZ1.TSS -205330	Intergenic	0.96498	0.00973324	0.630146	0.0777638	0.561303	0.144573	0.934163	0.00916503
MUC2.TSS -59859	-intron (MUC2|AMEX60DD201004438.1, intron 31 of 46)	1.37392	0.00973949	0.252101	0.630688	0.678351	0.21623	0.299141	0.571397
DOC2B.TSS +15373	-intron (DOC2B|AMEX60DD201054700.1, intron 1 of 2)	0.774778	0.00974365	0.328996	0.262061	0.287794	0.348431	0.236864	0.42265
PIGC.TSS +245863	Intergenic	2.48697	0.00975502	1.40421	0.141845	0.79323	0.430493	0.292134	0.764464
CNKSR2.TSS -387554	Intergenic	1.33491	0.00976707	0.0164846	0.974166	0.313703	0.566603	0.29543	0.563732
GPR1.TSS -939	-promoter-TSS (GPR1|AMEX60DD301055053.1)	0.879845	0.00978411	0.85879	0.00894479	1.18581	0.000499156	0.72495	0.0286402
CCDC114.TSS +137744	Intergenic	1.55194	0.00979925	0.682459	0.242876	0.284567	0.659848	0.47753	0.422501
ITGA7.TSS -53435	-intron (ITGA7|AMEX60DD201029894.1, intron 1 of 24)	0.93642	0.00983028	0.434106	0.212609	0.34838	0.356249	0.663262	0.0582304
GSTENG00024593001.TSS -2951	Intergenic	1.21715	0.0098492	0.207564	0.649019	0.421668	0.394894	0.110887	0.812113
RPS5.TSS -127236	Intergenic	2.08909	0.00987716	0.38823	0.630926	0.959993	0.254805	-0.702553	0.405711
UNC5D.TSS -177392	-intron (STUM.S, intron 1 of 1)	-1.49358	0.00988691	-0.360044	0.478455	0.228117	0.666882	-0.170031	0.739228
B3GLCT.TSS +934670	Intergenic	-1.43908	0.00989292	-0.78244	0.117842	-0.170377	0.745415	-0.898385	0.0767744
NPR3.TSS +140707	-exon (NPR3.L, exon 9 of 29)	1.32785	0.00990736	-0.846111	0.105502	0.0405377	0.941617	-0.349863	0.502367
N/A.TSS +112334	Intergenic	-1.54058	0.00991064	-1.25834	0.0181069	-0.222549	0.688414	-1.15839	0.0316353
SYNPO2L.TSS +78800	-intron (SYNPO2L|AMEX60DD201051857.2, intron 1 of 3)	2.04051	0.00996515	0.0527364	0.947044	0.927536	0.257512	0.698812	0.377584
UY3_04341.TSS -721864	Intergenic	1.17675	0.00997397	0.0113964	0.979791	0.272477	0.568466	0.16312	0.718792
ANGPTL2.TSS -68982	Intergenic	2.16603	0.00998755	1.81846	0.0262209	1.67212	0.0524417	1.04803	0.209996
MRPL22.TSS +378291	Intergenic	1.6218	0.01	0.121228	0.846253	0.558256	0.398256	0.956195	0.123647
DISP1.TSS +130525	Intergenic	1.89618	0.0100647	0.829567	0.253793	-0.0596795	0.941014	0.493176	0.503969
SNORC.TSS +70839	-intron (SNORC, intron 1 of 2)	1.23225	0.0100694	0.524595	0.265326	1.08193	0.0255113	0.613153	0.195058
TPP1.TSS +89133	Intergenic	-1.08328	0.0100732	-0.641897	0.0854801	-0.733683	0.0758619	-0.55403	0.142394
KCNMB2.TSS -12188	-intron (KCNMB2|AMEX60DD201001609.2, intron 4 of 4)	1.81952	0.0100755	1.33042	0.0507238	1.77856	0.0126382	0.874067	0.209981
DR999_PMT04422.TSS +221006	-intron (UROC1|AMEX60DD103023457.1, intron 16 of 17)	1.53916	0.0100852	0.56821	0.330222	0.583532	0.355614	0.411046	0.488882
LRP1.TSS +1094	-intron (LRP1|AMEX60DD201029732.1, intron 1 of 35)	-1.09126	0.010094	-0.180902	0.626447	0.365872	0.349492	-0.188139	0.61686
ORF2P.TSS -47928	Intergenic	0.761135	0.0100997	1.80893	1.87e-10	1.4526	7.12e-07	1.14607	6.28e-05
TIMD4.TSS -160715	Intergenic	-1.42648	0.0101021	-1.24886	0.010315	-1.61863	0.00419463	-1.31489	0.00833312
PCED1A.TSS +216744		-1.18036	0.0101105	-1.23472	0.00269773	-1.20231	0.00930817	-0.937493	0.0236156
DDAH1.TSS -31	-promoter-TSS (DDAH1|AMEX60DD201019014.2)	-1.20288	0.0101384	-1.06819	0.0110767	-1.69636	0.000552525	-1.65969	0.000162601
NINJ1.TSS +1233	-intron (NINJ1|AMEX60DD201023688.2, intron 1 of 4)	-1.47515	0.0101443	-0.725823	0.181426	-0.782548	0.166697	-1.04859	0.055762
MGLL.TSS +296960	-intron (MGLL|AMEX60DD201023389.3, intron 4 of 8)	-1.45588	0.010153	0.323711	0.485314	0.0833664	0.868538	0.459898	0.324832
EOD39_13800.TSS +493292	Intergenic	1.74262	0.0101533	0.638984	0.341191	0.161637	0.821791	0.120195	0.86003
SLC25A20.TSS -135833	Intergenic	1.53618	0.0101539	0.635488	0.27743	1.1604	0.0577737	1.31799	0.0238231
S1PR5.TSS +39377		-1.46134	0.0102022	-1.34545	0.0102917	0.0252838	0.962381	-1.52719	0.00426126
PARPI_0019568.TSS -10404	-intron (KCNJ1|AMEX60DD102053595.1, intron 1 of 1)	1.69261	0.0102408	1.21047	0.0562626	1.10599	0.104832	0.56202	0.390229
ATP5MC2.TSS +1071466	Intergenic	-1.63532	0.0102614	-1.28401	0.0239698	-0.181917	0.75773	-1.15767	0.0440133
GABBR2.TSS +59230	-intron (GABBR2|AMEX60DD201039021.1, intron 1 of 18)	2.15467	0.0102776	1.63106	0.0458773	1.50064	0.0835274	1.53044	0.0635705
PARPI_0006348.TSS +100946	-intron (LOC102279365, intron 8 of 9)	-1.49705	0.0102797	-1.77851	0.000970411	-1.03441	0.0712097	-1.18239	0.027635
ZNRF3.TSS +2047	-intron (ZNRF3, intron 2 of 13)	1.31469	0.0102822	0.272556	0.589014	0.984765	0.0593172	-0.448626	0.387037
ETV3.TSS +552583	Intergenic	-1.13818	0.0102995	-0.634773	0.115555	-1.03221	0.0206573	-0.780488	0.0566366
AMBN.TSS -26876	Intergenic	1.30463	0.0103037	0.342325	0.495034	0.930765	0.0721254	-0.0948936	0.852188
DNAH9.TSS -493323	-intron (DNAH9|AMEX60DD201030575.1, intron 41 of 69)	1.33655	0.0103116	-0.991565	0.0627411	-0.367227	0.523608	-0.639735	0.231844
IST1.TSS +103352	-intron (IST1|AMEX60DD201016968.1, intron 1 of 6)	0.982799	0.0103327	-0.2875	0.446063	0.757765	0.0524483	0.116351	0.758204
POSTN.TSS -368556	Intergenic	1.82555	0.0103459	-0.606364	0.39944	0.599572	0.416536	-0.0608364	0.93254
HYPK.TSS +702900		1.1326	0.0103757	-0.640465	0.146962	0.454891	0.321901	0.254574	0.559495
CORIN.TSS -936745		-1.14331	0.0103918	-0.761687	0.071513	-0.371946	0.396277	-0.877478	0.0395514
HSF4.TSS +19371	-intron (HSF4, intron 1 of 4)	1.53546	0.010397	1.15521	0.0479883	0.504139	0.423072	1.2994	0.0267675
ERICH3.TSS +857137		-0.742398	0.0104001	-0.956859	0.00042921	-0.735471	0.0122013	-0.794669	0.00373545
GPR37.TSS +94394	-intron (GPR37|AMEX60DD201006258.1, intron 1 of 1)	1.82478	0.0104075	0.641999	0.35981	0.986374	0.18439	0.438662	0.538655
DPX16_22564.TSS +162671	Intergenic	-1.4321	0.0104696	-1.40048	0.00596452	-1.12294	0.042686	-0.992557	0.0517626
MAP1A.TSS +6568	-intron (MAP1A|AMEX60DD201003375.1, intron 2 of 6)	1.02332	0.0104774	1.39128	0.000217637	1.65257	2.65e-05	1.23202	0.00119683
PAX2.TSS -1012221	Intergenic	1.06231	0.0104922	0.591415	0.14026	0.866588	0.0404712	0.696297	0.0846934
DR999_PMT10889.TSS +124407	-intron (DR999_PMT10889, intron 2 of 29)	1.64067	0.0105088	0.710461	0.259127	0.534478	0.429032	-0.0532769	0.934493
TNFRSF21.TSS -506374	Intergenic	-1.20646	0.0105126	-1.27983	0.00267328	-1.62608	0.000945208	-1.34813	0.00197908
BUB3.L.TSS +382310	Intergenic	-1.47752	0.0106214	-0.815981	0.0927337	-1.32101	0.019574	-0.845629	0.0877832
MYCBP2.TSS -284227	Intergenic	-0.908802	0.0106809	-0.85588	0.00769532	-0.907799	0.0113727	-0.764845	0.018797
VWA8.TSS +241949	-intron (VWA8|AMEX60DD301049109.1, intron 3 of 11)	-1.74849	0.0106928	-0.562316	0.316256	-0.313788	0.605761	-0.758252	0.186443
HHIPL2.TSS +935	-intron (HHIPL2|AMEX60DD102036165.2, intron 1 of 7)	-1.03932	0.0107436	-0.206145	0.595279	-0.385491	0.338813	-0.461875	0.237173
NCF2.TSS -114678	Intergenic	1.53013	0.0107473	0.568792	0.33422	0.376367	0.553021	0.635821	0.28411
SLC4A1.TSS +1599	-intron (SLC4A1|AMEX60DD201009895.1, intron 1 of 19)	1.50831	0.0107732	0.657793	0.250127	0.797492	0.196093	0.836722	0.146763
CFAP61.TSS +1000143	-intron (CFAP61|AMEX60DD103035490.1, intron 16 of 24)	1.42115	0.0107791	-0.301035	0.588296	0.437695	0.456178	0.472678	0.391242
TOX2.TSS -89970	Intergenic	-1.50868	0.0108104	-0.863457	0.0895135	-0.653582	0.239454	-0.677067	0.187137
TLN2.TSS +44462	-intron (TLN2|AMEX60DD301004014.1, intron 2 of 19)	-1.38161	0.0108155	-1.39769	0.00408602	-1.04807	0.0491839	-0.548523	0.253662
VSIG10L2.TSS +85495	Intergenic	1.22012	0.0108521	0.0152517	0.97401	-0.210503	0.688872	-0.266011	0.581603
FABP1.TSS +8795		-1.26915	0.0108581	-1.04696	0.0228604	-0.751325	0.125459	-0.658493	0.15315
RHBDL1.TSS +211509		1.4289	0.0108845	-0.325193	0.56183	-0.660704	0.301166	0.512818	0.354475
MTPN.TSS -132010	Intergenic	0.893946	0.0108938	-0.00281821	0.993392	0.531583	0.14112	0.430884	0.205839
NRXN2.TSS -192336	-intron (NRXN2|AMEX60DD201025259.1, intron 3 of 6)	1.71055	0.0109057	0.102519	0.878354	1.13629	0.0972539	-0.915832	0.186801
ATOH1.TSS +346724	Intergenic	1.09346	0.0109129	0.68347	0.0923399	0.485729	0.27665	1.19848	0.00310795
SLIT2.TSS +100433		-1.51096	0.0109232	-0.905112	0.103914	-1.68716	0.00548817	-1.15394	0.0402965
ROHU_007132.TSS -399635	Intergenic	-0.882529	0.0109271	-0.875406	0.00634084	-0.814248	0.0198695	-0.643072	0.0463464
MVB12B.TSS -250300	Intergenic	1.36942	0.0109397	-0.225336	0.674358	0.727977	0.185839	-0.0738903	0.891012
NDUFA12.TSS +261	-exon (NDUFA12|AMEX60DD301008253.2, exon 2 of 5)	1.21345	0.0109466	-0.106214	0.820729	-0.0332101	0.948639	-0.222147	0.642901
EMP1.TSS +21416	-intron (EMP1|AMEX60DD102029166.1, intron 1 of 5)	-1.82772	0.0109467	-0.229478	0.690609	-0.418433	0.509691	-0.181377	0.755733
DR999_PMT14835.TSS +31473	-intron (DR999_PMT14835, intron 2 of 40)	1.33285	0.0109626	0.407611	0.424212	0.322639	0.561939	0.470614	0.361364
NOS1.TSS -598517	Intergenic	-1.12442	0.0109832	-0.952527	0.0213311	-0.136038	0.750853	-0.801901	0.0541754
GPR37.TSS +2250	-intron (GPR37|AMEX60DD201006259.1, intron 1 of 1)	1.04626	0.0109862	1.39577	0.000527184	1.36377	0.000923736	1.35754	0.000774236
LGR6.TSS -194731	-intron (LGR6|AMEX60DD201008623.1, intron 2 of 3)	1.43947	0.0109905	0.332016	0.547712	1.02153	0.0792738	0.950735	0.0836532
EOD39_9016.TSS +28837	#NAME?	-1.55179	0.0110098	-1.09839	0.0379361	-0.747576	0.194232	-0.9618	0.0725399
CNTNAP1.TSS +51087	-intron (CNTNAP1|AMEX60DD201010011.1, intron 1 of 8)	2.20578	0.011017	0.552391	0.52335	0.911592	0.313731	0.668105	0.442928
ATP2B3.TSS -180315		1.07917	0.0110457	0.798569	0.0518026	0.817323	0.0593542	0.754326	0.068479
SLC7A6.TSS -2497	Intergenic	1.00875	0.0110658	0.198538	0.60627	0.424557	0.303448	0.542356	0.160406
STPG4.TSS +393075	Intergenic	1.71523	0.0111055	0.621357	0.346949	0.673118	0.346942	1.24755	0.0579165
MAPK8IP2.TSS +50836	-intron (LOC115098963, intron 2 of 26)	-1.75987	0.0111224	-0.955069	0.114003	-1.49523	0.0288929	-1.34216	0.0305564
LMCD1.TSS +80114	-intron (LMCD1|AMEX60DD201023550.1, intron 1 of 5)	1.76146	0.0111241	0.0806826	0.907147	0.915912	0.204162	-0.180645	0.798316
RNF213.TSS +138260		-1.11036	0.0111532	0.0993802	0.802468	0.358932	0.385245	0.249784	0.531284
COL6A6.L.TSS -23758	Intergenic	1.71944	0.0111913	-0.27677	0.684278	0.496269	0.485511	-1.47733	0.0419527
ECEL1.TSS +96812	-intron (ECEL1|AMEX60DD201003066.1, intron 8 of 11)	1.79437	0.0111939	0.519843	0.457059	-0.20646	0.79222	0.182861	0.797599
CRYGB.TSS -421	-promoter-TSS (CRYGB-HOMER10)	-0.96196	0.0112093	-0.741237	0.0403036	-0.485622	0.197605	-0.532541	0.142144
SLC16A10.TSS +255629	-intron (SLC16A10|AMEX60DD201035020.2, intron 1 of 6)	-0.788881	0.011216	0.111847	0.703826	0.0169035	0.955907	0.122547	0.678367
NHE3.TSS +479	-intron (NHE3, intron 1 of 16)	1.0073	0.0112183	0.770744	0.0496348	0.833573	0.0372744	0.641463	0.103419
FLT1.TSS +530374	-intron (FLT1|AMEX60DD301049282.1, intron 25 of 29)	-1.68635	0.0112373	-1.23661	0.0314273	-0.738498	0.234074	-1.07286	0.0649173
SPSB4.TSS -688405	Intergenic	-1.725	0.0112422	-1.02713	0.0883276	-1.43172	0.033381	-1.29623	0.0351815
SHISAL2A.TSS -211314		1.36626	0.0112445	0.256985	0.625231	0.0186973	0.974535	0.104349	0.846055
WDR11.TSS +569445	Intergenic	1.54922	0.0112524	-0.187936	0.758078	-0.0392651	0.95259	-0.947627	0.137449
COL16A1.TSS -23353	-intron (COL16A1|AMEX60DD201006034.17, intron 4 of 70)	-1.88059	0.0112635	-0.753959	0.224607	-1.78694	0.0150992	-0.604646	0.334489
GRIA4.TSS -1356726	Intergenic	1.68592	0.0112659	0.49742	0.446658	0.345946	0.628861	0.891217	0.173493
PRPS2.TSS -318822	Intergenic	-0.834559	0.0112845	-0.982717	0.0013853	-0.549356	0.0941735	-0.492356	0.109007
SEMA6D.TSS -495131	Intergenic	1.28028	0.011294	0.559256	0.251915	0.188717	0.727027	0.290917	0.55962
CUNH16ORF96.TSS +66360	-intron (C8H16ORF96, intron 4 of 66)	2.075	0.0113457	0.211516	0.796496	-0.438303	0.628949	0.369258	0.654458
GOLGA3.TSS -20897	Intergenic	0.927755	0.0113505	1.1801	0.000700467	1.17869	0.00130554	1.18039	0.000761408
DPX16_23792.TSS -43705	Intergenic	-1.46731	0.0113561	0.482856	0.323227	0.330536	0.524497	0.101974	0.837129
TM4SF1.TSS +138274	Intergenic	1.59002	0.0113726	1.67362	0.00503966	1.40328	0.0278423	1.75309	0.0035192
HAPLN4.TSS +608348	-intron (HAPLN4, intron 9 of 10)	-1.53363	0.0113788	-1.19657	0.0278095	0.319386	0.564457	-0.815198	0.134915
MAMDC2.TSS +10428		1.51034	0.0113855	0.532222	0.360297	0.122172	0.850391	0.572313	0.330942
TMEFF1.TSS +5176	-intron (TMEFF1|AMEX60DD301039042.1, intron 1 of 9)	1.73732	0.0113981	0.619403	0.358754	0.610086	0.401425	0.699637	0.304251
ST18.TSS +325385	-intron (ST18|AMEX60DD201039692.1, intron 2 of 21)	-1.68942	0.0114099	-1.40608	0.0222066	-1.21278	0.0655065	-0.975668	0.112957
COL4A2.TSS -157254	-intron (COL4A1|AMEX60DD301047873.1, intron 1 of 51)	-1.11076	0.0114166	-0.023977	0.948581	-0.697028	0.100055	0.132809	0.72316
ATP8B4.TSS +642651	Intergenic	-1.10741	0.0114277	0.22739	0.570541	-0.162259	0.701741	-0.322164	0.427871
DR999_PMT07526.TSS -39058	Intergenic	1.35606	0.0114556	-0.0544527	0.918039	0.700769	0.209488	-0.115091	0.831058
CSF3R.TSS -338821	Intergenic	-1.59868	0.0114894	-0.839437	0.136076	0.295603	0.609418	-0.614314	0.278033
MIEN1.TSS -123440	Intergenic	-1.59607	0.0114967	-0.717304	0.208475	-0.17134	0.773068	-0.304443	0.593911
B930011P16RIK.TSS +72424	Intergenic	1.25427	0.0115013	0.299331	0.535818	0.858887	0.0923349	0.771241	0.110624
LRRC2.TSS -223529	Intergenic	1.52211	0.011502	0.824764	0.157741	0.977482	0.116494	0.785604	0.183638
RASGRP4.TSS +74031	-intron (RASGRP4, intron 1 of 15)	-1.16323	0.0115409	-0.617254	0.151237	-1.26514	0.00704779	-0.611919	0.157861
SPAG6.S.TSS +133096	Intergenic	1.24484	0.0115416	-0.225535	0.643228	0.110662	0.834238	-0.284494	0.567301
SLC26A4.TSS -120028	Intergenic	1.50826	0.0115441	0.439212	0.450625	0.432539	0.496689	0.391764	0.508157
GRIK3.TSS +79033	-intron (GRIK3|AMEX60DD201005893.1, intron 6 of 16)	1.03994	0.0115499	-0.606108	0.139473	-0.529421	0.233721	-0.215426	0.60017
GLI1.TSS +41078	-intron (GLI1|AMEX60DD201029758.1, intron 1 of 11)	-1.24418	0.0115648	-1.10764	0.0109068	-0.8498	0.0763291	-0.994387	0.0242726
ARHGAP4.TSS -55490		-1.25383	0.0115696	-0.785944	0.0848448	-1.35721	0.00738479	-0.957697	0.038467
DPX16_9724.TSS +416899	-intron (DPX16_9724, intron 8 of 11)	1.46414	0.0115775	0.584531	0.303656	0.624263	0.301977	0.750195	0.189283
NRXN2.TSS +70184	-intron (LOC100552752, intron 1 of 6)	0.992497	0.0115777	0.747833	0.0467264	0.569397	0.160209	0.666577	0.0796984
SLC45A1.TSS -71383	Intergenic	1.50181	0.0115814	0.864718	0.132663	-0.033153	0.959475	0.658178	0.260435
VMD2.TSS -97817	Intergenic	1.4449	0.0116006	0.401962	0.470694	0.176413	0.775454	0.347939	0.539425
KLF7.TSS -1351343	Intergenic	1.35181	0.0116102	0.892264	0.0849747	0.744156	0.180374	0.774359	0.139491
EOD39_13346.TSS -211877	Intergenic	1.23214	0.0116798	-0.274008	0.572543	0.368229	0.467594	-0.164266	0.737118
DMRTA2.TSS +12368		1.26851	0.011735	0.177157	0.719583	1.06052	0.0385651	-0.0252374	0.959962
NUDT18.TSS -156438	-exon (HR|AMEX60DD201002794.1, exon 19 of 19)	1.20511	0.0117354	0.190306	0.682227	0.904463	0.0647639	0.234571	0.618627
MRPL4.TSS -395813		1.45887	0.0117387	0.547799	0.335535	1.24554	0.0341122	0.42109	0.463986
LCK.TSS -160462	Intergenic	2.17313	0.0117435	-0.915344	0.29571	-0.0028544	0.997477	-0.683648	0.436981
GFRA1.TSS -257885	Intergenic	1.48138	0.0117768	-0.550852	0.352816	1.16807	0.051779	0.345658	0.554493
DR999_PMT14785.TSS -113861		1.65593	0.0117771	0.24309	0.710424	0.0135451	0.984268	0.0141817	0.98286
TMEM178B.TSS +445149	Intergenic	2.26375	0.0117877	0.367232	0.683206	0.421856	0.657766	0.242278	0.789933
GALNT16.TSS +61444	-intron (GALNT16|AMEX60DD103012106.2, intron 1 of 14)	-1.89111	0.0118053	-0.0954215	0.874422	0.0233045	0.971272	-0.430279	0.485137
ESAM.TSS -55330	Intergenic	-0.925365	0.0118074	-0.585091	0.0838664	-0.508983	0.161417	-0.170184	0.615573
AIF1L.TSS +28900	-intron (AIF1L|AMEX60DD201050391.1, intron 2 of 5)	0.849616	0.0118333	0.8201	0.0127191	0.330702	0.339207	0.885761	0.00734013
PAPSS2.TSS +2177	-intron (PAPSS2, intron 1 of 11)	0.580632	0.0118416	0.638138	0.00389239	0.783521	0.000712594	0.810193	0.000262798
PHYH.L.TSS +77	#NAME?	1.78643	0.01188	1.7855	0.00790874	2.32643	0.000837217	1.06897	0.122884
THAP5.TSS +216138	Intergenic	-1.53812	0.0119093	-1.4004	0.0120282	-0.881753	0.137933	-1.09409	0.0508394
SYN3.TSS -277813	Intergenic	1.80638	0.0119158	-0.434711	0.546838	-0.383663	0.612949	0.127225	0.859926
COLEC12.TSS +86826	-intron (COLEC12|AMEX60DD301039466.1, intron 7 of 8)	1.73795	0.0119167	0.773405	0.252486	0.99143	0.168284	1.20691	0.0743655
AB205_0030460.TSS -511	#NAME?	1.35407	0.0119168	0.668246	0.206369	0.896237	0.10334	0.586537	0.271001
PHACTR3.TSS -116297	Intergenic	0.889879	0.01192	0.147496	0.668817	-0.0348198	0.925576	0.165434	0.634533
THDL20.L.TSS -68105	Intergenic	-1.61716	0.0119552	-1.19067	0.0407745	-1.82172	0.00586283	-1.38254	0.0196967
COL13A1.TSS +45331	-intron (COL13A1, intron 1 of 2)	1.83288	0.0119591	1.29559	0.0665874	0.899041	0.240803	1.29207	0.0699229
SLCO4A1.TSS -342505	Intergenic	-1.76777	0.0120164	-1.04126	0.0770362	-0.810547	0.210548	-0.734633	0.2148
BAP1.TSS -357	-promoter-TSS (BAP1|AMEX60DD301024076.1)	-1.40798	0.0120325	-1.51706	0.00283222	-0.7205	0.182207	-0.846834	0.093264
CCDC186.TSS +250726	Intergenic	1.09009	0.0120479	0.480597	0.257946	0.818389	0.063997	0.508765	0.234107
SST.TSS +293812	Intergenic	0.874654	0.01205	0.12157	0.720835	0.104302	0.77394	0.397178	0.244706
GABRA1.TSS +49442	-intron (GABRA1|AMEX60DD201030298.1, intron 2 of 9)	-2.03892	0.0120575	-1.91214	0.0117905	-1.51973	0.0580889	-1.73067	0.0234986
CAVIN1.TSS +1687	-intron (CAVIN1|AMEX60DD201010031.1, intron 1 of 2)	1.11907	0.0121049	1.57314	0.000301431	1.63629	0.000232846	1.28233	0.00336983
CIB84_015861.TSS -277239		1.71072	0.012121	0.112418	0.868378	1.11592	0.112297	0.159306	0.816451
PLPPR2.TSS +20178		-1.65464	0.0121224	-1.06345	0.0878789	-1.42274	0.0314739	-0.944646	0.13118
PLPP4.TSS -547794	Intergenic	-1.02411	0.0121649	-0.909106	0.0154262	-0.449678	0.260527	-0.661647	0.0797116
ECSIT.TSS -29303	Intergenic	-1.81427	0.0121674	-0.585428	0.346042	-0.247737	0.706644	-0.147029	0.813087
OMD.TSS +99	-promoter-TSS (OMD|AMEX60DD301023966.1)	-1.0103	0.0121873	-1.09875	0.00298547	-1.04452	0.0105733	-1.0181	0.0066186
PEA15.TSS -52423	-intron (PEA15|AMEX60DD102016912.6, intron 2 of 5)	2.04566	0.0121882	0.0442886	0.956828	0.805435	0.339726	-0.0731966	0.929451
MAP4K1.TSS -42424	Intergenic	1.80996	0.0121966	-0.725861	0.325245	0.178791	0.818003	0.493331	0.494372
USHBP1.TSS +193	-exon (USHBP1, exon 1 of 16)	-0.673205	0.0122001	-0.178197	0.471236	-0.12038	0.648331	-0.158522	0.525346
FBN2.TSS +1415	-intron (FBN2|AMEX60DD201042923.1, intron 1 of 64)	-0.746631	0.0122039	0.112743	0.674403	0.0354898	0.901837	-0.0196319	0.942393
GLI2.TSS -100650	-intron (GLI2|AMEX60DD201056125.3, intron 2 of 13)	-1.53569	0.0122311	-1.27964	0.0183522	-0.80113	0.171198	-1.13938	0.0379522
VSTM2B.TSS -318125		-1.60635	0.0122388	-0.87743	0.102704	-1.3315	0.0323276	-0.264909	0.620476
LRP2.TSS +170829	-intron (LRP2|AMEX60DD201055628.1, intron 16 of 78)	-1.1849	0.0122529	-0.759211	0.0734055	-0.971032	0.0390708	-0.68869	0.108344
FAM166A.TSS -95472	Intergenic	1.2089	0.0123029	0.634315	0.177742	0.873316	0.0767931	0.44533	0.349629
DKK2.L.TSS +5533	-intron (DKK2.L, intron 4 of 55)	1.03067	0.012304	0.568031	0.149387	1.18258	0.00420071	1.14105	0.00370461
N/A.TSS -472239	Intergenic	1.2305	0.0123052	0.0528961	0.913292	0.0843681	0.87016	-0.203407	0.679747
PARPI_0009705.TSS -312993	Intergenic	1.13646	0.0123117	-0.341691	0.448569	-0.0689138	0.88549	-0.184576	0.684294
SMYD3.TSS -1401118	Intergenic	-1.07294	0.0123216	-0.313717	0.428692	-0.469843	0.264881	-0.345971	0.386505
UNC5D.TSS +321191	-intron (UNC5D|AMEX60DD201002483.1, intron 4 of 15)	1.08886	0.0123251	0.00155625	0.997086	0.232025	0.612023	0.283692	0.507518
DUI87_26249.TSS +29345		2.20465	0.0123553	-0.224671	0.800425	0.256205	0.783035	-0.0604976	0.94605
ADGRG6.TSS -274961		1.08523	0.0123608	0.0260592	0.951063	0.00135559	0.997658	0.0950838	0.824623
HERPUD1.TSS +99758	Intergenic	1.48659	0.0123646	0.522613	0.368246	1.53415	0.0104449	0.842725	0.148174
SMC2.L.TSS +1095955	Intergenic	1.34076	0.0124097	0.0019014	0.997133	-0.244321	0.676872	0.0883194	0.868853
FGD5.TSS +154855	-intron (FGD5|AMEX60DD201023482.1, intron 18 of 20)	-2.04504	0.0124123	-1.62252	0.0304254	-0.856084	0.272287	-2.07031	0.00699857
HECW2.TSS -7504	-intron (LOC103782501, intron 13 of 24)	-1.91415	0.0124124	-0.625452	0.323155	0.182103	0.783285	-0.664909	0.300583
NEDD9.TSS +117066	Intergenic	-1.66434	0.0124252	0.173908	0.757754	-0.746322	0.233259	-0.0698507	0.902623
KCNN3.TSS +163669	-intron (KCNN3, intron 3 of 7)	1.87713	0.0124932	0.48777	0.512612	1.13697	0.142968	0.990445	0.183489
URI1.TSS +454741		1.49835	0.0125462	-0.895826	0.141136	0.344549	0.58299	-0.0279411	0.963023
D9C73_028430.TSS -2056473	Intergenic	-1.81007	0.012579	-1.77239	0.00727815	-1.80477	0.0139305	-1.7123	0.0105437
DDC.TSS +2110	-intron (DDC|AMEX60DD201038234.1, intron 4 of 17)	1.62337	0.0126138	-0.224875	0.729934	-0.183418	0.795324	-1.27653	0.0640719
PLA2G1B.TSS +209	-intron (PLA2G1B-HOMER2, intron 1 of 3)	1.27801	0.0126184	-0.900898	0.0840918	-0.506855	0.376391	-0.511742	0.327585
MLPH.TSS +80508	-intron (MLPH, intron 2 of 14)	-2.11888	0.0126192	0.0765886	0.90775	0.168599	0.811117	-0.0577757	0.931257
N/A.TSS +75283	-intron (CASQ1, intron 10 of 46)	0.766268	0.0126213	0.304102	0.309936	0.259123	0.411981	0.287381	0.340735
H355_001747.TSS +140774	-intron (H355_001747, intron 3 of 20)	-1.15016	0.0126599	-0.971243	0.0201138	-0.136792	0.755138	-0.339206	0.414986
ARL4D.TSS +16640	Intergenic	1.62309	0.0126604	0.506578	0.429564	1.3073	0.0488302	0.157451	0.809582
ANKRD50.TSS -701113	Intergenic	-1.05117	0.0126693	-0.851006	0.0244062	-0.848058	0.042866	-0.81643	0.0334013
CHST7.TSS +186	-exon (CHST7|AMEX60DD201047771.2, exon 1 of 2)	-1.97464	0.0126893	-0.46201	0.505168	-0.259492	0.721145	-0.527091	0.45103
SBK2.TSS -183087		-1.06241	0.0127015	-0.928418	0.0142672	-0.501684	0.222379	-0.852425	0.0267045
CFTR.TSS +32855	-intron (CFTR-HOMER2, intron 1 of 11)	0.619031	0.0127062	1.00808	3.07e-05	0.829994	0.000865388	0.895231	0.000227146
FAM222B.TSS -291525	Intergenic	1.64386	0.0127158	0.377647	0.561547	0.681403	0.325623	0.102356	0.877541
SLITRK3.TSS +11772	Intergenic	1.48662	0.01275	0.18353	0.756193	0.439684	0.480727	-0.359316	0.552496
HTR1A.TSS -503707	Intergenic	-1.717	0.0127673	-1.68878	0.00726494	-0.520181	0.42454	-1.06563	0.0889443
NT5C2.TSS -250029	Intergenic	1.85528	0.0127772	0.250148	0.736074	0.599703	0.443832	-0.0785052	0.917329
DNAH12.TSS -207325	Intergenic	-1.09915	0.0128298	-0.674799	0.107183	-0.801688	0.0695433	-0.864835	0.0408058
BTK.TSS +402	-exon (BTK|AMEX60DD201037772.1, exon 1 of 10)	1.49664	0.0128579	0.908276	0.124272	0.706572	0.255265	0.622757	0.296608
STAC2.TSS -322887	Intergenic	0.807189	0.0128723	1.76875	1.47e-08	0.994784	0.00226406	1.19372	0.000148171
SGSH.TSS -248138		-1.60996	0.0128824	-2.08623	0.000471009	0.304418	0.605573	-1.40434	0.0175003
TNIP3.TSS -212767	Intergenic	-1.11209	0.0129085	-0.740168	0.0726694	-0.998354	0.0265839	-0.667963	0.108298
EXOC5.TSS -291037	Intergenic	-1.67424	0.0129109	-0.971833	0.103961	-0.738023	0.249315	-0.670228	0.264101
PARPI_0032991.TSS +20305		-1.67676	0.0129166	-1.2466	0.0376061	-1.30028	0.0497063	-1.12785	0.0627178
ARVCF.TSS -19834	-intron (ARVCF|AMEX60DD201000160.13, intron 1 of 16)	1.24923	0.012953	0.193878	0.694338	0.263931	0.618243	0.0176586	0.971894
CNN1.TSS -210697		1.10733	0.0129745	0.247947	0.568794	0.533222	0.247509	0.312847	0.476055
CHN1.TSS +71716	-intron (CHN1, intron 7 of 11)	1.512	0.0130241	1.29737	0.0291017	1.24037	0.0450575	1.51077	0.0112663
NRCAM.TSS -85996	-intron (DR999_PMT08288, intron 4 of 31)	-1.28836	0.0130259	-1.0277	0.0194049	-0.64553	0.182632	-0.968938	0.0308342
NCKIPSD.TSS -677003	Intergenic	1.96883	0.0130486	1.56489	0.0443669	1.53838	0.0569508	1.40582	0.0727658
RAI2.TSS -111473	Intergenic	1.56951	0.013061	0.723211	0.242729	0.400178	0.550607	0.914948	0.141468
MARCHF11.TSS +170	-promoter-TSS (MARCHF11|AMEX60DD102038904.2)	1.9246	0.0130643	0.84692	0.26778	1.5781	0.0458075	0.634236	0.41294
GLT1D1.TSS -169653	Intergenic	1.26489	0.0131024	0.113802	0.821113	0.0655637	0.902973	0.268486	0.595851
TMEM164.TSS +269040	-intron (TMEM164|AMEX60DD201037131.1, intron 3 of 4)	-1.63294	0.0131044	-0.765366	0.168857	-0.0548154	0.925767	-0.451451	0.41922
ADGRB3.TSS -557855	Intergenic	1.46656	0.0131228	0.202775	0.726864	0.0172651	0.978657	0.489951	0.40117
ARHGAP24.TSS +14979	-intron (ARHGAP24|AMEX60DD201043884.1, intron 1 of 7)	-1.52164	0.013141	-0.885233	0.0829001	-0.95341	0.0984605	-0.574393	0.263265
TOX.TSS +34550	-intron (TOX|AMEX60DD102039777.2, intron 1 of 8)	1.18226	0.0131463	-0.170389	0.71813	-0.277127	0.587496	-0.124133	0.794462
CORIN.TSS -862839		1.29676	0.0131685	-0.339112	0.514636	0.881405	0.101071	-0.157798	0.764605
FGF12.TSS -30491	-intron (FGF12, intron 1 of 16)	1.60359	0.0131772	0.0714428	0.911439	-0.113924	0.872062	0.408683	0.526005
CHRDL2.TSS +48277	-intron (CHRDL2|AMEX60DD201049819.2, intron 1 of 8)	-1.4032	0.0131896	-0.420755	0.371	-0.85277	0.111593	-1.05093	0.0327424
TMEM187.TSS -80372		1.46617	0.0131999	0.986165	0.0810692	0.860098	0.160751	0.904906	0.114768
KALRN.TSS +206727	-intron (KALRN|AMEX60DD201056078.10, intron 1 of 58)	1.62177	0.0132353	1.48434	0.020731	1.12488	0.0921874	1.19886	0.0634993
JAM3.TSS +389	-intron (JAM3|AMEX60DD301053518.2, intron 1 of 8)	-1.27246	0.0132372	-0.599467	0.219422	-0.562142	0.267301	-0.782706	0.11139
PARPI_0009075.TSS +97437	-intron (PARPI_0009075-HOMER5, intron 3 of 14)	-2.05484	0.0132524	-1.32196	0.0805999	-0.865024	0.274216	-1.29958	0.0885202
RNASEH1.S.TSS -16614	Intergenic	-0.968615	0.0132896	0.0598625	0.868961	-0.00982968	0.979359	-0.318341	0.385703
SPATA13.TSS +14504	-intron (SPATA13|AMEX60DD201049319.1, intron 2 of 12)	1.06236	0.0133484	0.679648	0.0978083	1.01097	0.02005	0.843052	0.0413996
FIBCD1.TSS +24436	-intron (FIBCD1|AMEX60DD201050378.1, intron 1 of 6)	-1.06704	0.0133492	-0.726449	0.0512423	-0.779632	0.0630856	-0.498291	0.185175
ACTRT3.TSS +159588	Intergenic	-1.90613	0.0133712	-0.755744	0.249726	-0.692563	0.329432	-0.415669	0.527991
CDH11.L.TSS +2548	-intron (CDH11|AMEX60DD301015334.7, intron 1 of 12)	-0.526003	0.0133872	-0.0356539	0.860254	0.0732034	0.728082	-0.115509	0.570966
NCKIPSD.TSS +110613	-intron (NCKIPSD, intron 1 of 10)	-1.83751	0.0134194	-0.591725	0.32545	-0.648248	0.330431	-0.1465	0.807779
ZNF521.TSS -666196	Intergenic	-0.947413	0.0134349	-1.18174	0.00107926	-0.864823	0.0253354	-0.826749	0.0225913
FGF8.TSS -943158	Intergenic	-1.28508	0.0134464	-1.09488	0.0219144	-0.557999	0.269416	-0.794827	0.0975983
CAMTA1.TSS +78041	-intron (CAMTA1, intron 6 of 33)	0.846199	0.0134505	0.268471	0.41186	0.43416	0.219309	0.340857	0.302983
ITGB6.TSS -501711	Intergenic	-1.14946	0.0134797	-0.670966	0.100739	-1.38553	0.00365184	-0.780423	0.0612924
EAF2.TSS +1001041	Intergenic	-1.17778	0.0134806	-1.06974	0.0170549	-0.642895	0.172274	-0.848366	0.0597542
PTF1A.TSS -139483	Intergenic	-1.46524	0.0135045	-0.992313	0.0596244	-1.20813	0.0396873	-0.634147	0.230169
NUDT3.TSS -2030	-intron (AMEX60DD201008746.7, intron 1 of 3)	1.6777	0.0135112	1.41734	0.0288501	1.06515	0.129658	1.23696	0.0601771
FAH.TSS +55	-promoter-TSS (FAH|AMEX60DD102004286.2)	0.897704	0.0135138	0.547999	0.115321	0.494412	0.186993	0.495123	0.159674
FAM43A.TSS -18857	Intergenic	-0.870791	0.0135381	-0.645169	0.0419679	-0.230143	0.499592	-0.371929	0.243801
PRRC2A.TSS -12099	Intergenic	1.76646	0.0135523	0.77304	0.271611	0.860245	0.249323	0.60278	0.397497
LTB.TSS -130326	Intergenic	-1.56738	0.0135801	-0.927613	0.104357	-1.13372	0.069564	-0.415494	0.466702
AGAP2.TSS -54839	Intergenic	1.54331	0.0135868	0.35176	0.566824	1.4276	0.0243842	0.409124	0.510173
JPH3.TSS -197017	Intergenic	-1.23449	0.0136379	-0.441511	0.31868	0.0413671	0.929486	-0.707857	0.116939
ZNF366.TSS +125491	-intron (ZNF366|AMEX60DD102042440.2, intron 5 of 5)	0.869824	0.013647	0.646287	0.060122	-0.0388855	0.915834	0.318578	0.358889
CACNG3.TSS +451747	Intergenic	-2.15764	0.0136898	-1.17177	0.123438	-0.698333	0.385141	-0.797381	0.295631
ARMH4.TSS +220171	-intron (ARMH4, intron 3 of 5)	1.83544	0.0137074	1.06293	0.14411	0.412402	0.606391	0.813774	0.270431
UAP1.TSS -83016	Intergenic	-1.44637	0.0137084	-1.59807	0.00225083	-0.483959	0.378096	-1.4466	0.00643618
FOXD3.TSS -655325		-0.981457	0.0137096	-1.37673	0.000174209	-1.16605	0.00420968	-1.61821	2.01e-05
PHLDB1.TSS -24926	-intron (PHLDB1|AMEX60DD201053877.14, intron 2 of 21)	1.21243	0.0137191	1.11419	0.0190656	1.3358	0.00694427	0.829036	0.0845486
BACE2.TSS -220657	Intergenic	-0.856253	0.0137459	-0.73891	0.0233695	-0.583081	0.0931393	-0.584249	0.0748984
DLX5.TSS +10351		1.77969	0.013791	0.625706	0.377101	2.06717	0.00417086	1.22629	0.0823321
MICAL1.TSS +36746	-intron (MICAL1, intron 1 of 232)	2.05721	0.013825	1.57672	0.054854	1.28822	0.13414	0.968398	0.244493
AV530_008533.TSS +995	-intron (AV530_008533, intron 1 of 2)	0.71612	0.0138272	0.801024	0.00344653	0.915927	0.00165587	0.821363	0.00296182
DUSP7.TSS -86246	Intergenic	1.41368	0.0138352	-0.637892	0.271923	-0.105384	0.866702	-0.292302	0.616149
CDX1.TSS +16146	-intron (CDX1-HOMER2, intron 1 of 2)	1.32303	0.0138461	-0.284066	0.595287	-0.183114	0.75248	-0.267025	0.622081
INSRR.TSS -28264	-intron (INSRR, intron 6 of 8)	-1.14567	0.0138528	-1.13324	0.00973531	-0.0333999	0.940838	-0.657947	0.133471
PARPI_0010972.TSS +20320	-intron (GIPC3|AMEX60DD301014349.1, intron 1 of 5)	-1.4365	0.0138592	-0.980816	0.0670362	-0.502816	0.371702	-0.615296	0.251675
FLRT3.TSS -797099	Intergenic	0.939943	0.0139028	0.077069	0.835444	0.0829468	0.837087	0.349276	0.348905
FOXE1.TSS +257619		1.01298	0.0139123	-0.149563	0.710498	0.416021	0.331561	0.409316	0.308414
SFMBT1.TSS +10078	-intron (SFMBT1|AMEX60DD201023653.1, intron 1 of 20)	-2.31925	0.0139189	-1.32373	0.117933	-0.628754	0.47323	-1.12468	0.186158
RPS19BP1.TSS -118682	Intergenic	-1.11057	0.0139434	-0.388581	0.297582	-0.0204435	0.959834	-0.565631	0.140797
GABRG2.TSS -39128	-intron (GABRG2, intron 12 of 18)	1.15107	0.0139441	0.022326	0.96125	0.117689	0.812415	0.322093	0.485151
H4C1.TSS +8564	-intron (LTK, intron 55 of 80)	1.02792	0.0139772	0.856414	0.0340679	0.718281	0.093046	0.91459	0.0244622
EFNA5.TSS +13142	-intron (EFNA5|AMEX60DD201042697.1, intron 1 of 3)	1.89459	0.0140136	1.36722	0.0670223	1.93726	0.0125891	0.943211	0.215618
PAX2.TSS +13200	-intron (LOC108697493, intron 5 of 7)	1.40797	0.0140141	1.5689	0.00350501	1.40478	0.0145417	1.56942	0.00381685
RPL37A.TSS +1148177		1.22856	0.0140162	1.14057	0.0151943	1.4872	0.00271979	1.25042	0.00831195
FIGNL2.TSS +312582	-intron (FIGNL2, intron 3 of 4)	-1.58272	0.0140177	-0.881322	0.119376	-1.18557	0.0601603	-0.807353	0.158187
E2I00_001173.TSS +63867	-intron (AMZ1|AMEX60DD201021166.1, intron 3 of 4)	-1.04716	0.0140276	-0.390027	0.33866	-0.53741	0.20468	-0.382866	0.34967
LAPTM4B.S.TSS -224539	Intergenic	1.72699	0.0140315	0.234651	0.737362	-0.0294024	0.968667	-0.0508647	0.942802
SGSM2.TSS -323879	-intron (SGSM2|AMEX60DD201054050.1, intron 2 of 23)	0.713236	0.0140508	0.890051	0.00140234	0.88786	0.002337	0.77732	0.00563668
CABIN1.TSS -109403	-intron (CABIN1|AMEX60DD201000404.1, intron 29 of 37)	-0.771974	0.0140524	-0.259804	0.37422	-0.306711	0.324184	-0.425807	0.149968
RAI2.TSS +89394	-intron (RAI2, intron 3 of 5)	-1.08993	0.0141	-0.169406	0.665291	0.16154	0.697098	0.133417	0.734257
D9C73_028119.TSS -198099	-intron (SLC25A21|AMEX60DD102012256.5, intron 3 of 9)	1.10259	0.014118	1.18853	0.00630556	0.692076	0.132661	0.857945	0.0507839
FHOD3.TSS -328272	Intergenic	1.09949	0.0141348	0.515154	0.240004	0.654612	0.153524	0.496585	0.260715
S1PR2.TSS -205361		1.67935	0.0141536	1.23031	0.0625577	1.5316	0.0274805	1.09505	0.101652
CDCA7L.TSS -395535	Intergenic	-1.54948	0.0141588	-0.991649	0.0852593	-0.545776	0.367879	-0.81219	0.161214
MED9.TSS -515840		1.4697	0.0141593	-0.315594	0.59826	0.22005	0.731012	0.253391	0.671252
SPSB4.TSS +895	-intron (SPSB4|AMEX60DD103002746.3, intron 1 of 2)	-1.05533	0.0141955	0.376839	0.334673	0.221442	0.58892	0.501934	0.200575
DR999_PMT00087.TSS +218397	Intergenic	2.20471	0.0142255	0.470806	0.600296	1.18713	0.196868	0.396337	0.661319
KIRREL3.TSS +159091	-intron (KIRREL3|AMEX60DD201053618.1, intron 10 of 11)	-1.26251	0.0142324	-0.759357	0.0979132	-0.694836	0.164656	-0.856533	0.0664121
TNS3.TSS -181076	-intron (LOC112109441, intron 16 of 188)	-1.40257	0.0142412	-0.291941	0.583883	-0.162051	0.769079	-0.493893	0.357735
TTC29.TSS -170753	Intergenic	-1.74881	0.0142456	-2.2134	0.001123	-1.14632	0.103081	-1.89301	0.00551993
PLEKHS1.TSS -8968	Intergenic	1.72528	0.0142679	0.403039	0.562841	1.23781	0.0862658	0.546189	0.436197
CUNH3ORF70.TSS -123317	Intergenic	1.20302	0.0142851	0.497823	0.297539	1.29169	0.00899896	0.444062	0.358014
TIMM21.TSS +297741	Intergenic	-1.64145	0.0142862	-0.873872	0.123802	-0.54791	0.373665	-0.679308	0.235789
BBS7.TSS -138358	Intergenic	0.962342	0.0143362	0.0251438	0.947756	0.573905	0.155083	0.0187652	0.961451
NOX1.TSS -7580	Intergenic	-1.53903	0.0143427	-0.781121	0.176869	-1.69411	0.00847741	-1.06071	0.0703818
SLC20A1.TSS +126056	-intron (SLC20A1|AMEX60DD103001301.2, intron 1 of 11)	1.56008	0.0143589	0.00252266	0.996818	0.599596	0.371807	0.531407	0.399927
EGLN3.TSS -368104	Intergenic	0.819582	0.0143836	1.12784	0.000525447	0.895625	0.00789081	1.08596	0.000884325
IGFBP2.TSS +1359	-exon (IGFBP2|AMEX60DD201056215.1, exon 1 of 4)	-0.811489	0.0144058	-0.442368	0.153469	-0.179065	0.582881	-1.05853	0.000851275
NCKIPSD.TSS -662620	Intergenic	1.33709	0.014419	0.726635	0.172102	1.4242	0.00964862	0.892151	0.095379
PTH2R.S.TSS -303623	Intergenic	1.33767	0.0144433	0.169992	0.750257	-0.158477	0.792298	0.342821	0.524985
PRRT3.TSS +29149	-intron (PRRT3|AMEX60DD201023243.1, intron 1 of 3)	1.18323	0.0144601	-0.932914	0.0574542	-0.426515	0.425261	-0.876929	0.0800492
NDUFB6.TSS -318508		1.75647	0.0144712	0.274234	0.700175	1.9419	0.00705252	0.755118	0.288827
TBC1D15.TSS +530132	Intergenic	1.10415	0.0145619	-0.373617	0.405666	-0.161472	0.733608	-0.276281	0.541405
JPH4.TSS +196589	-intron (JPH4|AMEX60DD201009508.1, intron 5 of 5)	1.40942	0.0146055	1.29437	0.017956	1.45994	0.011783	1.17563	0.033912
EBF2.TSS +94824	-intron (EBF2|AMEX60DD102002999.3, intron 6 of 16)	1.26962	0.0146257	0.273801	0.591511	0.717114	0.181009	0.345714	0.501624
TTC29.TSS -1108568	Intergenic	-1.27191	0.0146305	-1.32433	0.00693636	-0.608267	0.23453	-0.915389	0.0624133
PAPSS2.TSS -545779	Intergenic	-0.797377	0.0146712	-0.95099	0.00163511	-0.750943	0.0226775	-0.760523	0.0125444
NLRC4.TSS +492	-intron (NLRC4|AMEX60DD201035246.1, intron 1 of 4)	-1.58426	0.0146959	-1.31341	0.0206751	0.142408	0.806845	-1.11005	0.0528807
PARPI_0017627.TSS -32222		-1.63199	0.0146999	-1.42816	0.0186617	-1.43245	0.0319608	-1.37492	0.0253348
THSD4.TSS +35581	-intron (THSD4|AMEX60DD301003786.1, intron 1 of 6)	1.57428	0.0147268	1.18358	0.056127	0.79333	0.240233	1.32471	0.0337208
IL11.TSS +45539		0.856671	0.0147497	0.00476914	0.988852	0.106609	0.772312	0.280768	0.412953
GABARAPL1.TSS -15593	Intergenic	1.61033	0.0147815	0.0398779	0.951528	1.31802	0.0506729	0.661201	0.311264
NTN1.TSS +149051		-0.897675	0.0147832	-0.232717	0.493584	-0.0725591	0.839449	-0.338838	0.323759
USP2.TSS -17785	-intron (USP2, intron 1 of 3)	1.95119	0.0147918	2.13949	0.00502827	2.26515	0.00444184	1.98446	0.00997284
PDZRN3.TSS +466612	Intergenic	1.47179	0.014825	0.821669	0.160213	-0.101924	0.877902	0.366789	0.540451
SCN4A.TSS +350440	-intron (SCN4A-HOMER2, intron 6 of 20)	1.44085	0.0148467	0.0289804	0.960573	0.539845	0.38114	-0.375561	0.531242
SF3B5.TSS -99258	Intergenic	1.3372	0.0148493	-0.237739	0.662373	-0.356358	0.56178	0.346487	0.521738
LPAR1.TSS -371909	Intergenic	1.3457	0.0148588	0.473896	0.383625	0.576805	0.311987	0.229812	0.676106
SAMHD1.TSS +43377	-intron (SAMHD1, intron 2 of 32)	1.60984	0.0148627	1.7617	0.00466385	1.09279	0.107417	1.60854	0.0107246
LAMC1.TSS -51464	Intergenic	1.73932	0.0148635	-0.367051	0.609959	0.068057	0.929529	0.210073	0.769686
TMEM268.TSS -6178	Intergenic	1.42556	0.0148649	1.03273	0.0652907	0.614296	0.317684	0.79918	0.161014
ADAM12.TSS +78049	-intron (ADAM12|AMEX60DD301052756.1, intron 1 of 19)	1.72824	0.0148959	-0.229122	0.747536	0.515983	0.48678	-0.0489759	0.945508
ANKRD9.TSS +164529	Intergenic	1.93505	0.0149049	-0.711687	0.373273	0.912294	0.25664	-0.661579	0.410045
XELAEV_18022447MG.TSS -185219		1.90286	0.0149424	0.183327	0.814307	0.681208	0.40494	-0.0503849	0.949342
A6R68_11525.TSS +955401	Intergenic	1.18681	0.0149424	0.386741	0.417573	0.956762	0.053858	0.78987	0.0982446
DR999_PMT14912.TSS +24497	-intron (DR999_PMT14912, intron 1 of 1)	1.51688	0.0149442	1.20271	0.042744	0.306601	0.647036	0.950608	0.115989
TNS3.TSS +33247	-intron (LOC112109441, intron 1 of 188)	0.968823	0.0149548	0.74005	0.0570981	0.281698	0.492595	0.738728	0.0587824
ATP1A1.TSS +52020	-intron (ATP1A1, intron 1 of 11)	0.79683	0.0149555	1.21883	0.000117074	0.990223	0.00258943	0.924711	0.00370842
PUDP.TSS +1314435	Intergenic	-1.47129	0.0149774	-0.867137	0.0891051	-1.84326	0.00309169	-0.569088	0.267424
TOGARAM2.TSS -8674	-intron (TOGARAM2|AMEX60DD201036312.3, intron 15 of 19)	-1.39841	0.0149875	-1.1148	0.0260008	-1.75629	0.00312419	-0.430003	0.3867
NXPH1.TSS -168618		1.23021	0.0149942	0.0933022	0.85044	0.312649	0.558714	-0.00607733	0.990377
UBA52.TSS -407384	Intergenic	1.65809	0.0149957	1.45376	0.0253704	0.999493	0.157669	1.88507	0.00376417
MFSD2B.TSS +6087	-intron (MFSD2B|AMEX60DD201032233.1, intron 1 of 3)	1.36787	0.0150216	0.869633	0.105547	1.4019	0.0131625	1.05446	0.0513429
ESYT3.TSS +76055	-intron (ESYT3|AMEX60DD201056039.1, intron 1 of 22)	-1.70848	0.0150336	-1.48223	0.0206494	-0.237251	0.718561	-2.12112	0.0014358
PTPRU.TSS +11060	-intron (PTPRU|AMEX60DD201005483.1, intron 1 of 29)	1.37998	0.0150391	0.656679	0.233368	1.03556	0.0749592	0.276099	0.623921
FNDC1.TSS -202074	-intron (FNDC1|AMEX60DD301034289.1, intron 6 of 13)	1.09774	0.015062	-0.0433488	0.921923	0.0638378	0.894304	0.41625	0.346744
COBL.TSS -58956	Intergenic	0.940747	0.0150776	0.516317	0.168559	0.241451	0.549191	0.33207	0.381586
RPH3A.TSS -547415	Intergenic	-1.41792	0.0150913	-0.977758	0.052088	-0.466126	0.390789	-0.491174	0.328716
SYN3.TSS +363873	-intron (SYN3|AMEX60DD201007065.1, intron 2 of 13)	-1.72326	0.0150966	-0.471357	0.418231	-0.866283	0.186559	-0.616308	0.299199
CHN2.TSS -58923		1.86261	0.0151376	0.463166	0.544716	0.890656	0.252911	0.723289	0.344933
LRRN2.TSS -105798	-intron (LRRN2|AMEX60DD201009066.1, intron 1 of 2)	1.72379	0.0151421	1.809	0.00729908	2.15173	0.00220061	1.47613	0.0310924
SNTN.TSS -1330	Intergenic	-0.685847	0.0151488	-1.09846	5.47e-05	-0.70402	0.013841	-0.949582	0.000528194
FREM2.TSS +360296	-intron (FREM2|AMEX60DD201049164.1, intron 2 of 23)	1.33424	0.0152293	0.603032	0.255884	-0.379142	0.537256	-0.439706	0.434185
TEKT3.TSS -383459	Intergenic	1.43372	0.0152534	0.284088	0.623513	-0.530776	0.427653	0.108801	0.853884
ALB.TSS -322	-promoter-TSS (ALB|AMEX60DD103044372.3)	0.739715	0.0152607	0.215684	0.463494	0.375014	0.231556	0.232468	0.433983
PDE2A.TSS +59350	-intron (PDE2A|AMEX60DD201049847.1, intron 1 of 29)	1.52511	0.0152832	-0.077121	0.901813	0.138351	0.838225	0.467059	0.453947
TMEM92.TSS -92165	Intergenic	1.15462	0.0153204	0.320817	0.485802	1.09992	0.0225042	0.259317	0.579387
GTSE1.TSS -442410	Intergenic	-1.74197	0.0153321	-1.20314	0.0473784	0.102805	0.869848	-0.677417	0.262973
MTHFS.TSS -791351	Intergenic	1.3606	0.0153656	0.989893	0.0675983	0.109468	0.85612	0.965176	0.0774629
CFAP77.TSS -103125	-intron (CFAP77|AMEX60DD301050430.1, intron 3 of 5)	1.45272	0.0153664	1.17278	0.0475371	0.672914	0.271663	0.696836	0.242099
NRXN1.TSS +116480	-intron (NRXN1|AMEX60DD201035868.1, intron 3 of 3)	-1.33241	0.0153776	-1.1147	0.0283347	-0.428344	0.420419	-0.656173	0.197041
GLYATL3.TSS -29		-1.19792	0.0153826	-0.679387	0.140976	-0.904722	0.0668788	-0.730576	0.116539
NHSL2.TSS +65697		-1.2465	0.0154184	-0.94679	0.0350291	-0.366544	0.447867	-0.966673	0.0348748
KCNQ1.TSS -322537	Intergenic	1.13693	0.0154252	0.235709	0.607001	0.979792	0.0400201	0.628053	0.171277
SLC6A8.TSS +57300		1.25044	0.0154605	0.856366	0.0858103	0.655913	0.220733	0.701749	0.164344
ROHU_037325.TSS +349783	Intergenic	1.68433	0.0154732	1.03701	0.122162	1.45391	0.03988	1.53213	0.0222691
ACMSD.TSS -308826	-exon (TMEM163|AMEX60DD102055974.1, exon 7 of 7)	-1.52863	0.0154788	-1.44545	0.0128978	-0.536502	0.375906	-0.925097	0.111154
FAU.TSS -275887	Intergenic	1.68517	0.0155321	2.48143	0.000190604	1.91522	0.00602869	0.961181	0.160018
NPR1.TSS -173028	Intergenic	-1.38382	0.0155321	-0.968484	0.0485451	-0.826102	0.129615	-0.847766	0.0885999
CLU.TSS +1527	-intron (CLU|AMEX60DD201032706.1, intron 1 of 8)	-0.82187	0.0155382	-1.3086	3.96e-05	-0.19916	0.548308	-1.27295	8.4e-05
ALDH1A3.TSS +18284	-intron (ALDH1A3, intron 1 of 12)	1.5972	0.0155482	1.53709	0.0169509	0.778449	0.255299	1.51169	0.0194355
NTM.TSS +50788	-intron (LOC111165522, intron 2 of 4)	0.748835	0.0155817	0.61065	0.0380556	0.671905	0.0324897	0.64247	0.0305735
MSMP.TSS -215817	Intergenic	-1.00463	0.0155857	-0.770518	0.0421101	-0.866347	0.0375203	-0.534983	0.160788
PHLDB1.TSS -2874	-intron (PHLDB1|AMEX60DD201053877.14, intron 2 of 21)	1.20626	0.0155857	1.51247	0.00141008	1.56572	0.0016224	1.27037	0.00799476
FADS2.TSS +95740	-intron (FADS2|AMEX60DD201004588.1, intron 4 of 11)	1.27486	0.0155894	0.990425	0.0510029	1.70769	0.0011287	0.848002	0.0985902
C6H1ORF53.TSS -330067	Intergenic	1.784	0.0155957	0.121088	0.869244	0.131825	0.867621	-0.45222	0.54988
RHBDL1.TSS -111240		-1.34769	0.0156274	-0.707112	0.188704	-0.659819	0.232495	-0.607802	0.25984
DPX16_20168.TSS +609720	Intergenic	-1.69055	0.0156318	-1.35593	0.0356483	-0.351129	0.597551	-1.49547	0.0223448
PRLH.TSS -117531	Intergenic	1.19439	0.0156384	0.170359	0.722398	0.333434	0.52312	0.14277	0.769875
PLXNA4.TSS -1315374	Intergenic	-1.90688	0.0156561	-0.868285	0.22117	-1.37132	0.0761891	-1.13361	0.115146
KALRN.TSS +313013	-intron (KALRN|AMEX60DD201056078.10, intron 1 of 58)	1.70699	0.0156807	1.99873	0.00273128	1.31841	0.0677117	1.91285	0.00449259
COMP.TSS +866	-intron (COMP, intron 1 of 17)	-1.1218	0.0156961	-0.374252	0.397582	-0.551556	0.230958	-0.436341	0.326436
SPR.TSS -24114		1.56293	0.0156993	0.443943	0.485603	0.176192	0.799541	0.149898	0.817197
KCP.TSS +535107	Intergenic	1.07753	0.0157024	-0.462821	0.294748	0.298208	0.524968	0.151533	0.729973
CD101.TSS +365506	Intergenic	0.696189	0.0157045	0.711518	0.0109797	0.520968	0.0749892	0.511946	0.0693178
GALNT18.TSS +109704	-intron (GALNT18|AMEX60DD102004821.4, intron 1 of 10)	-1.68281	0.0157083	-1.08775	0.087189	0.123418	0.849387	-1.22282	0.0577122
GPR132.TSS -463073	Intergenic	-1.48995	0.0157389	-0.194794	0.726603	-0.455423	0.441221	-0.0702489	0.900121
TNXB.TSS -202188	Intergenic	1.23577	0.0157652	1.33071	0.00519544	1.59336	0.00152663	1.65087	0.0005461
ADORA1.TSS +8027	-intron (ADORA1|AMEX60DD201008551.1, intron 1 of 1)	1.69392	0.0157709	-0.366692	0.603784	-0.17075	0.824148	0.187396	0.790341
N/A.TSS +432246	Intergenic	1.15441	0.0157957	0.335211	0.471458	0.55606	0.262444	0.376226	0.423622
NRXN3.TSS -1434868	Intergenic	0.922794	0.0158165	0.686963	0.0634136	0.573688	0.142946	0.715636	0.0547097
ROHU_037325.TSS +540217	Intergenic	1.98584	0.015818	0.582115	0.475599	0.664538	0.44593	0.895861	0.273787
XELAEV_18005457MG.TSS -334515	Intergenic	-1.173	0.0158244	-0.587103	0.174359	-0.215181	0.640977	-0.202431	0.640282
POFUT2.TSS +268377	Intergenic	1.37114	0.0158396	0.175256	0.752573	0.498871	0.405304	0.825653	0.135112
GPRC5B.TSS -58060	-intron (GPRC5B|AMEX60DD301020622.1, intron 1 of 3)	1.68009	0.0158499	0.37852	0.582354	0.799525	0.271002	0.551187	0.426321
MCIDAS.TSS +137470	Intergenic	-0.971378	0.0158509	-0.1063	0.771741	-0.783933	0.0518427	-0.476628	0.200645
TIE1.TSS +154642		0.995587	0.0158553	0.732333	0.063608	0.24288	0.575299	0.766561	0.0543154
TESC.TSS +112349	-intron (TESC|AMEX60DD301001079.1, intron 1 of 6)	1.80563	0.0158882	-0.632573	0.402856	0.397691	0.609579	-0.380355	0.616642
SCUBE3.TSS +69122	-intron (SCUBE3|AMEX60DD301008773.1, intron 1 of 22)	1.40815	0.0159177	0.591102	0.298508	0.850542	0.159201	0.85948	0.132319
FRMD4A.TSS +15098	-intron (AMEX60DD201006313.1, intron 1 of 1)	1.70783	0.0159181	-0.193852	0.784963	0.576528	0.440365	0.493309	0.484898
GSONMT00027580001.TSS +201711	Intergenic	1.13515	0.0159195	0.927003	0.0379579	0.759547	0.116612	0.475369	0.299177
ZBTB20.TSS +88724	-intron (ZBTB20|AMEX60DD201046990.1, intron 3 of 8)	1.30461	0.0159668	0.105722	0.842635	0.100473	0.862049	0.261667	0.625914
ADARB2.TSS +143785	-intron (ADARB2|AMEX60DD201021699.1, intron 2 of 9)	-1.68053	0.0159695	-1.84756	0.00545333	-2.05621	0.00433424	-1.56985	0.0186597
NETO1.TSS -429630	Intergenic	-0.819571	0.0159843	-0.801506	0.0101641	-0.747101	0.0290608	-0.555766	0.076672
PLXDC1.TSS +2053	-intron (PLXDC1|AMEX60DD301010273.1, intron 1 of 13)	0.744917	0.0160089	0.934569	0.00162829	0.885432	0.00441416	0.77004	0.010049
CRYBA2.TSS -5498	Intergenic	1.44166	0.0160125	0.286826	0.624594	-0.322453	0.629141	0.563906	0.33856
SAMHD1.TSS +41259	-intron (SAMHD1, intron 2 of 32)	1.0835	0.0160209	1.2543	0.00313222	0.937846	0.040293	1.1957	0.00528798
ORF2P.TSS -482060		0.956454	0.0160609	-0.747932	0.0589645	-0.545853	0.212364	-0.351237	0.37618
TMPO.TSS -372168	Intergenic	2.7437	0.0161145	-0.0937046	0.934895	1.91198	0.0961049	-0.949942	0.415894
TMEM100.TSS +915197		-1.82485	0.0161254	-1.55317	0.0252375	-0.972866	0.183863	-1.55301	0.0271031
LINC02210-CRHR1.TSS +61679	-intron (AB205_0015600, intron 11 of 13)	-1.35907	0.0161254	-0.742498	0.148144	-0.33516	0.535443	-0.585056	0.257596
CCND2.TSS +732	-intron (CCND2|AMEX60DD201006581.1, intron 2 of 4)	0.97754	0.0161382	0.368398	0.343475	1.04958	0.0102441	0.778993	0.045455
TRIM36.TSS +145	-exon (TRIM36|AMEX60DD201042779.1, exon 1 of 10)	0.655215	0.0161536	0.599348	0.0213518	0.878429	0.00129276	0.550839	0.0360575
KCNJ5.TSS +102383	-intron (KCNJ5|AMEX60DD201053593.1, intron 2 of 2)	-1.59716	0.0161945	0.154298	0.756857	0.301383	0.578304	-0.583263	0.265961
E1301_TTI023775.TSS -17960	-intron (LOC105012922, intron 6 of 17)	-1.13393	0.0162007	-0.679134	0.102451	-0.588546	0.196859	-0.789575	0.0626688
GCH1.TSS +780	-intron (EGM_16646, intron 1 of 6)	0.87454	0.0162272	0.513889	0.133656	0.560699	0.132258	0.65035	0.0601351
UBE2L3.TSS -172090	Intergenic	1.58879	0.0162732	0.461631	0.476049	1.04133	0.127537	0.661122	0.310907
ASZ78_005489.TSS -9869	Intergenic	1.02465	0.0162763	0.976442	0.0185746	1.21314	0.00459628	1.03289	0.0131611
ARTN.TSS -140850		-0.649377	0.016323	0.208633	0.400914	-0.097627	0.71355	-0.0708165	0.778307
DISP1.TSS +197368	Intergenic	-1.54618	0.0163301	0.156943	0.735879	0.213962	0.675747	-0.347953	0.474895
MGAT5B.TSS -177912	-intron (MGAT5B|AMEX60DD201030769.1, intron 8 of 16)	-0.872142	0.0163327	-0.658738	0.0520206	-0.29837	0.404052	-0.592431	0.0831372
CAV2.TSS +51228	-exon (CAV2|AMEX60DD201006318.1, exon 3 of 3)	-1.63034	0.0163438	0.453908	0.369333	-0.0864486	0.879063	-0.58879	0.271813
GPR149.TSS +9604	-intron (GPR149|AMEX60DD201001874.1, intron 2 of 5)	1.49553	0.0163728	-0.335614	0.590132	0.260003	0.684695	-0.315514	0.614603
GSONMT00027580001.TSS +213692	Intergenic	1.77966	0.0163804	0.253564	0.731295	0.817974	0.284267	0.522503	0.480521
N/A.TSS -81358	-intron (AMEX60DD201010962.3, intron 3 of 4)	1.85391	0.0163838	1.61384	0.0313224	1.62518	0.0385232	1.56247	0.0384995
GRIFIN.TSS -227422	Intergenic	-1.74004	0.0163876	-0.610391	0.328369	0.0675883	0.917551	-0.626828	0.321165
PTPN11.TSS -35927	Intergenic	-1.79012	0.0163998	-0.52533	0.423992	-0.985896	0.168365	-0.631625	0.341556
SH3BGRL.L.TSS -19340	-intron (LOC109300650, intron 1 of 13)	1.41042	0.0164182	0.369137	0.520672	0.364968	0.558695	0.612816	0.289015
CRIP2.TSS -513	-promoter-TSS (CRIP2|AMEX60DD102012001.3)	-1.29737	0.0164396	-0.208253	0.639118	-0.339827	0.491447	-1.15932	0.014377
PDE6G.TSS -1180		1.50729	0.0164491	0.890986	0.140146	0.174061	0.798306	0.782839	0.202083
ROHU_037172.TSS -124462	Intergenic	-1.57428	0.0164619	-1.43358	0.0182698	-1.57852	0.0177269	-1.36418	0.026188
SLC12A1.TSS +430435	Intergenic	1.53036	0.0165454	0.547867	0.380324	0.662854	0.322318	0.0336142	0.958263
RASL10A.TSS +1473	-intron (RASL10A, intron 3 of 8)	-1.39186	0.0165499	-1.42322	0.00840381	-0.877407	0.125019	-1.10576	0.0414145
C8B.TSS +1092		-1.26739	0.0165626	-1.11343	0.0262825	-0.844496	0.108381	-0.666825	0.18356
N/A.TSS +51502	-intron (LOC104917033, intron 1 of 3)	1.78899	0.0166021	0.0116115	0.987587	0.79941	0.302691	-0.715619	0.354269
EIF2B2.TSS -286154	Intergenic	-0.742376	0.0166316	-0.545102	0.0594004	-0.0549125	0.856451	-0.231183	0.425492
WIPF1.TSS +111620	-intron (WIPF1|AMEX60DD201055626.4, intron 2 of 4)	-1.31226	0.0166344	-1.11836	0.0232539	-0.0589929	0.90842	-0.342648	0.483287
XICL.TSS -92470		1.1119	0.0166681	1.01494	0.020023	0.28453	0.561334	0.89842	0.0425666
PLXDC2.TSS -139441		-1.5011	0.0167238	-2.18999	0.000247758	-1.33681	0.0339395	-1.87395	0.00180945
CACNG1.TSS -6818		-1.58417	0.0167335	-1.54796	0.0103473	-0.889241	0.16555	-1.34749	0.0269014
DDX1.TSS -566321	Intergenic	-0.914264	0.0167467	0.46338	0.21029	0.736872	0.0489222	0.788874	0.0330445
B4GALT1.TSS +309618	-intron (B4GALT1, intron 4 of 5)	1.63826	0.0167491	0.515054	0.44203	1.2099	0.0855409	0.497038	0.464823
N/A.TSS +5213	-intron (N/A|AMEX60DD201000395.1, intron 1 of 4)	1.01904	0.0167559	0.107179	0.795838	0.218911	0.625084	-0.0227357	0.95698
RB1CC1.TSS +1187439	Intergenic	-1.29328	0.0167562	-1.25023	0.0124855	-0.799228	0.133378	-0.776101	0.121007
NGF.TSS +2443	-intron (NGF|AMEX60DD102008715.3, intron 1 of 3)	-1.3675	0.0167679	-1.13857	0.0234128	-0.143654	0.78533	-1.23126	0.0166659
SLC26A2.TSS -317361	Intergenic	1.40661	0.0167791	0.200098	0.729949	0.565736	0.356626	0.0996265	0.8654
ZSWIM6.TSS +712	-exon (AMEX60DD301042202.3, exon 1 of 2)	-1.77596	0.0168157	-0.47287	0.480895	-0.222245	0.750225	-1.12361	0.100157
PLPPR1.TSS -19615	-intron (PLPPR1|AMEX60DD201044394.1, intron 2 of 8)	-1.30923	0.0168289	-0.992462	0.0318319	-0.520612	0.302996	-0.779918	0.0953981
AB205_0081210.TSS -81692	Intergenic	1.90744	0.0168553	0.0252412	0.974805	0.318799	0.706915	0.607634	0.446236
OVCA2.TSS -255262	Intergenic	0.686857	0.0168762	0.814959	0.00293566	0.890093	0.00202047	0.716251	0.00958655
CELF6.TSS -82894	Intergenic	-1.43489	0.0168931	-1.26727	0.0226289	-0.694034	0.235483	-0.789764	0.15546
MAGI2.TSS +71665	-intron (MAGI2.S, intron 14 of 16)	0.894981	0.0169169	0.606936	0.0969687	0.322406	0.40271	0.414594	0.260759
RYR2.TSS +103056	-intron (RYR2|AMEX60DD201035296.1, intron 5 of 45)	1.25317	0.0169283	0.0390369	0.939698	-0.594697	0.30987	0.0988069	0.849802
ABRA.TSS -341	#NAME?	0.804833	0.0169323	0.531629	0.101407	0.96104	0.00454691	0.459009	0.161371
XDH.TSS +221	-intron (XDH|AMEX60DD201036246.1, intron 1 of 35)	-1.55965	0.0169459	-1.91484	0.0014651	-1.03063	0.106127	-1.21907	0.0411019
DR999_PMT02787.TSS +143019	-intron (MORN1|AMEX60DD103051333.3, intron 4 of 13)	-1.42221	0.0169856	-0.760148	0.132875	-1.58432	0.00856937	-0.810204	0.116302
NANS.TSS +570	-intron (AMEX60DD301044109.2, intron 1 of 1)	-1.13228	0.0169888	-0.658455	0.13153	-0.774142	0.100203	-0.365274	0.404478
RTL1.TSS -78099	-intron (DR999_PMT00183, intron 6 of 6)	-2.09981	0.0170133	0.529297	0.43698	-0.49009	0.518873	0.13368	0.846757
SV2C.TSS -22033	Intergenic	-1.04177	0.01706	-0.789174	0.0486129	-0.848716	0.0520264	-0.980359	0.0161646
DR999_PMT07106.TSS -215	#NAME?	-0.888544	0.0170773	0.0270016	0.938008	-0.0665167	0.855037	-0.0706721	0.839828
DLG4.TSS +676	-intron (DLG4|AMEX60DD201012965.1, intron 1 of 22)	0.764106	0.0170946	0.952315	0.00197136	0.925412	0.0040536	0.643006	0.038683
N310_13420.TSS -142395	-intron (AMEX60DD201053529.1, intron 1 of 1)	0.855056	0.0171231	0.718363	0.0364174	0.63237	0.0842635	0.252383	0.470926
PRDM9.TSS +24622		0.981393	0.0171485	-0.158829	0.692069	0.208248	0.63117	0.0723936	0.857881
HAPLN4.TSS +225914	-intron (HAPLN4, intron 2 of 10)	1.2092	0.0171602	0.934056	0.0546466	0.325356	0.543864	0.586749	0.235933
ST8SIA4.TSS -70524	-intron (ST8SIA4|AMEX60DD201042660.3, intron 3 of 3)	1.666	0.0171609	1.09957	0.103044	1.3563	0.0575506	1.48174	0.0282991
CXXC4.TSS -2762887	Intergenic	-0.818052	0.0171873	-0.374662	0.239937	-0.559308	0.103053	-0.509616	0.114182
SLC36A4.TSS +545764	Intergenic	-1.05238	0.0172064	-1.23387	0.0037985	-0.770369	0.0815812	-1.1232	0.00877833
SOX9.TSS -1673218		1.18905	0.0172292	1.19462	0.0134509	1.26027	0.0122151	0.752599	0.123946
CD164L2.TSS +28475	-intron (CD164L2|AMEX60DD201005606.1, intron 1 of 5)	0.671964	0.0172412	0.396276	0.150163	0.578964	0.0425231	0.213063	0.442708
CCNO.TSS -190780	Intergenic	-1.13534	0.0172426	-0.448568	0.30462	-1.6042	0.00129456	-0.555401	0.208661
GSONMT00048522001.TSS +92343	Intergenic	-1.13854	0.0172807	-1.15747	0.00800832	-0.834925	0.0779707	-0.742665	0.0893941
TRUB1.TSS -18261	Intergenic	1.78937	0.0172836	0.179331	0.810541	1.37327	0.0739855	0.676081	0.365837
FAM186A.TSS +25	#NAME?	1.04715	0.0172992	1.01454	0.0154101	0.724777	0.108342	0.414995	0.333185
DCT.TSS -139283		1.84838	0.0173132	0.549387	0.476126	0.0860118	0.917236	0.534917	0.490874
LHFPL2.TSS +26973	-intron (LHFPL2|AMEX60DD301042314.1, intron 1 of 7)	1.21521	0.0173216	1.29517	0.00742548	1.50709	0.00306964	1.02983	0.0359207
NID2.TSS -22985	-intron (AMEX60DD301011646.1, intron 3 of 3)	-1.40877	0.0173402	-0.438261	0.38481	-0.216676	0.690571	0.131668	0.793544
VMD2.TSS +26786	-intron (VMD2-HOMER11, intron 1 of 1)	-1.45316	0.0173483	-0.956188	0.0765531	-1.30906	0.0315828	-0.796958	0.143603
SLC4A3.TSS +252294	-intron (SLC4A3|AMEX60DD201056428.1, intron 6 of 22)	1.2017	0.0173611	1.45739	0.00253122	1.75606	0.000451067	1.27675	0.00875455
HSPB1.TSS +418	-exon (HSPB1|AMEX60DD301054443.1, exon 1 of 3)	1.11321	0.0173778	1.15496	0.00985064	1.40802	0.00260476	0.876103	0.0532281
TYR.TSS +142		1.06914	0.0174153	0.684196	0.120454	0.117791	0.801096	0.384279	0.387364
RELN.TSS -472351	-intron (RELN|AMEX60DD301006405.2, intron 6 of 15)	-1.27474	0.0174236	-0.552789	0.2543	0.116113	0.818043	-0.438659	0.369151
FILIP1.TSS -99892	Intergenic	0.810269	0.0174661	0.416605	0.195857	0.228235	0.520809	0.631902	0.0514022
ECT2L.TSS +266192	-intron (ECT2L|AMEX60DD301035523.1, intron 5 of 20)	-1.58488	0.017564	-1.26765	0.0332716	-1.84421	0.00733284	-1.73548	0.00492048
NFIA.TSS -188863		-1.08474	0.0175756	-0.356664	0.370899	-0.40498	0.354299	-0.491689	0.225836
ATP8B3.TSS +96471	-intron (ATP8B3|AMEX60DD301014400.1, intron 6 of 14)	-0.867224	0.0175785	-0.416608	0.211495	-0.487914	0.176841	-0.0446842	0.893629
XELAEV_18022447MG.TSS +206812	Intergenic	-1.28073	0.0175851	0.00979047	0.984511	0.0644215	0.901448	0.043184	0.932018
LMAN1L.TSS +276386	-intron (LMAN1L, intron 16 of 25)	1.27175	0.0175879	0.593547	0.255931	-0.400316	0.4954	-0.0437428	0.934884
CALB2.TSS +89731	-intron (CALB2|AMEX60DD102015523.1, intron 1 of 10)	0.960477	0.0176043	-0.312634	0.43087	0.393758	0.349146	0.505075	0.198479
HTRA4.TSS +58987	-intron (HTRA4, intron 1 of 8)	-1.52197	0.0176455	-1.65554	0.00452927	-0.821445	0.183988	-1.54372	0.0090415
ARSJ.TSS -48283	Intergenic	1.10294	0.0176486	-0.267582	0.558434	-0.580376	0.264708	-0.389854	0.405221
RASGRP4.TSS +112402	-intron (RASGRP4, intron 1 of 15)	-1.41729	0.0176504	-0.821568	0.133455	-0.524781	0.363413	-0.671128	0.223099
HMCN1.TSS -98887	-intron (HMCN1|AMEX60DD201018555.1, intron 8 of 12)	1.283	0.0176598	0.113383	0.829515	0.912126	0.0996837	0.507713	0.335633
CLDN15.TSS +136707	-intron (CLDN15|AMEX60DD201012547.1, intron 1 of 4)	1.19422	0.017666	-0.023269	0.962761	0.221055	0.672279	-0.449981	0.374617
ELP4.TSS +11509	-intron (ELP4|AMEX60DD103004908.3, intron 9 of 9)	-0.878251	0.0176783	-1.30908	0.000158242	-0.226634	0.530351	-1.08485	0.00190678
MONAX_5E023596.TSS -35680	Intergenic	-1.34568	0.0176827	-1.58766	0.00171283	-1.31995	0.0198289	-1.34926	0.00838001
E1301_TTI003913.TSS -465035	Intergenic	1.46793	0.0176995	0.626466	0.299644	0.596284	0.358215	-0.317972	0.613516
NRXN2.TSS +11913	-intron (LOC100552752, intron 1 of 6)	-1.20361	0.0177338	-0.297189	0.519414	-0.694851	0.16392	-0.46466	0.319338
CA12.TSS +52516	-intron (CA12|AMEX60DD301004041.1, intron 1 of 9)	-1.02046	0.0177389	-1.19116	0.00303796	-0.333199	0.427941	-0.179723	0.650981
GSONMT00027580001.TSS -228027	Intergenic	-1.73469	0.0177485	-1.77798	0.00847356	-0.774864	0.27032	-1.00552	0.133719
NFXL1.TSS +1338085		-0.950271	0.0177554	-0.671019	0.0705557	-0.474013	0.230906	-1.08193	0.00435471
AS27_00460.TSS -73169	Intergenic	-1.00321	0.0177605	-0.683242	0.0876574	-0.717327	0.0901084	-0.711551	0.0776046
PKHD1.TSS -39201	Intergenic	-0.683429	0.0177671	-0.950913	0.000340093	-0.76659	0.00882181	-1.15638	2.29e-05
CCDC25.TSS +599055	Intergenic	1.19384	0.0177758	0.752889	0.121023	0.262816	0.621753	1.00073	0.0401658
HOOK1.TSS +102001		-1.57104	0.0177945	-2.06083	0.000792381	-1.19032	0.0684757	-1.26553	0.0369057
ROHU_037419.TSS -563091	Intergenic	1.53771	0.0177955	-0.134436	0.835264	-0.15112	0.832004	0.366291	0.57055
AK1.TSS +28552	-intron (AK1, intron 1 of 13)	1.39819	0.0178008	0.257259	0.66009	0.187414	0.759969	0.54856	0.349427
E1301_TTI005140.TSS -218	-promoter-TSS (E1301_TTI005140-HOMER3)	-1.11952	0.0178145	-0.454205	0.281798	-0.194732	0.665701	-0.252611	0.551985
MTHFS.TSS -730594	Intergenic	-1.31254	0.0178254	-0.56524	0.253609	0.172236	0.738435	-0.775782	0.12335
ELOC.TSS +101468	Intergenic	-1.03686	0.0178255	-0.429118	0.290174	-0.81474	0.0630346	-0.414949	0.31011
FOXN4.TSS -45921	-intron (FOXN4|AMEX60DD101000758.1, intron 2 of 9)	-1.10253	0.0178307	-0.761121	0.0697181	-1.39127	0.00378373	-0.716449	0.0917075
CFAP299.TSS -44586		1.56198	0.017839	0.297426	0.646599	0.35875	0.610971	0.308181	0.639311
PARPI_0019934.TSS -134627		-1.42277	0.0178568	-0.88457	0.0856917	-0.348638	0.528896	-0.92453	0.0782682
D9C73_026590.TSS +11563	Intergenic	1.49362	0.0178726	0.0353538	0.95487	0.0949184	0.888866	0.11247	0.858679
SLC6A14.TSS -927633	Intergenic	-1.33695	0.0178803	-1.07249	0.0421111	-0.8025	0.149878	-1.0588	0.0467652
NOL4L.TSS +494029	Intergenic	1.25967	0.0179062	-0.0981228	0.851548	-0.259692	0.656346	0.665265	0.20079
MAP1A.TSS -21073	-intron (MAP1A|AMEX60DD201003375.1, intron 2 of 6)	1.62216	0.0179124	1.40764	0.0363029	1.58221	0.0219763	1.17597	0.0821932
CELF3.TSS +15270	-intron (CELF3|AMEX60DD103014951.17, intron 1 of 11)	-1.27821	0.0179201	-0.424124	0.376874	0.136421	0.786259	-0.493119	0.3102
ATG16L2.TSS +621091	Intergenic	-1.49466	0.0179275	-1.08202	0.0657186	-0.638584	0.298861	-0.656409	0.264716
PARPI_0029436.TSS -1416370	Intergenic	1.48033	0.0179483	-0.192415	0.757518	0.562905	0.390748	0.160043	0.797983
GSN.TSS -6258	Intergenic	-1.13888	0.0179919	-0.460997	0.310022	-0.672991	0.159233	-0.51559	0.259264
SEMA3C.TSS -210690	Intergenic	1.09743	0.0180151	0.753113	0.087471	0.574439	0.232316	0.193786	0.670196
STUM.S.TSS -145461	Intergenic	-1.04359	0.0180425	-0.525928	0.214555	-0.110282	0.799515	-0.711246	0.095384
CDH19.TSS +684908	-intron (CDH19, intron 6 of 24)	-1.47705	0.0180608	-1.05686	0.0634599	-0.423085	0.478567	-0.927272	0.106239
SPTBN2.TSS +11661	-intron (SPTBN2, intron 1 of 49)	-1.26908	0.0180669	-0.304252	0.508785	-0.481541	0.342867	-0.241588	0.60387
GREB1L.TSS +997	-intron (GREB1L|AMEX60DD201039483.3, intron 1 of 16)	0.514344	0.0180704	0.88168	2.76e-05	0.862652	7.27e-05	0.834482	7.82e-05
MRPS28.TSS -827	-promoter-TSS (MRPS28|AMEX60DD301039975.7)	-1.69611	0.0180822	-0.804274	0.205886	-1.6272	0.0241577	-0.992362	0.124384
NKX2-3.TSS +388562	Intergenic	-1.14874	0.0181007	-0.505694	0.271798	-0.654895	0.174676	-0.540802	0.242683
MAP1A.TSS +18182	-intron (MAP1A|AMEX60DD201003375.1, intron 2 of 6)	0.987503	0.0181027	1.31797	0.000880753	1.64023	6.83e-05	1.00013	0.0126831
TIE1.TSS +2857		-1.45929	0.0181192	-0.80743	0.154167	-0.688731	0.251569	-0.0686587	0.903219
SERPINF2.TSS -4023	-intron (SERPINF2|AMEX60DD102054925.6, intron 9 of 10)	1.45345	0.0181201	0.913433	0.127277	1.05424	0.0942346	0.849334	0.159937
PARPI_0007491.TSS -161437	Intergenic	1.13508	0.01813	-0.488662	0.306023	0.331545	0.511791	0.293011	0.534576
RASA3.TSS +151187	Intergenic	1.28271	0.0181338	-0.236964	0.659046	-0.443835	0.466622	0.234614	0.661691
AB205_0009410.TSS +44		1.33434	0.0181483	0.322819	0.555196	0.717699	0.221124	1.08275	0.045612
MUC3A.TSS +94502	Intergenic	-1.16354	0.01816	-0.94352	0.0409985	-0.969079	0.0499274	-1.15406	0.0137263
GUCD1.TSS -135112	Intergenic	-1.39314	0.0181643	-1.49213	0.00466897	-0.761259	0.178457	-1.30909	0.014215
GALNT16.TSS +23436	-intron (GALNT16|AMEX60DD103012106.2, intron 1 of 14)	1.23507	0.018221	1.26256	0.0117644	1.03146	0.0529762	0.877834	0.0842935
CRISPLD2.TSS -117683	Intergenic	0.875366	0.0182328	0.56814	0.112985	0.437884	0.251107	0.372899	0.303804
SYT14.TSS -73476	Intergenic	-1.02143	0.0182359	-0.774893	0.0462423	-0.704452	0.0988964	-0.462794	0.236088
DR999_PMT19738.TSS -157924		-1.29245	0.018255	-0.280107	0.569339	-0.419972	0.425382	-0.667583	0.182461
DNAH2.TSS -473090	Intergenic	-1.664	0.0182604	-0.933865	0.135024	-1.1002	0.108332	-1.29946	0.0422362
RADIL.TSS +271343		-1.19658	0.0182804	-0.168976	0.704616	-0.38946	0.421832	-0.405036	0.371405
FN1.TSS +979	-intron (FN1|AMEX60DD201055420.1, intron 1 of 45)	-0.661615	0.0182859	-0.235846	0.372686	-0.263106	0.34573	-0.63023	0.0188521
CRIP2.TSS +3794	-intron (CRIP2|AMEX60DD102012001.3, intron 1 of 7)	-1.47995	0.0182871	-0.672332	0.202525	-0.686455	0.241171	-0.759943	0.158152
TMEM150A.TSS +201660	Intergenic	0.987741	0.0182984	0.497572	0.215832	0.682897	0.111614	0.322061	0.430559
DNAJC22.TSS -674629	Intergenic	-1.59001	0.018304	-1.00397	0.0892382	-0.163993	0.791217	-0.355063	0.546026
PTPRF.TSS +108547		0.892267	0.0183108	0.128218	0.727843	-0.0016379	0.996716	0.0508599	0.8915
COL6A6.TSS +1276		-1.23834	0.0183166	-0.880285	0.0743329	0.142811	0.777135	-0.845268	0.0889085
TYR.TSS -70788	Intergenic	-0.970094	0.0183197	-1.43484	0.000131123	-1.27606	0.00257353	-1.18544	0.00176167
ART1.TSS +328315	Intergenic	1.30284	0.0183511	-0.237867	0.663679	1.02802	0.0681741	0.387102	0.475292
ASZ78_016408.TSS -209	#NAME?	-1.59443	0.0183723	-1.01126	0.0865696	-1.32426	0.0467322	-0.889945	0.135754
CIB84_012915.TSS -315518	Intergenic	-1.30381	0.0183922	-0.835508	0.0866645	-0.320029	0.53902	-0.654654	0.183356
ACVRL1.TSS +1784	-intron (ACVRL1|AMEX60DD201030013.1, intron 1 of 9)	0.913439	0.018394	1.35935	0.000305433	1.59346	3.44e-05	1.36417	0.000304205
TMPRSS9.TSS -728785	Intergenic	1.25043	0.0184009	-0.00938549	0.985666	0.751729	0.169031	0.440258	0.399638
NHS.TSS -52182	-intron (NHS|AMEX60DD201047964.1, intron 1 of 8)	1.3026	0.0184249	0.609298	0.257816	0.107415	0.855425	0.54213	0.319153
THSD4.TSS +377531	-intron (THSD4|AMEX60DD301003786.1, intron 4 of 6)	-1.71362	0.0184253	-0.244785	0.705091	-0.259862	0.702553	-0.297278	0.648251
DR999_PMT03717.TSS +220925	-intron (DR999_PMT03717, intron 9 of 27)	1.39266	0.0184751	0.77955	0.172547	1.09636	0.0697668	0.728784	0.207676
SNX33.TSS -32431	Intergenic	-1.25779	0.0185024	-0.855218	0.0617406	-0.285384	0.563026	-0.0395965	0.93019
SMUG1.TSS +990241	Intergenic	-1.60708	0.0185056	-0.286573	0.642353	0.0628812	0.921666	-0.261474	0.673571
VWA1.TSS +136016	-intron (VWA1|AMEX60DD301051288.1, intron 1 of 1)	-1.34469	0.0185273	-0.246	0.630107	-0.491022	0.371228	-0.642009	0.216611
SH3RF1.TSS +91924	-intron (SH3RF1|AMEX60DD201045248.1, intron 2 of 11)	1.69942	0.0185797	1.31631	0.0578181	-0.347151	0.672284	0.911373	0.198219
ROHU_001488.TSS -1032009	Intergenic	-0.817041	0.0185806	-1.11269	0.000451293	-0.540827	0.114654	-0.678927	0.0324396
N/A.TSS +31530	-intron (N/A|AMEX60DD301024471.1, intron 1 of 6)	2.23173	0.0185998	2.71703	0.00274922	3.33071	0.000326427	2.65957	0.00356099
FREM2.TSS +73272	-intron (FREM2|AMEX60DD201049164.1, intron 2 of 23)	-1.37188	0.018601	0.129079	0.793005	-0.14461	0.787104	-0.0807545	0.871564
ZBTB20.TSS -212918	-intron (ZBTB20|AMEX60DD201046990.1, intron 2 of 8)	0.914969	0.0186237	1.32051	0.000323985	0.985045	0.0119338	0.826815	0.0267963
RASD1.TSS +1943		2.08038	0.0186546	-0.899163	0.31278	0.686119	0.444168	-0.0800538	0.928208
NKX1-1.TSS -1065043		-0.768342	0.0186602	-0.886015	0.00384216	-0.654314	0.0466622	-0.371622	0.224974
ASZ78_003442.TSS +8729	-intron (ASZ78_003442, intron 2 of 8)	0.687051	0.0186651	1.44934	2.61e-07	1.54884	7.84e-08	1.28702	5.32e-06
EPHA7.TSS +53787	-intron (EPHA7, intron 6 of 36)	1.7809	0.0187005	0.418281	0.578183	0.158792	0.843346	0.561388	0.457746
CELF4.TSS -59378	-intron (AMEX60DD301041623.1, intron 4 of 4)	-1.40862	0.018704	0.562949	0.262842	0.235879	0.66166	-0.0187432	0.970844
PARPI_0003670.TSS +297411	Intergenic	-1.25761	0.0187069	-0.890318	0.0675867	-0.662278	0.204793	-0.896684	0.0690062
GALNTL6.TSS -91934	Intergenic	-1.83856	0.0187091	-1.86198	0.00988008	-1.09029	0.150886	-1.56433	0.0310138
MYO1G.TSS -116379		-1.49197	0.0187173	-0.741567	0.150558	-0.313288	0.577422	-0.924191	0.0825698
ARR2.TSS -236532	Intergenic	0.803473	0.0187443	1.54681	2.21e-06	1.61553	1.62e-06	1.34074	4.56e-05
FREM1.TSS -838		0.917263	0.0187472	0.562117	0.128776	0.597688	0.135556	0.54198	0.148434
PRDM10.TSS -354809	Intergenic	-1.38301	0.0187565	0.145792	0.776764	0.293898	0.586434	-0.246678	0.636617
CNTD2.L.TSS +66001	-intron (CNTD2.L, intron 2 of 7)	-1.64374	0.0187662	-0.281623	0.605695	0.027153	0.963415	-0.291317	0.599754
HSD3B7.TSS -53874	-intron (HSD3B7, intron 1 of 31)	0.862628	0.0187756	0.7354	0.0376686	0.329985	0.384613	0.783464	0.0277783
ARVCF.TSS +25209	-intron (ARVCF|AMEX60DD201000160.1, intron 1 of 15)	-1.52199	0.0187767	-0.593509	0.286878	-0.572221	0.346189	-1.00837	0.0784811
NRCAM.TSS +99435	-intron (AMEX60DD301006339.20, intron 2 of 3)	1.69301	0.0188023	1.13312	0.105436	1.1683	0.115658	1.56752	0.025216
ITIH5.TSS +107668	-intron (ITIH5, intron 2 of 12)	1.39602	0.0188509	-0.00762747	0.989701	0.209921	0.73422	-0.14698	0.805426
PIK3CD.TSS -447644	Intergenic	0.653546	0.0188855	1.10128	4.72e-05	0.952611	0.000629103	1.02641	0.00015795
MRPL22.TSS +662329	Intergenic	1.45602	0.018894	0.66211	0.27455	0.24987	0.705203	0.0427242	0.945219
ANO8.TSS -167448	Intergenic	-1.00182	0.0189137	0.164591	0.685417	0.216618	0.60303	0.163011	0.689231
CRABP1.TSS -74801	Intergenic	1.378	0.0189455	0.295131	0.607955	0.506421	0.411665	0.532571	0.357356
APBB3.TSS -53548	Intergenic	1.08513	0.0189641	0.207123	0.645954	-0.0427455	0.931022	0.234769	0.60639
EFNA5.TSS +16774	-intron (EFNA5|AMEX60DD201042697.1, intron 1 of 3)	-2.23985	0.0189687	-0.164445	0.837591	0.714486	0.38423	-0.206553	0.798317
KYAT3.TSS -222301	Intergenic	-1.65697	0.0189858	-1.05357	0.087666	-1.36453	0.0495792	-1.2349	0.0501697
MEP1B.TSS -92847	-intron (MEP1B|AMEX60DD301039624.1, intron 1 of 13)	-1.33166	0.0189975	-1.33781	0.00800007	-0.788555	0.149402	-0.367087	0.458551
SPRED1.TSS -455727	Intergenic	-1.05811	0.0190411	-0.776637	0.0554074	-1.02381	0.0241992	-0.990087	0.0170262
FAM216A.TSS +96780	-intron (FAM216A|AMEX60DD201000666.1, intron 1 of 7)	1.53198	0.0190457	0.904596	0.151316	0.161193	0.820184	0.773554	0.226899
FLI1.TSS -157308	Intergenic	1.40163	0.0190942	0.442525	0.451479	0.434089	0.488007	0.522519	0.377371
SH3RF2.TSS -229676	Intergenic	-1.00737	0.0190969	-0.638955	0.091557	0.215894	0.587872	-0.906208	0.0200243
N323_01721.TSS -90013	Intergenic	-1.64604	0.0191102	-0.132172	0.838733	-0.13898	0.835917	-0.488951	0.455114
SLC13A5.TSS -120104	Intergenic	-1.02667	0.0191261	-0.788537	0.0533154	-0.820056	0.0618217	-0.765332	0.0632121
ROHU_037172.TSS +239309	Intergenic	-1.37825	0.0191438	-0.817053	0.104643	-0.69348	0.212517	-0.329453	0.51251
ACAN.TSS +30936	-intron (ACAN|AMEX60DD201004178.2, intron 1 of 17)	-1.55398	0.0191583	-0.912164	0.121226	-1.34592	0.041391	-0.919214	0.123162
EFCAB8.TSS -180243	Intergenic	1.0021	0.019175	0.539368	0.195878	0.636856	0.14544	0.47685	0.256628
PLXNB1.TSS +64739	-intron (PLXNB1|AMEX60DD201023205.1, intron 8 of 26)	1.12859	0.0191792	0.779014	0.0879302	1.0298	0.0346596	0.627967	0.176648
ZIC1.TSS -238771	Intergenic	-1.21469	0.0191921	-0.761956	0.124236	-0.644458	0.210276	-0.639088	0.198982
DR999_PMT15446.TSS -70965	Intergenic	1.54031	0.0192366	0.464877	0.468788	0.581992	0.403001	1.01698	0.111977
BRCA1.TSS +648277	Intergenic	0.997405	0.0192461	1.09389	0.00718662	1.13347	0.00814648	0.772093	0.0611848
CIT.TSS -392	-promoter-TSS (CIT|AMEX60DD201000535.11)	1.1676	0.0192757	0.750907	0.122998	0.538571	0.295395	0.346003	0.483046
ARL1.TSS -65333	Intergenic	1.33234	0.019278	-0.802803	0.162313	-0.15796	0.795798	-0.256509	0.654522
C27H1ORF21.TSS -309352	Intergenic	0.843113	0.0192802	0.263828	0.444126	0.593792	0.107253	0.601406	0.0821116
INTS6.TSS -34568	Intergenic	1.52974	0.0192908	0.0246724	0.96967	0.235676	0.735081	-0.267634	0.686618
NRXN2.TSS +262906	-intron (LOC100552752, intron 1 of 6)	0.997253	0.0193	0.268122	0.520156	0.124904	0.779084	0.33224	0.428707
HTR1E.TSS +530789	-intron (AMEX60DD201033797.1, intron 4 of 5)	-1.39772	0.0193009	-1.4166	0.00679569	-1.10154	0.0581658	-0.830027	0.110385
SLC44A2.TSS -50555		1.05499	0.0193104	1.27301	0.00331394	0.470431	0.313775	0.801374	0.0679404
EGK_16345.TSS -71465		-1.1489	0.0193111	-0.865858	0.058961	-0.39418	0.411607	-0.644738	0.161659
FQN60_016711.TSS +23789	Intergenic	1.57398	0.0193115	0.343698	0.603926	0.453402	0.525205	0.42487	0.52545
NKD1.TSS -317	-promoter-TSS (NKD1|AMEX60DD301017671.4)	-1.47004	0.0193248	-0.540441	0.310754	-0.659731	0.263633	-1.14517	0.0390195
YIPF7.TSS +52414		-0.969979	0.0193422	-1.26372	0.000698035	-1.09736	0.00886596	-1.10141	0.0035993
COL3A1.TSS +1921	-intron (COL3A1, intron 2 of 122)	-0.93749	0.0193581	-0.758995	0.0429194	0.335108	0.383612	-0.764325	0.0435657
DCDC2.TSS +189793	-intron (DCDC2, intron 4 of 9)	0.878253	0.0194031	0.637804	0.0734685	0.989884	0.00872405	0.477891	0.186878
SEMA6B.TSS -398136	Intergenic	1.43527	0.0194131	0.490904	0.412336	0.737383	0.249098	0.997577	0.0954595
ADGRB3.TSS +1024669	Intergenic	-1.67588	0.0194164	-1.19419	0.0594187	-1.23569	0.0775516	-0.683895	0.279859
KIF3C.TSS +291804	-intron (KIF3C|AMEX60DD201032626.1, intron 1 of 9)	0.945052	0.0194191	0.483063	0.22044	0.634101	0.124224	0.31166	0.433676
KALRN.TSS +404084	-intron (KALRN|AMEX60DD201056078.10, intron 1 of 58)	-0.847452	0.0194406	-0.327626	0.317199	-0.684051	0.0591872	-0.300251	0.364569
RSPH14.TSS +90769	Intergenic	1.13097	0.0194506	1.09427	0.0162013	0.888001	0.0718098	1.39481	0.00225833
TBX15.TSS +352611	Intergenic	1.06497	0.0194572	1.04072	0.0155787	1.06853	0.0201079	1.21892	0.00486295
PACSIN1.TSS -26431	-intron (PACSIN1|AMEX60DD301008753.1, intron 1 of 9)	0.863544	0.0194928	1.30212	0.000274138	1.37908	0.000178695	1.10638	0.0021093
FHOD3.TSS -286868	Intergenic	-1.19036	0.0194931	-0.505948	0.254007	0.100027	0.831446	-0.714374	0.115185
FBXL14.TSS -161457	-intron (WNT-5B, intron 22 of 35)	1.42419	0.0195043	0.761099	0.199452	0.566074	0.375735	0.74957	0.21069
XELAEV_18046802MG.TSS +561093		1.06912	0.0195116	-0.346866	0.442385	-0.697057	0.174893	-0.305943	0.504672
CACNA1C.TSS +125488	-intron (CACNA1C|AMEX60DD201006925.1, intron 4 of 44)	1.1739	0.0195252	1.04493	0.0342297	0.976009	0.0548851	0.929526	0.060785
KCNH2.TSS +129354		-1.31807	0.0195603	-0.596795	0.196646	-0.113896	0.820147	-1.00196	0.0381734
MAF1.TSS -117719		2.23672	0.0196098	0.338945	0.723803	2.10127	0.0292463	-0.477497	0.62574
GRIP1.TSS -156472	-intron (GRIP1|AMEX60DD201008213.1, intron 6 of 22)	1.4676	0.0196237	-0.602183	0.342416	0.533029	0.418347	-0.632358	0.327789
D4764_11G0002650.TSS -556026	-intron (KCNMA1|AMEX60DD201052212.1, intron 9 of 27)	1.00282	0.0196319	0.413381	0.316411	0.285715	0.526329	0.408772	0.327988
TNFSF11.TSS +344397	-intron (TNFSF11|AMEX60DD301049101.1, intron 4 of 4)	1.13507	0.0196409	0.158297	0.739633	-0.0378886	0.941784	0.133545	0.781655
GATA3.TSS +3103	-intron (GATA3|AMEX60DD201008149.3, intron 2 of 5)	1.3593	0.0196557	-0.659578	0.258801	0.938529	0.111293	-0.305982	0.60107
SYK.TSS -49	-promoter-TSS (SYK|AMEX60DD201042964.2)	1.97084	0.0196591	0.64642	0.439948	0.206482	0.821151	1.25569	0.132807
FAM110D.TSS +20968	-exon (FAM110D|AMEX60DD201005704.1, exon 2 of 2)	1.46756	0.0196671	0.791187	0.192544	1.42971	0.0245224	0.943368	0.123138
NRXN2.TSS -50659	-intron (NRXN2|AMEX60DD201025260.1, intron 6 of 11)	1.4274	0.0196899	1.14732	0.05315	0.430643	0.504288	1.21739	0.0413551
ROHU_001488.TSS -225306		-1.62814	0.0197064	-1.06023	0.0908559	-1.11404	0.102837	-1.14884	0.0709596
IL13RA2.TSS +119953	-intron (IL13RA2|AMEX60DD201037552.1, intron 3 of 9)	1.2705	0.0197112	-0.117065	0.827132	0.0751291	0.898307	0.100657	0.852399
GNAI1.TSS -183627	Intergenic	1.57777	0.0197498	0.391341	0.556904	1.01805	0.14473	0.384114	0.568799
GNAI1.TSS -385077	Intergenic	1.27646	0.0197687	0.152007	0.775607	-0.0156148	0.979063	0.0559829	0.918184
BIRC7.TSS -15525	Intergenic	1.05139	0.0197932	0.765989	0.0741884	0.303341	0.522467	0.545082	0.21197
CHRDL1.TSS +1196	-intron (CHRDL1|AMEX60DD201037123.1, intron 1 of 9)	-0.779059	0.0198189	0.167363	0.604021	0.0855602	0.795684	0.176034	0.58641
SYTL3.TSS +56	-promoter-TSS (SYTL3|AMEX60DD201035168.1)	0.695597	0.0198352	0.798642	0.00577286	0.426867	0.160686	0.71309	0.0142781
TMEM45B.TSS -43280	-intron (TMEM45B.L, intron 4 of 50)	-1.44328	0.019844	-1.34306	0.0212487	0.785112	0.178446	-1.26529	0.0313162
DR999_PMT10174.TSS +266935	-intron (DR999_PMT10174, intron 3 of 7)	0.780226	0.0198453	0.270179	0.397133	0.372872	0.280979	0.480629	0.134724
CHK1.TSS -20882	Intergenic	-1.22088	0.0198515	-0.442509	0.345337	-0.191392	0.700984	-0.353462	0.454765
PTP4A1.TSS -660171	Intergenic	-0.836766	0.0198643	-0.773563	0.0153324	-0.782717	0.0288961	-0.835516	0.0105023
ZSWIM6.TSS +231996	Intergenic	-1.11947	0.0198699	-0.632902	0.160915	-0.575102	0.226255	-0.558972	0.218371
ARVCF.TSS +82880	-intron (ARVCF|AMEX60DD201000160.1, intron 1 of 15)	0.824648	0.0198735	0.490214	0.151548	0.58715	0.104318	0.263912	0.446069
CALHM4.TSS -134666	Intergenic	-1.56802	0.0198745	-1.44125	0.01793	-0.911662	0.161951	-1.75261	0.00517725
GOLIM4.TSS +47885	-intron (GOLIM4|AMEX60DD201001761.1, intron 1 of 14)	1.52422	0.0198769	0.772089	0.222835	0.334897	0.633374	1.06013	0.0955711
NRXN2.TSS +343750	-intron (LOC100552752, intron 2 of 6)	1.36193	0.0198783	0.566347	0.325301	0.726748	0.226087	0.52606	0.364207
IL17RD.TSS +159210	Intergenic	-1.35679	0.0198824	-1.87981	0.00047619	-1.43335	0.0154092	-1.76314	0.00126874
PLD3.TSS -63096	-intron (PRX, intron 3 of 12)	-1.11575	0.0199048	0.0325217	0.941277	-0.471829	0.315785	-0.00871754	0.984344
N/A.TSS +56144	Intergenic	-1.909	0.0199233	0.0769735	0.910865	0.684138	0.335658	-0.419884	0.548502
MAJIN.TSS -29198	-intron (MAJIN|AMEX60DD301025269.2, intron 1 of 7)	-1.15925	0.0199503	-0.848876	0.0626404	-0.690711	0.158997	-0.729877	0.112523
SLC17A7.L.TSS +458393		1.4177	0.0199807	0.158399	0.792201	0.752108	0.232998	0.149247	0.806166
ROHU_037419.TSS -872754	Intergenic	1.24495	0.0200073	0.0353354	0.945989	0.719419	0.193003	0.626715	0.2264
HMGCS2.TSS +1754	-intron (HMGCS2|AMEX60DD102018589.2, intron 1 of 10)	-1.51613	0.0200278	-1.09344	0.064035	0.196547	0.745137	-1.31846	0.0285036
FGD5.TSS -186012	Intergenic	1.23405	0.020101	0.345737	0.501759	0.48971	0.378894	0.251741	0.630678
TIMP1.TSS +80236	-intron (SYN1|AMEX60DD201020991.1, intron 2 of 13)	1.17548	0.0201309	0.21213	0.667919	0.237916	0.655528	0.257962	0.605561
SLURP1L.S.TSS +120241	-intron (SLURP1L.S, intron 6 of 8)	1.51086	0.0201508	-0.915024	0.164893	-0.0101128	0.988262	-0.37978	0.563749
NRXN2.TSS +496046	-intron (LOC100552752, intron 2 of 6)	1.23928	0.0201772	-0.808931	0.134099	0.320819	0.569474	0.191961	0.716153
S100A1.TSS +30681	-intron (S100A1|AMEX60DD102015004.4, intron 2 of 2)	1.10742	0.0201992	0.0365504	0.937734	0.631695	0.197944	0.0951635	0.840364
THSD4.TSS +364798	-intron (THSD4|AMEX60DD301003786.1, intron 4 of 6)	1.7149	0.0202112	1.30675	0.0672043	1.78293	0.0164745	1.41295	0.049252
XELAEV_18022447MG.TSS -311598		1.50986	0.0202679	0.661934	0.295986	0.313985	0.651882	0.177643	0.784769
DR999_PMT15481.TSS +725	-intron (AMEX60DD301027182.1, intron 1 of 1)	-1.25209	0.0202708	-0.145623	0.758614	-0.386112	0.452806	-0.718308	0.139522
NOP9.TSS -279044	-intron (KHDC4|AMEX60DD301014832.1, intron 13 of 13)	1.3101	0.0203025	-0.327367	0.560099	1.09851	0.0558867	0.0798844	0.887121
NFXL1.TSS -273857		1.41766	0.0203822	-0.0260552	0.965653	0.266238	0.682079	0.0662992	0.913681
PANF.TSS +155216	Intergenic	-1.57017	0.0203871	-1.11282	0.0649573	-1.0846	0.100712	-1.40404	0.023136
RGS1.TSS -1055	-intron (RGS1|AMEX60DD301018504.1, intron 1 of 4)	2.16983	0.020487	2.65958	0.00286549	3.04642	0.000894081	2.33339	0.00961098
PDZRN3.TSS -25631	-intron (PDZRN3|AMEX60DD301023195.2, intron 4 of 10)	0.559229	0.0204987	0.55047	0.019324	0.597465	0.0140116	0.357764	0.130889
GFRA1.TSS -289154	Intergenic	1.7614	0.0205017	0.124165	0.869842	0.382208	0.633567	0.0135212	0.985939
D9C73_028124.TSS +3738	-TTS (D9C73_028124-HOMER8)	-1.75249	0.0205243	-1.65286	0.0193192	-2.14096	0.00646571	-1.44285	0.0423256
FAM221B.TSS +403	-exon (FAM221B|AMEX60DD301041400.1, exon 1 of 6)	0.716156	0.0205598	-0.199518	0.504972	-0.0484049	0.881981	-0.253999	0.404202
VSIG2.L.TSS -83330	-exon (ESAM|AMEX60DD201054001.1, exon 7 of 7)	1.28285	0.0205599	0.205748	0.70277	-0.0715304	0.905723	0.568454	0.293126
PHACTR3.TSS +122456	-intron (PHACTR3|AMEX60DD201027243.1, intron 4 of 7)	1.23242	0.0205658	-0.0142291	0.978404	0.0587036	0.916882	-0.10024	0.8506
CLDN14.TSS +272305	Intergenic	-1.28301	0.0206126	-0.929209	0.0454015	-0.685988	0.184253	-0.821043	0.0823279
DR999_PMT11966.TSS +2963	-intron (DDHD1.L, intron 2 of 29)	-1.28663	0.0206258	-0.179228	0.717697	-0.518396	0.3337	-0.335234	0.503921
TBCK.TSS +123760	Intergenic	-2.1038	0.0206285	0.33725	0.642987	-0.613023	0.446594	0.521026	0.475807
MAP1A.TSS +38478	-intron (MAP1A|AMEX60DD201003375.1, intron 2 of 6)	1.94555	0.0206501	1.89783	0.0177688	2.48074	0.0027163	1.1453	0.164678
CIB84_015861.TSS -25245		-0.808443	0.0206832	-0.421095	0.199007	-0.466697	0.180236	-0.399718	0.226255
CES5A.TSS +82556		1.06645	0.0207087	0.464371	0.297533	0.236991	0.625148	0.223893	0.621488
CDK14.TSS +25864	-exon (CDK14|AMEX60DD103022202.9, exon 2 of 17)	1.00255	0.0207186	-0.487231	0.255427	0.561808	0.209249	-0.199154	0.644117
NXPE2.L.TSS +309996	Intergenic	1.41702	0.0207234	0.265356	0.659457	-0.574294	0.403814	0.529545	0.381491
EBF2.TSS +118098	-intron (EBF2|AMEX60DD102002999.3, intron 6 of 16)	-1.18023	0.0207386	-0.439068	0.302054	-0.12591	0.785973	-0.640154	0.143559
PARPI_0014716.TSS +120251	-intron (PARD6A|AMEX60DD201015558.1, intron 2 of 3)	-1.11963	0.0207425	0.063205	0.878427	-0.538003	0.246153	0.0158252	0.969841
TCF7L2.TSS +893392	Intergenic	1.4691	0.0207666	-0.496145	0.436599	0.0603871	0.928755	-0.442972	0.492417
AVIL.TSS -6788	-intron (AVIL|AMEX60DD201029613.1, intron 1 of 19)	0.911146	0.0207797	0.440065	0.242857	-0.0104065	0.980199	0.625087	0.0994818
A306_00009022.TSS +72994	-intron (A306_00009022, intron 1 of 4)	-1.36207	0.0207872	-0.581873	0.225452	-0.478556	0.370308	-0.587979	0.230268
ST3GAL2.TSS +65532	-intron (ST3GAL2|AMEX60DD201015545.1, intron 1 of 6)	1.28563	0.0208001	0.625333	0.245146	0.992041	0.0812621	0.265817	0.628837
MAP2K5.TSS +456956	-intron (MAP2K5|AMEX60DD201003408.1, intron 16 of 21)	0.974824	0.0208033	0.468526	0.248321	0.65024	0.132938	0.196084	0.635295
ALPK3.TSS +450271	-intron (ALPK3|AMEX60DD301004045.1, intron 4 of 14)	-1.37756	0.0208167	-0.962105	0.0753561	-0.371392	0.51435	-0.703718	0.195659
WNT9A.TSS +174537	-intron (WNT9A|AMEX60DD301020504.1, intron 1 of 3)	1.3504	0.0208477	0.373215	0.517836	0.38236	0.528048	0.0977794	0.866937
AUTS2.TSS -1359	Intergenic	-1.14843	0.0208512	-0.23229	0.618293	-0.389514	0.424686	-0.071186	0.879038
NOD1.TSS +186494		1.46651	0.0208651	0.15877	0.800665	0.553076	0.401227	0.336745	0.594266
PDYN.TSS +23211	-intron (PDYN|AMEX60DD201027118.1, intron 1 of 2)	1.69773	0.0208697	-0.0974441	0.894475	0.663828	0.385968	-0.302785	0.685474
BTG4.TSS +111869	Intergenic	0.618233	0.0208748	0.274363	0.294008	0.0989803	0.718428	0.0859941	0.744241
ATXN3.TSS -172789	Intergenic	-1.78613	0.0208818	-1.67354	0.0177871	-0.769379	0.297251	-1.50452	0.0347024
ACE.TSS +310304	Intergenic	-1.47475	0.0208991	-2.05413	0.000541041	-1.61749	0.0131805	-1.6356	0.00595284
ARVCF.TSS +72634	-intron (ARVCF|AMEX60DD201000160.1, intron 1 of 15)	-1.20579	0.0209198	-1.53517	0.00110296	-0.988922	0.0546089	-1.31218	0.00583841
IQSEC1.TSS -19728	-intron (IQSEC1|AMEX60DD201024042.1, intron 1 of 13)	0.942706	0.0209255	0.855263	0.0293262	0.301316	0.478047	0.508955	0.200975
PPP1R14A.TSS +34000	-intron (PPP1R14A|AMEX60DD201024639.1, intron 1 of 3)	1.53071	0.0209441	0.101976	0.876575	0.763952	0.267569	0.254181	0.70097
ZFPM1.TSS -134888	Intergenic	-1.68785	0.0209701	-0.349123	0.578997	-0.278604	0.678407	-0.717232	0.263504
GALNTL6.TSS +250719	-intron (GALNTL6|AMEX60DD201045276.1, intron 2 of 7)	-1.22012	0.0209848	-0.916962	0.0501524	-1.42836	0.00826656	-1.35737	0.00521767
EOD39_19681.TSS -76092	Intergenic	1.35977	0.021033	0.653821	0.255376	0.742009	0.223568	0.12292	0.834312
GRM4.TSS +33617	-intron (GRM4|AMEX60DD301008744.1, intron 1 of 4)	0.803474	0.0210331	0.356774	0.292957	0.42693	0.230801	0.495043	0.146418
ACY3.TSS +114933	Intergenic	0.993146	0.0210714	-0.03983	0.923836	0.325623	0.469889	0.352251	0.398717
DPX16_4744.TSS +546736	Intergenic	-0.7793	0.0210804	-0.0147389	0.96037	-0.124095	0.702225	-0.00369435	0.990184
SLC12A1.TSS +4407	-intron (SLC12A1|AMEX60DD101003743.4, intron 2 of 24)	-1.66082	0.0211036	-0.41541	0.481209	-0.412665	0.523676	-0.517187	0.389131
ROHU_007132.TSS -161329	Intergenic	-0.991244	0.021107	-1.21131	0.00335286	-0.421708	0.322228	-0.855609	0.0386709
ATP4B.TSS +254343	-intron (ATP4B|AMEX60DD201048267.2, intron 5 of 7)	1.13777	0.0211252	-0.258139	0.595702	0.291057	0.575646	0.320478	0.508474
BBIP1.TSS -76495	-intron (NPTXR, intron 1 of 3)	1.01537	0.021134	0.202424	0.641092	0.484268	0.281682	0.274555	0.5292
MELK.TSS -383598	Intergenic	1.28914	0.0211367	0.723164	0.181199	0.384993	0.513861	0.302513	0.584088
NRXN3.TSS +334780	-intron (NRXN3|AMEX60DD201011291.1, intron 3 of 6)	1.28737	0.0211456	0.348977	0.522765	0.266778	0.651467	0.675881	0.217235
UNC13C.TSS +455281	-intron (UNC13C|AMEX60DD201003673.1, intron 24 of 29)	1.04258	0.0211478	0.024418	0.955854	0.338255	0.474363	0.181206	0.683804
ANTXR2.TSS +217282	-intron (ANTXR2|AMEX60DD301024951.1, intron 7 of 16)	-1.44331	0.0211749	-0.470355	0.393627	0.335764	0.557338	-0.0987054	0.858232
BRSK1.TSS +126368	-intron (BRSK1, intron 3 of 78)	1.30447	0.0212162	-0.206573	0.71281	0.0913397	0.880099	-0.0547882	0.922976
ADCK1.TSS +11794	-intron (ADCK1|AMEX60DD201011290.1, intron 1 of 11)	1.50874	0.0212815	1.03618	0.102115	1.89472	0.00370655	0.880905	0.169896
AZU1.TSS +150359	Intergenic	1.24678	0.0212984	0.259498	0.627168	0.260517	0.64362	0.157093	0.7707
DUSP22.TSS -3289	Intergenic	-0.650027	0.0212999	0.612963	0.013154	0.2652	0.322422	0.283552	0.259302
B4GALNT4_0.TSS +344769	-intron (B4GALNT4|AMEX60DD201004555.1, intron 1 of 19)	1.32943	0.0213161	1.18263	0.0335401	0.548962	0.363292	1.18009	0.0352438
HCN2.TSS +89835	-intron (HCN2|AMEX60DD201013670.1, intron 1 of 7)	-0.796164	0.0213237	-0.622644	0.05219	-0.758952	0.0299291	-0.657872	0.0427282
ELAVL3.TSS -379399		1.87245	0.0213306	0.115381	0.887073	0.139485	0.87377	1.0579	0.189095
TOP2A.TSS +248089	Intergenic	1.27632	0.0213319	-0.183181	0.738311	0.562528	0.330862	-0.123025	0.824832
EOD39_5801.TSS -4031	Intergenic	1.46168	0.0213448	0.943436	0.124724	0.815057	0.216584	1.40473	0.0223015
HSPG2.TSS -107050	Intergenic	1.29215	0.0213667	1.2179	0.0213979	1.43705	0.0103999	0.858155	0.112538
GRIA2.TSS +144960	-intron (GRIA2, intron 4 of 32)	1.50422	0.0213902	1.40327	0.0227751	1.64344	0.0114829	1.49139	0.0164119
OVCA2.TSS -181612	Intergenic	1.39042	0.0214081	0.514367	0.384879	0.878523	0.157582	0.616728	0.300874
NRXN3.TSS +124591	-intron (NRXN3|AMEX60DD201011291.1, intron 2 of 6)	-1.43295	0.0214445	-1.00649	0.062005	-0.658467	0.262663	-0.128442	0.809357
APLP2.TSS -144759	Intergenic	-1.40391	0.0214462	-0.531561	0.284389	0.415928	0.425419	-0.559687	0.269583
CRIP2.TSS +24625	-intron (CRIP2|AMEX60DD301012001.1, intron 1 of 7)	1.48224	0.0214716	1.76657	0.0035846	1.77714	0.00550923	1.14793	0.064375
IGLV.TSS +9474		1.37038	0.0214875	0.843755	0.145982	0.638963	0.302171	0.922592	0.114162
DR999_PMT02674.TSS -619599	-intron (DR999_PMT02674, intron 2 of 2)	1.48206	0.0214934	1.0324	0.0946419	1.09582	0.0975464	1.12148	0.0719126
CSMD2.TSS +186504	-intron (CSMD2|AMEX60DD201006008.1, intron 2 of 65)	-1.53387	0.0214971	-0.931539	0.112722	-0.755748	0.23551	-1.24353	0.0390232
FBLN7.TSS -3932	Intergenic	1.44687	0.0215224	1.31009	0.0272793	1.07632	0.0935238	0.702935	0.251404
EEF1AKMT3.TSS +147017	-intron (EEF1AKMT3|AMEX60DD201029615.2, intron 1 of 2)	-1.23737	0.0215326	-0.513949	0.293241	-0.847881	0.11128	-0.23415	0.633296
COL6A6.L.TSS -879375	Intergenic	-1.15225	0.0215435	-1.22745	0.00986591	-1.23289	0.0156745	-0.887581	0.0627414
DPX16_23792.TSS -4120	Intergenic	1.51165	0.0215468	1.0622	0.0936461	-0.649526	0.390932	-0.0913103	0.890874
PLEKHS1.TSS -26944	Intergenic	1.25842	0.0215617	0.0578875	0.91505	0.249828	0.659697	0.122748	0.822084
RASGRP2.TSS +4131	-intron (RASGRP2, intron 3 of 8)	1.8114	0.0215795	0.128813	0.869972	-0.52449	0.541248	-0.0461752	0.953706
ZBTB46.TSS -37052	Intergenic	1.24029	0.0215798	0.600019	0.252506	0.652913	0.242842	0.339121	0.524459
ROHU_003591.TSS -581604	Intergenic	-1.39134	0.0215877	-0.891259	0.100289	-0.49527	0.391859	-1.46569	0.00900267
STON2.TSS +153003	-intron (STON2, intron 1 of 17)	-1.0539	0.0216176	-0.537839	0.188658	-0.463002	0.297979	-0.349414	0.396682
TENM2.TSS +9980	-intron (TENM2|AMEX60DD201030344.1, intron 1 of 28)	1.2735	0.0216202	0.365317	0.494571	0.0111757	0.985167	0.5063	0.349018
CARF.TSS -333058	-intron (CARF|AMEX60DD201055003.1, intron 10 of 14)	-0.916723	0.0216308	-0.647995	0.0732734	0.250216	0.507299	-0.984224	0.00804224
FREM2.TSS +255336	-intron (FREM2|AMEX60DD201049164.1, intron 2 of 23)	0.943845	0.0216594	1.13431	0.00415875	0.942705	0.023219	1.11894	0.00493634
MARCHF9.S.TSS +416188	-intron (MARCHF9.S, intron 1 of 4)	1.90174	0.0216615	-0.497247	0.550928	1.09103	0.195032	-0.979448	0.24888
NQO1.TSS +528	-intron (NQO1, intron 1 of 5)	-0.789621	0.0216726	-0.126032	0.693142	0.143565	0.6672	-0.0995736	0.756865
MTHFS.TSS -705914	Intergenic	-1.35834	0.0216845	-0.911277	0.0931388	-0.24484	0.665386	-1.26605	0.022242
CNTNAP5.TSS -1287	Intergenic	1.3646	0.021687	0.42208	0.467353	0.981496	0.107423	0.0339401	0.954463
NR5A1.TSS -427893	Intergenic	-0.961502	0.0216997	-0.775661	0.0430108	-0.542131	0.189277	-0.376359	0.327086
IRX5.TSS +1814	-exon (IRX5|AMEX60DD201017758.1, exon 1 of 4)	-1.58172	0.02171	-1.45085	0.0257914	0.532513	0.414675	-1.10587	0.0900239
CTDSP1.TSS +184158	Intergenic	-1.37171	0.021718	-1.41266	0.00731114	-0.937952	0.104081	-0.588773	0.256052
MFAP4.TSS -31727	Intergenic	-1.43782	0.0217507	-1.1685	0.0309375	0.0975747	0.862059	-0.686705	0.2042
SYT2.TSS -82611	-intron (SYT2|AMEX60DD201008618.5, intron 3 of 11)	-1.37136	0.0217688	-0.152426	0.757744	-0.341619	0.532366	-0.292641	0.561141
TMEM132E.TSS +291874	-intron (TMEM132E|AMEX60DD201054346.1, intron 2 of 7)	-1.15163	0.0217789	-0.827215	0.0735653	-1.05518	0.0369167	-1.14839	0.0149125
PRPF3.TSS +359627	Intergenic	-1.05885	0.021787	-0.948972	0.0286677	-0.626443	0.171361	-0.494113	0.254866
SLC47A1.TSS -68674	Intergenic	1.83264	0.0217945	-0.317571	0.691849	0.659973	0.418392	-0.356257	0.658613
CPO.TSS -82104	Intergenic	1.00152	0.0217946	0.52341	0.212652	0.222191	0.628307	0.406164	0.340108
SLTM.TSS +40350	-intron (WDR70|AMEX60DD101041927.1, intron 12 of 16)	1.03245	0.0218105	0.499308	0.248068	0.177678	0.708861	1.02657	0.0174289
DCUN1D1.TSS -114534	Intergenic	1.0747	0.0218114	0.991281	0.0299251	0.728872	0.127097	0.49062	0.288038
PARPI_0014716.TSS +74886	-intron (PARD6A|AMEX60DD201015558.1, intron 3 of 3)	1.10499	0.0218562	-0.102144	0.828029	-0.499242	0.35383	0.20323	0.667257
CASR.TSS -29843	Intergenic	-1.56086	0.0218976	-1.74824	0.00735727	-1.79088	0.010209	-1.64049	0.0124771
ITGA3.TSS -39042	Intergenic	-1.34181	0.0219199	-0.455076	0.383902	-0.340239	0.541668	0.132224	0.799939
ANK2.TSS -262967	-intron (ANK2|AMEX60DD201044697.1, intron 2 of 49)	1.21885	0.0219499	-0.0845459	0.871645	0.950051	0.0805671	-0.048508	0.927169
PTHLH.TSS -909232	Intergenic	1.46233	0.0219586	0.692511	0.261472	1.46228	0.0231037	0.741206	0.234794
BHLHE40.TSS -12608	-intron (AMEX60DD301023578.1, intron 2 of 2)	1.37845	0.0219762	-0.344147	0.566593	-0.250675	0.700123	-0.0104581	0.986154
KLHL1.TSS -1950207	Intergenic	-1.51823	0.0219765	-0.700762	0.234811	-0.660019	0.298309	-0.911792	0.128384
NT5E.TSS +316855	-intron (NT5E|AMEX60DD301033778.1, intron 1 of 4)	2.18302	0.0219768	2.34728	0.0105935	1.78549	0.0668111	2.56263	0.00539479
MTIF3.TSS -8845	Intergenic	1.19661	0.0219847	0.557074	0.262873	0.730766	0.173776	0.374912	0.461779
CFAP45.S.TSS -84740	Intergenic	-1.25384	0.0220181	-0.485635	0.298107	-0.0993909	0.843259	0.132794	0.775069
KALRN.TSS +243365	-intron (KALRN|AMEX60DD201056078.10, intron 1 of 58)	-1.02037	0.0220246	0.283004	0.475006	-0.210997	0.622646	0.227301	0.569453
N/A.TSS -5489	Intergenic	1.84599	0.0220318	1.57373	0.0430857	0.34408	0.694146	1.72459	0.0274213
RAB37.TSS +2607	-intron (RAB37|AMEX60DD201030953.3, intron 1 of 8)	0.576938	0.0220337	-0.139021	0.568345	-0.0536323	0.838397	-0.0445633	0.856237
SCTR.TSS +68915	-intron (SCTR|AMEX60DD201056037.1, intron 4 of 8)	1.40802	0.0220589	-0.144586	0.81311	0.338458	0.599563	-0.367634	0.554777
ISM2.TSS +8945	-intron (ISM2, intron 2 of 11)	-1.48981	0.0221107	-1.13921	0.0459213	0.0564852	0.923949	-1.06038	0.0670141
CCDC69.TSS -58727	Intergenic	0.661595	0.0221468	0.0241038	0.932073	0.342404	0.245786	0.19413	0.494378
NTSR1.TSS -748501	Intergenic	-1.05138	0.0221473	-1.24028	0.00230617	-0.684209	0.12345	-0.481942	0.229074
ANK2.TSS -9542	-intron (ANK2, intron 20 of 45)	1.04283	0.0221831	0.889259	0.0403944	0.269922	0.573728	0.451211	0.308789
MMAB.TSS +419853	-intron (CENPK|AMEX60DD103042241.3, intron 9 of 11)	1.35041	0.0221938	0.551513	0.341096	1.31445	0.0275013	0.649441	0.265106
PEG10.TSS -540918	Intergenic	-1.39835	0.0221958	-1.28434	0.0205233	-0.879076	0.141062	-0.912186	0.1009
MGAT3.TSS +48218	-intron (MGAT3|AMEX60DD201029234.1, intron 1 of 1)	0.928262	0.0222108	1.4108	0.000341579	0.821396	0.0455645	1.30071	0.00100861
RFTN2.TSS +1084	-intron (RFTN2|AMEX60DD102055275.2, intron 1 of 9)	-0.975628	0.0222542	-0.676968	0.0671733	0.335662	0.386753	-0.919655	0.0161339
DRAXIN.TSS +7845	-intron (DRAXIN|AMEX60DD101051109.2, intron 1 of 7)	0.721793	0.0222584	0.804845	0.00740342	0.616166	0.0548362	0.724849	0.0168794
E1301_TTI023775.TSS +32476	-intron (SGCA, intron 47 of 65)	0.917409	0.0222637	0.297398	0.435974	0.886236	0.0285604	0.55648	0.147451
WDR49.TSS -15349	Intergenic	-0.925462	0.0222962	-0.459028	0.21886	-0.502707	0.209663	-0.667753	0.0779668
CUNH8ORF58.TSS -479	#NAME?	1.04237	0.0223581	1.48694	0.000461741	1.02193	0.0262715	1.46188	0.00064511
NEDD1.TSS +132641	-intron (NEDD1|AMEX60DD201007829.1, intron 1 of 11)	-0.847073	0.02241	-0.763914	0.0265321	-0.890664	0.0181076	-0.853852	0.0145574
ARSI.TSS -140882	Intergenic	-1.1222	0.0224246	-1.57529	0.000531197	-1.40415	0.00563272	-1.03647	0.0221956
KIAA0319.TSS +1616	-intron (KIAA0319|AMEX60DD201038567.1, intron 1 of 6)	0.55993	0.0224327	1.07353	5.87e-06	0.954649	9.66e-05	0.965104	5.03e-05
CELF4.TSS -7378	Intergenic	1.58447	0.0224757	0.0530019	0.938733	0.861949	0.23069	0.373569	0.589361
VAC14.TSS -31171	-intron (VAC14|AMEX60DD101015528.3, intron 15 of 19)	-1.19994	0.0224799	-0.264748	0.556892	-0.789114	0.121673	-0.165634	0.71603
ROBO2.TSS +340222	-intron (ROBO2, intron 16 of 54)	-1.64881	0.0224804	-0.208658	0.730902	-0.240684	0.713279	-0.129936	0.831879
PAH.TSS +185215	Intergenic	-1.43675	0.0224845	-1.07809	0.0515842	-1.00226	0.1018	-0.918426	0.100864
RBFOX3.TSS +178146		0.902087	0.0225024	0.511283	0.186008	0.107828	0.792385	0.158338	0.685353
HTT.TSS -195277		2.65243	0.0225034	-0.227889	0.845675	1.91975	0.101222	-0.00942337	0.993597
HCN2.TSS +31243	-intron (HCN2|AMEX60DD201013670.1, intron 1 of 7)	-0.801695	0.0225124	-0.268121	0.401012	-0.381474	0.270777	-0.285946	0.375842
RSPO2.TSS +218338	-intron (RSPO2|AMEX60DD301040292.1, intron 2 of 5)	-1.0307	0.0225126	-1.22818	0.00364151	-1.33517	0.00423806	-1.08734	0.0107726
UY3_02149.TSS -79550		-2.08159	0.0225418	-0.596835	0.451483	-0.570684	0.497167	-0.887527	0.269659
RIOX2.TSS -37080	Intergenic	-0.883885	0.0225437	-1.24116	0.00051742	-0.453995	0.232695	-0.996605	0.00571223
LMF1.TSS +446204	-intron (LMF1|AMEX60DD201020753.2, intron 4 of 8)	-1.0955	0.0225936	-0.960624	0.0308284	-0.553722	0.241068	-0.383158	0.388153
FGF4.TSS +161892	-exon (FGF4, exon 6 of 6)	-1.55595	0.022607	-1.14638	0.0687269	-1.09251	0.105129	-0.938083	0.138452
L1CAM.TSS -279176		-1.60856	0.0226152	-0.95469	0.128695	-0.61794	0.356398	-0.90724	0.153205
OPCML.TSS -28797	Intergenic	1.45299	0.0226303	-0.0933347	0.882941	-0.255173	0.711037	0.029962	0.962587
REN.TSS +255	-intron (REN, intron 1 of 7)	0.974298	0.0226308	0.662729	0.104965	0.606845	0.167524	0.481948	0.245443
NXPH3.TSS +8421	-intron (NXPH3|AMEX60DD201009962.1, intron 1 of 1)	0.711867	0.0226416	1.06553	0.000351365	0.795809	0.0114602	0.748705	0.0129643
MSH2.TSS +3032576	Intergenic	-1.09542	0.0226479	-0.896269	0.0473829	-0.726445	0.128943	-0.914485	0.0450257
DR999_PMT02922.TSS +24144	-intron (AGRN|AMEX60DD201051219.1, intron 1 of 35)	-1.42455	0.0226876	-0.278675	0.617668	-0.462576	0.439008	-0.321627	0.568031
SPIB.TSS +21317		0.789664	0.0226983	1.06809	0.00102508	1.08721	0.00163917	0.96146	0.00345798
LGR6.TSS +60492	-intron (LGR6|AMEX60DD201008623.1, intron 1 of 3)	0.956172	0.0227094	0.530455	0.197095	0.8815	0.0375821	0.143774	0.729426
ITGA6.TSS +211	-exon (ITGA6, exon 1 of 1)	1.27472	0.0227096	0.419961	0.437108	0.343331	0.562764	0.0506817	0.927487
SOX11.TSS +695	-exon (SOX11|AMEX60DD201033320.1, exon 1 of 1)	-0.652254	0.0227589	-0.400884	0.149976	-0.147878	0.604315	-0.601198	0.0318178
DR999_PMT13510.TSS +8401	-intron (DR999_PMT13510, intron 2 of 3)	1.66468	0.0227731	1.27332	0.0711906	1.94153	0.00787728	1.11038	0.120168
DMRT1B.TSS -412049		-1.79038	0.0227799	-0.557038	0.403993	-1.35941	0.074531	-0.418399	0.534023
PTPRF.TSS -157839		-1.09946	0.0227902	-1.12041	0.0136548	-0.596605	0.211486	-0.826319	0.0700114
N/A.TSS +328680	-intron (SLIT1|AMEX60DD201052864.1, intron 10 of 38)	-1.40545	0.0228063	-0.294789	0.574529	-0.599817	0.302687	-0.222417	0.675067
MGLL.TSS +361800	-intron (MGLL|AMEX60DD201023389.3, intron 6 of 8)	0.984873	0.0228218	0.690237	0.0898034	0.361555	0.422452	0.682538	0.0981181
CISD2.L.TSS +392932	Intergenic	1.44977	0.0228245	-0.587748	0.358737	0.13649	0.839395	-0.66032	0.310384
PHF1.TSS +20	-promoter-TSS (PHF1|AMEX60DD201010798.5)	1.15716	0.0228521	0.326876	0.512799	0.718939	0.166764	0.281677	0.575944
VH7.15M.TSS +12803	-intron (VH7.15M, intron 3 of 5)	1.24145	0.0228521	0.687165	0.192425	0.720401	0.201571	0.769472	0.147704
BN2614_LOCUS10.TSS -880567		-1.34128	0.0228596	-1.40438	0.0140864	-1.31098	0.0274939	-1.10165	0.0545879
AP4M1.TSS +1028988	-intron (STAG3, intron 48 of 74)	-1.11333	0.0228796	-0.685174	0.137994	-0.61838	0.202493	-0.465119	0.315693
ARHGEF17.TSS -21836	Intergenic	1.58717	0.0229102	0.530322	0.438732	0.736975	0.312109	0.779082	0.257574
WNT10B.TSS -341101	Intergenic	1.24931	0.0229533	-1.62697	0.00440406	-0.416263	0.485344	-0.776587	0.166643
SMIM1.TSS +19864	-intron (SMIM1|AMEX60DD201051382.1, intron 1 of 2)	1.01807	0.0229594	0.0433284	0.92169	0.351679	0.446099	0.286121	0.517808
STXBP6.TSS +454700	Intergenic	-1.14391	0.0229633	-0.665548	0.155792	-1.24158	0.0154724	-1.27423	0.00787064
AB205_0023540.TSS +10413	Intergenic	0.643897	0.0230135	0.247036	0.369694	0.499792	0.0821836	0.291826	0.292349
SGCG.TSS +125075	-intron (SGCG, intron 5 of 51)	-1.20524	0.0230173	-1.30958	0.00821747	-1.11438	0.0371249	-0.884266	0.0746952
PARPI_0010755.TSS -21754	-intron (EI555_000176, intron 1 of 5)	1.41842	0.0230508	-0.12638	0.83834	0.947753	0.139859	0.236318	0.703667
CHK1.TSS +1368645	Intergenic	-1.109	0.0230509	-0.422908	0.34471	-0.299104	0.527849	-0.232792	0.604767
CRH.TSS -143	-promoter-TSS (CRH|AMEX60DD201039827.1)	1.39869	0.0230694	0.027238	0.964448	0.316488	0.621228	-0.0163576	0.978834
FBXO10.TSS -313511	Intergenic	-1.12655	0.0230831	-0.815684	0.0746411	-0.513359	0.290624	-0.819967	0.07629
N/A.TSS +325559		-1.0696	0.0231393	-1.34741	0.00206757	-0.801023	0.0875399	-0.715066	0.10045
TMEFF1.TSS -165325	Intergenic	-0.750635	0.0231417	-0.521033	0.0966286	0.00677172	0.983372	-0.422356	0.180545
EYF80_031112.TSS +41635	-intron (NCS1|AMEX60DD301050357.1, intron 5 of 6)	1.60247	0.0231499	0.860745	0.210229	1.05627	0.146999	0.302309	0.668016
DTWD2.TSS -19107	-intron (DTWD2|AMEX60DD102042824.5, intron 1 of 4)	1.63375	0.0231599	0.7429	0.289676	0.191898	0.805724	1.04744	0.136892
PNCK.TSS +40758		1.292	0.0231753	0.31314	0.570534	0.277914	0.646685	0.941803	0.086393
MVB12B.TSS -490594	Intergenic	-1.61265	0.0231999	-1.19111	0.0698306	-1.57128	0.0287833	-0.843966	0.200041
FQN60_016711.TSS -243502	Intergenic	1.30913	0.0232103	0.170359	0.762596	-0.393109	0.54075	0.366145	0.519567
LRRC7.TSS -349704		-1.15178	0.0232371	-1.54673	0.00134745	-1.17143	0.0229361	-1.16518	0.0159859
ASZ78_016659.TSS -259699	-intron (ARHGAP10|AMEX60DD102045019.1, intron 4 of 22)	1.14739	0.0232457	0.899302	0.0629591	0.344739	0.517018	0.739575	0.131358
MDFIC2.TSS +741837	Intergenic	-0.93138	0.0233025	-0.847519	0.0301693	-1.12658	0.00728113	-0.556444	0.155848
SPOCK2.TSS -692907	Intergenic	-1.31485	0.0233482	0.23358	0.629594	-0.632133	0.249175	0.0222865	0.963876
DR999_PMT10418.TSS +279777	Intergenic	0.966147	0.0233521	0.0282886	0.945554	0.300844	0.498993	-0.100124	0.812346
NLRC3.TSS -835956	Intergenic	1.41668	0.0233537	-0.334846	0.591484	-0.135053	0.841496	-0.117408	0.851784
EOD39_6952.TSS +207809	Intergenic	-1.26473	0.0233579	-0.771164	0.131658	-0.67844	0.214637	-0.702054	0.173522
ADPGK.TSS -3735	Intergenic	-1.45569	0.0233794	0.504328	0.312872	-0.227737	0.686639	0.382627	0.450723
CERK.TSS -31232	-intron (CERK|AMEX60DD301007557.1, intron 8 of 12)	2.06333	0.0233814	1.06925	0.232488	1.92864	0.0363036	1.28968	0.151598
CUNH10ORF105.TSS +232	-exon (CUNH10ORF105, exon 1 of 2)	-1.02101	0.0233816	0.353715	0.383459	0.354205	0.405173	0.340291	0.404798
SLC4A3.TSS +223238	-intron (SLC4A3|AMEX60DD201056428.1, intron 6 of 22)	1.18525	0.0233961	0.594265	0.245982	1.16084	0.0278189	0.364057	0.481698
TFEB.TSS -103873	Intergenic	2.16949	0.023423	-1.00821	0.299883	2.00963	0.0366288	-1.40924	0.155734
ZNF438.TSS +863619	Intergenic	1.48925	0.0234242	0.447211	0.488865	1.30213	0.0509499	0.768726	0.23552
E1301_TTI005140.TSS +108038	Intergenic	-1.3123	0.0234441	-1.38858	0.00906224	-1.31175	0.02523	-0.660827	0.211052
ACTRT3.TSS +56284	Intergenic	1.31583	0.0234827	0.791792	0.153966	0.511948	0.401745	0.304641	0.594732
BRCA1.TSS +865667	Intergenic	-1.16998	0.0234868	-0.576387	0.217546	-0.164823	0.738475	-0.49935	0.289666
ROHU_009640.TSS -144325	Intergenic	1.33751	0.023487	0.862459	0.135699	0.898786	0.136294	1.12614	0.0519759
DV515_00002949.TSS +265543		-0.842542	0.0234936	-0.740852	0.03744	-0.487927	0.188866	-0.669308	0.0615881
DACH1.TSS -1886833	Intergenic	-1.69288	0.023496	-0.469851	0.474203	-0.0673004	0.922078	-1.55719	0.0228535
ZFPM1.TSS +130964	-intron (ZFPM1, intron 2 of 18)	0.918561	0.0235063	1.38484	0.000248567	1.41726	0.000392001	1.17912	0.00206531
EPB41L4A.TSS +2723	-intron (EPB41L4A|AMEX60DD201042755.2, intron 1 of 21)	1.54208	0.023527	-0.328048	0.630078	1.45555	0.0332259	-0.0728025	0.915052
VTN.TSS +1189	-intron (VTN|AMEX60DD201054883.1, intron 1 of 7)	0.840663	0.0235474	0.60626	0.0924385	0.675985	0.0730294	0.442721	0.2233
KDELR2.TSS -77956		1.04725	0.0235905	-0.0664479	0.882885	-0.18648	0.709918	0.180737	0.690678
ROHU_008242.TSS -89065	Intergenic	1.36736	0.0235908	0.809409	0.171084	0.127071	0.842351	0.635255	0.287109
EGR1.TSS -126719	Intergenic	0.984138	0.0235931	0.640509	0.124055	1.27131	0.00341481	0.881913	0.0350563
SFXN4.TSS -251974	Intergenic	1.70663	0.0236333	1.25398	0.086479	1.72744	0.0231511	0.900134	0.225765
MEGF8.TSS -230636	-intron (MONAX_5E043606, intron 23 of 23)	-1.19382	0.0236631	-0.902041	0.070823	-0.610547	0.241772	-0.947961	0.0596884
TENM3.TSS -2907	Intergenic	1.72734	0.0236713	0.0835978	0.912527	0.439306	0.58466	-0.816162	0.302606
SPTBN1.TSS +153813	Intergenic	1.69356	0.0236716	0.874162	0.234041	1.23048	0.108389	1.28948	0.0794986
TRNAU1AP.TSS -345625	Intergenic	-0.95255	0.0236869	-0.168838	0.671109	-0.114245	0.782101	-0.380752	0.342056
PRPH.TSS +283231	-intron (PRPH|AMEX60DD102029959.22, intron 18 of 32)	-1.35606	0.0237373	-1.1868	0.0326169	-0.832933	0.158303	-1.34791	0.01695
TXNL4B.TSS +139912	Intergenic	-1.40566	0.0237469	-1.41855	0.0114217	-0.673022	0.25946	-1.48862	0.00938898
TCF7.TSS -36650	-intron (TCF7, intron 16 of 60)	-1.38061	0.0237531	-0.818615	0.107461	-1.15813	0.0495658	-1.00075	0.0565558
TM4SF19.TSS +137782	-intron (AMEX60DD301002259.3, intron 2 of 2)	0.716807	0.0237607	0.0584062	0.848126	0.214976	0.513466	0.425441	0.164104
N/A.TSS -43941	Intergenic	-1.2867	0.0237699	-0.646977	0.159497	-0.148209	0.766754	-0.161018	0.725556
PDYN.TSS -155538	Intergenic	1.3351	0.0238123	-0.166647	0.776076	0.493995	0.423402	-0.228353	0.701178
LDLRAD1.TSS +631		1.60044	0.023814	-0.279164	0.693686	0.858785	0.235593	-0.367795	0.60763
DISP1.TSS +351659	Intergenic	-1.06509	0.023878	-0.200826	0.648044	-0.1442	0.753554	-0.501648	0.259148
PPRC1.TSS +850685	Intergenic	-1.09747	0.0238791	-1.08012	0.0167891	-0.833413	0.0856342	-1.41232	0.0022569
SYT17.TSS -25328	-intron (SYT17, intron 3 of 7)	2.08201	0.0239037	-0.661687	0.476723	-0.551412	0.572726	-0.678898	0.468716
LTBP1.TSS +328640	-intron (LTBP1, intron 12 of 133)	-0.866117	0.0239188	-0.280308	0.406841	-0.0267812	0.941411	-0.0726273	0.831063
NLGN2.TSS +116550	-intron (NLGN2|AMEX60DD201012742.1, intron 1 of 6)	-1.36393	0.0239505	-0.694389	0.218506	-0.0337263	0.953689	-0.857473	0.132271
PMCH.TSS -142603	Intergenic	0.732471	0.0239766	-0.0364059	0.907486	-0.0330814	0.92289	-0.0768857	0.808919
EML1.TSS +130286	-intron (EML1|AMEX60DD201011323.2, intron 1 of 22)	-1.32374	0.0239797	-0.0482064	0.916345	0.641521	0.187372	-0.390335	0.411209
ST3GAL1.TSS -258		-0.819288	0.0240209	-0.334896	0.330353	-0.445409	0.218474	-0.376685	0.276794
AGXT.TSS -310153	Intergenic	-1.86766	0.0240673	-1.18774	0.110404	-1.02219	0.19904	-0.815797	0.273959
ASZ78_016737.TSS -821400	Intergenic	-1.15967	0.024072	-1.27383	0.00887498	-0.332098	0.508802	-0.926871	0.0575713
CELAPHUS_00003793.TSS -35748	-intron (AMEX60DD301030052.14, intron 3 of 3)	-1.34102	0.0241022	-0.724448	0.193611	-0.850745	0.148711	-0.799276	0.154733
IFNG.TSS -343472	Intergenic	-1.01456	0.0241232	-0.554157	0.152139	-0.186489	0.657556	-0.766676	0.0543013
A6R68_11525.TSS +827395	Intergenic	0.910763	0.0241238	0.0934987	0.811693	0.680732	0.0987367	0.364044	0.355854
IQSEC3.TSS +133796	-intron (IQSEC3|AMEX60DD102006888.1, intron 1 of 13)	1.65775	0.0241286	0.00379286	0.995868	0.458011	0.555998	0.242707	0.74184
LRTM2.TSS +121298	-intron (CACNA2D4|AMEX60DD201006916.1, intron 25 of 37)	1.06672	0.0241376	0.639377	0.160661	0.466909	0.342297	0.89536	0.0504267
N/A.TSS +365722	-intron (LOC102363221, intron 24 of 102)	1.52563	0.024139	0.327076	0.623659	1.47551	0.0310104	0.74281	0.265737
IQSEC1.TSS -25676	-intron (IQSEC1|AMEX60DD201024042.1, intron 1 of 13)	-1.40148	0.0241491	-0.10807	0.839344	-0.491877	0.400913	0.0215032	0.968055
DR999_PMT11310.TSS -27237	-intron (PTPRT|AMEX60DD201028666.2, intron 7 of 9)	-1.04667	0.0241669	-0.404767	0.328997	-0.0414417	0.925113	-0.545436	0.19553
RNF32.TSS +24890	-intron (AMEX60DD102021626.3, intron 2 of 4)	-1.12291	0.0241722	-1.27047	0.00595864	-0.969144	0.0524357	-1.12614	0.0158064
SH3KBP1.TSS -778554	Intergenic	1.36045	0.0241903	0.649732	0.269578	0.902466	0.145676	0.449902	0.450759
TPRG1.TSS +18925	-intron (TPRG1|AMEX60DD201003184.1, intron 1 of 6)	0.887915	0.0242061	0.617408	0.102218	0.415966	0.307113	0.402402	0.293744
CSPG4.TSS +127686	-intron (CSPG4|AMEX60DD201003939.2, intron 1 of 2)	1.09186	0.0242449	0.554767	0.237654	0.572866	0.252362	0.447599	0.346234
IGSF11.TSS +2842	-intron (IGSF11|AMEX60DD201047013.3, intron 1 of 7)	-2.09203	0.0242453	-0.734796	0.379649	-0.202162	0.814666	-0.947391	0.261962
CORO1C.TSS +37234	-intron (CORO1C|AMEX60DD301000739.5, intron 1 of 10)	-1.28136	0.0242587	-1.415	0.00720578	-0.464622	0.398317	-1.08994	0.0393086
SF3A3.TSS -294352	Intergenic	-1.48979	0.0242895	-0.105357	0.848796	-0.374123	0.538017	-0.799738	0.16244
ARHGAP21.TSS -352570	Intergenic	-1.32424	0.0242931	-2.24623	6.02e-05	-1.28332	0.030717	-2.18017	0.000133787
KHDRBS2.TSS -268267	Intergenic	-1.66133	0.0243328	-1.29259	0.0585938	-1.03715	0.151902	-1.40098	0.0428989
SERPINE3.TSS +24652	-intron (SERPINE3|AMEX60DD201049112.1, intron 2 of 4)	1.67572	0.0243491	0.475921	0.516598	0.465698	0.555263	0.515519	0.486545
PARPI_0014716.TSS +1013924	Intergenic	-1.10178	0.024364	-1.17798	0.00827177	-1.45032	0.00427311	-0.711815	0.110533
NFIA.TSS -254155		-1.23451	0.0243679	-1.28445	0.0120263	-0.659248	0.221161	-0.96313	0.0606598
TMTC2.TSS +338164	-intron (TMTC2|AMEX60DD301007666.1, intron 2 of 11)	0.989302	0.0244081	-0.0165826	0.969086	0.0505569	0.913729	-0.169151	0.698388
NIPA1.TSS -1610	Intergenic	1.31487	0.0244336	1.21879	0.0303112	1.56983	0.00728686	1.07855	0.0576086
AK1.TSS -540	#NAME?	1.45031	0.0244471	0.171279	0.788463	-0.717494	0.314868	0.0246123	0.969605
COPZ1.TSS +746324	Intergenic	-1.19022	0.0244682	-0.468355	0.295292	-0.186979	0.701099	-1.035	0.027091
WIPF3.TSS -70781		1.43375	0.0244866	-0.0109899	0.986142	0.207549	0.757254	0.0488548	0.938979
ATP1A1.TSS +8353	-intron (LOC100564542, intron 1 of 10)	-1.23989	0.0244902	-0.618276	0.227815	-0.809254	0.138829	-0.961204	0.0645409
LY86.TSS +338655	-intron (LY86, intron 2 of 20)	1.59866	0.0245025	-0.521862	0.465085	-0.29953	0.693209	-0.316236	0.659772
CHRDL1.TSS +815791	Intergenic	-1.22104	0.0245094	-1.16611	0.0225564	-0.836235	0.121504	-1.02097	0.0472851
CCDC152.TSS -986161	Intergenic	1.34398	0.0245115	-0.213886	0.71806	0.457432	0.468491	0.659165	0.258693
LTBP2.TSS -254447	Intergenic	0.82457	0.0245273	0.090869	0.795113	0.413417	0.274259	0.143124	0.686961
MYO15A.TSS +649062		-0.943565	0.0245438	-0.363486	0.342797	-0.138586	0.733122	-0.488283	0.208391
SLITRK4.TSS -347144	Intergenic	-0.754046	0.0245518	-1.05496	0.000658326	-0.833117	0.014461	-0.734427	0.0183077
CELAPHUS_00002311.TSS +159878	Intergenic	-1.40043	0.0245525	-0.13579	0.790732	0.599794	0.26457	-0.153969	0.766823
ATP5MG.TSS +825987	Intergenic	1.3226	0.0245666	-0.323521	0.580872	0.13653	0.82641	0.0255895	0.965275
TFAP2E.TSS +22621	-intron (TFAP2E, intron 2 of 5)	-1.53919	0.0245689	-0.496204	0.409657	0.85393	0.163584	-0.785075	0.200019
SCN2B.TSS -815	-promoter-TSS (SCN2B|AMEX60DD201053897.1)	0.75218	0.0245973	0.829246	0.00979624	0.79545	0.0185262	0.892668	0.00569563
ATP5MG.TSS -69721	Intergenic	-0.937412	0.0246062	-0.538664	0.168447	-0.608109	0.143758	-0.425709	0.279234
GNG13.TSS +43188	-intron (GNG13|AMEX60DD201020758.1, intron 1 of 2)	1.46798	0.024627	0.250872	0.696223	0.308195	0.657884	0.305442	0.638289
TTYH3.TSS -83345	-intron (TTYH3|AMEX60DD201021180.1, intron 1 of 14)	-1.89579	0.0246334	0.231893	0.717066	0.417218	0.542602	-0.247949	0.706151
PLEKHG1.TSS +60465	-intron (PLEKHG1|AMEX60DD201035568.1, intron 1 of 17)	-1.6542	0.0246592	0.110694	0.850542	0.276493	0.660647	-0.443079	0.464204
BNC2.TSS +7870		1.44159	0.0246649	1.47799	0.0157267	1.1129	0.090348	1.61066	0.00885295
LRRN2.TSS -8539	-intron (LRRN2|AMEX60DD201009066.1, intron 1 of 2)	-0.892149	0.024665	-0.554265	0.119691	0.0283328	0.940252	-0.708135	0.0513723
KIF5A.TSS +135164	-intron (KIF5A|AMEX60DD101029773.3, intron 1 of 29)	1.57082	0.0247134	1.10955	0.100378	0.811146	0.266899	0.755879	0.271765
PEAR1.TSS -185378	Intergenic	-1.32981	0.0247374	-1.30999	0.0124949	-1.2568	0.033277	-1.06857	0.043516
AB205_0110550.TSS -216	-promoter-TSS (RHOQ|AMEX60DD301035929.4)	-0.668221	0.0247383	0.429179	0.106447	-0.253667	0.386173	0.248339	0.356113
LRRC32.TSS +3252	-intron (LRRC32|AMEX60DD201049736.1, intron 1 of 2)	-1.9134	0.0247451	-0.922344	0.218404	-0.239867	0.758905	-1.24398	0.103503
MGC115312.TSS -2070	-intron (KLHL41|AMEX60DD301055633.1, intron 1 of 5)	1.31287	0.0247567	0.625527	0.265892	0.643313	0.291616	0.633421	0.266227
DR999_PMT12225.TSS -190081	Intergenic	1.33019	0.0247602	-0.0140645	0.98076	0.227243	0.719653	0.619988	0.285168
AKAP14.TSS +123019	Intergenic	0.806218	0.0247663	0.451812	0.189827	0.581794	0.112792	0.645247	0.0626063
NPPA.TSS -9427	Intergenic	1.37934	0.0247684	0.81347	0.171696	0.895802	0.157287	0.523706	0.38691
ALK.TSS +222419	Intergenic	1.32351	0.0247897	-0.563336	0.340547	0.0511299	0.935081	-0.455956	0.445682
ZNRF1.TSS +155963	-intron (ZNRF1|AMEX60DD201015616.1, intron 1 of 4)	-1.31764	0.0247974	-0.965846	0.0659273	-0.442674	0.429179	-0.588173	0.264042
COL2A1.TSS -660570	Intergenic	-1.46313	0.0248079	-0.698709	0.217535	0.0159984	0.978587	-0.612665	0.284853
GDF10.TSS -273346	Intergenic	-0.846315	0.0248224	-0.0330521	0.92555	-0.0499225	0.892553	-0.408902	0.252988
MBIP.TSS -201619	Intergenic	1.2804	0.02486	-0.191608	0.735718	0.373128	0.526127	-0.278333	0.627217
IQSEC2.TSS +45986		1.29205	0.0248719	0.370025	0.514368	0.52541	0.376853	0.310097	0.587787
NRROS.TSS +420	-intron (NRROS, intron 2 of 5)	1.46724	0.0248734	-0.579239	0.379606	0.858105	0.203892	0.141325	0.828896
PARPI_0008565.TSS -177136	Intergenic	0.780577	0.024883	-0.0164155	0.961312	-0.220027	0.551507	0.0368639	0.914093
EFCAB6.TSS +204497	-intron (EFCAB6|AMEX60DD201006437.1, intron 6 of 6)	-0.870454	0.0248852	-0.768911	0.0321973	-0.437738	0.253515	-0.574608	0.111935
ANKRD65.TSS +75082	-intron (ANKRD65|AMEX60DD301051274.1, intron 1 of 3)	1.32807	0.0249175	1.49014	0.00803202	1.3567	0.0230539	0.801112	0.163956
STK32A.TSS -357	#NAME?	-1.32783	0.0249418	-0.93733	0.073493	-0.731093	0.200674	-0.485477	0.354179
CBLN1.TSS +29125		-0.947445	0.0249676	-1.07614	0.00512319	-0.802366	0.0571197	-0.50916	0.183746
CELF6.TSS +90628	-intron (CELF6, intron 21 of 482)	-1.30009	0.0250113	-1.36432	0.00998099	-0.771692	0.173153	-1.02777	0.053289
KCNJ5.TSS +61599	-intron (KCNJ5|AMEX60DD201053593.1, intron 2 of 2)	0.630102	0.0250156	1.03086	0.000155913	1.02468	0.000262456	0.934451	0.00064413
KIF21B.TSS +215540	Intergenic	-1.48989	0.0250484	-1.47224	0.0144287	-0.885285	0.169809	-0.863904	0.149335
FGF12.TSS +1780	Intergenic	-1.20981	0.0250558	-1.45274	0.00347336	-1.24192	0.023268	-1.50315	0.00304865
TGM4.TSS -401	-promoter-TSS (TGM4|AMEX60DD201022062.1)	-1.5044	0.025082	-0.660486	0.257658	0.0464304	0.939589	-0.698088	0.238174
SLC13A2.TSS -68	#NAME?	-1.46127	0.0250852	-1.60008	0.00815885	-2.04483	0.00301702	-1.55656	0.0111137
PDZRN3.TSS -424706	Intergenic	0.800406	0.0250938	1.27833	0.000212292	1.31192	0.000225182	1.04536	0.00261056
FGFRL1.TSS +251642		0.963797	0.0250983	0.710858	0.0864276	0.799163	0.0679736	0.759342	0.0689973
HNMT.TSS +909594	Intergenic	1.28675	0.0251057	-0.582047	0.31166	0.00284677	0.996257	-0.389055	0.501903
TNFAIP8L3.TSS +167655	-intron (TNFAIP8L3|AMEX60DD201003722.1, intron 1 of 1)	1.67592	0.0251126	0.292082	0.692778	1.70975	0.023444	0.944373	0.199365
OLFM3.TSS +552	-intron (OLFM3|AMEX60DD301018815.1, intron 1 of 5)	-0.534104	0.0251165	-0.248965	0.276053	-0.44917	0.0617749	-0.279173	0.224741
DPX16_4744.TSS -512502	Intergenic	-1.38275	0.0251169	-0.97884	0.0690236	-1.2965	0.0349722	-0.792941	0.144761
CHK1.TSS -216474	Intergenic	-1.34612	0.0251233	-1.03104	0.0463253	-0.752871	0.187187	-0.903874	0.0851234
COL1A1.TSS -747367	Intergenic	0.966026	0.0251663	0.634271	0.131756	0.712619	0.104463	0.297399	0.484595
FGF12.TSS -10432	Intergenic	0.740986	0.0251748	0.59994	0.05465	0.691576	0.0390461	0.51479	0.103907
DUI87_10362.TSS +214829	Intergenic	0.924809	0.0251976	0.494027	0.214115	1.14138	0.00584689	0.86233	0.0304655
AHI1.TSS +716827	-intron (AHI1|AMEX60DD201034352.1, intron 12 of 25)	1.46263	0.0252512	0.115019	0.85875	-0.0392294	0.955682	0.441108	0.496367
WNT9A.TSS +85425	-intron (WNT9A|AMEX60DD301020504.1, intron 1 of 3)	1.9369	0.0252661	2.45333	0.00271842	1.92152	0.026955	1.87059	0.0245909
NTM.TSS -201438	-intron (LOC111165522, intron 1 of 4)	0.906052	0.0252684	0.332435	0.399308	0.421758	0.311454	-0.0936773	0.815433
DCHS2.TSS -87678	Intergenic	1.3923	0.0252832	-0.24796	0.688837	-0.356929	0.605866	0.113303	0.855276
OSTN.TSS +154009	-intron (UTS2B.L, intron 2 of 4)	-1.59947	0.0253516	-1.06492	0.0954416	-1.1576	0.0987875	-0.994525	0.123475
ERCC6L.TSS +611		-0.971779	0.025357	-0.623449	0.129164	-0.824763	0.0593193	-0.775795	0.0615306
FZD9.TSS -516795	Intergenic	1.70002	0.0253653	-0.116958	0.877754	0.393586	0.619171	-0.375946	0.625913
RPS2.TSS -132385	Intergenic	-1.0395	0.0253855	-1.4805	0.000669863	-1.35182	0.00495281	-1.2932	0.00326236
SH3D21.TSS +122383	Intergenic	-1.12871	0.0253906	-0.644197	0.145552	-1.01491	0.0434039	-0.611644	0.17325
AV530_008533.TSS +112521	-intron (AV530_008533, intron 1 of 2)	-1.39004	0.0254045	-1.05279	0.0572014	-0.992887	0.103242	-0.660972	0.233569
IL10RA.TSS -311385	Intergenic	-1.47627	0.025433	0.633719	0.223547	0.110569	0.847116	0.0297301	0.955675
SIRT4.TSS +54289	Intergenic	0.803484	0.0254525	0.387864	0.266749	0.534326	0.145294	0.339922	0.334438
DKFZP469M1232.TSS +605046	Intergenic	-1.25295	0.025477	-1.40588	0.00794398	-0.576678	0.295055	-1.47441	0.00601442
EYF80_031112.TSS +40231	-intron (NCS1|AMEX60DD301050357.1, intron 5 of 6)	1.88372	0.0254804	1.5638	0.0567932	1.94992	0.0216214	1.49812	0.0700083
RGR.TSS +553	-intron (RGR|AMEX60DD301052006.1, intron 1 of 6)	-0.915601	0.0254811	-0.523515	0.159934	-0.919105	0.0266576	-0.25617	0.493806
CRHR2.TSS +14181	Intergenic	-1.00336	0.0255125	-0.548874	0.197071	-0.641034	0.152512	-0.496222	0.246151
CACNA1H.TSS -146701		1.61355	0.0255149	0.416991	0.557276	0.256918	0.741015	0.75136	0.291842
CCDC3.TSS +68020	Intergenic	0.903491	0.0255235	0.832321	0.0334971	1.06825	0.00857912	0.772154	0.0501199
LMF1.TSS +940842	-intron (LMF1|AMEX60DD201020753.2, intron 8 of 8)	-1.47949	0.0255236	-1.10799	0.0512467	-0.987203	0.119448	-0.36506	0.516274
CBX4.TSS -4557		-0.790935	0.025535	0.625008	0.0639507	0.769735	0.0251667	0.560872	0.0974369
CSPG4.TSS -133266	-intron (CSPG4|AMEX60DD201003939.2, intron 1 of 2)	1.43443	0.0255702	0.76652	0.216801	1.20403	0.0660361	0.801449	0.201371
PARPI_0016114.TSS +229363	Intergenic	1.01073	0.0255991	0.557939	0.198185	0.394019	0.404026	0.81094	0.0627452
NLGN3.TSS +64655	-intron (NLGN3|AMEX60DD201036828.1, intron 3 of 7)	-1.31548	0.0256409	-0.648656	0.208969	-0.257144	0.641667	-0.46121	0.375471
SYNE1.TSS +22687		-1.35598	0.0256433	-1.40934	0.013139	-0.966914	0.1089	-0.930242	0.101669
AB205_0070700.TSS -77191		1.28208	0.0256603	0.489695	0.390131	0.520163	0.373886	0.584658	0.306148
PLG.TSS -60	-promoter-TSS (PLG|AMEX60DD201034920.2)	-1.20199	0.025679	-0.208005	0.649567	-0.0442917	0.928763	-0.0141974	0.975446
INPPL1.TSS +242439	-intron (INPPL1|AMEX60DD201049864.1, intron 1 of 27)	1.58289	0.0256826	0.997653	0.149182	1.18129	0.10395	0.897402	0.198847
LRP2BP.TSS +184559	-intron (LRP2BP|AMEX60DD201045401.1, intron 4 of 8)	-1.10196	0.0256997	-1.03546	0.0268066	-1.35224	0.00768762	-0.999395	0.034024
RPL9.TSS -211150	Intergenic	-1.32712	0.0257154	-1.15783	0.0238445	-0.470665	0.393848	-0.792561	0.123298
TAF1A.TSS +507814	Intergenic	-1.13242	0.0257413	-0.72	0.112222	-0.332466	0.493991	-0.271927	0.548864
GLI1.TSS +4260	-intron (GLI1|AMEX60DD201029758.1, intron 1 of 11)	-1.45896	0.0257419	-0.290023	0.621374	0.535063	0.375133	-0.610111	0.30553
IL17RD.TSS +320780	Intergenic	-1.41726	0.0257517	-0.855549	0.140078	-0.606297	0.324439	-0.636256	0.274998
FAM241A.TSS -127238	Intergenic	1.58761	0.0257615	0.183336	0.79527	-1.2199	0.139311	-0.0477725	0.946882
PARPI_0017648.TSS +83243	-intron (PARPI_0017648, intron 12 of 15)	0.72613	0.0257825	0.177236	0.568942	0.335209	0.318565	0.106328	0.73661
COL7A1.TSS +31282	-intron (COL7A1|AMEX60DD301023359.1, intron 8 of 13)	-1.51787	0.0257895	-1.20192	0.0471033	-0.223332	0.724079	-1.22726	0.0462712
MICAL1.TSS -20456	Intergenic	-1.39803	0.025793	-0.485451	0.364714	0.0729869	0.897782	-0.050435	0.925046
EIF2B2.TSS -100714	Intergenic	1.4831	0.0257935	0.60665	0.347594	2.34055	0.000330738	0.548141	0.403097
CCK.TSS +449749	Intergenic	0.983791	0.0258029	0.046734	0.91253	0.216448	0.64149	0.392851	0.357504
BCORL1.TSS -241285	Intergenic	1.37878	0.025817	-0.968249	0.123491	-0.698705	0.309771	-0.476219	0.448246
CSMD1.TSS -223995	-intron (LOC102386534, intron 26 of 29)	-1.39122	0.0258188	-1.2238	0.028372	-0.970062	0.112066	-1.17944	0.0374824
ECE1.TSS -303679	Intergenic	-1.27569	0.0258754	-0.299385	0.565554	-0.809999	0.151466	-0.460391	0.381927
PAX5.TSS +124866	-intron (PAX5|AMEX60DD201043936.1, intron 6 of 9)	-1.33478	0.0259066	-0.595604	0.28893	-0.979704	0.100951	-0.559973	0.321429
INKA2.TSS -3185	-intron (AMEX60DD301008924.2, intron 1 of 2)	1.4427	0.0259108	0.694285	0.272499	0.575644	0.395281	0.247587	0.701152
PROM2.TSS -116705	-intron (PROM2, intron 17 of 25)	0.877401	0.0259502	0.159847	0.673063	-0.0179891	0.965727	0.6382	0.0919393
DLG3.TSS -98906	Intergenic	1.43695	0.0259582	0.310816	0.622899	0.386163	0.573196	0.546109	0.390533
ROHU_000710.TSS -174332		1.52196	0.0259955	1.41078	0.0294813	0.359391	0.62339	1.74135	0.00735785
C5H1ORF127.TSS +809077	Intergenic	1.16586	0.0260213	0.781221	0.123843	0.216268	0.695111	0.734603	0.1514
OCM4.4.L.TSS -190841	Intergenic	-0.924046	0.0260254	-0.705769	0.0717296	-0.493048	0.231965	-0.595579	0.130955
ITGB8.TSS -6	-promoter-TSS (ITGB8|AMEX60DD201022278.1)	-1.70085	0.026026	-2.99008	6.67e-05	-0.926871	0.217372	-2.77999	0.0002382
UY3_04341.TSS -705978	Intergenic	-1.63231	0.0260275	0.416323	0.458855	-0.189734	0.763484	0.165523	0.772702
LLAP_545.TSS -90500		-0.631486	0.026057	-0.218144	0.395418	-0.142528	0.607984	-0.330139	0.205617
MLN.TSS +52142	-intron (MLN|AMEX60DD301008739.1, intron 1 of 3)	0.855837	0.0260609	0.31653	0.398379	0.763186	0.0501224	0.419135	0.266216
PRPH.TSS -120298	Intergenic	-1.30615	0.0260684	-1.11078	0.0276433	-0.96914	0.08679	-0.49542	0.322276
DR999_PMT02045.TSS +1604	-intron (DR999_PMT02045, intron 1 of 1)	-0.716153	0.0261625	0.406772	0.18708	0.49658	0.115124	0.35735	0.248009
LRRC27.TSS +71677	-intron (LRRC27, intron 2 of 4)	-1.45032	0.0261645	-0.984816	0.0762239	-0.595281	0.32623	-0.39352	0.476402
PAX2.TSS -1221130	Intergenic	-0.726412	0.026168	-0.0965114	0.756471	-0.151265	0.640375	-0.110274	0.724412
ADCY3.TSS +369622	-intron (ADCY3|AMEX60DD201032746.1, intron 2 of 19)	1.53883	0.0261716	1.46612	0.0277895	1.95868	0.00447535	1.22598	0.0688382
TMEM218.TSS -492459	Intergenic	-1.22702	0.0261726	-0.907115	0.076633	-1.13008	0.0422227	-0.969897	0.0612374
NPR1.TSS -41866	-intron (NPR1|AMEX60DD201015014.1, intron 1 of 21)	1.89341	0.0261867	-0.189002	0.82517	1.10225	0.206976	0.243937	0.775772
IGLON5.TSS +201599	-intron (IGLON5, intron 2 of 22)	1.69026	0.0261913	-0.222915	0.769714	0.229315	0.773937	-0.419767	0.586817
RNF213.TSS +105826		-1.09829	0.0262131	-0.240472	0.610118	-0.529964	0.279639	-0.68544	0.149557
EOD39_1764.TSS +213763	-intron (EOD39_1764-HOMER2, intron 5 of 24)	0.655336	0.0262517	0.395535	0.164287	0.327191	0.279023	0.385851	0.178368
IGFALS.TSS -37730	Intergenic	-1.35895	0.0262885	0.0988879	0.852811	0.446508	0.423083	-0.302895	0.576273
MYO3B.TSS -168473	Intergenic	-1.68527	0.0262975	-1.01695	0.132018	-1.51506	0.0454743	-0.894388	0.189095
KRT222.TSS -185480	Intergenic	1.4165	0.0263242	1.01717	0.1019	1.27407	0.0486901	0.265048	0.676291
VMD2.TSS +69956	Intergenic	1.10525	0.0263395	0.0867608	0.860649	0.529582	0.293867	-0.193426	0.697408
STAMBPL1.TSS -743	-promoter-TSS (STAMBPL1|AMEX60DD201051126.1)	-0.855035	0.0263666	-0.554828	0.128404	0.070812	0.850804	-0.601225	0.102131
CB1_000726120.TSS +26448	-intron (CB1_000726120, intron 1 of 10)	1.30473	0.0263784	-0.112494	0.846639	0.128416	0.83697	0.572958	0.322375
GPR179.TSS -17221	Intergenic	-1.05605	0.0263977	-0.515613	0.243989	-0.157803	0.732926	-0.598007	0.180756
KNG1.TSS -21431	Intergenic	-1.12716	0.0264064	-1.64542	0.000392647	-1.39219	0.00756236	-1.0254	0.0257965
SLC44A4.TSS -49346	Intergenic	1.41998	0.0264091	0.731677	0.235354	1.35394	0.0363794	0.789468	0.205301
UBASH3A.TSS -63470	Intergenic	2.0929	0.0264112	-0.432762	0.648265	1.07152	0.263188	-0.168322	0.859561
OJAV_G00144360.TSS +101295	Intergenic	1.82955	0.0264873	-0.742721	0.37297	2.15844	0.00887648	-0.450068	0.590678
NPR1.TSS +77184	-intron (NPR1|AMEX60DD201015014.1, intron 1 of 21)	1.46185	0.0265257	1.17411	0.0639208	0.993982	0.143267	0.822916	0.201707
DNAJC22.TSS -371553	Intergenic	0.735177	0.0265679	0.257514	0.423216	0.294667	0.387591	0.0751815	0.817327
LINGO2.TSS +1963234	Intergenic	-1.05729	0.0265684	-1.0251	0.0230911	-0.686544	0.148251	-0.748645	0.0983072
N/A.TSS +15247		-1.18274	0.0265792	-0.916433	0.0648061	-0.414669	0.425506	-0.682847	0.170903
LYPD6.TSS +696	-intron (LYPD6|AMEX60DD201055872.1, intron 1 of 5)	-1.33246	0.0265833	-1.7062	0.00271094	-0.250103	0.666566	-2.11919	0.000294965
DACT3.TSS +309768	-intron (DACT3|AMEX60DD201024728.1, intron 2 of 3)	1.17983	0.026592	-0.343562	0.514636	0.379726	0.49613	-0.173837	0.744079
COL17A1.TSS +102626	-intron (AMEX60DD102053027.4, intron 4 of 4)	1.53164	0.0266093	0.60356	0.377073	0.497446	0.486155	0.311076	0.651952
CORO2B.TSS +8083	-intron (CORO2B|AMEX60DD301004229.1, intron 1 of 9)	-1.05686	0.0266175	0.63314	0.139461	0.379762	0.398189	0.398504	0.356209
KCNIP3.TSS +110296	-intron (KCNIP3|AMEX60DD102001201.3, intron 1 of 7)	1.12843	0.0266218	-0.264442	0.600999	-0.769463	0.160837	-0.17481	0.731154
GRIN2B.TSS -423437	Intergenic	-0.647693	0.0266223	0.255936	0.354938	0.219684	0.443569	0.212133	0.445456
FAM163A.TSS +1718	-intron (FAM163A|AMEX60DD201018679.1, intron 1 of 4)	0.597557	0.026636	0.178635	0.496073	0.288355	0.294693	0.199041	0.451168
MLANA.TSS +220452		-1.35731	0.0266665	-0.506505	0.345806	-1.36661	0.0269447	-0.398656	0.462089
CUNH1ORF216.TSS -472678	Intergenic	1.72789	0.0266765	0.519901	0.500496	1.16556	0.144068	0.539377	0.487873
LYPLAL1.TSS +668391	Intergenic	-1.0212	0.026679	-0.44946	0.288454	-0.0115961	0.979145	-0.664583	0.121756
SST.TSS +557509	Intergenic	1.38434	0.0267053	1.02974	0.0844622	1.26939	0.0449942	0.386215	0.530767
NFASC.TSS -187501	Intergenic	1.08529	0.0267688	0.821592	0.083157	0.902503	0.0701841	0.862267	0.0708208
RPL3L.TSS +358923	-intron (LOC101945813, intron 6 of 8)	0.734265	0.0267691	0.718262	0.0236396	0.993528	0.00275569	0.794279	0.0128872
CLIC5.TSS +344595	Intergenic	-1.09398	0.0267704	-0.77569	0.0872062	-0.981388	0.0482357	-0.730742	0.110744
PHYHIPL.TSS -67597	Intergenic	-0.866345	0.0267708	-0.991128	0.00774191	-0.333826	0.388716	-0.810222	0.0304176
SLC26A4.TSS -98146	Intergenic	1.81989	0.0267864	0.0421837	0.959035	0.90828	0.283565	0.768718	0.347521
HEY2.TSS +669588	Intergenic	1.01831	0.0267869	0.656437	0.137595	1.03769	0.0254616	0.68401	0.125158
CHST11.TSS +79123	-intron (CHST11|AMEX60DD201008366.1, intron 2 of 2)	1.13906	0.0267941	0.258745	0.603923	0.357523	0.508423	0.50103	0.318063
SLITRK2.TSS +970509	Intergenic	-1.17939	0.026798	-1.7099	0.000707211	-0.925943	0.0820301	-1.1992	0.0174185
PHB.TSS -17179	Intergenic	1.12707	0.0268118	0.354718	0.473162	1.09213	0.0339943	0.499433	0.316091
NCAN.TSS +3465	-intron (NCAN|AMEX60DD201013937.1, intron 1 of 16)	0.494215	0.0268127	0.65884	0.00247408	0.764548	0.000626872	0.541795	0.0132417
TBXT.TSS -147	#NAME?	-1.18756	0.026814	-0.431283	0.384506	-0.702502	0.185118	-0.334968	0.501851
EOD39_7363.TSS +89915	-intron (EOD39_7363, intron 7 of 119)	-1.08274	0.0268775	-0.742819	0.0894971	-0.661847	0.167119	-0.639032	0.148622
SEMA3A.TSS -65402	Intergenic	-1.43501	0.0268786	-1.04909	0.0802267	-1.67247	0.0122063	-0.614192	0.306205
ADCY8.TSS -782918	Intergenic	-0.925877	0.0268911	-0.845688	0.0311317	-0.896037	0.0343109	0.0465617	0.904917
SORBS3.TSS -3460	-intron (SORBS3|AMEX60DD201002839.1, intron 10 of 19)	1.44542	0.0269009	-0.470578	0.472902	0.404479	0.557013	-0.755091	0.263396
NEUROD2.TSS -204727	Intergenic	0.836578	0.026929	0.121859	0.741558	0.613031	0.111091	0.155202	0.676809
DOCK8.TSS +16708		1.43999	0.0269657	0.899007	0.150989	0.873078	0.195566	0.23866	0.712456
TIMM9.TSS -21552	Intergenic	-0.800558	0.027009	-1.44799	1.65e-05	-0.897849	0.014477	-0.367928	0.261033
KDM5A.TSS -99406	Intergenic	1.26501	0.0270186	0.332478	0.549295	0.217884	0.721212	0.583303	0.29636
B3GALT4.TSS -23911	Intergenic	1.36473	0.027046	1.94908	0.000726747	1.78151	0.00349273	1.47118	0.0121323
SAMD11.TSS +3739	-intron (LOC108696529, intron 2 of 9)	1.52313	0.0271045	1.28593	0.0526667	1.18245	0.093811	1.39007	0.0373596
CRLF1.TSS -263794	Intergenic	-0.919303	0.0271061	-0.903371	0.0179314	-1.07969	0.0111595	-0.665213	0.0834399
AMIGO1.TSS -253828	Intergenic	1.00865	0.0271102	0.338959	0.452415	0.476149	0.304947	0.289093	0.523488
CBLN1.TSS -30469		1.67412	0.0271203	0.135239	0.857325	1.14982	0.140152	0.565807	0.452389
USP21.TSS +313322	-intron (USP21, intron 11 of 37)	-1.03576	0.0271268	-0.373926	0.39228	0.0793391	0.860994	-0.261111	0.552315
DKKL1.TSS -29043	Intergenic	-0.983129	0.0271362	-1.14358	0.00678198	-1.04463	0.020931	-1.09029	0.010535
OST4.TSS +3486	-intron (OST4-HOMER2, intron 1 of 9)	-1.0128	0.0271665	-1.05025	0.0126512	-0.62802	0.165334	-1.07014	0.0124178
ESAM.TSS +31273	-intron (ESAM|AMEX60DD201054001.1, intron 1 of 6)	0.73221	0.0271725	0.608569	0.0506921	0.556413	0.0993617	0.42576	0.179223
IL17RB.TSS +243795	-intron (IL17RB, intron 4 of 11)	1.19547	0.0271786	-0.0590138	0.911509	-0.0995455	0.865241	0.408008	0.442149
SHANK3.TSS -166106	Intergenic	0.967539	0.0271918	0.0491304	0.909356	-0.337036	0.466675	-0.225532	0.605635
M6PR.TSS +347513	Intergenic	0.839174	0.0272245	0.0439203	0.904723	0.19327	0.62669	0.0746533	0.840809
GULP1.TSS +69319	-intron (CNTN2|AMEX60DD201009063.1, intron 22 of 22)	1.84303	0.0272277	1.19003	0.144681	1.69731	0.0447869	1.98184	0.0147673
BCL6.TSS -105697	Intergenic	-1.26471	0.027231	-0.478682	0.359969	0.36311	0.500042	-0.0823667	0.875015
RASAL1.TSS +34434	-intron (RASAL1|AMEX60DD201001012.1, intron 1 of 18)	1.42948	0.0272495	-0.118951	0.853509	-0.42655	0.543309	0.332487	0.605995
CHRDL1.TSS +13729	-intron (CHRDL1|AMEX60DD201037123.1, intron 1 of 9)	1.32843	0.0273029	-0.62122	0.304783	-0.112291	0.863423	-0.236796	0.696409
APBB2.TSS +158531		1.4857	0.0273041	1.64082	0.0103475	1.61464	0.016836	1.29897	0.045421
EDAR.TSS +46445	-intron (EDAR|AMEX60DD201047992.1, intron 1 of 5)	1.13545	0.0273107	0.454111	0.366539	0.19184	0.721968	-0.0297078	0.953751
ADAMTS17.TSS +241349	-intron (ADAMTS17|AMEX60DD201003517.1, intron 12 of 22)	1.18853	0.0273254	1.06008	0.04018	1.01774	0.0633465	0.418486	0.428574
PLP2.TSS -105030		-1.21166	0.0273477	-1.1578	0.0214688	-0.896771	0.0997166	-1.40293	0.00650811
ROHU_028354.TSS -255505	Intergenic	-1.69753	0.0273647	-0.277723	0.678557	0.695166	0.311686	-0.99914	0.146374
TSKU.TSS +3667	-intron (TSKU, intron 1 of 1)	-1.16547	0.027382	-1.62792	0.000754192	-0.16117	0.745797	-1.74155	0.000479023
PLXNA4.TSS +1462728	Intergenic	0.884705	0.0273883	0.368901	0.33606	0.310982	0.456644	0.163717	0.675453
RPRML.TSS +851154	Intergenic	0.912138	0.0273886	0.192402	0.629796	0.328342	0.445527	0.307554	0.445231
FILIP1L.TSS +215452	Intergenic	-0.968735	0.0274269	-0.0513588	0.892231	0.049508	0.903952	0.0352191	0.926733
ARAF.TSS -633780	Intergenic	1.62368	0.0274352	0.0469691	0.948875	0.573435	0.456922	0.333085	0.650683
SPAG8.TSS +117563	-intron (LOC115082284, intron 9 of 10)	-0.807304	0.0274685	-0.443246	0.197758	-0.4727	0.19549	-0.549564	0.11383
AAK1.TSS -342896	Intergenic	0.840174	0.0274744	-0.283639	0.444288	0.367143	0.352386	-0.0785943	0.833643
EIF2B2.TSS -105221	Intergenic	1.29017	0.0274818	0.508035	0.37037	0.515261	0.401132	1.02054	0.0716772
ESRRB.TSS -29520	Intergenic	0.714465	0.0274968	0.553916	0.0721944	0.837161	0.0102021	0.658861	0.0338171
POMT2.TSS +45215	-intron (DR999_PMT04084, intron 1 of 3)	1.70631	0.0274986	0.947919	0.210603	1.21989	0.124734	0.714235	0.351986
OJAV_G00236990.TSS -166025	Intergenic	1.58184	0.0275076	1.49507	0.027277	1.79246	0.0117524	1.54328	0.0239641
PAX5.TSS -913148	Intergenic	-0.709438	0.0275198	-0.906745	0.00214759	-0.685575	0.0345396	-0.433624	0.142028
ST8SIA4.TSS +282447	Intergenic	1.13654	0.0275311	-0.00374488	0.99407	0.364028	0.501569	0.504763	0.315744
FOXA3.TSS -135582	Intergenic	1.50932	0.0275452	1.20702	0.0672537	1.45542	0.0357166	1.51048	0.022401
PARPI_0006817.TSS +136806	-intron (PARPI_0006817-HOMER2, intron 9 of 11)	1.31235	0.0275489	0.231044	0.692981	0.0124993	0.984351	-0.0855033	0.886062
TLN1.TSS -78004	Intergenic	-0.855506	0.0275494	0.0716964	0.837963	0.263989	0.475307	0.168575	0.632902
PIK3R5.TSS +456	-exon (PIK3R5, exon 1 of 39)	-0.862818	0.027573	0.0903844	0.800313	-0.602986	0.122696	-0.21391	0.554713
FSTL4.TSS +333679	-intron (FSTL4|AMEX60DD102028911.2, intron 3 of 14)	-1.33305	0.0276031	-0.227791	0.65441	-0.352173	0.529628	-0.614662	0.240052
FCHSD1.TSS +7381	-intron (FCHSD1|AMEX60DD201030222.1, intron 1 of 19)	-0.950302	0.0276604	-0.554251	0.142195	-0.807667	0.0586973	-0.567472	0.139887
WNT4.TSS +394401	Intergenic	-1.41185	0.0277155	-0.749888	0.2209	-0.793783	0.211529	-0.820132	0.182912
WDR72.TSS +389073	-intron (WDR72|AMEX60DD201003676.1, intron 8 of 17)	-1.09818	0.0277279	-0.837596	0.0778715	-0.508289	0.303336	-0.504466	0.289223
N/A.TSS +888713	Intergenic	-1.24879	0.0277518	-1.24621	0.0174213	-1.46231	0.0121636	-0.875728	0.0956688
MAP1LC3C.TSS -611017	Intergenic	0.923299	0.0277546	0.0257219	0.94964	-0.213005	0.636863	0.271436	0.507637
EOD39_1764.TSS +1123	-intron (EOD39_1764-HOMER2, intron 2 of 24)	-0.734295	0.0277768	-0.310379	0.326759	-0.203114	0.539182	-0.363294	0.254405
SLC30A6.TSS +178644	Intergenic	1.28853	0.0277881	0.538585	0.353674	0.310241	0.604551	-0.0508547	0.930812
H355_009450.TSS +28507		-1.55401	0.0277932	-1.45494	0.0191147	0.0795571	0.900391	-1.18977	0.0573526
OPA3.TSS -113789	Intergenic	1.22055	0.027818	0.558739	0.29294	0.0785909	0.895288	0.754009	0.159042
TTLL4.TSS -1023742	Intergenic	-1.44308	0.0278296	-0.768733	0.162751	-0.774916	0.208172	-0.510411	0.357645
WARS2.TSS +264396	Intergenic	0.715287	0.027851	0.069861	0.823412	0.314359	0.348805	-0.0086503	0.978284
PLXNA4.TSS +2149903	Intergenic	-1.52472	0.027869	-0.936007	0.133252	-0.683608	0.304811	-0.461592	0.459124
SELE.TSS -35291	Intergenic	-0.761065	0.0278752	-0.479076	0.130056	-0.165555	0.624287	-0.652314	0.0428678
SLC29A1.TSS -4456		-1.11628	0.0278771	-1.07045	0.0249109	-0.740574	0.142478	-0.79957	0.0952661
NRXN2.TSS -220089	-intron (NRXN2|AMEX60DD201025259.1, intron 3 of 6)	0.736607	0.0278873	0.667458	0.0389354	0.64274	0.0585134	0.460223	0.158616
L345_02278.TSS -444037	-intron (CNGA3|AMEX60DD201047743.1, intron 4 of 6)	-0.84179	0.0278983	-0.626778	0.0755629	-0.820681	0.0340411	-0.0921546	0.793651
A2ML1.TSS +189934	-intron (A2ML1, intron 7 of 36)	1.00319	0.0279041	-0.190289	0.672284	-0.248125	0.609532	-0.144998	0.749502
ARL6.TSS +18191	-intron (ARL6|AMEX60DD301051802.1, intron 1 of 6)	1.09757	0.0279212	0.19858	0.686028	0.1734	0.738677	-0.292034	0.559145
DDC.TSS +105392	-intron (DDC|AMEX60DD201038234.1, intron 5 of 17)	0.917071	0.0279263	0.158256	0.695102	0.228605	0.600377	0.369019	0.363843
RBP2.TSS +36798	-intron (RBP2|AMEX60DD201002753.1, intron 2 of 4)	0.881966	0.0279288	0.342221	0.378626	0.243311	0.559742	0.504167	0.197235
AEBP1.TSS -90511	Intergenic	1.31281	0.0279419	0.34032	0.561321	0.422372	0.499197	-0.11949	0.841898
ANKRD9.TSS +161318	Intergenic	1.54771	0.0279496	-0.386678	0.583204	0.600407	0.400562	-0.646939	0.36211
FOXL2.TSS -616655	Intergenic	-1.25231	0.0280182	-1.49975	0.00427341	-1.02453	0.0711397	-1.27009	0.0164385
NTSR1.TSS -102079	-intron (NTSR1|AMEX60DD201026968.1, intron 1 of 2)	1.01766	0.0280227	-0.257726	0.57062	0.44486	0.35554	0.0479034	0.916473
SLIT2.TSS -200596		-1.46279	0.0280231	-0.849756	0.141943	-2.21712	0.00198717	-0.887793	0.13138
LRRC3B.TSS +1113		-0.549708	0.028024	-0.0426864	0.859766	-0.0422423	0.865333	-0.080551	0.739888
VWCE.TSS +4946	-exon (VWCE|AMEX60DD201004657.1, exon 1 of 29)	1.01556	0.0280325	0.126319	0.777006	0.112609	0.818622	-0.0990696	0.828608
SERPINE1.TSS -99746	Intergenic	1.10511	0.028037	1.55598	0.00103084	1.05443	0.0383813	1.08608	0.0241616
E1301_TTI023775.TSS +62895	Intergenic	1.40283	0.0280626	-0.255613	0.687742	-0.34075	0.629385	0.0313482	0.960906
TMEM268.TSS +1472	-exon (TMEM268|AMEX60DD201050830.1, exon 2 of 9)	-0.875644	0.0280654	-0.0628618	0.869981	-0.0850572	0.829178	-0.194113	0.614739
NECTIN1.TSS -549973	Intergenic	-1.38749	0.0280964	-0.0093336	0.986353	-0.394567	0.507081	-0.632321	0.258736
NEWT.TSS +233827	Intergenic	-1.37823	0.028112	-0.218715	0.695901	-0.887819	0.149024	-0.0668583	0.905403
NS.TSS -55938	Intergenic	1.24152	0.0281291	0.168385	0.760219	-0.39234	0.532039	-0.529659	0.359005
SEPT5IN.S.TSS +121361	-intron (SEPT5IN.S, intron 50 of 415)	0.955777	0.0281737	0.931946	0.0256545	0.0701386	0.878689	0.646488	0.126422
MEGF6.TSS +34040	-intron (MEGF6|AMEX60DD201051369.2, intron 1 of 34)	1.53956	0.0281786	0.281204	0.685427	0.0382916	0.959209	0.452521	0.516781
TAX1BP1.TSS +2009836	Intergenic	1.15609	0.0281997	1.06349	0.0320834	1.4048	0.00736177	0.65705	0.195965
CORIN.TSS -956228		-1.03101	0.028204	-1.22182	0.00593473	-1.1657	0.0151289	-1.04951	0.0189452
DQX1.TSS -112323		-1.39627	0.0282066	-0.860997	0.149362	-0.173772	0.777394	-0.926226	0.12391
ACP5.TSS +620		1.25469	0.0282452	0.674197	0.230241	0.662547	0.258274	0.111206	0.845285
N/A.TSS +362135	-intron (SLIT1|AMEX60DD201052864.1, intron 7 of 38)	0.963856	0.0282842	-0.0276122	0.949245	-0.103315	0.821622	0.626589	0.147873
GDF15.TSS +264112	Intergenic	-1.33749	0.0282897	-0.912094	0.0838855	-1.5771	0.0113596	-0.698771	0.18949
MGC64513.L.TSS -201290		-1.29538	0.0283172	-0.755335	0.156458	-0.377006	0.505281	-0.25207	0.63613
CDH3.S.TSS -20547	Intergenic	1.16625	0.0283367	0.331069	0.522093	-0.208017	0.718906	0.231848	0.658656
RHOU.TSS -405502		0.794976	0.0283443	0.554243	0.103479	0.74098	0.0430248	0.406106	0.241651
RORC.TSS +369819	Intergenic	1.51071	0.0283799	0.437539	0.520159	0.39074	0.588247	0.539125	0.430875
SORBS2.TSS -116344	-intron (LOC108698663, intron 1 of 20)	-0.98927	0.0283936	-0.301514	0.46138	-0.424671	0.336308	-0.432953	0.296474
CIB84_003306.TSS +1295802	Intergenic	-1.17992	0.0284355	-1.50709	0.00197001	-0.804905	0.125653	-0.588455	0.217707
RBFOX3.TSS -59940		-0.956091	0.0284446	-0.611764	0.111575	-0.184861	0.655767	-0.527659	0.175747
TLE3.TSS +270487	Intergenic	-1.32039	0.028472	-0.761427	0.154659	-0.752673	0.198	-0.441654	0.41094
ANK2.TSS +17010	-intron (ANK2, intron 2 of 45)	1.71404	0.0284858	0.273202	0.72579	0.0820802	0.920464	0.0137716	0.986037
HOXC11.TSS -116351	Intergenic	-1.16458	0.0284887	-0.655427	0.160081	-0.677754	0.188519	-0.786333	0.0987116
PIGR.TSS -95875	Intergenic	1.13512	0.0285106	0.340519	0.49778	0.56917	0.290021	0.461707	0.362222
ARID5A.TSS +33287	-intron (ARID5A, intron 1 of 3)	1.51494	0.0285425	0.222152	0.745055	1.15991	0.100833	0.49965	0.466534
ARSA.TSS -141211	Intergenic	1.01426	0.0285534	-0.225549	0.622794	0.430466	0.364676	-0.255293	0.581086
SPATA6L.TSS +120012	-intron (SPATA6L|AMEX60DD103043086.2, intron 2 of 14)	1.85049	0.0285956	2.2113	0.00638453	2.64713	0.00148453	2.48021	0.00226992
PIK3IP1.TSS -115151	Intergenic	-0.929036	0.0286078	-1.01088	0.0108258	-0.982833	0.0227577	-1.04663	0.00925984
CLCNKA.TSS +386812	-intron (FAM131C|AMEX60DD201052349.6, intron 4 of 6)	-1.28582	0.0286383	-0.0425499	0.9318	-0.366344	0.504548	0.106418	0.831805
DLEU7.TSS +1077381	Intergenic	-1.30421	0.0286811	-0.832191	0.124867	-0.308087	0.589419	-0.498428	0.359519
DPX16_21124.TSS -210260	Intergenic	-1.28021	0.0286943	-1.07528	0.0439899	-0.243995	0.662148	-0.838962	0.118395
IRX4.TSS +61751		0.768015	0.0287123	0.0478771	0.887775	0.826168	0.0196702	0.309512	0.364073
DISP1.TSS +563144	Intergenic	1.09097	0.0287452	-0.0234298	0.961638	0.341705	0.513804	-0.266155	0.594084
EOD39_1764.TSS -79292	Intergenic	-1.19051	0.0287639	-0.474323	0.346522	-0.828421	0.125972	-0.382046	0.450983
FURIN.TSS -30527	Intergenic	0.959584	0.0287784	1.46872	0.000329555	1.68817	8.23e-05	1.38143	0.000822661
RBM15.TSS -129458	Intergenic	1.11104	0.0287791	1.51914	0.00172935	1.59744	0.00154933	1.51068	0.00194937
CCDC141.TSS +72178	-intron (CCDC141, intron 25 of 133)	1.69727	0.0288276	1.20744	0.1084	1.46202	0.0644907	0.974699	0.201307
DMBT1.TSS -105282	Intergenic	-0.707656	0.0288473	-0.612766	0.0447221	-0.241364	0.452074	-0.759902	0.0139863
KIAA1500.TSS -193681		1.05524	0.0288556	0.603726	0.198225	0.202846	0.688174	0.145032	0.761265
DCDC2.TSS +187519	-intron (DCDC2, intron 3 of 9)	1.60277	0.0288623	0.985782	0.164852	1.5331	0.0388791	0.633405	0.381855
CREB5.TSS +86509	-intron (CREB5|AMEX60DD201021966.1, intron 2 of 6)	-1.61861	0.028869	-0.265297	0.653148	0.475708	0.444771	-0.273796	0.648017
LRFN1.TSS +64124	-intron (LRFN1|AMEX60DD201024349.1, intron 1 of 6)	-1.20752	0.028903	-0.221268	0.654957	-0.145088	0.782691	-0.115015	0.817518
ZBTB44.TSS +463461	Intergenic	-0.834694	0.0289256	-0.975954	0.00721203	-1.03714	0.00802756	-0.745989	0.0409778
FAM210A.TSS +161164	-intron (HSD17B3|AMEX60DD301043044.1, intron 4 of 11)	-0.878938	0.0289263	-0.386672	0.313805	-0.197089	0.620069	-0.618209	0.110258
LINC02210-CRHR1.TSS -451736	Intergenic	-0.816568	0.0289549	-0.623779	0.0603384	-0.663385	0.0735918	-0.449858	0.180109
BPNT2.TSS +876392	Intergenic	-0.883209	0.0289632	-0.146599	0.702444	-0.317851	0.427639	-0.0594358	0.877385
GPBAR1.TSS +134081	Intergenic	1.14193	0.0289974	-0.0168397	0.973763	-0.233611	0.681641	-0.174933	0.737864
RPS7.S.TSS -378305	Intergenic	-0.837576	0.0289993	-0.604543	0.0987397	-0.132319	0.726654	-0.476354	0.195348
FAM216A.TSS +1578	-intron (FAM216A|AMEX60DD201000666.1, intron 1 of 7)	1.06792	0.0290391	0.734415	0.115619	1.02993	0.0374425	0.124945	0.795163
CPNE6.TSS +132526	-intron (CPNE6|AMEX60DD201009487.1, intron 1 of 15)	1.0984	0.0290932	0.228655	0.643444	0.188815	0.719451	0.219216	0.659918
SPATA25.TSS +94478	Intergenic	1.69167	0.0291053	0.225986	0.769038	0.315074	0.702235	0.476767	0.537508
TMEM150B.TSS +11883	-intron (TMEM150B|AMEX60DD201017454.1, intron 1 of 6)	1.0587	0.0291091	0.286173	0.543979	0.744362	0.134114	0.609394	0.197741
AB205_0067090.TSS +184	-intron (AB205_0067090, intron 1 of 4)	1.15386	0.029129	0.433918	0.390413	0.479731	0.384421	-0.0183888	0.972049
TMEM132B.TSS -110358	Intergenic	-1.547	0.0291456	-1.17364	0.0686836	0.276774	0.673436	-0.616556	0.338097
SCNN1B.TSS +4884	-intron (SCNN1B|AMEX60DD201020929.1, intron 1 of 12)	0.883984	0.0291457	0.608673	0.118091	1.11393	0.00607903	0.515873	0.190089
TMEM200B.TSS -355124	Intergenic	-0.852383	0.0291538	-0.946652	0.00917719	-0.730643	0.0629208	-0.585068	0.108395
RAB28.TSS -348402		-1.35722	0.0291546	-1.24964	0.028983	-0.382456	0.521998	-1.13138	0.0502336
H671_3G8553.TSS -391709	Intergenic	-0.8998	0.0291717	-0.900333	0.018546	-1.25826	0.00328074	-0.970316	0.0124752
EOD39_2603.TSS -3664	Intergenic	1.30059	0.0292038	-1.02199	0.0903136	0.203125	0.743796	-1.16033	0.0592527
ATP6AP1L.TSS +723236	Intergenic	-1.02704	0.0292871	-1.40044	0.00168931	-1.48022	0.00257606	-0.986792	0.027176
AB205_0017970.TSS -135330	-intron (LZTS1|AMEX60DD201002836.1, intron 1 of 3)	1.23221	0.0292901	0.281448	0.609557	0.00733323	0.990379	0.629803	0.25451
COX2.TSS -319192		-0.831158	0.0293074	-1.25472	0.000351302	-0.972908	0.012262	-1.11202	0.00179011
TJAP1.TSS +148467		1.16385	0.0293403	1.27198	0.0148238	1.28483	0.0166762	1.00897	0.0546702
HES5.TSS +398	-intron (AMEX60DD301051346.1, intron 1 of 1)	1.39377	0.0293447	0.568485	0.370171	0.574981	0.378124	0.595942	0.349096
RIIAD1.TSS -228370	Intergenic	1.49827	0.0293733	0.438267	0.512084	0.993672	0.160866	1.46977	0.0253499
OSTN.TSS +2458	-exon (OSTN|AMEX60DD201003207.1, exon 1 of 4)	1.08134	0.0293911	-0.00457998	0.992502	0.0535284	0.918756	0.336215	0.491532
GSONMT00010417001.TSS +210907	-intron (CAMTA1|AMEX60DD201051565.2, intron 1 of 2)	0.788234	0.0294299	0.477886	0.168344	0.395161	0.289342	0.541381	0.121708
RNF208.TSS +724942	Intergenic	-1.26777	0.0294398	-0.321475	0.504411	-0.496616	0.357478	-0.325322	0.506541
TXPB_URIBO1.TSS +80892	Intergenic	-0.853003	0.029441	-0.547081	0.145996	-0.850752	0.0317443	-0.547332	0.14793
FIGNL1.TSS +126555	-exon (DDC|AMEX60DD201038234.1, exon 18 of 18)	-1.72992	0.0294747	-0.714629	0.278818	0.0509539	0.941635	0.161095	0.805128
CHN1.TSS -66855	-intron (CHN1, intron 6 of 11)	-1.33535	0.0294871	0.200766	0.70074	0.0361787	0.948689	0.443701	0.397678
FAM71E1.TSS +217840		1.5216	0.0295156	1.80853	0.00613484	2.04806	0.00297685	1.55727	0.0198153
DMRT1B.TSS -515002		-1.22768	0.0295556	-0.587683	0.237643	-0.38579	0.472651	-0.811294	0.110426
ROHU_009882.TSS +456200	Intergenic	-1.16257	0.0295565	-1.97506	0.000108	-1.29118	0.0180172	-1.59371	0.0018403
ASZ78_015360.TSS -372188	Intergenic	-1.07517	0.0295642	0.648387	0.154023	0.538852	0.251465	0.214083	0.640604
PRDM12.TSS -542575	Intergenic	1.08579	0.0295967	0.481175	0.324153	0.449497	0.382908	0.451049	0.359029
KIF26A.TSS -63569	Intergenic	0.704044	0.0296046	0.847546	0.0053502	0.866691	0.00756208	0.730812	0.0176591
SYT5.S.TSS +8802	-intron (SYT5.L, intron 5 of 54)	-1.47942	0.0296078	-0.236292	0.704534	-0.397814	0.543437	-0.185418	0.767171
N/A.TSS +85252	Intergenic	-0.835855	0.0296079	-0.428562	0.236436	-0.0800778	0.831831	-0.588079	0.107784
MVB12B.TSS -524707	Intergenic	1.30446	0.0296199	-0.331098	0.578984	0.175928	0.782785	-0.00493573	0.993429
AAES_168488.TSS +36368	Intergenic	-1.64382	0.0296526	-0.810864	0.227547	-0.335124	0.635765	-1.14541	0.0948303
ROBO4.TSS +214088	-intron (ROBO4, intron 4 of 19)	-1.32927	0.0296602	-1.35584	0.0169232	-1.41138	0.0234523	-0.58449	0.300107
ILF3.TSS -439346	Intergenic	-1.02049	0.0296718	-0.252827	0.549955	-1.05829	0.0261933	-0.227878	0.593444
MSRB3.TSS +463612	Intergenic	1.09767	0.0296865	0.544815	0.259799	1.19587	0.0184241	0.513673	0.294671
CRIP3.TSS +362334		-0.788803	0.029694	-1.70878	8.02e-07	-1.28705	0.000710562	-1.1722	0.000681285
ZNF438.TSS +879301	Intergenic	1.27295	0.0297315	1.02578	0.0691851	0.852328	0.156953	1.19928	0.0344865
IGLON5.TSS +262009	-intron (IGLON5, intron 2 of 22)	1.30475	0.0297632	1.05271	0.0631271	1.64885	0.00542394	1.10118	0.0545199
RSPH14.TSS +12790	-intron (RSPH14|AMEX60DD103000459.5, intron 3 of 5)	0.779731	0.0297806	0.803862	0.0193666	0.971088	0.00700852	0.886094	0.0103882
RTN4RL1.TSS +121046	-intron (RTN4RL1|AMEX60DD201054917.1, intron 1 of 1)	-1.34278	0.0297827	-0.0986354	0.858881	0.748386	0.188273	-0.0655825	0.906512
STAG3.TSS +746853	-intron (STAG3, intron 26 of 74)	-0.907429	0.0297896	-0.698522	0.0827138	-0.68714	0.101032	-0.415757	0.302711
PACSIN1.TSS -73086	Intergenic	1.37287	0.0298387	0.931124	0.129589	-0.0582116	0.93199	0.556082	0.372512
PRDM10.TSS -186543	Intergenic	1.48527	0.0298568	-0.131424	0.84708	-0.465836	0.529417	-0.707847	0.310657
TRMT9B.TSS +262005	Intergenic	-1.12838	0.0298671	-1.56957	0.000910033	-0.826059	0.105325	-1.24264	0.00904089
KCNIP3.TSS +387	-exon (KCNIP3|AMEX60DD102001201.3, exon 1 of 8)	-1.46639	0.029878	-0.753852	0.206316	-1.38007	0.0415016	-1.21777	0.047218
CORO2B.TSS +21385	-intron (CORO2B|AMEX60DD201004229.2, intron 1 of 11)	1.52463	0.0298876	-0.101388	0.884665	-0.336652	0.663018	0.382635	0.583979
COX2.TSS -681704		0.987986	0.029903	0.23503	0.59382	0.716298	0.123915	0.837028	0.0568569
CFAP61.TSS -10268	-intron (CFAP61|AMEX60DD103035490.6, intron 3 of 9)	-1.14967	0.0299053	-0.356161	0.473506	-0.0539378	0.916436	-0.156895	0.752949
EFCAB5.TSS +84884	-intron (EFCAB5|AMEX60DD201054804.1, intron 15 of 20)	1.55751	0.0299135	0.852154	0.221665	2.02755	0.00446729	0.684824	0.332945
N307_01407.TSS -806682		-1.11727	0.0299437	-1.08224	0.0213029	-1.38676	0.00898431	-0.901859	0.0572365
XELAEV_18043611MG.TSS -359722	Intergenic	-1.05427	0.0299493	-0.982617	0.0259851	-0.822763	0.0884536	-1.52314	0.000915488
FSTL4.TSS +409766	-intron (FSTL4|AMEX60DD102028911.2, intron 6 of 14)	1.53197	0.0299613	0.73376	0.286055	1.87444	0.00780597	0.528179	0.44967
SYTL4.TSS -399069	Intergenic	-1.04058	0.029964	-1.42389	0.0021421	-0.956032	0.0479498	-1.03432	0.0259785
OCM4.1.S.TSS -13953		-1.41957	0.0299802	-0.129883	0.800626	0.293516	0.596041	-0.553595	0.299923
LIPC.TSS +862399	Intergenic	2.00022	0.0299973	-1.04464	0.263479	0.91383	0.329734	-1.16922	0.216152
PLEC.TSS +2798		-1.31489	0.0300804	-1.14722	0.0299836	0.136169	0.803683	-0.978152	0.0676796
SRSF12.TSS +129111	Intergenic	-1.39241	0.0301207	-0.727922	0.184922	-1.4132	0.0278997	-1.17919	0.0386155
ANKRD1.TSS -3370	Intergenic	1.30028	0.0301226	-0.18528	0.754972	-0.0555651	0.931715	-0.418076	0.49229
FAM210A.TSS +188112	-intron (HSD17B3|AMEX60DD301043044.1, intron 4 of 11)	1.36437	0.0301269	1.79367	0.0027196	1.0342	0.108658	0.691885	0.260929
REEP1.TSS -151653		1.28888	0.0301292	0.615763	0.282443	-0.675125	0.320043	0.480069	0.409938
AGBL1.TSS +1288725	-intron (AGBL1|AMEX60DD301004208.1, intron 15 of 20)	1.45416	0.0301411	-0.606512	0.370128	-0.19942	0.785795	0.167955	0.80199
MEF2C.TSS +216211	-intron (MEF2C|AMEX60DD201042540.10, intron 5 of 9)	0.873974	0.0301416	0.198938	0.608672	-0.27682	0.524232	0.232071	0.554924
BTBD6.TSS -646672	Intergenic	-0.852991	0.0301438	-0.0408762	0.906411	0.24484	0.508523	-0.36489	0.304279
STAU1.TSS +61400	Intergenic	0.674782	0.030146	1.21602	5.4e-05	0.977155	0.00170564	1.04484	0.000556136
SST.TSS +549431	Intergenic	1.13688	0.0301632	0.612819	0.219903	0.966735	0.0695434	0.686952	0.17393
GNAO1.TSS -191775	Intergenic	0.855414	0.0301892	-0.206925	0.592088	0.324451	0.42683	-0.308663	0.431494
GP1BB.TSS +545154	Intergenic	1.13451	0.0301937	0.66482	0.186589	0.602438	0.266715	0.378808	0.460061
ATP8B3.TSS -65832	Intergenic	-0.832534	0.0302066	-0.917516	0.0133002	-0.874831	0.0245434	-0.704263	0.0582844
DFFA.TSS -462662	-intron (DR999_PMT02760, intron 3 of 16)	-1.14517	0.0302934	-0.231263	0.627328	0.00106811	0.998304	-0.367525	0.445765
NELL1.TSS -1035025	Intergenic	1.38967	0.0302961	-0.519977	0.418898	-0.108967	0.874219	-0.497001	0.445876
FBN1.TSS +467076	-intron (FBN1|AMEX60DD301003755.3, intron 47 of 59)	-1.38878	0.0303129	-1.74942	0.00333798	-0.843234	0.179375	-1.60831	0.00767694
LMAN1L.TSS +182985	-intron (LMAN1L, intron 4 of 25)	-1.67381	0.030314	-0.0938016	0.88755	-0.798619	0.275164	-0.727132	0.284355
DR999_PMT18611.TSS -77417		0.939118	0.030341	0.00451835	0.99148	0.157222	0.729335	0.253933	0.550518
FLRT3.TSS -487681	Intergenic	1.15737	0.0303426	-0.145591	0.78406	0.32507	0.552244	-0.227155	0.67106
ANTXR2.TSS +11437	-intron (ANTXR2|AMEX60DD301024951.1, intron 1 of 16)	-1.62847	0.0303765	-0.0869121	0.883358	-0.622952	0.355238	-0.191969	0.750343
LLAP_5831.TSS -98528		-1.00228	0.0303873	-0.809295	0.0567991	-0.0642194	0.885268	-0.671297	0.117265
ZNF385B.TSS +244663	-intron (ZNF385B, intron 18 of 58)	1.47618	0.0304657	0.366725	0.584707	0.474009	0.508707	0.0421646	0.950862
SLC5A7.TSS +910002	Intergenic	1.18964	0.0304698	0.320042	0.547327	0.722064	0.203566	0.224436	0.678517
UY3_12103.TSS -128420	Intergenic	-0.9617	0.0304802	0.150165	0.703384	-0.245206	0.567574	-0.0734802	0.854215
N/A.TSS -1005	Intergenic	-0.985604	0.0305021	-0.753421	0.0772292	-0.654747	0.149236	-0.659844	0.124497
RPL12.TSS -207373	Intergenic	1.75687	0.0305157	1.87532	0.0155207	1.76791	0.0307074	1.0544	0.184755
SAMD5.TSS -1090	Intergenic	-1.95225	0.03055	-0.631397	0.426658	-0.660738	0.434115	-0.785737	0.328027
ZNF827.TSS -127472	Intergenic	-1.18965	0.0305641	-1.05764	0.0377137	-0.981029	0.0747603	-1.05526	0.0405128
TJP1.TSS -172026	Intergenic	1.13326	0.0305762	0.102631	0.839153	1.11661	0.0335342	0.706472	0.159225
ROBO2.TSS +745867	Intergenic	-1.15491	0.0305975	-0.878687	0.0783106	-0.649475	0.218575	-0.728135	0.147054
PPDPF.TSS +657454	Intergenic	-0.942658	0.0306197	-0.32446	0.438736	-0.326413	0.45044	-0.552081	0.190425
FIBCD1.TSS -362371	Intergenic	-1.05047	0.0306209	-0.32733	0.480685	0.05951	0.900393	-0.327178	0.482743
ST18.TSS +134332	-intron (ST18|AMEX60DD201039692.1, intron 1 of 21)	-1.0809	0.0306472	-1.30982	0.00650976	-0.838038	0.0945982	-0.756347	0.115836
MCTP2.TSS -267276	Intergenic	1.3086	0.0306602	0.316281	0.59713	0.499885	0.422503	0.0909089	0.880413
PRDM9.TSS -22788		1.48347	0.0306668	-0.87997	0.205401	-0.99188	0.196866	-1.35413	0.0593543
SLC4A3.TSS +191985	-intron (SLC4A3|AMEX60DD201056428.1, intron 6 of 22)	-1.48152	0.0307003	-0.713479	0.248898	-0.542805	0.409169	-1.01913	0.105551
GFRA1.TSS +203652	-intron (GFRA1|AMEX60DD201053205.1, intron 3 of 8)	-1.33799	0.030709	-0.417287	0.435052	-0.0442349	0.938176	-0.101282	0.850317
HDAC9.TSS +270870	-intron (HDAC9|AMEX60DD201022301.1, intron 5 of 11)	1.15104	0.0307215	-0.183535	0.726766	0.103371	0.85497	-0.309558	0.562995
ARSA.TSS +363852	Intergenic	0.844821	0.0307385	-0.44681	0.242476	-0.231642	0.582698	-0.749795	0.059168
MYRF.TSS +21871	-intron (MYRF|AMEX60DD301004598.1, intron 2 of 17)	0.571679	0.0307453	0.624829	0.0147162	0.233912	0.387274	0.744499	0.00378807
FAM189A1.TSS +13993	-intron (FAM189A1|AMEX60DD201003628.1, intron 1 of 4)	1.47221	0.0307722	0.670144	0.315121	1.03961	0.136664	0.346923	0.608792
CALB1.TSS -287427	Intergenic	-1.04124	0.0307807	-1.21105	0.00779937	-0.658774	0.169359	-1.42396	0.00212076
ESM1.TSS +4499	-intron (ESM1|AMEX60DD102042092.1, intron 2 of 2)	-0.933352	0.0308008	-0.131437	0.721523	-0.157515	0.698148	-0.185227	0.621526
CLCF1.TSS -251502	Intergenic	0.661561	0.0308085	0.680043	0.0219226	0.380536	0.223272	0.669304	0.0248833
DIPK1B.TSS -63239	Intergenic	1.39979	0.0308857	0.547457	0.383705	0.61143	0.368826	1.25213	0.0450966
RPE.TSS +30309	-intron (FBXL16|AMEX60DD201020436.1, intron 1 of 7)	1.02246	0.0309453	0.747793	0.10421	0.685074	0.15718	0.810151	0.0800219
CNTN4.TSS +29159	-intron (CNTN4|AMEX60DD201023598.1, intron 1 of 21)	-0.834087	0.0309979	-0.423063	0.227262	-0.236723	0.529766	-0.458469	0.196669
EBF4.TSS +59688		-1.07951	0.0310024	-1.10203	0.0149527	-0.410305	0.395308	-1.09772	0.0172559
TBCEL.TSS +126057	-intron (TBCEL|AMEX60DD201053801.2, intron 1 of 10)	-0.736541	0.0310317	-0.448139	0.155783	-0.799559	0.0213153	-0.302247	0.341861
[truncated: 1,039 more rows]

## Sheet: S4.2 Core Enriched
Supplemental Data Table 4.2: Core Enriched vs Wound from H3K27me3 Cut-and-Run data (Supplemental Fig 5)
gene_names	Annot	ALM_log	ALM_p	SU_log	SU_p	LDN_log	LDN_p	DU_log	DU_p	min p
GSKIP.TSS +135645	Intergenic	3.97403	4.94e-05	2.10036	0.0321722	3.71184	0.000170592	2.77432	0.00453281	4.94e-05
MYCN.TSS -483	-promoter-TSS (MYCN|AMEX60DD102033177.2)	-1.38134	8.28e-05	-0.61682	0.0329665	-0.587029	0.0690932	-0.846711	0.00455845	8.28e-05
FCER1G.TSS +113771		3.00706	0.000279868	1.82989	0.0252159	1.95934	0.0225552	2.38177	0.00352774	0.000279868
ROBO2.TSS +315311	-exon (ROBO2, exon 16 of 55)	-2.74559	0.000298774	-1.5147	0.0162064	-0.875129	0.188294	-1.5111	0.0179533	0.000298774
PRDM13.TSS +766351	Intergenic	1.6286	0.000594931	0.429316	0.356333	0.501633	0.320792	0.770833	0.0987897	0.000594931
TENM4.TSS -473005	-intron (TENM4|AMEX60DD201049694.1, intron 5 of 33)	-1.91063	0.000648947	-1.37049	0.00261257	-0.250556	0.600083	-1.6475	0.000534156	0.000534156
SMARCA2.TSS -423932	Intergenic	2.56782	0.00076494	1.81369	0.0152743	1.65977	0.0362685	1.31287	0.084724	0.00076494
LHX3.TSS +10545	-intron (LHX3|AMEX60DD201050656.1, intron 1 of 5)	1.61329	0.00177145	0.514354	0.309933	0.293562	0.596055	0.340157	0.509027	0.00177145
TLX3.TSS -45454	Intergenic	-1.0062	0.00206762	-0.898316	0.00329897	-1.02085	0.00206768	-0.55522	0.0701211	0.00206762
PRICKLE1.TSS +1864	-intron (PRICKLE1|AMEX60DD201006371.1, intron 1 of 7)	-1.36956	0.00221861	-0.116275	0.771118	0.431224	0.29763	-0.870115	0.0336484	0.00221861
CHRD.TSS +34413	-intron (CHRD|AMEX60DD201001527.1, intron 22 of 22)	1.45496	0.00238619	-0.118445	0.803234	0.254766	0.620194	0.104852	0.826872	0.00238619
NR4A2.TSS +27806	Intergenic	1.33908	0.00245566	-0.0636534	0.883839	0.376607	0.421976	0.0798362	0.856283	0.00245566
GLRA1.TSS -104353	Intergenic	1.93318	0.00260217	-0.0910127	0.887662	0.590137	0.378899	0.569103	0.375649	0.00260217
PHLDB1.TSS -31270	-intron (PHLDB1|AMEX60DD201053877.14, intron 1 of 21)	2.60227	0.00261008	1.55968	0.0677418	1.77278	0.0467559	1.39684	0.105278	0.00261008
SMARCA5.TSS -74094	Intergenic	2.4417	0.00279261	0.13577	0.869404	2.36315	0.00411832	0.0697081	0.933779	0.00279261
TBX2.TSS +313216	Intergenic	1.69278	0.00285859	-0.373772	0.513545	0.0227745	0.970553	-0.276172	0.633616	0.00285859
MTOR.TSS +99141	-intron (MTOR|AMEX60DD301051133.1, intron 1 of 56)	1.02342	0.00298576	1.17918	0.000458216	0.799168	0.022218	0.914779	0.00688432	0.000458216
CCR7.TSS -54811	Intergenic	2.33679	0.00304148	2.62406	0.000499548	2.10687	0.00810402	2.44322	0.00131321	0.000499548
DBX1.TSS -7600	Intergenic	2.54798	0.00311746	1.13953	0.183724	0.992293	0.273945	0.617209	0.478954	0.00311746
EMX2.TSS +222434	Intergenic	-1.44574	0.00323553	-1.068	0.0211544	-0.932666	0.0552151	-1.11487	0.0169822	0.00323553
PHLDB1.TSS -12440	-intron (PHLDB1|AMEX60DD201053877.14, intron 4 of 21)	-1.89538	0.00363509	-0.562167	0.270027	-0.143167	0.794763	-1.06379	0.0453254	0.00363509
ARF6.TSS -93571	Intergenic	-1.75317	0.00498271	-2.10971	0.000226313	-1.56186	0.0120491	-1.47068	0.00962501	0.000226313
ROBO2.TSS -266932	Intergenic	1.85979	0.00506551	1.57322	0.0130386	2.1182	0.0013017	1.19534	0.0647401	0.0013017
ENG.TSS +46878	-intron (ENG|AMEX60DD201050237.1, intron 1 of 14)	1.61846	0.00514141	1.08486	0.0535321	1.20648	0.0419689	1.29463	0.0218078	0.00514141
GATA5.TSS -598838	Intergenic	-1.11563	0.00529096	-0.408668	0.273425	-0.549943	0.16359	-0.504595	0.179864	0.00529096
TBX6.TSS -45705	Intergenic	1.20937	0.00543266	0.523214	0.213457	1.08129	0.0144114	0.422071	0.322637	0.00543266
ITGA2.TSS +326	-intron (ITGA2, intron 1 of 29)	-2.03093	0.0056655	-3.09647	1.22e-05	-0.649822	0.352702	-2.62838	0.000204005	1.22e-05
SLC12A2.TSS -137	-promoter-TSS (SLC12A2|AMEX60DD201014608.1)	-0.849887	0.00571289	-0.316071	0.275777	-0.404399	0.185625	-0.410714	0.159998	0.00571289
NFASC.TSS +107359	-intron (NFASC|AMEX60DD201009064.1, intron 2 of 25)	0.952834	0.00657351	1.21783	0.000333564	1.12593	0.00138521	0.781857	0.0225092	0.000333564
TAGLN3.TSS +3539	-intron (TAGLN3, intron 1 of 4)	1.78402	0.0071201	0.155213	0.813999	0.838822	0.227863	0.302477	0.649769	0.0071201
SMAD6.TSS +1936	-intron (DV515_00006510, intron 1 of 2)	-0.807835	0.00729974	0.162169	0.565863	0.28322	0.332965	-0.0302869	0.91523	0.00729974
CNTN2.TSS +43568	-intron (CNTN2|AMEX60DD201009063.1, intron 4 of 22)	1.82743	0.00739252	0.955226	0.153329	1.41696	0.0423006	0.512828	0.452023	0.00739252
PFAS.TSS -149097	-intron (LOC115074096, intron 60 of 106)	2.05031	0.00750762	1.05038	0.164345	0.77706	0.337647	1.25138	0.0990771	0.00750762
BMP5.TSS +399666	-intron (BMP5|AMEX60DD201033480.1, intron 2 of 6)	1.1914	0.00773375	0.179369	0.682007	0.621681	0.1792	0.402131	0.361102	0.00773375
BARX1.TSS +3098	-intron (BARX1|AMEX60DD102023676.2, intron 1 of 2)	-1.6517	0.00842259	-0.610446	0.285115	0.946204	0.100686	-0.769343	0.182239	0.00842259
NKX2-5.TSS +140858	Intergenic	1.70431	0.00843309	0.428732	0.503023	0.41975	0.539581	-0.121918	0.85249	0.00843309
SLIT3.TSS -258935	Intergenic	1.70545	0.00849509	0.514531	0.417602	1.39567	0.0349033	0.343518	0.596629	0.00849509
KLHL13.TSS -583727	Intergenic	-1.11545	0.00879431	-0.883418	0.015689	-0.978683	0.0188968	-0.522873	0.154245	0.00879431
EMX2.TSS +8458	-intron (EMX2|AMEX60DD201053236.1, intron 2 of 2)	-1.74981	0.00913489	-0.98985	0.087306	0.884256	0.129434	-1.23365	0.0374656	0.00913489
ZBTB16.TSS -202189	Intergenic	0.957676	0.00940722	-0.0745535	0.836451	-0.181985	0.643647	0.363181	0.315014	0.00940722
MARCHF4.TSS -152322	Intergenic	1.34315	0.00965558	-0.320587	0.535262	-0.901956	0.12595	-0.258708	0.621013	0.00965558
GSTENG00024593001.TSS -2951	Intergenic	1.21715	0.0098492	0.207564	0.649019	0.421668	0.394894	0.110887	0.812113	0.0098492
NINJ1.TSS +1233	-intron (NINJ1|AMEX60DD201023688.2, intron 1 of 4)	-1.47515	0.0101443	-0.725823	0.181426	-0.782548	0.166697	-1.04859	0.055762	0.0101443
HHIPL2.TSS +935	-intron (HHIPL2|AMEX60DD102036165.2, intron 1 of 7)	-1.03932	0.0107436	-0.206145	0.595279	-0.385491	0.338813	-0.461875	0.237173	0.0107436
ATOH1.TSS +346724	Intergenic	1.09346	0.0109129	0.68347	0.0923399	0.485729	0.27665	1.19848	0.00310795	0.00310795
NOS1.TSS -598517	Intergenic	-1.12442	0.0109832	-0.952527	0.0213311	-0.136038	0.750853	-0.801901	0.0541754	0.0109832
GLI1.TSS +41078	-intron (GLI1|AMEX60DD201029758.1, intron 1 of 11)	-1.24418	0.0115648	-1.10764	0.0109068	-0.8498	0.0763291	-0.994387	0.0242726	0.0109068
GLI2.TSS -100650	-intron (GLI2|AMEX60DD201056125.3, intron 2 of 13)	-1.53569	0.0122311	-1.27964	0.0183522	-0.80113	0.171198	-1.13938	0.0379522	0.0122311
MARCHF11.TSS +170	-promoter-TSS (MARCHF11|AMEX60DD102038904.2)	1.9246	0.0130643	0.84692	0.26778	1.5781	0.0458075	0.634236	0.41294	0.0130643
CHRDL2.TSS +48277	-intron (CHRDL2|AMEX60DD201049819.2, intron 1 of 8)	-1.4032	0.0131896	-0.420755	0.371	-0.85277	0.111593	-1.05093	0.0327424	0.0131896
FGF8.TSS -943158	Intergenic	-1.28508	0.0134464	-1.09488	0.0219144	-0.557999	0.269416	-0.794827	0.0975983	0.0134464
PTF1A.TSS -139483	Intergenic	-1.46524	0.0135045	-0.992313	0.0596244	-1.20813	0.0396873	-0.634147	0.230169	0.0135045
PHLDB1.TSS -24926	-intron (PHLDB1|AMEX60DD201053877.14, intron 2 of 21)	1.21243	0.0137191	1.11419	0.0190656	1.3358	0.00694427	0.829036	0.0845486	0.00694427
RPS19BP1.TSS -118682	Intergenic	-1.11057	0.0139434	-0.388581	0.297582	-0.0204435	0.959834	-0.565631	0.140797	0.0139434
NOX1.TSS -7580	Intergenic	-1.53903	0.0143427	-0.781121	0.176869	-1.69411	0.00847741	-1.06071	0.0703818	0.00847741
PTPRU.TSS +11060	-intron (PTPRU|AMEX60DD201005483.1, intron 1 of 29)	1.37998	0.0150391	0.656679	0.233368	1.03556	0.0749592	0.276099	0.623921	0.0150391
PHLDB1.TSS -2874	-intron (PHLDB1|AMEX60DD201053877.14, intron 2 of 21)	1.20626	0.0155857	1.51247	0.00141008	1.56572	0.0016224	1.27037	0.00799476	0.00141008
TIE1.TSS +154642		0.995587	0.0158553	0.732333	0.063608	0.24288	0.575299	0.766561	0.0543154	0.0158553
PRDM9.TSS +24622		0.981393	0.0171485	-0.158829	0.692069	0.208248	0.63117	0.0723936	0.857881	0.0171485
SOX9.TSS -1673218		1.18905	0.0172292	1.19462	0.0134509	1.26027	0.0122151	0.752599	0.123946	0.0122151
RELN.TSS -472351	-intron (RELN|AMEX60DD301006405.2, intron 6 of 15)	-1.27474	0.0174236	-0.552789	0.2543	0.116113	0.818043	-0.438659	0.369151	0.0174236
TIE1.TSS +2857		-1.45929	0.0181192	-0.80743	0.154167	-0.688731	0.251569	-0.0686587	0.903219	0.0181192
PTPRF.TSS +108547		0.892267	0.0183108	0.128218	0.727843	-0.0016379	0.996716	0.0508599	0.8915	0.0183108
ACVRL1.TSS +1784	-intron (ACVRL1|AMEX60DD201030013.1, intron 1 of 9)	0.913439	0.018394	1.35935	0.000305433	1.59346	3.44e-05	1.36417	0.000304205	3.44e-05
PIK3CD.TSS -447644	Intergenic	0.653546	0.0188855	1.10128	4.72e-05	0.952611	0.000629103	1.02641	0.00015795	4.72e-05
CIT.TSS -392	-promoter-TSS (CIT|AMEX60DD201000535.11)	1.1676	0.0192757	0.750907	0.122998	0.538571	0.295395	0.346003	0.483046	0.0192757
GATA3.TSS +3103	-intron (GATA3|AMEX60DD201008149.3, intron 2 of 5)	1.3593	0.0196557	-0.659578	0.258801	0.938529	0.111293	-0.305982	0.60107	0.0196557
SYK.TSS -49	-promoter-TSS (SYK|AMEX60DD201042964.2)	1.97084	0.0196591	0.64642	0.439948	0.206482	0.821151	1.25569	0.132807	0.0196591
CHRDL1.TSS +1196	-intron (CHRDL1|AMEX60DD201037123.1, intron 1 of 9)	-0.779059	0.0198189	0.167363	0.604021	0.0855602	0.795684	0.176034	0.58641	0.0198189
NOP9.TSS -279044	-intron (KHDC4|AMEX60DD301014832.1, intron 13 of 13)	1.3101	0.0203025	-0.327367	0.560099	1.09851	0.0558867	0.0798844	0.887121	0.0203025
AUTS2.TSS -1359	Intergenic	-1.14843	0.0208512	-0.23229	0.618293	-0.389514	0.424686	-0.071186	0.879038	0.0208512
MARCHF9.S.TSS +416188	-intron (MARCHF9.S, intron 1 of 4)	1.90174	0.0216615	-0.497247	0.550928	1.09103	0.195032	-0.979448	0.24888	0.0216615
ITGA3.TSS -39042	Intergenic	-1.34181	0.0219199	-0.455076	0.383902	-0.340239	0.541668	0.132224	0.799939	0.0219199
DRAXIN.TSS +7845	-intron (DRAXIN|AMEX60DD101051109.2, intron 1 of 7)	0.721793	0.0222584	0.804845	0.00740342	0.616166	0.0548362	0.724849	0.0168794	0.00740342
NEDD1.TSS +132641	-intron (NEDD1|AMEX60DD201007829.1, intron 1 of 11)	-0.847073	0.02241	-0.763914	0.0265321	-0.890664	0.0181076	-0.853852	0.0145574	0.0145574
ROBO2.TSS +340222	-intron (ROBO2, intron 16 of 54)	-1.64881	0.0224804	-0.208658	0.730902	-0.240684	0.713279	-0.129936	0.831879	0.0224804
FGF4.TSS +161892	-exon (FGF4, exon 6 of 6)	-1.55595	0.022607	-1.14638	0.0687269	-1.09251	0.105129	-0.938083	0.138452	0.022607
SOX11.TSS +695	-exon (SOX11|AMEX60DD201033320.1, exon 1 of 1)	-0.652254	0.0227589	-0.400884	0.149976	-0.147878	0.604315	-0.601198	0.0318178	0.0227589
PTPRF.TSS -157839		-1.09946	0.0227902	-1.12041	0.0136548	-0.596605	0.211486	-0.826319	0.0700114	0.0136548
AP4M1.TSS +1028988	-intron (STAG3, intron 48 of 74)	-1.11333	0.0228796	-0.685174	0.137994	-0.61838	0.202493	-0.465119	0.315693	0.0228796
NLGN2.TSS +116550	-intron (NLGN2|AMEX60DD201012742.1, intron 1 of 6)	-1.36393	0.0239505	-0.694389	0.218506	-0.0337263	0.953689	-0.857473	0.132271	0.0239505
TPRG1.TSS +18925	-intron (TPRG1|AMEX60DD201003184.1, intron 1 of 6)	0.887915	0.0242061	0.617408	0.102218	0.415966	0.307113	0.402402	0.293744	0.0242061
CHRDL1.TSS +815791	Intergenic	-1.22104	0.0245094	-1.16611	0.0225564	-0.836235	0.121504	-1.02097	0.0472851	0.0225564
COL2A1.TSS -660570	Intergenic	-1.46313	0.0248079	-0.698709	0.217535	0.0159984	0.978587	-0.612665	0.284853	0.0248079
GDF10.TSS -273346	Intergenic	-0.846315	0.0248224	-0.0330521	0.92555	-0.0499225	0.892553	-0.408902	0.252988	0.0248224
CBLN1.TSS +29125		-0.947445	0.0249676	-1.07614	0.00512319	-0.802366	0.0571197	-0.50916	0.183746	0.00512319
COL1A1.TSS -747367	Intergenic	0.966026	0.0251663	0.634271	0.131756	0.712619	0.104463	0.297399	0.484595	0.0251663
ERCC6L.TSS +611		-0.971779	0.025357	-0.623449	0.129164	-0.824763	0.0593193	-0.775795	0.0615306	0.025357
GLI1.TSS +4260	-intron (GLI1|AMEX60DD201029758.1, intron 1 of 11)	-1.45896	0.0257419	-0.290023	0.621374	0.535063	0.375133	-0.610111	0.30553	0.0257419
NFASC.TSS -187501	Intergenic	1.08529	0.0267688	0.821592	0.083157	0.902503	0.0701841	0.862267	0.0708208	0.0267688
HEY2.TSS +669588	Intergenic	1.01831	0.0267869	0.656437	0.137595	1.03769	0.0254616	0.68401	0.125158	0.0254616
SEMA3A.TSS -65402	Intergenic	-1.43501	0.0268786	-1.04909	0.0802267	-1.67247	0.0122063	-0.614192	0.306205	0.0122063
NEUROD2.TSS -204727	Intergenic	0.836578	0.026929	0.121859	0.741558	0.613031	0.111091	0.155202	0.676809	0.026929
AMIGO1.TSS -253828	Intergenic	1.00865	0.0271102	0.338959	0.452415	0.476149	0.304947	0.289093	0.523488	0.0271102
CBLN1.TSS -30469		1.67412	0.0271203	0.135239	0.857325	1.14982	0.140152	0.565807	0.452389	0.0271203
CHRDL1.TSS +13729	-intron (CHRDL1|AMEX60DD201037123.1, intron 1 of 9)	1.32843	0.0273029	-0.62122	0.304783	-0.112291	0.863423	-0.236796	0.696409	0.0273029
HOXC11.TSS -116351	Intergenic	-1.16458	0.0284887	-0.655427	0.160081	-0.677754	0.188519	-0.786333	0.0987116	0.0284887
FURIN.TSS -30527	Intergenic	0.959584	0.0287784	1.46872	0.000329555	1.68817	8.23e-05	1.38143	0.000822661	8.23e-05
ROBO2.TSS +745867	Intergenic	-1.15491	0.0305975	-0.878687	0.0783106	-0.649475	0.218575	-0.728135	0.147054	0.0305975
PRDM9.TSS -22788		1.48347	0.0306668	-0.87997	0.205401	-0.99188	0.196866	-1.35413	0.0593543	0.0306668
SMARCD1.TSS -233380	Intergenic	0.68483	0.0311629	0.628723	0.0417503	0.711471	0.0264377	0.518004	0.0956052	0.0264377
TBX6.TSS +3782	-intron (TBX6|AMEX60DD201028372.1, intron 1 of 7)	1.6928	0.031296	-0.288626	0.714309	0.535526	0.512041	-0.426019	0.594044	0.031296
ENPEP.TSS +285	-exon (ENPEP|AMEX60DD301044299.1, exon 1 of 20)	0.728113	0.0316576	0.547536	0.0925919	0.33339	0.339084	0.558224	0.0889085	0.0316576
GLI2.TSS +208464	-intron (GLI2|AMEX60DD201056125.3, intron 2 of 13)	1.30155	0.0317696	-0.0698259	0.907104	0.608024	0.335076	0.156372	0.795218	0.0317696
SKI.TSS -144954	Intergenic	1.46373	0.032193	1.12794	0.0874736	2.0168	0.00292218	1.14904	0.0840958	0.00292218
ACSBG1.TSS +3919	-intron (ACSBG1|AMEX60DD102004065.4, intron 3 of 14)	-0.845596	0.032203	-1.33894	0.000326385	-0.567178	0.14972	-1.39267	0.000242864	0.000242864
EMX2.TSS -367277	Intergenic	1.04752	0.0324363	0.227528	0.633887	0.0681289	0.895209	-0.257877	0.598171	0.0324363
HAS2.TSS +43452	-intron (HAS2|AMEX60DD301040413.1, intron 2 of 3)	-1.5229	0.0324841	-0.594158	0.330947	-0.295053	0.652937	-0.720229	0.246895	0.0324841
TENM4.TSS +14291	-intron (TENM4|AMEX60DD201049694.1, intron 1 of 33)	-0.881987	0.0327448	-0.489768	0.205827	-0.311907	0.444121	-0.320631	0.40988	0.0327448
DKK1.TSS +10379	Intergenic	1.09178	0.0328952	-0.248009	0.623562	-0.362549	0.513199	-0.217379	0.670793	0.0328952
CFAP43.TSS -9780	-intron (CFAP43|AMEX60DD201053030.1, intron 2 of 29)	0.780383	0.0330534	0.893459	0.00928672	0.162342	0.671566	0.526968	0.132548	0.00928672
ITGA2B.TSS +95033	-intron (ITGA2B|AMEX60DD201009884.2, intron 15 of 17)	2.01551	0.0341037	2.42097	0.00797348	1.75865	0.0692795	2.17948	0.0178202	0.00797348
GHRH.TSS -23653	Intergenic	0.844103	0.0344734	0.240514	0.529801	0.230216	0.580791	0.214783	0.580062	0.0344734
DLG2.TSS -126597	Intergenic	-1.22991	0.0349434	-1.56061	0.00432482	-0.714714	0.213378	-1.10183	0.0440347	0.00432482
PRDM13.TSS -268495	Intergenic	1.4761	0.0350329	1.58961	0.0156759	0.426482	0.566123	1.96429	0.0028702	0.0028702
LHX3.TSS +272816	Intergenic	-1.14082	0.0351586	-1.05732	0.0249292	-1.36738	0.0129115	-1.17647	0.0154881	0.0129115
ZBTB16.TSS +125584	-intron (ZBTB16|AMEX60DD201053674.1, intron 2 of 6)	1.50308	0.0361128	0.309194	0.661062	0.425115	0.576074	0.386249	0.587726	0.0361128
TBX22.TSS +12912	-intron (TBX22|AMEX60DD201037579.1, intron 4 of 7)	0.991619	0.0361298	-0.387455	0.405967	0.338572	0.492819	0.0385782	0.934128	0.0361298
EMX2.TSS -68681	Intergenic	1.25077	0.0362024	-0.235468	0.691404	0.930861	0.125476	-0.258915	0.665911	0.0362024
PCSK5.TSS -211557		0.96185	0.0366577	0.578293	0.196119	0.312975	0.511621	0.568362	0.207195	0.0366577
FGF4.TSS -140596	Intergenic	-1.59706	0.0373365	-1.00561	0.146853	-0.133346	0.85279	-0.600834	0.386814	0.0373365
ROBO2.TSS +465790	-intron (ROBO2, intron 53 of 54)	-1.39335	0.0375304	-0.82923	0.176058	-0.56185	0.386413	-0.700661	0.256228	0.0375304
RGCC.TSS -61649	Intergenic	1.20246	0.0377079	-0.39959	0.487376	0.543142	0.365193	0.643602	0.257086	0.0377079
MARCHF11.TSS +13621	-intron (MARCHF11|AMEX60DD102038904.2, intron 1 of 2)	1.37661	0.0377115	0.721696	0.259547	0.913567	0.181096	1.2737	0.0462452	0.0377115
INPP5J.TSS +1214	-intron (INPP5J|AMEX60DD201000913.1, intron 1 of 12)	-1.31625	0.0378704	-0.897536	0.120696	0.648629	0.269029	-0.868445	0.137342	0.0378704
ITPR1.TSS +464542	-intron (ITPR1|AMEX60DD201023582.2, intron 10 of 23)	1.32771	0.0382955	1.26604	0.035826	0.300962	0.658984	1.213	0.0470094	0.035826
CCR7.TSS +20228	-intron (CCR7|AMEX60DD301010137.1, intron 1 of 2)	1.3018	0.038583	1.36511	0.0240251	1.37558	0.0300388	0.834134	0.174707	0.0240251
ITGA3.TSS -83497	Intergenic	1.43045	0.038697	1.52247	0.020882	1.32943	0.0580232	1.31908	0.0478922	0.020882
MAGOH.TSS -397083		-1.00839	0.0390144	-1.12825	0.0101744	-0.258323	0.579118	-0.77045	0.0804686	0.0101744
INHBA.TSS -404	none	-0.832318	0.0390371	-0.216533	0.568521	-0.0468956	0.905649	-0.146636	0.700858	0.0390371
TGFB3.TSS -8861	-intron (IFT43|AMEX60DD301011163.1, intron 2 of 9)	-0.995718	0.0392523	-0.0594512	0.888032	-0.232455	0.614292	-0.0871335	0.838484	0.0392523
AXIN2.TSS -148430		0.794827	0.0400311	0.0683178	0.85795	-0.315986	0.432625	-0.116065	0.762805	0.0400311
RAB11FIP4.TSS +39143		-0.777395	0.040336	0.132774	0.714732	0.28097	0.45022	0.0983988	0.787249	0.040336
CHRD.TSS +5838	-intron (CHRD|AMEX60DD201001527.1, intron 2 of 22)	0.562017	0.040752	0.699549	0.00813753	0.609244	0.0279456	0.395106	0.139079	0.00813753
MARCHF9.S.TSS +126042	-intron (MARCHF9.S, intron 1 of 4)	0.816209	0.0410053	0.360567	0.352878	0.0569177	0.891282	0.289543	0.459705	0.0410053
EMX2.TSS -399016	Intergenic	1.90236	0.0422846	-0.776593	0.413288	1.28413	0.176986	0.269137	0.774738	0.0422846
MARCHF9.S.TSS +385131	-intron (MARCHF9.S, intron 1 of 4)	1.34237	0.0424471	0.0835674	0.898254	0.887282	0.190449	0.237023	0.718668	0.0424471
PHLDB1.TSS +177739	Intergenic	0.88814	0.0430923	0.539554	0.196324	0.367035	0.420872	0.782733	0.0622639	0.0430923
IHH.TSS -243633	Intergenic	-0.769148	0.0431262	-0.561329	0.115082	-0.253643	0.499661	-0.726829	0.0440897	0.0431262
ITGA3.TSS -175432	Intergenic	1.0146	0.0433184	1.29744	0.00625687	1.28257	0.0105367	0.960312	0.0460744	0.00625687
PAX6.TSS +24222	-intron (AMEX60DD301004906.1, intron 2 of 2)	-0.600685	0.0438153	-0.114536	0.688737	0.24429	0.405521	-0.0398565	0.889563	0.0438153
NANOS1.TSS +20209	Intergenic	0.987059	0.0441545	-0.314996	0.513732	-0.60021	0.268204	-0.0548527	0.910027	0.0441545
RANBP17.TSS -285444	-intron (LOC115656154, intron 4 of 7)	-1.09003	0.0445662	-1.35235	0.00786336	-0.504917	0.343422	-1.27236	0.0134428	0.00786336
RANBP17.TSS -285444	-intron (LOC115656154, intron 4 of 7)	-1.09003	0.0445662	-1.35235	0.00786336	-0.504917	0.343422	-1.27236	0.0134428	0.00786336
ENOX1.TSS -62339	Intergenic	1.16251	0.0450601	-0.273716	0.632588	0.684042	0.253727	0.392852	0.489642	0.0450601
GLI2.TSS +77884	-intron (GLI2|AMEX60DD201056125.4, intron 1 of 13)	1.3924	0.0451955	-0.650269	0.351455	0.471828	0.509685	-0.977827	0.169146	0.0451955
NEUROD2.TSS +223770	Intergenic	1.34928	0.0453742	1.73135	0.00683925	1.83888	0.0059344	1.48884	0.0213506	0.0059344
NHLH2.TSS +24432	-intron (NHLH2|AMEX60DD201046747.1, intron 1 of 1)	-0.630839	0.045803	-0.0298058	0.921332	0.169801	0.585429	-0.241109	0.427655	0.045803
TENM4.TSS -509943	-intron (TENM4|AMEX60DD201049694.1, intron 5 of 33)	1.02683	0.0460075	0.101832	0.839731	0.300259	0.575224	0.0256946	0.9598	0.0460075
DCDC1.TSS -169806	Intergenic	1.10221	0.0460348	-0.819873	0.140168	-0.784781	0.209118	-0.264953	0.632009	0.0460348
SIT1.TSS +60582	-intron (SIT1, intron 5 of 5)	1.03869	0.0470369	0.0956811	0.852605	-0.199258	0.718221	-0.0901076	0.862628	0.0470369
CCR7.TSS +17392	-intron (CCR7|AMEX60DD301010137.1, intron 1 of 2)	1.5003	0.0471628	0.858602	0.24154	0.912877	0.243513	1.40027	0.0558538	0.0471628
SOX19.TSS +5320	-intron (AMEX60DD103012772.4, intron 1 of 1)	-1.16269	0.0475187	-2.5591	8.98e-06	-0.42002	0.465369	-2.30638	7.29e-05	8.98e-06
RELN.TSS -79977	-intron (RELN|AMEX60DD301006405.1, intron 6 of 10)	1.44592	0.0483987	-0.837552	0.257326	0.0896733	0.907051	-0.603542	0.417142	0.0483987
ALDH1A2.TSS -124766	Intergenic	-1.18313	0.0484611	0.108417	0.821131	0.210501	0.687705	0.0671609	0.890521	0.0484611
GCLC.TSS -486682	Intergenic	-0.5721	0.0488163	-0.665911	0.0163855	-0.713933	0.0158666	-0.555458	0.0466642	0.0158666
SOX13.TSS +103160	Intergenic	-0.865233	0.0497878	0.211271	0.603278	0.207189	0.626308	0.0376104	0.926912	0.0497878
NEUROD2.TSS -430407	Intergenic	-0.9829	0.0499605	-0.482594	0.299366	-0.735869	0.142196	-0.42093	0.368901	0.0499605

## Sheet: S4.3 Search Terms
Supplemental Data Table 4.3: GO TERMS Used to Identify Pathway Specific Genes in ENSEMBL
Limb Patterning	Cell Cycle	Immune&Stress	Epigenetics	FGF Signaling	BMP Signaling	PDGF Signaling	VEGF Signaling	WNT Signaling	ERK/MAPK Signaling	NRG/ERBB Signaling	RA Signaling	RAS Signaling	SHH Signaling
GO:0035136 - forelimb morphogenesis	GO:0007049 - cell cycle	GO:0006955 - immune response	GO:0016570 - histone modification	GO:0044344 - cellular response to fibroblast growth factor stimulus	GO:0030509 - BMP signaling pathway	GO:0048407 - platelet-derived growth factor binding	GO:0038085 - vascular endothelial growth factor binding	GO:0016055 - Wnt signaling pathway	GO:0002167 - VRK3/VHR/ERK complex	GO:0038132 - neuregulin binding	GO:0042974 - nuclear retinoic acid receptor binding	GO:0007265 - Ras protein signal transduction	GO:0035301 - Hedgehog signaling complex
GO:0035115 - embryonic forelimb morphogenesis	GO:0000278 - mitotic cell cycle	GO:0006959 - humoral immune response	GO:0016571 - histone methylation	GO:0030353 - fibroblast growth factor receptor antagonist activity	GO:0071772 - response to BMP	GO:0036120 - cellular response to platelet-derived growth factor stimulus	GO:0005172 - vascular endothelial growth factor receptor binding	GO:0060070 - canonical Wnt signaling pathway	GO:0070375 - ERK5 cascade	GO:0038131 - neuregulin receptor activity	GO:0071300 - cellular response to retinoic acid	GO:0046578 - regulation of Ras protein signal transduction	GO:0008158 - hedgehog receptor activity
GO:0030326 - embryonic limb morphogenesis	GO:0022402 - cell cycle process	GO:0002250 - adaptive immune response	GO:0016573 - histone acetylation	GO:0040036 - regulation of fibroblast growth factor receptor signaling pathway	GO:0030510 - regulation of BMP signaling pathway	GO:0005019 - platelet-derived growth factor beta-receptor activity	GO:1900746 - regulation of vascular endothelial growth factor signaling pathway	GO:0035567 - non-canonical Wnt signaling pathway	GO:0070371 - ERK1 and ERK2 cascade	GO:0038127 - ERBB signaling pathway	GO:0048384 - retinoic acid receptor signaling pathway	GO:1904475 - regulation of small GTPase binding	GO:0097108 - hedgehog family protein binding
GO:0035108 - limb morphogenesis	GO:0022403 - cell cycle phase	GO:0002384 - hepatic immune response	GO:0016574 - histone ubiquitination	GO:0008543 - fibroblast growth factor receptor signaling pathway	GO:0071773 - cellular response to BMP stimulus	GO:0005018 - platelet-derived growth factor alpha-receptor activity	GO:0038084 - vascular endothelial growth factor signaling pathway	GO:0030111 - regulation of Wnt signaling pathway	GO:0070376 - regulation of ERK5 cascade	GO:1901184 - regulation of ERBB signaling pathway	GO:0044323 - retinoic acid-responsive element binding	GO:0046579 - positive regulation of Ras protein signal transduction	GO:1990787 - negative regulation of hh target transcription factor activity
GO:0060174 - limb bud formation	GO:0022403 - cell cycle phase	GO:0002385 - mucosal immune response	GO:0016575 - histone deacetylation	GO:0071774 - response to fibroblast growth factor	GO:0098821 - BMP receptor activity	GO:0048008 - platelet-derived growth factor receptor signaling pathway	GO:0038086 - VEGF-activated platelet-derived growth factor receptor signaling pathway	GO:0060828 - regulation of canonical Wnt signaling pathway	GO:0070377 - negative regulation of ERK5 cascade	GO:0005176 - ErbB-2 class receptor binding	GO:0048385 - regulation of retinoic acid receptor signaling pathway	GO:0046580 - negative regulation of Ras protein signal transduction	GO:0007225 - patched ligand maturation
GO:0009952 - anterior/posterior pattern specification	GO:0044770 - cell cycle phase transition	GO:0045087 - innate immune response	GO:0016577 - histone demethylation	GO:0001571 - non-tyrosine kinase fibroblast growth factor receptor activity	GO:0035582 - sequestering of BMP in extracellular matrix	GO:0036119 - response to platelet-derived growth factor	GO:0030947 - regulation of vascular endothelial growth factor receptor signaling pathway	GO:0030178 - negative regulation of Wnt signaling pathway	GO:0070378 - positive regulation of ERK5 cascade	GO:1901186 - positive regulation of ERBB signaling pathway	GO:1900052 - regulation of retinoic acid biosynthetic process	GO:0034996 - RasGAP-Fyn-Lyn-Yes complex	GO:0007228 - positive regulation of hh target transcription factor activity
GO:0009953 - dorsal/ventral pattern formation	GO:1903047 - mitotic cell cycle process	GO:0016064 - immunoglobulin mediated immune response	GO:0016578 - histone deubiquitination	GO:0005104 - fibroblast growth factor receptor binding	GO:0030514 - negative regulation of BMP signaling pathway	GO:0005161 - platelet-derived growth factor receptor binding	GO:0035924 - cellular response to vascular endothelial growth factor stimulus	GO:0030177 - positive regulation of Wnt signaling pathway	GO:0000165 - MAPK cascade	GO:1901185 - negative regulation of ERBB signaling pathway	GO:0048386 - positive regulation of retinoic acid receptor signaling pathway	GO:1904477 - positive regulation of small GTPase binding	GO:0007224 - smoothened signaling pathway
GO:0009954 - proximal/distal pattern formation	GO:0000075 - cell cycle checkpoint signaling	GO:0090720 - primary adaptive immune response	GO:0106077 - histone succinylation	GO:0005007 - fibroblast growth factor receptor activity	GO:0030513 - positive regulation of BMP signaling pathway	GO:0005017 - platelet-derived growth factor receptor activity	GO:1902547 - regulation of cellular response to vascular endothelial growth factor stimulus	GO:0090090 - negative regulation of canonical Wnt signaling pathway	GO:0070372 - regulation of ERK1 and ERK2 cascade	GO:0038128 - ERBB2 signaling pathway	GO:0048387 - negative regulation of retinoic acid receptor signaling pathway	GO:1904476 - negative regulation of small GTPase binding	GO:0008589 - regulation of smoothened signaling pathway
GO:0035107 - appendage morphogenesis	GO:0098763 - mitotic cell cycle phase	GO:0050776 - regulation of immune response	GO:0042393 - histone binding	GO:0017134 - fibroblast growth factor binding	GO:0036122 - BMP binding	GO:0035790 - platelet-derived growth factor receptor-alpha signaling pathway	GO:0038190 - VEGF-activated neuropilin signaling pathway	GO:0090263 - positive regulation of canonical Wnt signaling pathway	GO:0070373 - negative regulation of ERK1 and ERK2 cascade	GO:0043125 - ErbB-3 class receptor binding	GO:0001972 - retinoic acid binding	GO:0003925 - G protein activity	GO:0045879 - negative regulation of smoothened signaling pathway
GO:0060173 - limb development	GO:0051726 - regulation of cell cycle	GO:0002253 - activation of immune response	GO:0004402 - histone acetyltransferase activity	GO:0040037 - negative regulation of fibroblast growth factor receptor signaling pathway	GO:0070700 - BMP receptor binding	GO:0035791 - platelet-derived growth factor receptor-beta signaling pathway	GO:0071123 - alpha9-beta1 integrin-VEGF-C complex	GO:2000050 - regulation of non-canonical Wnt signaling pathway	GO:0070374 - positive regulation of ERK1 and ERK2 cascade	GO:0038143 - ERBB3:ERBB2 complex	GO:0032526 - response to retinoic acid	GO:0043087 - regulation of GTPase activity	GO:0045880 - positive regulation of smoothened signaling pathway
	GO:0044786 - cell cycle DNA replication	GO:0042116 - macrophage activation	GO:0004407 - histone deacetylase activity	GO:0045743 - positive regulation of fibroblast growth factor receptor signaling pathway		GO:2000583 - regulation of platelet-derived growth factor receptor-alpha signaling pathway	GO:0071121 - alpha9-beta1 integrin-VEGF-D complex	GO:2000052 - positive regulation of non-canonical Wnt signaling pathway	GO:0004709 - MAP kinase kinase kinase	GO:0038129 - ERBB3 signaling pathway			GO:0060830 - ciliary receptor clustering involved in smoothened signaling pathway
	GO:0045786 - negative regulation of cell cycle	GO:0006974 - DNA damage response	GO:0035097 - histone methyltransferase complex	GO:0005105 - type 1 fibroblast growth factor receptor binding		GO:1990270 - platelet-derived growth factor receptor-ligand complex	GO:0071122 - alpha9-beta1 integrin-VEGF-A complex	GO:2000051 - negative regulation of non-canonical Wnt signaling pathway	GO:0004708 - MAP kinase kinase activity	GO:0038133 - ERBB2-ERBB3 signaling pathway			GO:0003435 - smoothened signaling pathway involved in growth plate cartilage chondrocyte development
	GO:0045787 - positive regulation of cell cycle	GO:0043247 - telomere maintenance in response to DNA damage	GO:0070076 - histone lysine demethylation	GO:0005111 - type 2 fibroblast growth factor receptor binding		GO:2000587 - negative regulation of platelet-derived growth factor receptor-beta signaling pathway	GO:1990150 - VEGF-A complex	GO:0044332 - Wnt signaling pathway involved in dorsal/ventral axis specification	GO:0071848 - positive regulation of ERK1 and ERK2 cascade via TNFSF11-mediated signaling	GO:1905578 - regulation of ERBB3 signaling pathway
	GO:0010564 - regulation of cell cycle process	GO:0043516 - regulation of DNA damage response, signal transduction by p53 class mediator	GO:0035064 - methylated histone binding			GO:2000588 - positive regulation of platelet-derived growth factor receptor-beta signaling pathway	GO:0010573 - vascular endothelial growth factor production		GO:0004707 - MAP kinase activity	GO:1905579 - negative regulation of ERBB3 signaling pathway
	GO:0007346 - regulation of mitotic cell cycle	GO:0042770 - signal transduction in response to DNA damage	GO:0032452 - histone demethylase activity			GO:2000584 - negative regulation of platelet-derived growth factor receptor-alpha signaling pathway	GO:0038088 - VEGF-activated platelet-derived growth factor receptor-beta signaling pathway			GO:1905580 - positive regulation of ERBB3 signaling pathway
		GO:0000077 - DNA damage checkpoint signaling				GO:2000585 - positive regulation of platelet-derived growth factor receptor-alpha signaling pathway	GO:0038087 - VEGF-activated platelet-derived growth factor receptor-alpha signaling pathway			GO:0038134 - ERBB2-EGFR signaling pathway
		GO:0043555 - regulation of translation in response to stress					GO:0043183 - vascular endothelial growth factor receptor 1 binding
		GO:0006950 - response to stress					GO:0048010 - vascular endothelial growth factor receptor signaling pathway
		GO:0033554 - cellular response to stress					GO:0005021 - vascular endothelial growth factor receptor activity
		GO:0080134 - regulation of response to stress
		GO:0033555 - multicellular organismal response to stress

## Sheet: S4.4 Limb Patterning
Supplemental Data Table 4.4: Limb Patterning vs Wound from H3K27me3 Cut-and-Run data (Supplemental Fig 5)
gene_names	Annot	ALM_log	ALM_p	SU_log	SU_p	LDN_log	LDN_p	DU_log	DU_p	min p
DSCAML1.TSS +83494	-intron (DSCAML1|AMEX60DD201053913.1, intron 2 of 31)	2.38513	0.000219273	0.746209	0.245734	0.173895	0.809592	0.944369	0.144637	0.000219273
LHX3.TSS +10545	-intron (LHX3|AMEX60DD201050656.1, intron 1 of 5)	1.61329	0.00177145	0.514354	0.309933	0.293562	0.596055	0.340157	0.509027	0.00177145
PRICKLE1.TSS +1864	-intron (PRICKLE1|AMEX60DD201006371.1, intron 1 of 7)	-1.36956	0.00221861	-0.116275	0.771118	0.431224	0.29763	-0.870115	0.0336484	0.00221861
CHRD.TSS +34413	-intron (CHRD|AMEX60DD201001527.1, intron 22 of 22)	1.45496	0.00238619	-0.118445	0.803234	0.254766	0.620194	0.104852	0.826872	0.00238619
HES5.TSS -8352	-intron (AMEX60DD301051346.1, intron 1 of 1)	-1.85006	0.00260672	-0.0739371	0.87609	-0.140718	0.786727	-0.32122	0.507729	0.00260672
EMX2.TSS +222434	Intergenic	-1.44574	0.00323553	-1.068	0.0211544	-0.932666	0.0552151	-1.11487	0.0169822	0.00323553
TLL1.TSS +11567	-intron (TLL1, intron 1 of 20)	1.71993	0.00825064	1.47807	0.0177074	1.92279	0.00312865	1.96677	0.0015943	0.0015943
BARX1.TSS +3098	-intron (BARX1|AMEX60DD102023676.2, intron 1 of 2)	-1.6517	0.00842259	-0.610446	0.285115	0.946204	0.100686	-0.769343	0.182239	0.00842259
EMX2.TSS +8458	-intron (EMX2|AMEX60DD201053236.1, intron 2 of 2)	-1.74981	0.00913489	-0.98985	0.087306	0.884256	0.129434	-1.23365	0.0374656	0.00913489
ZBTB16.TSS -202189	Intergenic	0.957676	0.00940722	-0.0745535	0.836451	-0.181985	0.643647	0.363181	0.315014	0.00940722
DISP1.TSS +130525	Intergenic	1.89618	0.0100647	0.829567	0.253793	-0.0596795	0.941014	0.493176	0.503969	0.0100647
GLI1.TSS +41078	-intron (GLI1|AMEX60DD201029758.1, intron 1 of 11)	-1.24418	0.0115648	-1.10764	0.0109068	-0.8498	0.0763291	-0.994387	0.0242726	0.0109068
FBN2.TSS +1415	-intron (FBN2|AMEX60DD201042923.1, intron 1 of 64)	-0.746631	0.0122039	0.112743	0.674403	0.0354898	0.901837	-0.0196319	0.942393	0.0122039
GLI2.TSS -100650	-intron (GLI2|AMEX60DD201056125.3, intron 2 of 13)	-1.53569	0.0122311	-1.27964	0.0183522	-0.80113	0.171198	-1.13938	0.0379522	0.0122311
FGF8.TSS -943158	Intergenic	-1.28508	0.0134464	-1.09488	0.0219144	-0.557999	0.269416	-0.794827	0.0975983	0.0134464
DLX5.TSS +10351		1.77969	0.013791	0.625706	0.377101	2.06717	0.00417086	1.22629	0.0823321	0.00417086
CDX1.TSS +16146	-intron (CDX1-HOMER2, intron 1 of 2)	1.32303	0.0138461	-0.284066	0.595287	-0.183114	0.75248	-0.267025	0.622081	0.0138461
DISP1.TSS +197368	Intergenic	-1.54618	0.0163301	0.156943	0.735879	0.213962	0.675747	-0.347953	0.474895	0.0163301
SOX9.TSS -1673218		1.18905	0.0172292	1.19462	0.0134509	1.26027	0.0122151	0.752599	0.123946	0.0122151
NFIA.TSS -188863		-1.08474	0.0175756	-0.356664	0.370899	-0.40498	0.354299	-0.491689	0.225836	0.0175756
SEMA3C.TSS -210690	Intergenic	1.09743	0.0180151	0.753113	0.087471	0.574439	0.232316	0.193786	0.670196	0.0180151
ACVRL1.TSS +1784	-intron (ACVRL1|AMEX60DD201030013.1, intron 1 of 9)	0.913439	0.018394	1.35935	0.000305433	1.59346	3.44e-05	1.36417	0.000304205	3.44e-05
CACNA1C.TSS +125488	-intron (CACNA1C|AMEX60DD201006925.1, intron 4 of 44)	1.1739	0.0195252	1.04493	0.0342297	0.976009	0.0548851	0.929526	0.060785	0.0195252
BHLHE40.TSS -12608	-intron (AMEX60DD301023578.1, intron 2 of 2)	1.37845	0.0219762	-0.344147	0.566593	-0.250675	0.700123	-0.0104581	0.986154	0.0219762
RSPO2.TSS +218338	-intron (RSPO2|AMEX60DD301040292.1, intron 2 of 5)	-1.0307	0.0225126	-1.22818	0.00364151	-1.33517	0.00423806	-1.08734	0.0107726	0.00364151
FGF4.TSS +161892	-exon (FGF4, exon 6 of 6)	-1.55595	0.022607	-1.14638	0.0687269	-1.09251	0.105129	-0.938083	0.138452	0.022607
MEGF8.TSS -230636	-intron (MONAX_5E043606, intron 23 of 23)	-1.19382	0.0236631	-0.902041	0.070823	-0.610547	0.241772	-0.947961	0.0596884	0.0236631
DISP1.TSS +351659	Intergenic	-1.06509	0.023878	-0.200826	0.648044	-0.1442	0.753554	-0.501648	0.259148	0.023878
NFIA.TSS -254155		-1.23451	0.0243679	-1.28445	0.0120263	-0.659248	0.221161	-0.96313	0.0606598	0.0120263
COL2A1.TSS -660570	Intergenic	-1.46313	0.0248079	-0.698709	0.217535	0.0159984	0.978587	-0.612665	0.284853	0.0248079
GLI1.TSS +4260	-intron (GLI1|AMEX60DD201029758.1, intron 1 of 11)	-1.45896	0.0257419	-0.290023	0.621374	0.535063	0.375133	-0.610111	0.30553	0.0257419
HEY2.TSS +669588	Intergenic	1.01831	0.0267869	0.656437	0.137595	1.03769	0.0254616	0.68401	0.125158	0.0254616
CHST11.TSS +79123	-intron (CHST11|AMEX60DD201008366.1, intron 2 of 2)	1.13906	0.0267941	0.258745	0.603923	0.357523	0.508423	0.50103	0.318063	0.0267941
TBXT.TSS -147	none	-1.18756	0.026814	-0.431283	0.384506	-0.702502	0.185118	-0.334968	0.501851	0.026814
HOXC11.TSS -116351	Intergenic	-1.16458	0.0284887	-0.655427	0.160081	-0.677754	0.188519	-0.786333	0.0987116	0.0284887
DISP1.TSS +563144	Intergenic	1.09097	0.0287452	-0.0234298	0.961638	0.341705	0.513804	-0.266155	0.594084	0.0287452
HES5.TSS +398	-intron (AMEX60DD301051346.1, intron 1 of 1)	1.39377	0.0293447	0.568485	0.370171	0.574981	0.378124	0.595942	0.349096	0.0293447
SHOX2.TSS +404192	Intergenic	1.58492	0.0316709	-0.139277	0.850057	0.718749	0.341893	-0.163207	0.826062	0.0316709
GLI2.TSS +208464	-intron (GLI2|AMEX60DD201056125.3, intron 2 of 13)	1.30155	0.0317696	-0.0698259	0.907104	0.608024	0.335076	0.156372	0.795218	0.0317696
CACNA1C.TSS -18386	Intergenic	1.20429	0.0320911	1.04757	0.0555651	1.12421	0.0479044	1.14511	0.037143	0.0320911
SKI.TSS -144954	Intergenic	1.46373	0.032193	1.12794	0.0874736	2.0168	0.00292218	1.14904	0.0840958	0.00292218
EMX2.TSS -367277	Intergenic	1.04752	0.0324363	0.227528	0.633887	0.0681289	0.895209	-0.257877	0.598171	0.0324363
ALX4.TSS +19293	-intron (ALX4|AMEX60DD201005188.1, intron 1 of 3)	1.03811	0.0325281	0.101316	0.830917	0.513089	0.306286	0.097223	0.839448	0.0325281
DKK1.TSS +10379	Intergenic	1.09178	0.0328952	-0.248009	0.623562	-0.362549	0.513199	-0.217379	0.670793	0.0328952
HES5.TSS +3090	-TTS (HES5|AMEX60DD301051347.1)	1.26766	0.0330842	0.797953	0.161985	0.622195	0.31561	0.563721	0.331939	0.0330842
LHX3.TSS +272816	Intergenic	-1.14082	0.0351586	-1.05732	0.0249292	-1.36738	0.0129115	-1.17647	0.0154881	0.0129115
HHEX.TSS -408697	Intergenic	1.36695	0.0353915	0.927468	0.134354	1.16455	0.0777549	0.81878	0.19329	0.0353915
TBX1.TSS -363412	Intergenic	1.43315	0.0356206	-0.0470282	0.94451	-0.284616	0.705026	0.758444	0.257716	0.0356206
ZBTB16.TSS +125584	-intron (ZBTB16|AMEX60DD201053674.1, intron 2 of 6)	1.50308	0.0361128	0.309194	0.661062	0.425115	0.576074	0.386249	0.587726	0.0361128
EMX2.TSS -68681	Intergenic	1.25077	0.0362024	-0.235468	0.691404	0.930861	0.125476	-0.258915	0.665911	0.0362024
PCSK5.TSS -211557		0.96185	0.0366577	0.578293	0.196119	0.312975	0.511621	0.568362	0.207195	0.0366577
FBN2.TSS -641746	Intergenic	-0.989556	0.0368221	-1.04837	0.017798	-1.17399	0.0156877	-0.874837	0.0497119	0.0156877
FGF4.TSS -140596	Intergenic	-1.59706	0.0373365	-1.00561	0.146853	-0.133346	0.85279	-0.600834	0.386814	0.0373365
ALX4.TSS +21531	-intron (ALX4|AMEX60DD201005188.1, intron 1 of 3)	-1.43977	0.0386275	-1.44526	0.0217964	-0.369321	0.574281	-0.937234	0.13632	0.0217964
DSCAML1.TSS +27249	-intron (DSCAML1|AMEX60DD201053913.1, intron 1 of 31)	-1.14943	0.0387974	-0.932854	0.0613035	-1.2315	0.029113	-1.04399	0.040234	0.029113
PTCH1.TSS +39652	-exon (DR999_PMT00930, exon 6 of 24)	-1.36953	0.0400676	-0.88888	0.133171	-1.13361	0.0864271	-0.727275	0.223347	0.0400676
CHRD.TSS +5838	-intron (CHRD|AMEX60DD201001527.1, intron 2 of 22)	0.562017	0.040752	0.699549	0.00813753	0.609244	0.0279456	0.395106	0.139079	0.00813753
EMX2.TSS -399016	Intergenic	1.90236	0.0422846	-0.776593	0.413288	1.28413	0.176986	0.269137	0.774738	0.0422846
DSCAML1.TSS +11116	-intron (DSCAML1|AMEX60DD201053913.1, intron 1 of 31)	-0.630728	0.0425733	0.358557	0.210013	0.422215	0.159049	0.0429033	0.882178	0.0425733
PAX6.TSS +24222	-intron (AMEX60DD301004906.1, intron 2 of 2)	-0.600685	0.0438153	-0.114536	0.688737	0.24429	0.405521	-0.0398565	0.889563	0.0438153
GLI2.TSS +77884	-intron (GLI2|AMEX60DD201056125.4, intron 1 of 13)	1.3924	0.0451955	-0.650269	0.351455	0.471828	0.509685	-0.977827	0.169146	0.0451955
FGF10.TSS +1830	-intron (FGF10|AMEX60DD201042028.1, intron 1 of 2)	-0.48719	0.0469644	-0.434735	0.0657743	-0.471591	0.057059	-0.337322	0.155333	0.0469644
ALDH1A2.TSS -124766	Intergenic	-1.18313	0.0484611	0.108417	0.821131	0.210501	0.687705	0.0671609	0.890521	0.0484611
LNPK.TSS -136555	Intergenic	-0.975989	0.0497243	-1.21128	0.00984728	-1.53476	0.0032778	-0.762721	0.104351	0.0032778

## Sheet: S4.5 Cell Cycle
Supplemental Data Table 4.5: Cell Cycle vs Wound from H3K27me3 Cut-and-Run data (Supplemental Fig 5)
gene_names	Annot	ALM_log	ALM_p	SU_log	SU_p	LDN_log	LDN_p	DU_log	DU_p	min p
MBIP.TSS -567021	Intergenic	3.0264	3.84e-05	1.79859	0.0135004	1.63329	0.0344613	1.37838	0.0625677	3.84e-05
PARD6A.TSS -30110	Intergenic	2.36405	0.000139635	0.929958	0.131159	1.51814	0.0180944	1.77143	0.00382557	0.000139635
EDNRA.TSS +405	-intron (EDNRA|AMEX60DD301045012.1, intron 1 of 7)	3.24598	0.000970528	-0.64682	0.517679	1.07091	0.2877	-0.591609	0.556844	0.000970528
CDK20.TSS +420167	Intergenic	-1.13809	0.00118088	-1.20844	0.000140069	-0.993031	0.00454749	-1.07557	0.000820404	0.000140069
ETS1.TSS -33736	-intron (ETS1|AMEX60DD201053603.1, intron 3 of 9)	-2.18158	0.00209427	-0.692895	0.239936	-1.09035	0.0947017	-0.771124	0.196835	0.00209427
MAPRE1.TSS -268445	Intergenic	-1.811	0.0034347	-0.223694	0.694577	0.016531	0.977462	-0.574448	0.317132	0.0034347
WDHD1.TSS +39947	Intergenic	1.66422	0.00399218	0.0979948	0.864667	0.190697	0.757829	0.173512	0.764993	0.00399218
MAPK4.TSS +484759	-intron (MAPK4|AMEX60DD201041755.1, intron 3 of 6)	-1.43376	0.00437006	-1.09801	0.0160224	-1.61714	0.00172127	-0.980519	0.0331467	0.00172127
ARF6.TSS -93571	Intergenic	-1.75317	0.00498271	-2.10971	0.000226313	-1.56186	0.0120491	-1.47068	0.00962501	0.000226313
TUBB3.TSS +1790	-intron (LOC115060730, intron 1 of 4)	0.882737	0.00501459	1.3237	1.64e-05	1.25851	6.26e-05	1.28748	2.92e-05	1.64e-05
CCND1.TSS -609760	Intergenic	1.31013	0.00503413	0.48564	0.281316	0.764945	0.113928	0.782323	0.0840657	0.00503413
FIGN.TSS +47233	-intron (FIGN|AMEX60DD201055759.1, intron 1 of 1)	-1.33304	0.00507368	-1.30121	0.00156463	-1.54456	0.00133576	-1.58144	0.000238169	0.000238169
CEP164.TSS +412225	Intergenic	1.37846	0.00512391	0.0404218	0.933749	0.38971	0.452608	0.431789	0.375483	0.00512391
ADARB1.TSS +930714	Intergenic	-1.74486	0.00512694	-0.75044	0.187002	-0.62845	0.292801	-0.568678	0.319437	0.00512694
RPS6.TSS -11392		-0.942184	0.00520524	-0.814676	0.00831424	-0.976459	0.00429666	-0.971442	0.00202575	0.00202575
GRK5.TSS +2041	-intron (GRK5.L, intron 1 of 16)	1.96296	0.00539454	1.41871	0.0421377	1.31326	0.0671423	1.34008	0.0558154	0.00539454
BRSK1.TSS +58435	-intron (BRSK1, intron 3 of 78)	1.54456	0.00546435	0.619744	0.253852	0.934782	0.104405	0.429829	0.436264	0.00546435
MISP.TSS +116887	-intron (MISP, intron 6 of 34)	1.06528	0.0057234	0.378148	0.310588	0.257154	0.52597	0.323387	0.39205	0.0057234
FBXL7.TSS -281322	-intron (FBXL7, intron 6 of 12)	1.37889	0.00587206	0.789831	0.106647	0.406751	0.437427	0.768916	0.118906	0.00587206
ETS1.TSS -21585	-intron (ETS1|AMEX60DD201053603.1, intron 3 of 9)	1.93733	0.00609336	1.19809	0.0832258	1.13625	0.121263	1.08728	0.119588	0.00609336
GAS1.TSS -307836	Intergenic	1.95376	0.00652448	1.07645	0.127201	0.87064	0.247813	1.18563	0.094892	0.00652448
CCNA1.TSS +1391	-exon (CCNA1|AMEX60DD201049191.1, exon 2 of 9)	-1.01839	0.00720433	-0.549847	0.1251	-0.553126	0.141711	-0.582521	0.106593	0.00720433
SIK1.TSS -131987	Intergenic	0.979977	0.00776021	0.0564143	0.874489	0.0848009	0.827902	-0.0913402	0.801982	0.00776021
RINT1.TSS +54358	Intergenic	1.11077	0.00781435	1.20963	0.00216856	1.33593	0.00136667	1.23135	0.00196938	0.00136667
NEK1.TSS +213629	-intron (NEK1, intron 6 of 31)	-2.62023	0.0084799	-0.943598	0.255394	-1.14394	0.20286	0.0653239	0.936774	0.0084799
GRK5.TSS +63303	-intron (GRK5.L, intron 1 of 16)	2.06887	0.00869929	1.29414	0.0923467	1.08241	0.191173	1.30038	0.0938961	0.00869929
KLHL13.TSS -583727	Intergenic	-1.11545	0.00879431	-0.883418	0.015689	-0.978683	0.0188968	-0.522873	0.154245	0.00879431
IST1.TSS +103352	-intron (IST1|AMEX60DD201016968.1, intron 1 of 6)	0.982799	0.0103327	-0.2875	0.446063	0.757765	0.0524483	0.116351	0.758204	0.0103327
THAP5.TSS +216138	Intergenic	-1.53812	0.0119093	-1.4004	0.0120282	-0.881753	0.137933	-1.09409	0.0508394	0.0119093
BAP1.TSS -357	-promoter-TSS (BAP1|AMEX60DD301024076.1)	-1.40798	0.0120325	-1.51706	0.00283222	-0.7205	0.182207	-0.846834	0.093264	0.00283222
NEDD9.TSS +117066	Intergenic	-1.66434	0.0124252	0.173908	0.757754	-0.746322	0.233259	-0.0698507	0.902623	0.0124252
USP2.TSS -17785	-intron (USP2, intron 1 of 3)	1.95119	0.0147918	2.13949	0.00502827	2.26515	0.00444184	1.98446	0.00997284	0.00444184
MCIDAS.TSS +137470	Intergenic	-0.971378	0.0158509	-0.1063	0.771741	-0.783933	0.0518427	-0.476628	0.200645	0.0158509
CCND2.TSS +732	-intron (CCND2|AMEX60DD201006581.1, intron 2 of 4)	0.97754	0.0161382	0.368398	0.343475	1.04958	0.0102441	0.778993	0.045455	0.0102441
TRIM36.TSS +145	-exon (TRIM36|AMEX60DD201042779.1, exon 1 of 10)	0.655215	0.0161536	0.599348	0.0213518	0.878429	0.00129276	0.550839	0.0360575	0.00129276
UBE2L3.TSS -172090	Intergenic	1.58879	0.0162732	0.461631	0.476049	1.04133	0.127537	0.661122	0.310907	0.0162732
RB1CC1.TSS +1187439	Intergenic	-1.29328	0.0167562	-1.25023	0.0124855	-0.799228	0.133378	-0.776101	0.121007	0.0124855
SOX9.TSS -1673218		1.18905	0.0172292	1.19462	0.0134509	1.26027	0.0122151	0.752599	0.123946	0.0122151
CCNO.TSS -190780	Intergenic	-1.13534	0.0172426	-0.448568	0.30462	-1.6042	0.00129456	-0.555401	0.208661	0.00129456
HMCN1.TSS -98887	-intron (HMCN1|AMEX60DD201018555.1, intron 8 of 12)	1.283	0.0176598	0.113383	0.829515	0.912126	0.0996837	0.507713	0.335633	0.0176598
SNX33.TSS -32431	Intergenic	-1.25779	0.0185024	-0.855218	0.0617406	-0.285384	0.563026	-0.0395965	0.93019	0.0185024
BRCA1.TSS +648277	Intergenic	0.997405	0.0192461	1.09389	0.00718662	1.13347	0.00814648	0.772093	0.0611848	0.00718662
CIT.TSS -392	-promoter-TSS (CIT|AMEX60DD201000535.11)	1.1676	0.0192757	0.750907	0.122998	0.538571	0.295395	0.346003	0.483046	0.0192757
GATA3.TSS +3103	-intron (GATA3|AMEX60DD201008149.3, intron 2 of 5)	1.3593	0.0196557	-0.659578	0.258801	0.938529	0.111293	-0.305982	0.60107	0.0196557
GNAI1.TSS -183627	Intergenic	1.57777	0.0197498	0.391341	0.556904	1.01805	0.14473	0.384114	0.568799	0.0197498
GNAI1.TSS -385077	Intergenic	1.27646	0.0197687	0.152007	0.775607	-0.0156148	0.979063	0.0559829	0.918184	0.0197687
BIRC7.TSS -15525	Intergenic	1.05139	0.0197932	0.765989	0.0741884	0.303341	0.522467	0.545082	0.21197	0.0197932
PTP4A1.TSS -660171	Intergenic	-0.836766	0.0198643	-0.773563	0.0153324	-0.782717	0.0288961	-0.835516	0.0105023	0.0105023
CDK14.TSS +25864	-exon (CDK14|AMEX60DD103022202.9, exon 2 of 17)	1.00255	0.0207186	-0.487231	0.255427	0.561808	0.209249	-0.199154	0.644117	0.0207186
BTG4.TSS +111869	Intergenic	0.618233	0.0208748	0.274363	0.294008	0.0989803	0.718428	0.0859941	0.744241	0.0208748
MELK.TSS -383598	Intergenic	1.28914	0.0211367	0.723164	0.181199	0.384993	0.513861	0.302513	0.584088	0.0211367
BRSK1.TSS +126368	-intron (BRSK1, intron 3 of 78)	1.30447	0.0212162	-0.206573	0.71281	0.0913397	0.880099	-0.0547882	0.922976	0.0212162
NEDD1.TSS +132641	-intron (NEDD1|AMEX60DD201007829.1, intron 1 of 11)	-0.847073	0.02241	-0.763914	0.0265321	-0.890664	0.0181076	-0.853852	0.0145574	0.0145574
MSH2.TSS +3032576	Intergenic	-1.09542	0.0226479	-0.896269	0.0473829	-0.726445	0.128943	-0.914485	0.0450257	0.0226479
WNT10B.TSS -341101	Intergenic	1.24931	0.0229533	-1.62697	0.00440406	-0.416263	0.485344	-0.776587	0.166643	0.00440406
BRCA1.TSS +865667	Intergenic	-1.16998	0.0234868	-0.576387	0.217546	-0.164823	0.738475	-0.49935	0.289666	0.0234868
TXNL4B.TSS +139912	Intergenic	-1.40566	0.0237469	-1.41855	0.0114217	-0.673022	0.25946	-1.48862	0.00938898	0.00938898
MBIP.TSS -201619	Intergenic	1.2804	0.02486	-0.191608	0.735718	0.373128	0.526127	-0.278333	0.627217	0.02486
ERCC6L.TSS +611		-0.971779	0.025357	-0.623449	0.129164	-0.824763	0.0593193	-0.775795	0.0615306	0.025357
FZD9.TSS -516795	Intergenic	1.70002	0.0253653	-0.116958	0.877754	0.393586	0.619171	-0.375946	0.625913	0.0253653
SPAG8.TSS +117563	-intron (LOC115082284, intron 9 of 10)	-0.807304	0.0274685	-0.443246	0.197758	-0.4727	0.19549	-0.549564	0.11383	0.0274685
FIGNL1.TSS +126555	-exon (DDC|AMEX60DD201038234.1, exon 18 of 18)	-1.72992	0.0294747	-0.714629	0.278818	0.0509539	0.941635	0.161095	0.805128	0.0294747
STAG3.TSS +746853	-intron (STAG3, intron 26 of 74)	-0.907429	0.0297896	-0.698522	0.0827138	-0.68714	0.101032	-0.415757	0.302711	0.0297896
PRNP.TSS -1522973	Intergenic	-1.21456	0.0318048	-0.966959	0.0518166	-0.879505	0.111544	-0.582422	0.242747	0.0318048
GAS1.TSS -1216173	Intergenic	1.56978	0.032069	0.0927596	0.898673	-0.23775	0.761893	0.390397	0.593069	0.032069
SLC6A4.TSS +91636	-intron (SLC6A4|AMEX60DD201054806.1, intron 1 of 14)	-1.78873	0.0321614	-0.769495	0.293169	0.878796	0.235104	-0.66431	0.367981	0.0321614
NEDD9.TSS +30478	-intron (NEDD9|AMEX60DD201039174.1, intron 2 of 6)	-1.40642	0.0321995	-0.141755	0.804934	-0.732956	0.246669	-0.353571	0.543528	0.0321995
CCNA1.TSS +123351	Intergenic	-1.16767	0.032863	-1.51367	0.00223646	-0.541351	0.302294	-1.32367	0.00833586	0.00223646
LIN9.TSS +243220	Intergenic	-1.24483	0.0328643	-0.986876	0.0544448	-1.72648	0.00469577	-1.12889	0.0319322	0.00469577
USP2.TSS -864	-promoter-TSS (USP2|AMEX60DD201053834.26)	1.134	0.0329851	-0.164829	0.752074	0.513959	0.353715	0.187573	0.72016	0.0329851
HSP90AB1.TSS +88953		-1.03928	0.0334912	-0.334103	0.475006	0.363008	0.445619	-0.304756	0.516274	0.0334912
SRC.TSS -54593	-intron (SRC|AMEX60DD201028683.1, intron 1 of 12)	1.59148	0.0337534	1.54568	0.0297526	1.53231	0.0426222	0.655358	0.37417	0.0297526
RACK1.TSS -1296033	Intergenic	-0.726383	0.0341512	-0.681953	0.0355393	-0.366146	0.283888	-0.420774	0.196375	0.0341512
FBXL7.TSS +1174	-intron (FBXL7, intron 2 of 12)	-0.876592	0.0359153	0.0919665	0.810786	0.100674	0.803146	-0.178513	0.645895	0.0359153
RARA.TSS +93810	-intron (RARA, intron 1 of 14)	1.23668	0.0359705	1.60413	0.00448576	1.41307	0.0169793	0.805246	0.161461	0.00448576
GADD45A.TSS -298012		-1.48775	0.0364863	-1.06789	0.098897	-1.12059	0.111386	-1.01367	0.121022	0.0364863
CDC16.TSS -28656	Intergenic	-0.761747	0.0368891	0.0118646	0.971619	0.472245	0.174541	0.121451	0.717422	0.0368891
CDKN2C.TSS +439608		1.10015	0.0369922	-0.296268	0.568978	0.0899591	0.872583	0.0226357	0.965449	0.0369922
RGS14.TSS -58574	-intron (RGS14|AMEX60DD201027889.4, intron 2 of 11)	-1.03227	0.0375572	-0.276054	0.536201	-0.310091	0.518564	-0.102258	0.819863	0.0375572
RGCC.TSS -61649	Intergenic	1.20246	0.0377079	-0.39959	0.487376	0.543142	0.365193	0.643602	0.257086	0.0377079
MCM3.TSS -92388	Intergenic	0.600779	0.038185	-0.0144317	0.958601	0.0890716	0.767463	0.000437775	0.99876	0.038185
TIMELESS.TSS +135109	Intergenic	-1.07055	0.038194	-0.2075	0.670088	-0.442187	0.38597	0.0170861	0.972086	0.038194
NDP.TSS -153685	Intergenic	-1.07317	0.0384331	-0.656255	0.183488	-1.20208	0.0227904	-0.679952	0.170829	0.0227904
JADE1.TSS -259875	Intergenic	0.920002	0.03878	0.11065	0.797132	-0.11259	0.813135	0.0668086	0.878486	0.03878
CEP164.TSS +294034	Intergenic	-1.27907	0.0389804	-1.00998	0.0781915	-0.278606	0.640894	-0.537029	0.349126	0.0389804
HMCN1.TSS -136944	-intron (HMCN1|AMEX60DD201018556.1, intron 18 of 29)	1.10876	0.0397163	-0.500373	0.35104	-0.808661	0.173932	-0.227946	0.672471	0.0397163
SYCP3.TSS -716	-promoter-TSS (SYCP3|AMEX60DD103008359.1)	-0.95265	0.0398367	-1.33374	0.00171414	-1.2154	0.010789	-1.7154	0.000114131	0.000114131
MYBL2.TSS +966910	Intergenic	0.736887	0.0416591	0.613397	0.0773429	0.539621	0.143545	0.486341	0.165722	0.0416591
BRINP2.TSS +465302	-intron (BRINP2|AMEX60DD201018245.1, intron 6 of 7)	1.13391	0.0419924	-0.298804	0.588416	-0.933597	0.136712	-0.207027	0.710498	0.0419924
USP2.TSS +1033	-intron (USP2, intron 1 of 3)	-1.15589	0.0421747	-0.031593	0.950576	0.525477	0.320405	-0.346254	0.50317	0.0421747
ERH.TSS +158585	Intergenic	1.24759	0.0425138	1.20875	0.0406464	1.40075	0.0233821	0.960174	0.108052	0.0233821
PRDM5.TSS -21030	Intergenic	-1.64676	0.0425935	-0.607552	0.40811	-0.998479	0.207613	-1.37623	0.06777	0.0425935
CENPW.TSS -1336526	Intergenic	1.48911	0.042699	-0.215809	0.768394	0.517397	0.502063	0.47183	0.517422	0.042699
PRDM5.TSS +59475	-exon (PRDM5|AMEX60DD301044918.1, exon 2 of 18)	1.18259	0.0427985	0.483033	0.388828	0.587765	0.333076	0.484813	0.393787	0.0427985
RPS6KA1.TSS -74942	-intron (RPS6KA1|AMEX60DD201005642.1, intron 2 of 22)	1.1178	0.045365	1.01819	0.0594356	0.724164	0.206065	0.312453	0.57047	0.045365
DCDC1.TSS -169806	Intergenic	1.10221	0.0460348	-0.819873	0.140168	-0.784781	0.209118	-0.264953	0.632009	0.0460348
TUBB3.TSS -497	none	1.07377	0.0460502	0.213293	0.688604	0.179464	0.745863	0.218748	0.682542	0.0460502
CTDP1.TSS -176775	Intergenic	-1.09494	0.0468594	-0.419087	0.375347	-0.271034	0.600245	-0.417191	0.385141	0.0468594
FGF10.TSS +1830	-intron (FGF10|AMEX60DD201042028.1, intron 1 of 2)	-0.48719	0.0469644	-0.434735	0.0657743	-0.471591	0.057059	-0.337322	0.155333	0.0469644
CCDC124.TSS -182555	Intergenic	-1.2624	0.0474484	-1.11476	0.0475086	-0.983439	0.115762	-0.366203	0.510798	0.0474484
CENPW.TSS -2042937	Intergenic	-1.16385	0.0483388	-0.787547	0.157488	-1.16912	0.0503767	-0.318905	0.567175	0.0483388
SEPTIN12.TSS +8832		-1.42687	0.0485822	-0.43274	0.478248	-0.58849	0.38437	0.313439	0.605087	0.0485822
CENPW.TSS -373635	Intergenic	-1.5129	0.0487472	-1.25538	0.083114	-0.307554	0.678807	-0.968416	0.182627	0.0487472

## Sheet: S4.6 Immune&Stress
Supplemental Data Table 4.6: Immune&Stress vs Wound from H3K27me3 Cut-and-Run data (Supplemental Fig 5)
gene_names	Annot	ALM_log	ALM_p	SU_log	SU_p	LDN_log	LDN_p	DU_log	DU_p	min p
HROB.TSS -150031	Intergenic	2.40934	2.35e-05	1.24869	0.0264711	1.40259	0.0181607	0.970088	0.089448	2.35e-05
ZNF683.TSS +120159	-intron (ZNF683, intron 4 of 15)	-1.81666	5.67e-05	-1.26037	0.000708868	-1.2062	0.0041376	-2.06083	3.16e-07	3.16e-07
TEX15.TSS +277110		2.95625	8.23e-05	0.214848	0.778284	0.692505	0.391002	0.0614672	0.93689	8.23e-05
FCER1G.TSS +113771		3.00706	0.000279868	1.82989	0.0252159	1.95934	0.0225552	2.38177	0.00352774	0.000279868
BATF.TSS -1580	-intron (FLVCR2|AMEX60DD301011157.11, intron 2 of 9)	-2.47555	0.000462895	-0.339961	0.473882	-0.219515	0.674996	-0.3222	0.504779	0.000462895
NEDD4.TSS -323152	Intergenic	-1.30707	0.000694446	-1.20813	0.000316489	-0.329918	0.35496	-1.42904	3.99e-05	3.99e-05
GPR65.TSS +13023	-intron (GALC|AMEX60DD201011235.1, intron 1 of 14)	3.74416	0.000860218	0.705453	0.531612	1.90188	0.0938393	0.500696	0.658385	0.000860218
ST6GAL1.TSS +288515	-intron (ST6GAL1, intron 13 of 20)	1.50767	0.00107787	0.512041	0.256239	0.712991	0.139137	0.764122	0.0918489	0.00107787
ENPP2.TSS +103065	-intron (ENPP2, intron 28 of 172)	-1.82252	0.00116675	-1.28123	0.00569844	-1.24229	0.0179007	-1.50467	0.00174595	0.00116675
TRAF2.TSS -727	-promoter-TSS (TRAF2|AMEX60DD301050929.6)	-1.81039	0.00176619	-1.85394	0.000212642	-0.454287	0.380251	-1.29896	0.00901933	0.000212642
ETS1.TSS -33736	-intron (ETS1|AMEX60DD201053603.1, intron 3 of 9)	-2.18158	0.00209427	-0.692895	0.239936	-1.09035	0.0947017	-0.771124	0.196835	0.00209427
AXL.TSS -72980	-intron (AXL|AMEX60DD301024484.1, intron 4 of 19)	-1.80915	0.00244808	-0.383238	0.423657	-0.855628	0.114936	-0.397732	0.413266	0.00244808
MAPT.TSS +1678	-intron (LOC108802437, intron 1 of 20)	2.06968	0.00275152	0.809452	0.23541	1.51707	0.0328085	0.550126	0.428706	0.00275152
MTOR.TSS +99141	-intron (MTOR|AMEX60DD301051133.1, intron 1 of 56)	1.02342	0.00298576	1.17918	0.000458216	0.799168	0.022218	0.914779	0.00688432	0.000458216
CCR7.TSS -54811	Intergenic	2.33679	0.00304148	2.62406	0.000499548	2.10687	0.00810402	2.44322	0.00131321	0.000499548
ENPP2.TSS -281	-promoter-TSS (ENPP2|AMEX60DD301040394.10)	-0.853955	0.0033598	-0.078737	0.774573	-0.539427	0.0637447	-0.222238	0.422123	0.0033598
YAP1.TSS -184214	Intergenic	1.65705	0.00413463	0.297533	0.600768	-0.0801197	0.900782	0.924134	0.10163	0.00413463
MACROD1.TSS -124277	Intergenic	-1.37893	0.00435752	-0.847628	0.0494439	-0.737532	0.115014	-0.931741	0.0335262	0.00435752
CCND1.TSS -609760	Intergenic	1.31013	0.00503413	0.48564	0.281316	0.764945	0.113928	0.782323	0.0840657	0.00503413
ENPP2.TSS -170548	-intron (ENPP2, intron 1 of 172)	2.21719	0.00511283	1.97755	0.0102074	1.90356	0.0182651	1.03783	0.188218	0.00511283
CEP164.TSS +412225	Intergenic	1.37846	0.00512391	0.0404218	0.933749	0.38971	0.452608	0.431789	0.375483	0.00512391
ADARB1.TSS +930714	Intergenic	-1.74486	0.00512694	-0.75044	0.187002	-0.62845	0.292801	-0.568678	0.319437	0.00512694
RAD18.TSS -526249	Intergenic	-1.56504	0.00527654	-1.54247	0.00175912	-1.35305	0.0142164	-1.70129	0.000833516	0.000833516
BRSK1.TSS +58435	-intron (BRSK1, intron 3 of 78)	1.54456	0.00546435	0.619744	0.253852	0.934782	0.104405	0.429829	0.436264	0.00546435
CHGA.TSS -956122	Intergenic	2.59117	0.00547532	0.11093	0.906062	1.16241	0.226498	0.363934	0.699676	0.00547532
ZMPSTE24.TSS -206244	Intergenic	2.6391	0.00577136	0.213224	0.824518	0.723513	0.466604	0.372488	0.699729	0.00577136
ETS1.TSS -21585	-intron (ETS1|AMEX60DD201053603.1, intron 3 of 9)	1.93733	0.00609336	1.19809	0.0832258	1.13625	0.121263	1.08728	0.119588	0.00609336
NRROS.TSS -216836	Intergenic	0.842362	0.00700038	-0.372214	0.220952	0.154016	0.638537	0.0844072	0.781166	0.00700038
NKX2-3.TSS +487735	Intergenic	-1.87576	0.00701046	-1.88574	0.00217074	-0.305963	0.626614	-1.50614	0.0146599	0.00217074
SFPQ.TSS +105906	Intergenic	-1.45409	0.00702143	-0.920275	0.0667527	-0.536557	0.305962	-0.9271	0.066946	0.00702143
C8B.TSS -48751		-1.50371	0.00704381	-1.99886	9.85e-05	-1.1284	0.0395012	-1.09455	0.0298305	9.85e-05
EDN2.TSS -1387	Intergenic	-1.29823	0.00708136	-1.18605	0.00521102	0.454331	0.293134	-1.52149	0.000571047	0.000571047
TCF7.TSS +14274	-intron (TCF7, intron 10 of 60)	-0.920348	0.00717235	-0.110877	0.733578	-0.313041	0.355752	-0.0576098	0.860148	0.00717235
SMAD6.TSS +1936	-intron (DV515_00006510, intron 1 of 2)	-0.807835	0.00729974	0.162169	0.565863	0.28322	0.332965	-0.0302869	0.91523	0.00729974
PTGER4.TSS -300851	Intergenic	-0.969253	0.00740415	-1.56404	3.38e-06	0.241895	0.477258	-1.11902	0.000889025	3.38e-06
PAG1.TSS +10878	-intron (PAG1|AMEX60DD201039989.12, intron 4 of 11)	-1.23875	0.0078235	-0.317915	0.431177	-0.213619	0.624485	-0.590423	0.152389	0.0078235
SMYD2.TSS -575559	Intergenic	3.01542	0.00864598	-0.133457	0.908151	1.58841	0.171643	0.3755	0.745457	0.00864598
MYO1G.TSS -349200		1.02775	0.00881776	1.27421	0.000734654	0.939761	0.0181555	1.07516	0.0047118	0.000734654
ACKR3.TSS +627895	Intergenic	-1.80052	0.00930319	-1.02859	0.085466	-0.923329	0.157138	-0.988326	0.102842	0.00930319
PAG1.TSS +99714	-intron (PAG1|AMEX60DD201039989.12, intron 1 of 11)	1.449	0.00971339	0.720229	0.191812	1.02687	0.0719737	1.26952	0.0213444	0.00971339
TNFRSF21.TSS -506374	Intergenic	-1.20646	0.0105126	-1.27983	0.00267328	-1.62608	0.000945208	-1.34813	0.00197908	0.000945208
NCF2.TSS -114678	Intergenic	1.53013	0.0107473	0.568792	0.33422	0.376367	0.553021	0.635821	0.28411	0.0107473
NOS1.TSS -598517	Intergenic	-1.12442	0.0109832	-0.952527	0.0213311	-0.136038	0.750853	-0.801901	0.0541754	0.0109832
LCK.TSS -160462	Intergenic	2.17313	0.0117435	-0.915344	0.29571	-0.0028544	0.997477	-0.683648	0.436981	0.0117435
COLEC12.TSS +86826	-intron (COLEC12|AMEX60DD301039466.1, intron 7 of 8)	1.73795	0.0119167	0.773405	0.252486	0.99143	0.168284	1.20691	0.0743655	0.0119167
ECSIT.TSS -29303	Intergenic	-1.81427	0.0121674	-0.585428	0.346042	-0.247737	0.706644	-0.147029	0.813087	0.0121674
BTK.TSS +402	-exon (BTK|AMEX60DD201037772.1, exon 1 of 10)	1.49664	0.0128579	0.908276	0.124272	0.706572	0.255265	0.622757	0.296608	0.0128579
JAM3.TSS +389	-intron (JAM3|AMEX60DD301053518.2, intron 1 of 8)	-1.27246	0.0132372	-0.599467	0.219422	-0.562142	0.267301	-0.782706	0.11139	0.0132372
ITGB6.TSS -501711	Intergenic	-1.14946	0.0134797	-0.670966	0.100739	-1.38553	0.00365184	-0.780423	0.0612924	0.00365184
LTB.TSS -130326	Intergenic	-1.56738	0.0135801	-0.927613	0.104357	-1.13372	0.069564	-0.415494	0.466702	0.0135801
EGLN3.TSS -368104	Intergenic	0.819582	0.0143836	1.12784	0.000525447	0.895625	0.00789081	1.08596	0.000884325	0.000525447
NLRC4.TSS +492	-intron (NLRC4|AMEX60DD201035246.1, intron 1 of 4)	-1.58426	0.0146959	-1.31341	0.0206751	0.142408	0.806845	-1.11005	0.0528807	0.0146959
SAMHD1.TSS +43377	-intron (SAMHD1, intron 2 of 32)	1.60984	0.0148627	1.7617	0.00466385	1.09279	0.107417	1.60854	0.0107246	0.00466385
CLU.TSS +1527	-intron (CLU|AMEX60DD201032706.1, intron 1 of 8)	-0.82187	0.0155382	-1.3086	3.96e-05	-0.19916	0.548308	-1.27295	8.4e-05	3.96e-05
SAMHD1.TSS +41259	-intron (SAMHD1, intron 2 of 32)	1.0835	0.0160209	1.2543	0.00313222	0.937846	0.040293	1.1957	0.00528798	0.00313222
PTPN11.TSS -35927	Intergenic	-1.79012	0.0163998	-0.52533	0.423992	-0.985896	0.168365	-0.631625	0.341556	0.0163998
C8B.TSS +1092		-1.26739	0.0165626	-1.11343	0.0262825	-0.844496	0.108381	-0.666825	0.18356	0.0165626
DDX1.TSS -566321	Intergenic	-0.914264	0.0167467	0.46338	0.21029	0.736872	0.0489222	0.788874	0.0330445	0.0167467
SEMA3C.TSS -210690	Intergenic	1.09743	0.0180151	0.753113	0.087471	0.574439	0.232316	0.193786	0.670196	0.0180151
NKX2-3.TSS +388562	Intergenic	-1.14874	0.0181007	-0.505694	0.271798	-0.654895	0.174676	-0.540802	0.242683	0.0181007
SMUG1.TSS +990241	Intergenic	-1.60708	0.0185056	-0.286573	0.642353	0.0628812	0.921666	-0.261474	0.673571	0.0185056
MYO1G.TSS -116379		-1.49197	0.0187173	-0.741567	0.150558	-0.313288	0.577422	-0.924191	0.0825698	0.0187173
PIK3CD.TSS -447644	Intergenic	0.653546	0.0188855	1.10128	4.72e-05	0.952611	0.000629103	1.02641	0.00015795	4.72e-05
BRCA1.TSS +648277	Intergenic	0.997405	0.0192461	1.09389	0.00718662	1.13347	0.00814648	0.772093	0.0611848	0.00718662
TNFSF11.TSS +344397	-intron (TNFSF11|AMEX60DD301049101.1, intron 4 of 4)	1.13507	0.0196409	0.158297	0.739633	-0.0378886	0.941784	0.133545	0.781655	0.0196409
GATA3.TSS +3103	-intron (GATA3|AMEX60DD201008149.3, intron 2 of 5)	1.3593	0.0196557	-0.659578	0.258801	0.938529	0.111293	-0.305982	0.60107	0.0196557
SYK.TSS -49	-promoter-TSS (SYK|AMEX60DD201042964.2)	1.97084	0.0196591	0.64642	0.439948	0.206482	0.821151	1.25569	0.132807	0.0196591
IL13RA2.TSS +119953	-intron (IL13RA2|AMEX60DD201037552.1, intron 3 of 9)	1.2705	0.0197112	-0.117065	0.827132	0.0751291	0.898307	0.100657	0.852399	0.0197112
TMEM45B.TSS -43280	-intron (TMEM45B.L, intron 4 of 50)	-1.44328	0.019844	-1.34306	0.0212487	0.785112	0.178446	-1.26529	0.0313162	0.019844
HMGCS2.TSS +1754	-intron (HMGCS2|AMEX60DD102018589.2, intron 1 of 10)	-1.51613	0.0200278	-1.09344	0.064035	0.196547	0.745137	-1.31846	0.0285036	0.0200278
RGS1.TSS -1055	-intron (RGS1|AMEX60DD301018504.1, intron 1 of 4)	2.16983	0.020487	2.65958	0.00286549	3.04642	0.000894081	2.33339	0.00961098	0.000894081
NOD1.TSS +186494		1.46651	0.0208651	0.15877	0.800665	0.553076	0.401227	0.336745	0.594266	0.0208651
BRSK1.TSS +126368	-intron (BRSK1, intron 3 of 78)	1.30447	0.0212162	-0.206573	0.71281	0.0913397	0.880099	-0.0547882	0.922976	0.0212162
TOP2A.TSS +248089	Intergenic	1.27632	0.0213319	-0.183181	0.738311	0.562528	0.330862	-0.123025	0.824832	0.0213319
NQO1.TSS +528	-intron (NQO1, intron 1 of 5)	-0.789621	0.0216726	-0.126032	0.693142	0.143565	0.6672	-0.0995736	0.756865	0.0216726
KIAA0319.TSS +1616	-intron (KIAA0319|AMEX60DD201038567.1, intron 1 of 6)	0.55993	0.0224327	1.07353	5.87e-06	0.954649	9.66e-05	0.965104	5.03e-05	5.87e-06
MSH2.TSS +3032576	Intergenic	-1.09542	0.0226479	-0.896269	0.0473829	-0.726445	0.128943	-0.914485	0.0450257	0.0226479
PHF1.TSS +20	-promoter-TSS (PHF1|AMEX60DD201010798.5)	1.15716	0.0228521	0.326876	0.512799	0.718939	0.166764	0.281677	0.575944	0.0228521
TFEB.TSS -103873	Intergenic	2.16949	0.023423	-1.00821	0.299883	2.00963	0.0366288	-1.40924	0.155734	0.023423
BRCA1.TSS +865667	Intergenic	-1.16998	0.0234868	-0.576387	0.217546	-0.164823	0.738475	-0.49935	0.289666	0.0234868
VTN.TSS +1189	-intron (VTN|AMEX60DD201054883.1, intron 1 of 7)	0.840663	0.0235474	0.60626	0.0924385	0.675985	0.0730294	0.442721	0.2233	0.0235474
TCF7.TSS -36650	-intron (TCF7, intron 16 of 60)	-1.38061	0.0237531	-0.818615	0.107461	-1.15813	0.0495658	-1.00075	0.0565558	0.0237531
IFNG.TSS -343472	Intergenic	-1.01456	0.0241232	-0.554157	0.152139	-0.186489	0.657556	-0.766676	0.0543013	0.0241232
LY86.TSS +338655	-intron (LY86, intron 2 of 20)	1.59866	0.0245025	-0.521862	0.465085	-0.29953	0.693209	-0.316236	0.659772	0.0245025
NRROS.TSS +420	-intron (NRROS, intron 2 of 5)	1.46724	0.0248734	-0.579239	0.379606	0.858105	0.203892	0.141325	0.828896	0.0248734
SIRT4.TSS +54289	Intergenic	0.803484	0.0254525	0.387864	0.266749	0.534326	0.145294	0.339922	0.334438	0.0254525
INPPL1.TSS +242439	-intron (INPPL1|AMEX60DD201049864.1, intron 1 of 27)	1.58289	0.0256826	0.997653	0.149182	1.18129	0.10395	0.897402	0.198847	0.0256826
ITGB8.TSS -6	-promoter-TSS (ITGB8|AMEX60DD201022278.1)	-1.70085	0.026026	-2.99008	6.67e-05	-0.926871	0.217372	-2.77999	0.0002382	6.67e-05
BCL6.TSS -105697	Intergenic	-1.26471	0.027231	-0.478682	0.359969	0.36311	0.500042	-0.0823667	0.875015	0.027231
PIK3R5.TSS +456	-exon (PIK3R5, exon 1 of 39)	-0.862818	0.027573	0.0903844	0.800313	-0.602986	0.122696	-0.21391	0.554713	0.027573
NECTIN1.TSS -549973	Intergenic	-1.38749	0.0280964	-0.0093336	0.986353	-0.394567	0.507081	-0.632321	0.258736	0.0280964
TAX1BP1.TSS +2009836	Intergenic	1.15609	0.0281997	1.06349	0.0320834	1.4048	0.00736177	0.65705	0.195965	0.00736177
ARID5A.TSS +33287	-intron (ARID5A, intron 1 of 3)	1.51494	0.0285425	0.222152	0.745055	1.15991	0.100833	0.49965	0.466534	0.0285425
DMBT1.TSS -105282	Intergenic	-0.707656	0.0288473	-0.612766	0.0447221	-0.241364	0.452074	-0.759902	0.0139863	0.0139863
MEF2C.TSS +216211	-intron (MEF2C|AMEX60DD201042540.10, intron 5 of 9)	0.873974	0.0301416	0.198938	0.608672	-0.27682	0.524232	0.232071	0.554924	0.0301416
UMOD.TSS +248957	Intergenic	0.470205	0.0312452	0.434949	0.0380371	0.331364	0.135608	0.522018	0.0133034	0.0133034
SPN.TSS +26083	-intron (SPN|AMEX60DD201028311.1, intron 1 of 2)	-1.0172	0.0312965	-0.63259	0.137681	-1.0941	0.0226322	-0.404961	0.345058	0.0226322
TAPBP.TSS -43351	Intergenic	2.30485	0.0325822	-1.19902	0.269156	1.04085	0.337325	-1.19979	0.270597	0.0325822
ZDHHC18.TSS +171136	Intergenic	1.12686	0.0335315	0.798782	0.120183	1.10669	0.0388947	0.460571	0.37676	0.0335315
SRC.TSS -54593	-intron (SRC|AMEX60DD201028683.1, intron 1 of 12)	1.59148	0.0337534	1.54568	0.0297526	1.53231	0.0426222	0.655358	0.37417	0.0297526
PAG1.TSS -56142	-intron (PAG1|AMEX60DD201039989.12, intron 3 of 11)	-1.0158	0.0344005	-0.681217	0.0983266	-0.829611	0.0767596	-0.390695	0.346322	0.0344005
CTSC.TSS -68179	Intergenic	-0.859301	0.0344518	-0.847421	0.0309101	-0.585823	0.150069	-0.618915	0.116022	0.0309101
IL17B.TSS -138767	Intergenic	-1.35591	0.0355945	-0.539425	0.327399	-0.347333	0.561977	-0.891264	0.116107	0.0355945
GADD45A.TSS -298012		-1.48775	0.0364863	-1.06789	0.098897	-1.12059	0.111386	-1.01367	0.121022	0.0364863
FYB1.TSS +172150	Intergenic	0.844756	0.036985	0.61218	0.112396	0.560154	0.177259	0.94376	0.014674	0.014674
ADGRB1.TSS +431489		-1.05461	0.0369916	-1.30043	0.00710603	-0.52673	0.29311	-1.13173	0.019896	0.00710603
NQO1.TSS +20215	-intron (NQO1-HOMER2, intron 3 of 25)	1.25375	0.0378192	0.758477	0.193401	1.4873	0.0139007	0.542535	0.359402	0.0139007
ALCAM.TSS +199118	Intergenic	1.32084	0.0380342	-0.862137	0.179823	0.792902	0.223993	-0.44693	0.487539	0.0380342
CHCHD6.TSS -55345	-intron (CHCHD6, intron 30 of 44)	1.31123	0.0381292	-0.270404	0.667084	-0.125582	0.853753	-0.870337	0.182325	0.0381292
TIMELESS.TSS +135109	Intergenic	-1.07055	0.038194	-0.2075	0.670088	-0.442187	0.38597	0.0170861	0.972086	0.038194
CCR7.TSS +20228	-intron (CCR7|AMEX60DD301010137.1, intron 1 of 2)	1.3018	0.038583	1.36511	0.0240251	1.37558	0.0300388	0.834134	0.174707	0.0240251
CEP164.TSS +294034	Intergenic	-1.27907	0.0389804	-1.00998	0.0781915	-0.278606	0.640894	-0.537029	0.349126	0.0389804
IL18R1.TSS +2018	-intron (IL18R1, intron 1 of 2)	1.02411	0.0394593	-0.427133	0.38512	0.697872	0.170674	-0.10565	0.830635	0.0394593
BTK.TSS +69105	-intron (BTK|AMEX60DD201037772.1, intron 1 of 9)	-0.79336	0.0403681	-0.870736	0.0155762	-0.393115	0.304833	-0.565025	0.118149	0.0155762
ILRUN.TSS +268380	Intergenic	0.722342	0.0404512	0.404292	0.22447	0.269236	0.46075	0.387712	0.250607	0.0404512
TNFSF15.TSS -315	none	-0.708069	0.0407974	-0.212439	0.522194	-0.0204134	0.952468	-0.526278	0.115933	0.0407974
AIRE.TSS -37116	Intergenic	1.16179	0.0409815	0.0125889	0.981998	0.892883	0.124032	0.630534	0.256879	0.0409815
C3.TSS +9966		1.3582	0.0420331	0.277335	0.671548	0.419119	0.55209	0.70798	0.279505	0.0420331
ACKR3.TSS +305631	Intergenic	-1.10862	0.0428008	-0.447467	0.373182	0.399119	0.440729	-0.393751	0.436739	0.0428008
MEF2C.TSS -392387	Intergenic	-0.792189	0.0437007	-1.02377	0.00478424	-0.814129	0.0406451	-0.55482	0.126235	0.00478424
IL1R2.TSS -79811	Intergenic	1.09178	0.0445469	1.20953	0.0173037	1.00128	0.0682329	1.13197	0.0278031	0.0173037
APLF.TSS +639370	-intron (APLF|AMEX60DD301035844.1, intron 9 of 9)	-0.602063	0.0445771	-0.694444	0.0147368	-0.502652	0.096277	-0.735304	0.0106159	0.0106159
IL2RG.TSS +181840	-intron (IL2RG, intron 5 of 5)	0.948179	0.0450396	-0.231071	0.618866	0.111182	0.822911	0.139349	0.764767	0.0450396
RPS6KA1.TSS -74942	-intron (RPS6KA1|AMEX60DD201005642.1, intron 2 of 22)	1.1178	0.045365	1.01819	0.0594356	0.724164	0.206065	0.312453	0.57047	0.045365
INPPL1.TSS -82090	Intergenic	1.43454	0.0455362	1.01627	0.145169	1.06433	0.147023	-0.0854261	0.905765	0.0455362
PARP1.TSS -365967	Intergenic	-0.999768	0.046582	-0.536044	0.222217	-0.725151	0.141185	-0.663756	0.139182	0.046582
SIT1.TSS +60582	-intron (SIT1, intron 5 of 5)	1.03869	0.0470369	0.0956811	0.852605	-0.199258	0.718221	-0.0901076	0.862628	0.0470369
CCR7.TSS +17392	-intron (CCR7|AMEX60DD301010137.1, intron 1 of 2)	1.5003	0.0471628	0.858602	0.24154	0.912877	0.243513	1.40027	0.0558538	0.0471628
SRPK1.TSS -93308	Intergenic	-1.21731	0.0481629	0.715315	0.168522	0.303355	0.587307	0.745784	0.153938	0.0481629
ZMPSTE24.TSS -402786	Intergenic	0.84953	0.0482207	0.593835	0.145548	0.471485	0.287311	0.532151	0.198048	0.0482207
CD247.TSS -30464	-intron (CD247|AMEX60DD201047044.1, intron 1 of 8)	-1.2476	0.0484802	-0.699814	0.238857	-0.264624	0.667319	-0.60909	0.307882	0.0484802
TEC.TSS +1087		-1.41396	0.0485248	-0.81315	0.216196	-0.0333241	0.96092	-0.498111	0.45005	0.0485248
IL16.TSS +7849	-intron (IL16|AMEX60DD301003392.1, intron 1 of 17)	0.801853	0.0488303	0.110667	0.779551	0.999307	0.0144287	0.518684	0.190177	0.0144287
AXL.TSS -34277	-intron (AXL|AMEX60DD301024484.1, intron 4 of 19)	-0.767216	0.0494618	0.069877	0.842136	0.121245	0.746255	0.0013373	0.996993	0.0494618
PAG1.TSS +142857	-intron (PAG1|AMEX60DD201039989.12, intron 1 of 11)	-0.988944	0.0495018	0.197683	0.666587	0.266472	0.578909	-0.596642	0.203176	0.0495018
CRTC3.TSS +40945	Intergenic	0.952653	0.0496339	0.164392	0.729221	0.876757	0.0742655	0.270821	0.570992	0.0496339

## Sheet: S4.7 Epigenetics
Supplemental Data Table 4.7: Epigenetics vs Wound from H3K27me3 Cut-and-Run data (Supplemental Fig 5)
gene_names	Annot	ALM_log	ALM_p	SU_log	SU_p	LDN_log	LDN_p	DU_log	DU_p	min p
HDAC7.TSS -294843	Intergenic	-2.48726	0.000385663	-1.54823	0.00343107	0.308647	0.562403	-0.711701	0.170232	0.000385663
SMARCA2.TSS -423932	Intergenic	2.56782	0.00076494	1.81369	0.0152743	1.65977	0.0362685	1.31287	0.084724	0.00076494
SMARCA5.TSS -74094	Intergenic	2.4417	0.00279261	0.13577	0.869404	2.36315	0.00411832	0.0697081	0.933779	0.00279261
BCAS3.TSS -433001	Intergenic	-1.35252	0.00612986	-0.601153	0.16777	-1.32858	0.00751187	-0.42236	0.335957	0.00612986
NAA60.TSS +623039	Intergenic	1.31946	0.00791855	0.537931	0.26681	0.30354	0.563358	0.473994	0.33339	0.00791855
TAF12.TSS -65932	Intergenic	1.04893	0.0092614	0.45794	0.247422	0.649915	0.113591	0.223416	0.575971	0.0092614
STPG4.TSS +393075	Intergenic	1.71523	0.0111055	0.621357	0.346949	0.673118	0.346942	1.24755	0.0579165	0.0111055
SFMBT1.TSS +10078	-intron (SFMBT1|AMEX60DD201023653.1, intron 1 of 20)	-2.31925	0.0139189	-1.32373	0.117933	-0.628754	0.47323	-1.12468	0.186158	0.0139189
PRDM9.TSS +24622		0.981393	0.0171485	-0.158829	0.692069	0.208248	0.63117	0.0723936	0.857881	0.0171485
RIOX2.TSS -37080	Intergenic	-0.883885	0.0225437	-1.24116	0.00051742	-0.453995	0.232695	-0.996605	0.00571223	0.00051742
PHF1.TSS +20	-promoter-TSS (PHF1|AMEX60DD201010798.5)	1.15716	0.0228521	0.326876	0.512799	0.718939	0.166764	0.281677	0.575944	0.0228521
SIRT4.TSS +54289	Intergenic	0.803484	0.0254525	0.387864	0.266749	0.534326	0.145294	0.339922	0.334438	0.0254525
CBX4.TSS -4557		-0.790935	0.025535	0.625008	0.0639507	0.769735	0.0251667	0.560872	0.0974369	0.0251667
KDM5A.TSS -99406	Intergenic	1.26501	0.0270186	0.332478	0.549295	0.217884	0.721212	0.583303	0.29636	0.0270186
PRDM9.TSS -22788		1.48347	0.0306668	-0.87997	0.205401	-0.99188	0.196866	-1.35413	0.0593543	0.0306668
HDAC9.TSS +270870	-intron (HDAC9|AMEX60DD201022301.1, intron 5 of 11)	1.15104	0.0307215	-0.183535	0.726766	0.103371	0.85497	-0.309558	0.562995	0.0307215
RESF1.TSS +5728	-intron (RESF1|AMEX60DD201006868.2, intron 1 of 4)	-0.868641	0.0318937	0.474844	0.218233	0.232477	0.557514	0.374177	0.333601	0.0318937
JADE1.TSS -259875	Intergenic	0.920002	0.03878	0.11065	0.797132	-0.11259	0.813135	0.0668086	0.878486	0.03878
MORC4.TSS +237793	-intron (MONAX_5E034884, intron 2 of 3)	-0.9512	0.0402881	-0.204617	0.622324	0.00687149	0.987613	-0.145759	0.728096	0.0402881
AIRE.TSS -37116	Intergenic	1.16179	0.0409815	0.0125889	0.981998	0.892883	0.124032	0.630534	0.256879	0.0409815
APLF.TSS +639370	-intron (APLF|AMEX60DD301035844.1, intron 9 of 9)	-0.602063	0.0445771	-0.694444	0.0147368	-0.502652	0.096277	-0.735304	0.0106159	0.0106159
PHF20L1.TSS +257101	Intergenic	-0.983335	0.0454781	-1.99518	2.65e-05	-1.04414	0.0367905	-1.60258	0.00076318	2.65e-05

## Sheet: S4.8 FGF Signaling
Supplemental Data Table 4.8: FGF Signaling vs Wound from H3K27me3 Cut-and-Run data (Supplemental Fig 5)
gene_names	Annot	ALM_log	ALM_p	SU_log	SU_p	LDN_log	LDN_p	DU_log	DU_p	min p
NDNF.TSS +6248	-intron (NDNF|AMEX60DD201044914.1, intron 1 of 3)	1.5725	0.00245559	-0.241953	0.641829	0.159653	0.777111	0.127589	0.806773	0.00245559
TBX2.TSS +313216	Intergenic	1.69278	0.00285859	-0.373772	0.513545	0.0227745	0.970553	-0.276172	0.633616	0.00285859
SMOC2.TSS +427		-0.878979	0.00897613	-0.224361	0.488656	-0.50759	0.130896	-0.300409	0.355913	0.00897613
POSTN.TSS -368556	Intergenic	1.82555	0.0103459	-0.606364	0.39944	0.599572	0.416536	-0.0608364	0.93254	0.0103459
FGF8.TSS -943158	Intergenic	-1.28508	0.0134464	-1.09488	0.0219144	-0.557999	0.269416	-0.794827	0.0975983	0.0134464
FLRT3.TSS -797099	Intergenic	0.939943	0.0139028	0.077069	0.835444	0.0829468	0.837087	0.349276	0.348905	0.0139028
NRXN1.TSS +116480	-intron (NRXN1|AMEX60DD201035868.1, intron 3 of 3)	-1.33241	0.0153776	-1.1147	0.0283347	-0.428344	0.420419	-0.656173	0.197041	0.0153776
PTPN11.TSS -35927	Intergenic	-1.79012	0.0163998	-0.52533	0.423992	-0.985896	0.168365	-0.631625	0.341556	0.0163998
CASR.TSS -29843	Intergenic	-1.56086	0.0218976	-1.74824	0.00735727	-1.79088	0.010209	-1.64049	0.0124771	0.00735727
FGF4.TSS +161892	-exon (FGF4, exon 6 of 6)	-1.55595	0.022607	-1.14638	0.0687269	-1.09251	0.105129	-0.938083	0.138452	0.022607
FGFRL1.TSS +251642		0.963797	0.0250983	0.710858	0.0864276	0.799163	0.0679736	0.759342	0.0689973	0.0250983
COL1A1.TSS -747367	Intergenic	0.966026	0.0251663	0.634271	0.131756	0.712619	0.104463	0.297399	0.484595	0.0251663
WNT4.TSS +394401	Intergenic	-1.41185	0.0277155	-0.749888	0.2209	-0.793783	0.211529	-0.820132	0.182912	0.0277155
FLRT3.TSS -487681	Intergenic	1.15737	0.0303426	-0.145591	0.78406	0.32507	0.552244	-0.227155	0.67106	0.0303426
TBX1.TSS -363412	Intergenic	1.43315	0.0356206	-0.0470282	0.94451	-0.284616	0.705026	0.758444	0.257716	0.0356206
FGFR1.TSS +4825	-intron (FGFR1|AMEX60DD201002586.1, intron 1 of 17)	-1.06873	0.036751	-0.514298	0.28661	0.332297	0.500719	-0.666711	0.170854	0.036751
FGF4.TSS -140596	Intergenic	-1.59706	0.0373365	-1.00561	0.146853	-0.133346	0.85279	-0.600834	0.386814	0.0373365
FAT4.TSS +55123	-intron (FAT4|AMEX60DD201044847.1, intron 1 of 16)	1.17537	0.0416951	0.784835	0.157823	1.60731	0.0051033	0.95922	0.0860794	0.0051033
CD44.TSS -899912	Intergenic	4.51798	0.0423504	-1.48139	0.509589	1.64321	0.462414	-1.47675	0.51258	0.0423504
PAX6.TSS +24222	-intron (AMEX60DD301004906.1, intron 2 of 2)	-0.600685	0.0438153	-0.114536	0.688737	0.24429	0.405521	-0.0398565	0.889563	0.0438153
CD44.TSS +131803	-intron (CD44|AMEX60DD301005108.1, intron 1 of 6)	0.902121	0.0465445	1.06703	0.0115998	1.35597	0.00240147	1.18672	0.00533127	0.00240147
FGF10.TSS +1830	-intron (FGF10|AMEX60DD201042028.1, intron 1 of 2)	-0.48719	0.0469644	-0.434735	0.0657743	-0.471591	0.057059	-0.337322	0.155333	0.0469644
FLRT2.TSS +162146	-intron (FLRT2|AMEX60DD201011250.1, intron 2 of 2)	-1.74534	0.0475919	-1.29473	0.10943	0.715143	0.378017	-1.30741	0.109723	0.0475919
FLRT3.TSS -1119133	Intergenic	0.984105	0.0483226	0.432915	0.373455	1.21105	0.0153842	0.387813	0.428991	0.0153842
GCLC.TSS -486682	Intergenic	-0.5721	0.0488163	-0.665911	0.0163855	-0.713933	0.0158666	-0.555458	0.0466642	0.0158666

## Sheet: S4.9 BMP Signaling
Supplemental Data Table 4.9: BMP Signaling vs Wound from H3K27me3 Cut-and-Run data (Supplemental Fig 5)
gene_names	Annot	ALM_log	ALM_p	SU_log	SU_p	LDN_log	LDN_p	DU_log	DU_p	min p
SKOR2.TSS +33117	-intron (SKOR2|AMEX60DD201041708.1, intron 4 of 8)	-1.99229	0.000787152	-1.2327	0.017564	-0.843186	0.12823	-1.47968	0.00527058	0.000787152
SMAD7.TSS +13679	-intron (SMAD7|AMEX60DD201041727.1, intron 2 of 3)	-2.4828	0.00115423	-1.62761	0.0102708	-1.77416	0.0132288	-1.31108	0.0397096	0.00115423
CHRD.TSS +34413	-intron (CHRD|AMEX60DD201001527.1, intron 22 of 22)	1.45496	0.00238619	-0.118445	0.803234	0.254766	0.620194	0.104852	0.826872	0.00238619
HES5.TSS -8352	-intron (AMEX60DD301051346.1, intron 1 of 1)	-1.85006	0.00260672	-0.0739371	0.87609	-0.140718	0.786727	-0.32122	0.507729	0.00260672
ENG.TSS +46878	-intron (ENG|AMEX60DD201050237.1, intron 1 of 14)	1.61846	0.00514141	1.08486	0.0535321	1.20648	0.0419689	1.29463	0.0218078	0.00514141
GATA5.TSS -598838	Intergenic	-1.11563	0.00529096	-0.408668	0.273425	-0.549943	0.16359	-0.504595	0.179864	0.00529096
SMAD6.TSS +1936	-intron (DV515_00006510, intron 1 of 2)	-0.807835	0.00729974	0.162169	0.565863	0.28322	0.332965	-0.0302869	0.91523	0.00729974
BMP5.TSS +399666	-intron (BMP5|AMEX60DD201033480.1, intron 2 of 6)	1.1914	0.00773375	0.179369	0.682007	0.621681	0.1792	0.402131	0.361102	0.00773375
PCSK6.TSS -13216	Intergenic	1.56204	0.00962941	1.89606	0.00116723	1.95609	0.00116177	0.803906	0.176978	0.00116177
LRP2.TSS +170829	-intron (LRP2|AMEX60DD201055628.1, intron 16 of 78)	-1.1849	0.0122529	-0.759211	0.0734055	-0.971032	0.0390708	-0.68869	0.108344	0.0122529
CHRDL2.TSS +48277	-intron (CHRDL2|AMEX60DD201049819.2, intron 1 of 8)	-1.4032	0.0131896	-0.420755	0.371	-0.85277	0.111593	-1.05093	0.0327424	0.0131896
DLX5.TSS +10351		1.77969	0.013791	0.625706	0.377101	2.06717	0.00417086	1.22629	0.0823321	0.00417086
COMP.TSS +866	-intron (COMP, intron 1 of 17)	-1.1218	0.0156961	-0.374252	0.397582	-0.551556	0.230958	-0.436341	0.326436	0.0156961
KCP.TSS +535107	Intergenic	1.07753	0.0157024	-0.462821	0.294748	0.298208	0.524968	0.151533	0.729973	0.0157024
SCUBE3.TSS +69122	-intron (SCUBE3|AMEX60DD301008773.1, intron 1 of 22)	1.40815	0.0159177	0.591102	0.298508	0.850542	0.159201	0.85948	0.132319	0.0159177
TMEM100.TSS +915197		-1.82485	0.0161254	-1.55317	0.0252375	-0.972866	0.183863	-1.55301	0.0271031	0.0161254
SOX9.TSS -1673218		1.18905	0.0172292	1.19462	0.0134509	1.26027	0.0122151	0.752599	0.123946	0.0122151
NFIA.TSS -188863		-1.08474	0.0175756	-0.356664	0.370899	-0.40498	0.354299	-0.491689	0.225836	0.0175756
ACVRL1.TSS +1784	-intron (ACVRL1|AMEX60DD201030013.1, intron 1 of 9)	0.913439	0.018394	1.35935	0.000305433	1.59346	3.44e-05	1.36417	0.000304205	3.44e-05
GATA3.TSS +3103	-intron (GATA3|AMEX60DD201008149.3, intron 2 of 5)	1.3593	0.0196557	-0.659578	0.258801	0.938529	0.111293	-0.305982	0.60107	0.0196557
CHRDL1.TSS +1196	-intron (CHRDL1|AMEX60DD201037123.1, intron 1 of 9)	-0.779059	0.0198189	0.167363	0.604021	0.0855602	0.795684	0.176034	0.58641	0.0198189
ITGA3.TSS -39042	Intergenic	-1.34181	0.0219199	-0.455076	0.383902	-0.340239	0.541668	0.132224	0.799939	0.0219199
SOX11.TSS +695	-exon (SOX11|AMEX60DD201033320.1, exon 1 of 1)	-0.652254	0.0227589	-0.400884	0.149976	-0.147878	0.604315	-0.601198	0.0318178	0.0227589
EGR1.TSS -126719	Intergenic	0.984138	0.0235931	0.640509	0.124055	1.27131	0.00341481	0.881913	0.0350563	0.00341481
MEGF8.TSS -230636	-intron (MONAX_5E043606, intron 23 of 23)	-1.19382	0.0236631	-0.902041	0.070823	-0.610547	0.241772	-0.947961	0.0596884	0.0236631
NFIA.TSS -254155		-1.23451	0.0243679	-1.28445	0.0120263	-0.659248	0.221161	-0.96313	0.0606598	0.0120263
CHRDL1.TSS +815791	Intergenic	-1.22104	0.0245094	-1.16611	0.0225564	-0.836235	0.121504	-1.02097	0.0472851	0.0225564
COL2A1.TSS -660570	Intergenic	-1.46313	0.0248079	-0.698709	0.217535	0.0159984	0.978587	-0.612665	0.284853	0.0248079
GDF10.TSS -273346	Intergenic	-0.846315	0.0248224	-0.0330521	0.92555	-0.0499225	0.892553	-0.408902	0.252988	0.0248224
CHRDL1.TSS +13729	-intron (CHRDL1|AMEX60DD201037123.1, intron 1 of 9)	1.32843	0.0273029	-0.62122	0.304783	-0.112291	0.863423	-0.236796	0.696409	0.0273029
FSTL4.TSS +333679	-intron (FSTL4|AMEX60DD102028911.2, intron 3 of 14)	-1.33305	0.0276031	-0.227791	0.65441	-0.352173	0.529628	-0.614662	0.240052	0.0276031
HES5.TSS +398	-intron (AMEX60DD301051346.1, intron 1 of 1)	1.39377	0.0293447	0.568485	0.370171	0.574981	0.378124	0.595942	0.349096	0.0293447
FSTL4.TSS +409766	-intron (FSTL4|AMEX60DD102028911.2, intron 6 of 14)	1.53197	0.0299613	0.73376	0.286055	1.87444	0.00780597	0.528179	0.44967	0.00780597
FBN1.TSS +467076	-intron (FBN1|AMEX60DD301003755.3, intron 47 of 59)	-1.38878	0.0303129	-1.74942	0.00333798	-0.843234	0.179375	-1.60831	0.00767694	0.00333798
SCUBE3.TSS -20322	Intergenic	2.00589	0.0318527	-1.74015	0.0674933	0.829357	0.380833	-1.57449	0.100062	0.0318527
SKI.TSS -144954	Intergenic	1.46373	0.032193	1.12794	0.0874736	2.0168	0.00292218	1.14904	0.0840958	0.00292218
DKK1.TSS +10379	Intergenic	1.09178	0.0328952	-0.248009	0.623562	-0.362549	0.513199	-0.217379	0.670793	0.0328952
HES5.TSS +3090	-TTS (HES5|AMEX60DD301051347.1)	1.26766	0.0330842	0.797953	0.161985	0.622195	0.31561	0.563721	0.331939	0.0330842
SRC.TSS -54593	-intron (SRC|AMEX60DD201028683.1, intron 1 of 12)	1.59148	0.0337534	1.54568	0.0297526	1.53231	0.0426222	0.655358	0.37417	0.0297526
FSTL4.TSS +503057	-intron (FSTL4|AMEX60DD102028911.2, intron 6 of 14)	0.92589	0.034195	0.456282	0.280226	0.857458	0.0530111	0.615602	0.147539	0.034195
ITGA3.TSS -83497	Intergenic	1.43045	0.038697	1.52247	0.020882	1.32943	0.0580232	1.31908	0.0478922	0.020882
INHBA.TSS -404	none	-0.832318	0.0390371	-0.216533	0.568521	-0.0468956	0.905649	-0.146636	0.700858	0.0390371
TGFB3.TSS -8861	-intron (IFT43|AMEX60DD301011163.1, intron 2 of 9)	-0.995718	0.0392523	-0.0594512	0.888032	-0.232455	0.614292	-0.0871335	0.838484	0.0392523
CHRD.TSS +5838	-intron (CHRD|AMEX60DD201001527.1, intron 2 of 22)	0.562017	0.040752	0.699549	0.00813753	0.609244	0.0279456	0.395106	0.139079	0.00813753
ITGA3.TSS -175432	Intergenic	1.0146	0.0433184	1.29744	0.00625687	1.28257	0.0105367	0.960312	0.0460744	0.00625687
VWC2.TSS -24408	Intergenic	0.979985	0.0497497	0.107713	0.823715	0.123732	0.814828	-0.21864	0.659752	0.0497497

## Sheet: S4.10 PDGF Signaling
Supplemental Data Table 4.10: PDGF Signaling vs Wound
gene_names	Annot	ALM_log	ALM_p	SU_log	SU_p	LDN_log	LDN_p	DU_log	DU_p	min p
ITGB3.TSS +11392	-intron (AB205_0011690, intron 1 of 2)	2.81215	0.00203573	1.62028	0.0724358	1.65322	0.0822058	1.75973	0.0523008	0.00203573
ITGB3.TSS -67985	-intron (ITGB3|AMEX60DD301009754.1, intron 12 of 14)	-2.06132	0.00260236	0.229179	0.663867	0.0148998	0.979192	0.585353	0.268114	0.00260236
ITGB3.TSS -63123	-intron (ITGB3|AMEX60DD301009754.1, intron 13 of 14)	1.5239	0.0029435	1.46601	0.00318488	1.11344	0.033839	1.45395	0.00363032	0.0029435
MTSS2.TSS +15417	-intron (MTSS2|AMEX60DD201015533.1, intron 1 of 17)	1.78535	0.00332391	1.93593	0.000835754	1.10435	0.0802351	1.83412	0.00170899	0.000835754
PLAT.TSS +41607	-intron (PLAT|AMEX60DD201002881.1, intron 6 of 13)	-1.18378	0.00479949	-0.0301552	0.934776	0.284347	0.464149	0.305386	0.40847	0.00479949
PDGFC.TSS +2615	-intron (PDGFC|AMEX60DD301045141.1, intron 1 of 5)	-1.5742	0.00775591	0.52913	0.229638	-0.568262	0.269924	0.133312	0.768216	0.00775591
LRP1.TSS +1094	-intron (LRP1|AMEX60DD201029732.1, intron 1 of 35)	-1.09126	0.010094	-0.180902	0.626447	0.365872	0.349492	-0.188139	0.61686	0.010094
PTPN11.TSS -35927	Intergenic	-1.79012	0.0163998	-0.52533	0.423992	-0.985896	0.168365	-0.631625	0.341556	0.0163998
COL3A1.TSS +1921	-intron (COL3A1, intron 2 of 122)	-0.93749	0.0193581	-0.758995	0.0429194	0.335108	0.383612	-0.764325	0.0435657	0.0193581
CSPG4.TSS +127686	-intron (CSPG4|AMEX60DD201003939.2, intron 1 of 2)	1.09186	0.0242449	0.554767	0.237654	0.572866	0.252362	0.447599	0.346234	0.0242449
COL2A1.TSS -660570	Intergenic	-1.46313	0.0248079	-0.698709	0.217535	0.0159984	0.978587	-0.612665	0.284853	0.0248079
COL1A1.TSS -747367	Intergenic	0.966026	0.0251663	0.634271	0.131756	0.712619	0.104463	0.297399	0.484595	0.0251663
CSPG4.TSS -133266	-intron (CSPG4|AMEX60DD201003939.2, intron 1 of 2)	1.43443	0.0255702	0.76652	0.216801	1.20403	0.0660361	0.801449	0.201371	0.0255702
HAS2.TSS +43452	-intron (HAS2|AMEX60DD301040413.1, intron 2 of 3)	-1.5229	0.0324841	-0.594158	0.330947	-0.295053	0.652937	-0.720229	0.246895	0.0324841
NRP1.TSS -4726	-intron (AMEX60DD201021787.2, intron 1 of 3)	-1.27417	0.0329325	-0.280917	0.60847	-0.0534835	0.9255	-0.479232	0.386939	0.0329325
SRC.TSS -54593	-intron (SRC|AMEX60DD201028683.1, intron 1 of 12)	1.59148	0.0337534	1.54568	0.0297526	1.53231	0.0426222	0.655358	0.37417	0.0297526
RGS14.TSS -58574	-intron (RGS14|AMEX60DD201027889.4, intron 2 of 11)	-1.03227	0.0375572	-0.276054	0.536201	-0.310091	0.518564	-0.102258	0.819863	0.0375572
PDGFB.TSS -3817	Intergenic	-1.48577	0.0419901	-0.187935	0.766943	-0.100698	0.881443	-0.285455	0.656342	0.0419901
COL6A1.TSS -53817	Intergenic	-1.23966	0.042183	0.0698688	0.893198	0.425511	0.439375	-0.688119	0.201611	0.042183
ITGB3.TSS +41379	-intron (ITGB3|AMEX60DD301009754.1, intron 1 of 14)	1.04399	0.0454031	2.11877	1.77e-05	1.1277	0.0319043	1.72456	0.000528927	1.77e-05

[truncated: 7 more sheets: S4.11 VEGF Signaling, S4.12 WNT Signaling, S4.13 ERK-MAPK Signaling, S4.14 NRG-ERBB Signaling, S4.15 RA Signaling, S4.16 RAS Signaling, S4.17 SHH Signaling]
