# Supplementary material for: Development of a model system to study the regulation of patterning competency in regenerating axolotl limbs
Source: Research Square preprint supplement (doi:10.21203/rs.3.rs-3576567/v1), 2023-12-07
Supplement: Supplementary file 4 [file af88d315fbe31ee76231dc9f.xlsx]

## Sheet: S5.1 Anterior-Posterior
Supplemental Data Table 5.1: Anterior-Posterior Patterning Genes from H3K27me3 Cut-and-Run data (Fig 4)
gene_names	Annot	ALM_log	ALM_p	SU_log	SU_p	LDN_log	LDN_p	DU_log	DU_p	type
FGF8 TSS -1152418	Intergenic	0.425778	0.544748	-0.217428	0.749206	-0.449854	0.545087	-1.062	0.133331	CO-DEP
FGF8 TSS -943158	Intergenic	-1.28508	0.0134464	-1.09488	0.0219144	-0.557999	0.269416	-0.794827	0.0975983
FGF8 TSS -601613	Intergenic	-0.677911	0.0806113	-0.575009	0.116771	-0.530257	0.174307	-0.365105	0.321607
FGF8 TSS -402849	Intergenic	-0.782273	0.107476	-0.986095	0.0297501	-0.307627	0.52096	-0.683092	0.134021
FGF8 TSS -184663	Intergenic	0.276472	0.629734	-0.494222	0.370187	0.0655539	0.911053	-0.304226	0.584386	FGF
FGF8 TSS -118397	Intergenic	-0.291789	0.676434	-1.03712	0.120409	-0.303455	0.668426	-0.548033	0.41148
FGF8 TSS +5537	-intron (FGF8|AMEX60DD301052891.1, intron 3 of 4)	-0.296042	0.171602	0.25616	0.22758	0.340019	0.114887	0.229531	0.280667	CO-DEP
ALX4 TSS -56972	Intergenic	0.152497	0.527506	0.709842	0.00268558	0.59134	0.0141594	0.546417	0.0212367
ALX4 TSS -49460	-intron (ALX4|AMEX60DD201005188.1, intron 2 of 3)	-0.757183	0.203018	-0.259906	0.627066	0.0256882	0.964192	-0.298161	0.582424	OTHER
ALX4 TSS -29666	-intron (ALX4|AMEX60DD201005188.1, intron 1 of 3)	0.17532	0.4031	0.518756	0.0106238	0.594698	0.00448032	0.61725	0.0024423
ALX4 TSS -14334	-intron (ALX4|AMEX60DD201005188.1, intron 1 of 3)	-0.00392344	0.988017	0.174729	0.480894	0.0536252	0.83891	-0.0441099	0.860434	OTHER
ALX4 TSS -893	-promoter-TSS (ALX4|AMEX60DD301005188.3)	0.150569	0.687612	0.0767899	0.82807	0.215029	0.569234	0.273861	0.441307
ALX4 TSS -99	-promoter-TSS (ALX4|AMEX60DD301005188.2)	0.272852	0.391148	-0.107091	0.728983	-0.0298319	0.926884	0.100072	0.747066	OTHER
ALX4 TSS +4345	-intron (ALX4|AMEX60DD201005188.1, intron 1 of 3)	-0.139858	0.631769	0.777885	0.00693696	0.765594	0.00840455	0.757405	0.0086369	CO-DEP
ALX4 TSS +7905	-intron (ALX4|AMEX60DD201005188.1, intron 1 of 3)	-0.435224	0.299372	-0.752503	0.0573656	-0.661338	0.124464	-0.72024	0.0723941
ALX4 TSS +16543	-intron (ALX4|AMEX60DD201005188.1, intron 1 of 3)	0.123872	0.79926	-0.728875	0.120463	-0.325311	0.519902	-0.954105	0.0474634	CO-DEP
ALX4 TSS +19293	-intron (ALX4|AMEX60DD201005188.1, intron 1 of 3)	1.03811	0.0325281	0.101316	0.830917	0.513089	0.306286	0.097223	0.839448
ALX4 TSS +21531	-intron (ALX4|AMEX60DD201005188.1, intron 1 of 3)	-1.43977	0.0386275	-1.44526	0.0217964	-0.369321	0.574281	-0.937234	0.13632
ALX4 TSS +22031	-intron (ALX4|AMEX60DD201005188.1, intron 1 of 3)	-0.399122	0.319115	-0.770774	0.0392919	-0.997597	0.0181774	-0.832185	0.0290984
ALX4 TSS +86459	Intergenic	0.0360622	0.938399	-1.00418	0.0285328	-0.72046	0.137799	-0.430787	0.346794	CO-DEP
GREM1 TSS -40119	Intergenic	0.340788	0.48602	0.110295	0.81458	-0.129788	0.797431	0.0119168	0.979994	OTHER
GREM1 TSS -37039	Intergenic	-0.809219	0.0746745	-0.152959	0.715449	0.105653	0.810284	-0.0573304	0.891988	OTHER
GREM1 TSS +3389	-intron (GREM1|AMEX60DD201012132.1, intron 1 of 1)	0.267056	0.305149	1.00312	7.45e-05	0.995142	0.000118316	0.847418	0.000852938
GREM1 TSS +17399	-intron (GREM1|AMEX60DD201012132.1, intron 1 of 1)	0.380564	0.428841	0.136736	0.765178	0.272162	0.578117	0.433556	0.345406
GREM1 TSS +22824	-intron (GREM1|AMEX60DD201012132.1, intron 1 of 1)	-0.164233	0.621528	0.239396	0.443555	0.180647	0.585749	0.0644657	0.838303	CO-DEP
GREM1 TSS +38535	-intron (GREM1|AMEX60DD201012132.1, intron 1 of 1)	-0.0480369	0.903183	-0.00882126	0.981285	0.0418973	0.916204	0.0595715	0.874981	OTHER
GREM1 TSS +148512	Intergenic	0.0234118	0.952036	-0.358414	0.330266	0.00370433	0.992505	-0.0567883	0.877961	FGF
GREM1 TSS +180180	Intergenic	0.188225	0.782863	-0.224225	0.736605	-0.0812424	0.906989	-0.00201509	0.997596	CO-DEP
GREM1 TSS +214198	Intergenic	-0.70798	0.265519	0.230369	0.698575	0.448456	0.466399	0.479734	0.421137	CO-DEP
TBX2 TSS -146478	Intergenic	0.539686	0.404211	1.16435	0.0559466	1.93341	0.00193061	0.796134	0.196637
TBX2 TSS -108637	Intergenic	0.130504	0.734961	1.35877	0.000356069	1.37924	0.000316392	1.21374	0.00144136
TBX2 TSS -100235	Intergenic	-0.379701	0.569305	0.934512	0.133893	1.01597	0.113812	0.381562	0.544726	CO-DEP
TBX2 TSS -95848	Intergenic	-0.039444	0.9111	0.475077	0.15996	0.404009	0.250807	0.306275	0.368257	CO-DEP
TBX2 TSS -61159	Intergenic	-0.0191769	0.957066	0.188022	0.580602	0.00467637	0.989639	-0.115606	0.737041	OTHER
TBX2 TSS -46746	Intergenic	1.10455	0.100045	1.75541	0.00596592	1.26671	0.0603654	1.84991	0.00389802
TBX2 TSS -44939	Intergenic	-0.245247	0.501122	0.815554	0.0155205	0.659893	0.0624526	0.763247	0.0244449	CO-DEP
TBX2 TSS -40970	Intergenic	0.479072	0.285565	1.40776	0.00109329	1.03516	0.0202341	1.23597	0.00431419
TBX2 TSS -10002	Intergenic	0.738958	0.303664	0.677725	0.313494	0.475938	0.517256	0.712764	0.294453
TBX2 TSS -7660	Intergenic	0.301313	0.578812	1.40822	0.00383463	1.23813	0.0170376	0.804809	0.10595
TBX2 TSS -4491	Intergenic	0.322959	0.585158	1.55209	0.00557209	1.29807	0.0250196	1.26866	0.0243087
TBX2 TSS +3867	-exon (CPTBX2, exon 2 of 8)	-0.209764	0.528647	1.24484	0.00014203	1.20845	0.000246747	1.04177	0.00147386	CO-DEP
TBX2 TSS +14990	-intron (CPTBX2, intron 5 of 7)	-0.21935	0.638126	1.05128	0.0212591	0.87225	0.0590361	1.05372	0.0211215	CO-DEP
TBX2 TSS +24174	-intron (CPTBX2, intron 7 of 7)	-0.284719	0.613184	0.461502	0.39096	-0.00270182	0.996177	0.154026	0.776271	FGF
TBX2 TSS +27220	-intron (CPTBX2, intron 7 of 7)	0.187656	0.782336	-0.426062	0.519528	0.11633	0.865752	0.171769	0.79482	OTHER
TBX2 TSS +32623	Intergenic	0.273384	0.657737	0.154428	0.788356	0.555992	0.364645	0.71771	0.211108
TBX2 TSS +78498	Intergenic	-0.0821491	0.858151	0.550646	0.211383	0.615148	0.176072	0.628017	0.155475	CO-DEP
TBX2 TSS +101920	Intergenic	-0.138657	0.775127	0.716353	0.0881661	0.682419	0.134605	0.786365	0.0640776	CO-DEP
TBX2 TSS +130375	Intergenic	-0.654676	0.261313	0.0219112	0.967969	0.775296	0.165868	0.201614	0.712833	CO-DEP
TBX2 TSS +174577	Intergenic	0.336133	0.597987	-0.229982	0.707387	0.580638	0.362966	0.59574	0.327611	OTHER
TBX2 TSS +177083	Intergenic	0.46298	0.28221	0.152775	0.715766	0.323978	0.457929	0.0716912	0.865277
TBX2 TSS +209400	Intergenic	0.492401	0.100996	0.396812	0.169869	0.277425	0.364977	0.322413	0.268727
TBX2 TSS +280137	Intergenic	0.340164	0.575402	0.388899	0.507576	0.309066	0.614879	0.373635	0.526772
TBX2 TSS +313216	Intergenic	1.69278	0.00285859	-0.373772	0.513545	0.0227745	0.970553	-0.276172	0.633616	FGF
TBX2 TSS +314943	Intergenic	0.0254583	0.9513	0.182047	0.646781	-0.00093333	0.998237	0.171986	0.667386	OTHER
TBX3 TSS -167424	Intergenic	0.0954212	0.764954	0.66995	0.0321108	0.819438	0.00983342	0.644915	0.0395559
TBX3 TSS +23396	Intergenic	-0.150844	0.792032	0.696619	0.192419	1.48919	0.00640833	0.797742	0.13729	CO-DEP
TBX3 TSS +48448	Intergenic	-0.586072	0.233819	-0.788556	0.0768063	-0.440274	0.367432	-1.04404	0.0237522
TBX3 TSS +54849	Intergenic	-0.186248	0.424152	0.506859	0.0241594	0.767224	0.000838899	0.607767	0.007009	CO-DEP
MSX1 TSS -357945		-0.097011	0.691913	-0.301659	0.198842	-0.129583	0.601527	-0.00309248	0.989523
MSX1 TSS -11265		-0.110096	0.698932	-0.313389	0.257266	-0.0380487	0.894467	-0.283269	0.3085
MSX1 TSS +1959		-0.240454	0.355514	0.204994	0.422512	0.215466	0.407064	0.226248	0.37696	CO-DEP
MSX1 TSS +12381		-0.991274	0.177275	-0.893572	0.18935	-0.534809	0.460953	-1.18063	0.0896032
MSX1 TSS +16863		-0.384934	0.138941	0.116577	0.633017	-0.124049	0.633591	0.107852	0.661003	OTHER
MSX1 TSS +204229		0.0141596	0.971151	-1.01117	0.00739514	-0.660211	0.110308	-1.45643	0.000226817	CO-DEP
MSX1 TSS +306453		-0.2963	0.556444	-1.08965	0.0242551	0.00101035	0.998397	-0.632307	0.191219	OTHER
MSX1 TSS +325866		-0.621994	0.22379	-0.782974	0.116992	-0.32331	0.527618	-0.592525	0.236784
MSX2 TSS -1423	-intron (AMEX60DD301028757.1, intron 1 of 1)	0.530026	0.351996	-0.483335	0.378644	1.14204	0.0407359	-0.179307	0.74539	FGF
MSX2 TSS +5243	-intron (AMEX60DD301028757.1, intron 1 of 1)	0.348389	0.37171	-0.83365	0.0310667	0.345103	0.379382	-1.04955	0.00719267	FGF
MSX2 TSS +11078	-intron (AMEX60DD301028757.1, intron 1 of 1)	-0.405965	0.443163	-0.924309	0.0617463	0.542904	0.284416	-0.866293	0.0850845	OTHER
MSX2 TSS +16188	-intron (AMEX60DD301028757.1, intron 1 of 1)	0.432857	0.386495	-0.60014	0.22426	0.471457	0.34873	-0.660825	0.184285	OTHER
MSX2 TSS +26981	-intron (AMEX60DD301028757.1, intron 1 of 1)	-0.834712	0.0533675	-0.406577	0.326188	0.711284	0.0899841	-0.234399	0.572556	OTHER
SOX9 TSS -2237031		0.14795	0.786982	-0.343506	0.516655	-0.277813	0.622408	0.149521	0.77771	OTHER
SOX9 TSS -1705653		-0.0631605	0.862657	-0.155099	0.649963	-0.597462	0.117822	-0.158097	0.6478
SOX9 TSS -1673218		1.18905	0.0172292	1.19462	0.0134509	1.26027	0.0122151	0.752599	0.123946
SOX9 TSS -1670649		0.555663	0.300431	0.668738	0.186443	-0.459205	0.425801	0.419108	0.414678	OTHER
SOX9 TSS -1606945		0.441267	0.138619	0.0423096	0.883588	0.0819871	0.788354	0.0388814	0.893789
SOX9 TSS -1527817		-0.360187	0.548945	-1.52802	0.00896617	-0.70967	0.253072	-1.32834	0.0245489
SOX9 TSS -1468349		-0.579731	0.401335	0.160848	0.795479	-0.616664	0.37774	-0.105219	0.867682	BMP
SOX9 TSS -1341881		0.0323177	0.95891	-0.351618	0.552008	0.0582985	0.92668	-0.695865	0.252593	FGF
SOX9 TSS -1300116		-0.453578	0.307674	0.420241	0.320844	0.216969	0.621587	0.406715	0.338683	CO-DEP
SOX9 TSS -646655		0.00557828	0.987536	0.0756037	0.817976	0.0285347	0.936761	0.295818	0.37109
SOX9 TSS -514969		0.175566	0.741621	-0.561507	0.276189	-0.435691	0.432697	-0.540638	0.299892	CO-DEP
SOX9 TSS -278017		0.0633374	0.875716	-0.358142	0.357764	0.00784725	0.984763	-0.0304199	0.937923	FGF
SOX9 TSS -211661		0.753148	0.163543	-0.0350512	0.946289	-0.10759	0.851292	0.141077	0.788109	ADDITIVE
SOX9 TSS -123496		-0.503959	0.356643	-0.726346	0.170114	-0.474814	0.389736	-0.320903	0.544893
SOX9 TSS -9024		0.0186587	0.938146	0.625228	0.00741918	0.571384	0.0169833	0.53824	0.021631
SOX9 TSS -2265		-0.518833	0.235486	-1.44677	0.000468088	-0.774448	0.0843711	-1.23084	0.0032956
SOX9 TSS -573		-0.696352	0.339952	-0.659054	0.349629	0.631581	0.375734	-0.610902	0.388394	OTHER
PTCH1 TSS -402538	Intergenic	0.0203811	0.969829	0.7541	0.115649	0.711585	0.169271	0.482916	0.323198
PTCH1 TSS -394665	Intergenic	-0.302771	0.601987	-0.307741	0.58452	0.162059	0.779381	-0.494358	0.383439	OTHER
PTCH1 TSS -392599	Intergenic	-0.69406	0.353938	-0.379985	0.59163	-0.153891	0.83553	-0.356164	0.6175
PTCH1 TSS -338796	Intergenic	-0.275604	0.616086	-1.36724	0.0103189	-1.03096	0.0770606	-0.852755	0.108981
PTCH1 TSS -183		-0.173629	0.591376	0.739867	0.0191464	0.840863	0.00864878	0.562846	0.0754928	CO-DEP
PTCH1 TSS +3614	-intron (DR999_PMT00930, intron 2 of 23)	-0.1718	0.656039	0.109697	0.763602	0.55358	0.144294	-0.0316451	0.931561	OTHER
PTCH1 TSS +18763	-intron (DR999_PMT00930, intron 2 of 23)	-0.540483	0.19174	0.545635	0.169581	0.407372	0.317659	0.447107	0.26205	CO-DEP
PTCH1 TSS +35623	-intron (DR999_PMT00930, intron 2 of 23)	-0.119992	0.843301	0.38134	0.489628	0.233239	0.69727	0.185603	0.740822	CO-DEP
PTCH1 TSS +39652	-exon (DR999_PMT00930, exon 6 of 24)	-1.36953	0.0400676	-0.88888	0.133171	-1.13361	0.0864271	-0.727275	0.223347
PTCH1 TSS +52545	-intron (DR999_PMT00930, intron 12 of 23)	-0.273164	0.68002	0.359672	0.556299	-0.0873437	0.89528	0.312869	0.612081	FGF
PTCH2 TSS +1723		-0.410714	0.195122	0.581349	0.0582209	0.585828	0.0611913	0.43349	0.159203	CO-DEP
PTCH2 TSS +7516		-0.0776386	0.806624	-0.0545481	0.855298	-0.29546	0.363273	0.0419656	0.889277	OTHER
PTCH2 TSS +37799		-0.0629376	0.931956	0.367703	0.590896	0.169028	0.818532	-0.60668	0.392903	OTHER
GLI1 TSS +590	-exon (GLI1|AMEX60DD201029758.1, exon 1 of 12)	-0.27689	0.499316	0.23401	0.551693	0.260221	0.522785	0.174451	0.658907	CO-DEP
GLI1 TSS +4260	-intron (GLI1|AMEX60DD201029758.1, intron 1 of 11)	-1.45896	0.0257419	-0.290023	0.621374	0.535063	0.375133	-0.610111	0.30553	OTHER
GLI1 TSS +41078	-intron (GLI1|AMEX60DD201029758.1, intron 1 of 11)	-1.24418	0.0115648	-1.10764	0.0109068	-0.8498	0.0763291	-0.994387	0.0242726
GLI1 TSS +76107	-intron (GLI1|AMEX60DD201029758.1, intron 1 of 11)	0.898975	0.164358	0.560307	0.371128	0.020318	0.976118	0.377954	0.550648
GLI1 TSS +87398	-intron (GLI1|AMEX60DD201029758.1, intron 1 of 11)	0.390752	0.483181	-1.1053	0.0447334	0.520021	0.353685	-0.749025	0.175443	FGF
GLI1 TSS +91878	-intron (GLI1|AMEX60DD201029758.1, intron 1 of 11)	-0.408677	0.567888	-0.721756	0.285058	-1.04942	0.164375	-0.775852	0.257754
GLI1 TSS +167046	-intron (GLI1|AMEX60DD201029758.1, intron 1 of 11)	0.177844	0.703458	-0.157514	0.72613	0.416038	0.374301	-0.32502	0.475496	FGF
GLI1 TSS +169601	-intron (GLI1|AMEX60DD201029758.1, intron 1 of 11)	-0.733561	0.145848	-0.117058	0.790467	0.311936	0.507937	-0.473102	0.29682	OTHER
GLI1 TSS +172899	-intron (GLI1|AMEX60DD201029758.1, intron 1 of 11)	0.934158	0.106264	0.318927	0.574761	0.522736	0.375116	-0.263015	0.648435	ADDITIVE
GLI2 TSS -100650	-intron (GLI2|AMEX60DD201056125.3, intron 2 of 13)	-1.53569	0.0122311	-1.27964	0.0183522	-0.80113	0.171198	-1.13938	0.0379522
GLI2 TSS +1793	-intron (GLI2|AMEX60DD201056125.4, intron 1 of 13)	-0.268574	0.323082	0.0473532	0.857525	0.547703	0.0417583	-0.0546724	0.836568	OTHER
GLI2 TSS +53981	-intron (GLI2|AMEX60DD201056125.1, intron 1 of 13)	0.229651	0.740592	-1.5231	0.0278966	-0.898351	0.219349	-1.64558	0.0195602	CO-DEP
GLI2 TSS +59800	-intron (GLI2|AMEX60DD201056125.1, intron 1 of 13)	-0.901172	0.106086	-1.30275	0.0123659	-0.86115	0.126176	-1.8138	0.000844715
GLI2 TSS +77884	-intron (GLI2|AMEX60DD201056125.4, intron 1 of 13)	1.3924	0.0451955	-0.650269	0.351455	0.471828	0.509685	-0.977827	0.169146	CO-DEP
GLI2 TSS +208464	-intron (GLI2|AMEX60DD201056125.3, intron 2 of 13)	1.30155	0.0317696	-0.0698259	0.907104	0.608024	0.335076	0.156372	0.795218	OTHER
HAND2 TSS -9811	Intergenic	-0.483687	0.117061	0.255509	0.37862	0.497181	0.0984172	0.217974	0.455403	CO-DEP
HAND2 TSS +2816	-intron (HAND2|AMEX60DD201045298.1, intron 1 of 1)	0.192207	0.360698	0.7866	0.000143521	0.86802	3.42e-05	0.753796	0.000275709
HAND2 TSS +191861	Intergenic	-0.0277448	0.950936	-0.927428	0.0338979	-0.792088	0.0959164	-0.7727	0.0798825
HAND2 TSS +351970	Intergenic	0.349813	0.158959	0.0461036	0.848081	0.0284955	0.910709	0.351269	0.145406
HAND2 TSS +562551	Intergenic	0.0791142	0.839849	-0.53212	0.157919	-0.558377	0.173099	-0.303583	0.423205	CO-DEP
HAND2 TSS +565557	Intergenic	-0.127701	0.833262	-0.802973	0.166363	-1.23049	0.0622458	-1.04892	0.0778656
HAND2 TSS +625973	Intergenic	-1.78498	0.00133347	-1.85803	0.000277339	-1.24366	0.0223899	-1.29066	0.0113336
HAND2 TSS +677289	Intergenic	-0.384521	0.485356	-0.955868	0.0728524	-0.225744	0.683759	-0.271965	0.608599
HAND2 TSS +699310	Intergenic	-0.127448	0.716772	-0.975843	0.00425198	-0.602422	0.0975468	-0.553152	0.105575
HAND2 TSS +940494	Intergenic	-0.39645	0.316529	-0.971816	0.00965698	-0.931317	0.024696	-0.884237	0.0200798
HAND2 TSS +1123109	Intergenic	-0.563655	0.337523	-0.307152	0.58168	-0.746946	0.213608	-0.538648	0.339525
HAND2 TSS +1421982	Intergenic	-0.784688	0.0803645	-0.487951	0.234	-0.909194	0.0470323	-0.463554	0.263755
SHH TSS +6427	-intron (SHH|AMEX60DD201021621.1, intron 1 of 2)	0.0671841	0.793269	0.791576	0.00174213	0.646916	0.0114376	0.604197	0.0170555
SHH TSS +30763	-intron (SHH|AMEX60DD201021621.1, intron 2 of 2)	0.0569359	0.817597	0.420753	0.0825919	0.556055	0.0240022	0.362893	0.135343
SHH TSS +39776	Intergenic	-0.100929	0.829125	-1.09846	0.0152883	-0.79641	0.10628	-0.566378	0.210144
SHH TSS +110432	Intergenic	0.177456	0.523431	-0.611469	0.0229876	-0.246836	0.390653	-0.349178	0.196617	CO-DEP

## Sheet: S5.2 Dorsal-Ventral
Supplemental Data Table 5.2: Dorsal-Ventral Patterning Genes from H3K27me3 Cut-and-Run data (Fig 4)
gene_names	Annot	ALM_log	ALM_p	SU_log	SU_p	LDN_log	LDN_p	DU_log	DU_p	type
PBX1 TSS -535392	Intergenic	-0.334931	0.492091	-1.57252	0.000874512	-0.716228	0.156626	-1.03801	0.0272837
PBX1 TSS +45658	-intron (PBX3|AMEX60DD201050513.1, intron 5 of 7)	-0.239393	0.69292	-0.0510656	0.928355	0.266312	0.6566	0.0253591	0.964665	BMP
PBX1 TSS +79129	-intron (PBX3|AMEX60DD201050513.1, intron 2 of 7)	0.383344	0.478676	0.398335	0.436206	1.18345	0.0254017	0.194735	0.707534
PBX1 TSS +82323	-intron (PBX3|AMEX60DD201050513.1, intron 2 of 7)	-0.271739	0.41851	-0.168955	0.594065	-0.00850609	0.9798	0.0334282	0.91644	ADDITIVE
PBX1 TSS +133209	-intron (PBX3|AMEX60DD201050513.1, intron 2 of 7)	-0.0706829	0.911148	-0.187076	0.76193	0.0265876	0.966725	0.187694	0.761414	BMP
PBX1 TSS +160786	-intron (PBX3|AMEX60DD201050513.1, intron 2 of 7)	0.224426	0.638934	-0.0817271	0.855019	-0.220839	0.656546	-0.170181	0.708884
PBX3 TSS +6419	-intron (PBX3|AMEX60DD201050513.1, intron 2 of 7)	-0.182943	0.476929	0.73665	0.0035209	0.725529	0.00451528	0.660957	0.00895156	CO-DEP
PBX3 TSS +30352	-intron (PBX3|AMEX60DD201050513.1, intron 2 of 7)	-0.623673	0.379059	-0.664966	0.32379	0.621893	0.364874	-0.824333	0.227145	OTHER
PBX3 TSS +42220	-intron (PBX3|AMEX60DD201050513.1, intron 2 of 7)	-0.0325897	0.958658	-0.271807	0.649591	-0.511327	0.433828	-0.215451	0.72124
PBX3 TSS +84931	-intron (PBX3|AMEX60DD201050513.1, intron 2 of 7)	-0.18931	0.738464	0.232291	0.653822	0.21907	0.695177	0.217688	0.677809	ADDITIVE
PBX3 TSS +116037	-intron (PBX3|AMEX60DD201050513.1, intron 2 of 7)	0.238904	0.544328	-0.0370755	0.92331	0.381234	0.335628	0.00281167	0.994202	OTHER
PBX3 TSS +158254	-intron (PBX3|AMEX60DD201050513.1, intron 2 of 7)	0.428077	0.248075	0.614776	0.0810173	0.509462	0.172764	0.282592	0.428919
FZD5 TSS +4664	-exon (FZD5|AMEX60DD201055073.1, exon 1 of 1)	0.129963	0.640874	0.761012	0.00559859	0.859557	0.0019568	0.612872	0.0259483
FZD5 TSS +61886	Intergenic	0.331437	0.660419	0.718486	0.31887	0.338585	0.657163	0.979481	0.175233
FZD5 TSS +69254	Intergenic	0.435469	0.415496	-0.0381861	0.940157	0.0125613	0.981905	0.405366	0.425795	OTHER
FZD5 TSS +104384	Intergenic	-0.667355	0.159728	0.0381537	0.932998	-0.203416	0.666798	-0.16711	0.714442	OTHER
FZD5 TSS +145310	Intergenic	-0.363028	0.50647	-0.411617	0.430393	-0.499936	0.369216	0.00379862	0.9942	ADDITIVE
RSPO2 TSS +1468	-intron (RSPO2|AMEX60DD301040292.1, intron 2 of 5)	-0.270635	0.30901	0.143869	0.580584	0.346194	0.191243	0.135094	0.604803	CO-DEP
RSPO2 TSS +8476	-intron (RSPO2|AMEX60DD301040292.1, intron 2 of 5)	0.132097	0.737065	-0.109914	0.771982	-0.138937	0.729956	-0.179232	0.639639	CO-DEP
RSPO2 TSS +17682	-intron (RSPO2|AMEX60DD301040292.1, intron 2 of 5)	-0.340383	0.395456	-0.50029	0.197059	-0.294351	0.466452	-0.740961	0.0586375
RSPO2 TSS +166237	-intron (RSPO2|AMEX60DD301040292.1, intron 2 of 5)	-0.238551	0.631033	-1.03205	0.0293538	-0.838203	0.108801	-1.3656	0.00540959
RSPO2 TSS +218338	-intron (RSPO2|AMEX60DD301040292.1, intron 2 of 5)	-1.0307	0.0225126	-1.22818	0.00364151	-1.33517	0.00423806	-1.08734	0.0107726
RSPO2 TSS +281259	-intron (RSPO2|AMEX60DD301040292.1, intron 3 of 5)	-0.305286	0.523499	-0.748124	0.106275	-0.560843	0.251526	-0.496085	0.286023
RSPO2 TSS +360091	-intron (RSPO2|AMEX60DD301040292.1, intron 5 of 5)	0.144477	0.765917	-0.565494	0.219715	0.171387	0.72623	-0.328677	0.479281	FGF
RSPO2 TSS +877910	Intergenic	-0.496447	0.353947	-1.47317	0.00390505	-0.605978	0.26616	-0.798377	0.113912
RSPO2 TSS +1062081	Intergenic	-1.12009	0.075464	-0.936192	0.109459	-1.13476	0.0758821	-0.615899	0.29397
RSPO2 TSS +1163496	Intergenic	0.508664	0.134757	-0.496188	0.131669	-0.30173	0.402905	-0.465475	0.164053	CO-DEP
RSPO2 TSS +1264449	Intergenic	0.428997	0.445814	-1.70337	0.00285261	-0.845317	0.165424	-0.953442	0.0908013	CO-DEP
WNT3A.TSS -495034	Intergenic	0.898179	0.325345	-1.38086	0.130603	0.468412	0.608175	-1.63685	0.0733072	FGF
WNT3A.TSS -285247	Intergenic	-0.378136	0.455791	-1.37184	0.00461003	-1.41055	0.0109563	-1.89424	0.000233232
WNT3A.TSS -2596	Intergenic	0.990059	0.0994967	0.202403	0.727356	-0.426373	0.518461	0.213573	0.716563	OTHER
WNT3A.TSS -324	-promoter-TSS (WNT3A|AMEX60DD201020503.1)	1.16175	0.0939042	-1.23594	0.0793026	0.489006	0.493122	-1.41114	0.0504419	FGF
WNT3A.TSS +2039	-intron (WNT3A|AMEX60DD201020503.1, intron 1 of 3)	0.659949	0.288933	-0.796253	0.196401	0.483298	0.444936	-0.499287	0.420071	FGF
WNT3A.TSS +4202	-intron (WNT3A|AMEX60DD201020503.1, intron 1 of 3)	1.01817	0.0674912	-0.799703	0.151345	1.25655	0.0243451	-0.556147	0.322178	FGF

## Sheet: S5.3 Proximal-Distal
Supplemental Data Table 5.3: Proximal-Distal Patterning Genes from H3K27me3 Cut-and-Run data (Fig 4)
gene_names	Annot	ALM_log	ALM_p	SU_log	SU_p	LDN_log	LDN_p	DU_log	DU_p	type
EMX2 TSS -399016	Intergenic	1.90236	0.0422846	-0.776593	0.413288	1.28413	0.176986	0.269137	0.774738	OTHER
EMX2 TSS -367277	Intergenic	1.04752	0.0324363	0.227528	0.633887	0.0681289	0.895209	-0.257877	0.598171	ADDITIVE
EMX2 TSS -187753	Intergenic	0.402217	0.445331	-0.641799	0.217458	-0.900756	0.105172	-0.785681	0.134923	CO-DEP
EMX2 TSS -184689	Intergenic	0.622202	0.0875218	0.447785	0.205217	0.212891	0.568428	0.177225	0.619662
EMX2 TSS -127091	Intergenic	-0.469724	0.180442	0.356191	0.275767	-0.0317275	0.927335	-0.276127	0.406384	OTHER
EMX2 TSS -119649	Intergenic	-0.183229	0.554332	0.500244	0.0969307	0.295612	0.338789	-0.113634	0.708143	OTHER
EMX2 TSS -77559	Intergenic	-0.00110122	0.998729	-0.591077	0.376194	-0.635243	0.378807	-1.87356	0.00820804
EMX2 TSS -72431	Intergenic	-0.436549	0.280615	0.0143112	0.969898	0.283682	0.474784	-0.985531	0.0118771	OTHER
EMX2 TSS -68681	Intergenic	1.25077	0.0362024	-0.235468	0.691404	0.930861	0.125476	-0.258915	0.665911	FGF
EMX2 TSS +5822	-intron (EMX2|AMEX60DD201053236.1, intron 2 of 2)	-0.440384	0.501181	-1.49875	0.0202494	-0.121568	0.852786	-1.41813	0.0291136
EMX2 TSS +8458	-intron (EMX2|AMEX60DD201053236.1, intron 2 of 2)	-1.74981	0.00913489	-0.98985	0.087306	0.884256	0.129434	-1.23365	0.0374656	OTHER
EMX2 TSS +26021	Intergenic	-0.922591	0.217652	-0.640868	0.348594	0.453343	0.520397	-1.01611	0.147238	OTHER
EMX2 TSS +199114	Intergenic	0.030378	0.963609	0.13894	0.822363	0.141705	0.832251	-0.0675294	0.914625	ADDITIVE
EMX2 TSS +202184	Intergenic	0.219812	0.516602	-0.0950792	0.771362	-0.122247	0.725175	-0.182141	0.581485	CO-DEP
EMX2 TSS +222434	Intergenic	-1.44574	0.00323553	-1.068	0.0211544	-0.932666	0.0552151	-1.11487	0.0169822
EMX2 TSS +324459	Intergenic	-0.316096	0.719942	0.704826	0.385158	0.99017	0.24011	0.621373	0.447368	CO-DEP
EMX2 TSS +329775	Intergenic	-1.00757	0.110096	-1.13936	0.0458461	-0.523252	0.393896	-1.33961	0.0227403
EMX2 TSS +475395	Intergenic	-0.333839	0.496301	-1.50899	0.00161403	-1.84902	0.000765838	-1.8108	0.00024878
HOXA13.TSS -410120	Intergenic	-0.759275	0.122997	-0.682218	0.15057	-0.913895	0.067967	-0.0818022	0.863015
HOXA13.TSS -299324	Intergenic	0.690806	0.12228	-0.263568	0.545603	0.590399	0.193339	-0.291465	0.509498	FGF
HOXA13.TSS -3211	Intergenic	0.157063	0.628758	1.28801	5.08e-05	1.34239	2.97e-05	1.15931	0.000272369
HOXA13.TSS +4522	Intergenic	0.729067	0.133349	1.09704	0.0198887	0.637966	0.194285	0.968268	0.0408482
HOXD13.TSS -2260	Intergenic	0.0714213	0.751578	0.269034	0.216059	0.334739	0.138627	0.160275	0.464107
HOXD13.TSS +2654	-intron (HOXD13|AMEX60DD201055612.1, intron 1 of 1)	-0.756473	0.208707	-1.1979	0.0307507	-0.736758	0.223659	-0.381282	0.485554
HOXD13.TSS +7514	-intron (HOXD13|AMEX60DD201055612.1, intron 1 of 1)	-0.355908	0.31126	0.0828111	0.808867	0.130637	0.709352	0.246439	0.472478	CO-DEP
MEIS1.TSS +309379	Intergenic	-0.0505055	0.919317	-0.0763711	0.870416	0.465401	0.34422	0.137815	0.769771	BMP
MEIS1.TSS +398533	Intergenic	-0.368732	0.431937	-0.439306	0.308524	-0.515917	0.280792	-0.452296	0.302234
MEIS1.TSS +485463	Intergenic	-0.344639	0.475232	-0.865666	0.0543501	0.849184	0.0626761	-0.579632	0.200712	other
MEIS1.TSS +487648	Intergenic	-0.662272	0.265701	-1.93908	0.000923666	-0.751332	0.213692	-2.78516	6.29e-06	other
PROD1.TSS -13072	Intergenic	0.342547	0.408358	-0.608469	0.131742	-0.309924	0.473578	0.0526935	0.89573	other
PROD1.TSS +55814	-intron (PROD1, intron 2 of 2)	-0.0536791	0.914477	0.00456598	0.992398	0.524766	0.289475	-0.705534	0.149493	other
PROD1.TSS +445810	Intergenic	-0.136596	0.779499	-0.181196	0.694971	-0.044111	0.928543	-0.0169359	0.970943
SHOX2.TSS +3148	-intron (LOC115533677, intron 1 of 4)	0.0768049	0.794086	0.911444	0.00108462	0.711382	0.0144455	0.766558	0.00631048
SHOX2.TSS +5737	-TTS (SHOX2|AMEX60DD301001828.7)	0.00445043	0.987032	0.861531	0.00151253	0.810363	0.00300827	0.767235	0.00476028
SHOX2.TSS +81175	Intergenic	0.37004	0.540882	0.648628	0.249979	0.355717	0.561185	0.413905	0.46979
SHOX2.TSS +309441	Intergenic	-0.0425905	0.941173	-0.415262	0.457064	0.0216331	0.97036	-0.250195	0.655751	other
SHOX2.TSS +404192	Intergenic	1.58492	0.0316709	-0.139277	0.850057	0.718749	0.341893	-0.163207	0.826062	FGF

## Sheet: Excluded patterning genes
Genes not included in Fig 4 analysis because of low or no rlevent hits
Genes	Why not included
WNT7A	no hits
LMX1B	no hits
SHOX1	no hits
SHOX3	no hits
TIG1	no hits
MEIS2	no hits
BMP2	no hits
WNT5A	no hits
ERBB2	no hits
AG1	no hits
HOXA9	no hits
FGF2	no hits
HOXD10	1 hit
ERBB1	1 hit
SFRP2	1 hit
GLI3	2 hits
SMO	2 hits
PBX2	2 hits
