# Supplementary material for: Development of a model system to study the regulation of patterning competency in regenerating axolotl limbs
Source: Research Square preprint supplement (doi:10.21203/rs.3.rs-3576567/v1), 2023-12-07
Supplement: Supplementary file 5 [file d767a6392126cfe279867241.xlsx]

## Sheet: Fig 2a
	ALX4				SHH				HAND2				HOXD10				FGF8
	Wounds		ALM		Wounds		ALM		Wounds		ALM		Wounds		ALM		Wounds		ALM
Bio Replicate	D13DMSO	D13RA	D14 DMSO	D14 RA	D13DMSO	D13RA	D14 DMSO	D14 RA	D13DMSO	D13RA	D14 DMSO	D14 RA	D13DMSO	D13RA	D14 DMSO	D14 RA	D13DMSO	D13RA	D14 DMSO	D14 RA
1	2.31778	1.91628	6.6575	3.90278	0.0350995	0.0489721	0.0483597	2.31492	3.08631	3.5761	8.7658	13.3817	4.87949	1.84101	22.4735	19.0852	1.6504	1.50145	11.0489	19.7703
2	2.00137	2.24339	15.1483	5.29633	0.0473365	0.0184968	0.113666	4.02405	1.53783	4.76606	10.8703	19.7408	3.41178	1.56945	32.8917	40.1894	1.5746	1.52161	8.128	22.6511
3	1.96781	2.72257	10.0585	4.17822	0.118816	0.112779	0.0745332	4.4882	2.2911	2.57507	10.9432	13.6536	6.80019	2.53056	47.9835	52.3542	2.32064	1.95915	7.52222	30.5941
4	1.41476	1.94848	13.1166	5.71356	0.0910392	0.0062188			1.81329	2.73008			3.88214	2.86861			1.31835	1.57119
5	1.6278	2.10642			0.0304104	0.0141809			1.72349	2.00772			2.94451	1.45176			1.92585	0.839471
Average	1.8659	2.18743	11.2452	4.77272	0.0645402	0.0401295	0.0788528	3.60906	2.0904	3.13101	10.1931	15.592	4.38362	2.05228	34.4496	37.2096	1.75797	1.47857	8.89971	24.3385
Stdev	0.351123	0.326606	3.70548	0.869784	0.0386509	0.0437246	0.0328666	1.14453	0.622265	1.07274	1.23661	3.59549	1.52911	0.619176	12.8262	16.8335	0.381853	0.403224	1.88574	5.60573
SE	0.157027	0.146063	1.85274	0.434892	0.0172852	0.0195542	0.0189755	0.660796	0.278285	0.479745	0.713958	2.07586	0.683838	0.276904	7.40518	9.71881	0.17077	0.180327	1.08873	3.23647
RA wound vs. RA CALM										DMSO wound vs. DMSO CALM
	Below threshold?	P value	Mean of W - RA	Mean of ALM - RA	Difference	SE of difference	t ratio	df			Below threshold?	P value	Mean of W - DMSO	Mean of ALM - DMSO	Difference	SE of difference	t ratio	df
ALX4	Yes	0.000441	2.187	4.773	-2.585	0.4163	6.21	7		ALX4	Yes	0.000713	1.866	11.25	-9.379	1.637	5.73	7
SHH	Yes	0.000316	0.04013	3.609	-3.569	0.4833	7.385	6		SHH	No	0.613698	0.06454	0.07885	-0.01431	0.02689	0.5322	6
HAND2	Yes	0.000275	3.131	15.59	-12.46	1.645	7.573	6		HAND2	Yes	1.5e-05	2.09	10.19	-8.103	0.64	12.66	6
FGF8	Yes	7.2e-05	1.479	24.34	-22.86	2.376	9.622	6		FGF8	Yes	0.000133	1.758	8.9	-7.142	0.8271	8.635	6
HOXD10	Yes	0.002586	2.052	37.21	-35.16	7.107	4.947	6		HOXD10	Yes	0.00154	4.384	34.45	-30.07	5.484	5.482	6
RA vs. DMSO Wound										RA vs. DMSO CALM
	Below threshold?	P value	Mean of W - DMSO	Mean of W - RA	Difference	SE of difference	t ratio	df			Below threshold?	P value	Mean of ALM - DMSO	Mean of ALM - RA	Difference	SE of difference	t ratio	df
ALX4	No	0.172191	1.866	2.187	-0.3215	0.2145	1.499	8		ALX4	Yes	0.036195	11.25	4.773	6.473	1.903	3.401	3.33
SHH	No	0.376996	0.06454	0.04013	0.02441	0.0261	0.9353	8		SHH	Yes	0.033206	0.07885	3.609	-3.53	0.6611	5.34	2.003
HAND2	No	0.097465	2.09	3.131	-1.041	0.5546	1.876	8		HAND2	No	0.109291	10.19	15.59	-5.399	2.195	2.459	2.467
FGF8	No	0.293213	1.758	1.479	0.2794	0.2484	1.125	8		FGF8	Yes	0.030878	8.9	24.34	-15.44	3.415	4.521	2.447
HOXD10	Yes	0.013396	4.384	2.052	2.331	0.7378	3.16	8		HOXD10	No	0.833099	34.45	37.21	-2.76	12.22	0.2259	3.737
Test details
Test name	Unpaired t test with Welch correction
Variance assumption	Individual variance for each group
Multiple comparisons	Set P value threshold
Method	No correction for multiple comparisons
Alpha	0.05
Number of tests performed	5
Number of rows omitted	0

## Sheet: Fig 2c
Day	6		7		8
Bio replicate	DMSO	RA	DMSO	RA	DMSO	RA
1	0.857483	0.0685866	6.51542	0.489743	25.0233	0.821077
2	2.26285	0.0536214	0.596106	0.0230576	31.0183	0.20967
3	2.73985	0.0230576	10.2197	1.90502	67.6831	0.620977
4	1.41697	0.0230576		0.0230576	0.484454	0.524743
5						3.06031
6						0.367078
Average	1.81929	0.0420808	5.77709	0.610219	31.0523	0.933976
Stdev	0.842835	0.0227999	4.85412	0.890794	27.7643	1.06259
SE	0.421418	0.0114	2.80253	0.445397	13.8821	0.4338
Unpaired t-tests
	Below threshold?	P value	Mean of DMSO	Mean of RA	Difference	SE of difference	t ratio	df
6	Yes	0.005588	1.819	0.04208	1.777	0.4216	4.216	6
7	No	0.084251	5.777	0.6102	5.167	2.403	2.15	5
8	Yes	0.025411	31.05	0.934	30.12	10.99	2.741	8
Test details
Test name	Unpaired t test
Variance assumption	Individual variance for each row
Multiple comparisons	Set P value threshold
Method	No correction for multiple comparisons
Alpha	0.05
Number of tests performed	3
Number of rows omitted	0

## Sheet: Fig 2f
MEIS2	Mature		Early Bud		Apical LB		Basal LB			SHH	Mature		Early Bud		Apical LB		Basal LB
Bio Replicate	RA	DMSO	RA	DMSO	RA	DMSO	RA	DMSO		Bio Replicate	RA	DMSO	RA	DMSO	RA	DMSO	RA	DMSO
1	4.48272	1.5722	4.23381	2.35902	2.48714	1.27061	2.67383	2.1048		1	5.69184	1.72782	1.642	1.17378	0.724703	48.6244	4.44527	10.8102
2	3.44796	3.69429	3.46818	2.53566	3.39318	1.41833	6.74367	1.81006		2	2.65678	2.27905	0.311022	2.38485	0.649822	28.9221	5.37277	0.338877
3	5.15926	2.94558	5.82185	1.52427	4.11239	0.899239	2.39938	1.70696		3	4.73342	24.8299	0.169358	1.50814	1.08263	4.52715	0.275224	2.85822
4	6.24285	1.39756	2.46409	2.5158	5.24609	0.996925	5.1965	1.48499		4	1.63893	0.223113	0.478541	2.61602	1.45676	36.5634	0.104729	7.33315
5		1.40392		3.05859	4.57153	0.996925	5.43264	1.66934		5					0.717608	32.447	0.741176	2.06583
6						1.3124	6.84793	1.61353		6						26.9495	1.9906	6.22984
7										7						40.2789
Average	4.8332	2.20271	3.99698	2.39867	3.96207	1.14907	4.88232	1.73161		Average	3.68024	7.26496	0.650231	1.92069	0.926304	31.1875	2.15496	4.93936
Stdev	1.17405	1.056	1.41605	0.555457	1.06558	0.211028	1.93764	0.211981		Stdev	1.85922	11.7421	0.67315	0.689686	0.341488	13.8507	2.25222	3.88885
SE	0.587024	0.472257	0.708027	0.248408	0.476541	0.0861516	0.791038	0.0865409		SE	0.929612	5.87106	0.336575	0.344843	0.152718	5.23508	0.919465	1.58761
ALX4	Mature		Early Bud		Apical LB		Basal LB			FGF8	Mature		Early Bud		Apical LB		Basal LB
Bio Replicate	RA	DMSO	RA	DMSO	RA	DMSO	RA	DMSO		Bio Replicate	RA	DMSO	RA	DMSO	RA	DMSO	RA	DMSO
1	4.95932	3.29966	3.19124	2.09357	6.96275	3.16553	3.40835	4.32754		1	6.68689	4.20371	7.30648	9.9472	73.0836	166.968	4.83506	20.4937
2	11.5049	4.84946	1.90409	3.02708	1.87635	1.97288	1.424	1.78616		2	7.34449	5.20159	4.22955	16.473	64.7949	120.666	5.70847	5.93312
3	9.49501	1.56947	1.80317	3.93497	1.98482	2.0127	2.00377	3.04682		3	14.1586	42.3244	4.44454	17.0774	47.4165	55.8234	3.28626	21.8342
4	3.66024	2.17391	2.32062	2.82739	2.15826	2.13345	3.17279	3.00063		4	7.179	2.84806	2.84748	13.4346	60.9543	141.601	4.01871	102.405
5				2.27971	3.43106	2.8933	2.26764	2.97744		5		3.71361			52.1239	157.562	14.6875	14.1201
6						2.06229	2.09181	4.92864		6					82.6726	123.508		30.756
7						1.96181				7						139.206
Average	7.40487	2.97312	2.30478	2.83254	3.28265	2.31456	2.39473	3.34454		Average	8.84226	11.6583	4.70701	14.2331	63.5076	129.334	6.5072	32.5903
Stdev	3.70505	1.44179	0.631988	0.725418	2.15008	0.497968	0.753113	1.11767		Stdev	3.55524	17.164	1.87189	3.2718	13.0819	36.4554	4.66149	35.1886
SE	1.85252	0.720894	0.315994	0.324417	0.961546	0.188214	0.307457	0.456285		SE	1.77762	7.67596	0.935947	1.6359	5.34068	13.7788	2.08468	14.3657
MEIS2 Upaired t-tests										SHH Upaired t-tests
	Below threshold?	P value	Mean of RA	Mean of DMSO	Difference	SE of difference	t ratio	df			Below threshold?	P value	Mean of RA	Mean of DMSO	Difference	SE of difference	t ratio	df
Mat.	Yes	0.009487	4.833	2.203	2.63	0.7434	3.539	7		Mat.	No	0.587131	3.68	7.265	-3.585	5.944	0.6031	3.15
EB	No	0.051751	3.997	2.399	1.598	0.6827	2.341	7		EB	Yes	0.038742	0.6502	1.921	-1.27	0.4819	2.637	5.996
Ap. LB	Yes	0.000128	3.962	1.149	2.813	0.4406	6.385	9		Ap. LB	Yes	0.001167	0.9263	31.19	-30.26	5.237	5.778	6.01
Ba. LB	Yes	0.002689	4.882	1.732	3.151	0.7958	3.959	10		Ba. LB	No	0.167504	2.155	4.939	-2.784	1.835	1.518	8.015
ALX4 Upaired t-tests										SHH Upaired t-tests
	Below threshold?	P value	Mean of RA	Mean of DMSO	Difference	SE of difference	t ratio	df			Below threshold?	P value	Mean of RA	Mean of DMSO	Difference	SE of difference	t ratio	df
Mat.	No	0.067319	7.405	2.973	4.432	1.988	2.229	6		Mat.	No	0.737199	8.842	11.66	-2.816	7.879	0.3574	4.424
EB	No	0.289729	2.305	2.833	-0.5278	0.4608	1.145	7		EB	Yes	0.00446	4.707	14.23	-9.526	1.885	5.054	4.774
Ap. LB	No	0.269252	3.283	2.315	0.9681	0.8276	1.17	10		Ap. LB	Yes	0.002316	63.51	129.3	-65.83	14.78	4.454	7.729
Ba. LB	No	0.115002	2.395	3.345	-0.9498	0.5502	1.726	10		Ba. LB	No	0.129936	6.507	32.59	-26.08	14.52	1.797	5.21
Test details
Test name	Unpaired t test with Welch correction
Variance assumption	Individual variance for each group
Multiple comparisons	Set P value threshold
Method	No correction for multiple comparisons
Alpha	0.05
Number of tests performed	4
Number of rows omitted	0

## Sheet: Fig 2g
	Sham		Denerve
Bio Replicate	RA	DMSO	RA	DMSO
1	0.239732	2.11304	0.664173	0.454327
2	0.341892	0.343486	0.082735	2.61802
3	0.138305	3.66016	0.11214	3.16646
4	0.0201728	3.78156	0.418258	1.02919
5	0.144572	5.77912	0.215626	1.10803
Average	0.176935	3.13547	0.298587	1.6752
Stdev	0.120694	2.03237	0.243008	1.15567
SE	0.053976	0.908904	0.108676	0.516832
Unpaired t-tests
	Below threshold?	P value	Mean of RA	Mean of DMSO	Difference	SE of difference	t ratio	df
I	Yes	0.011713	0.1769	3.135	-2.959	0.9105	3.249	8
D	Yes	0.031297	0.2986	1.675	-1.377	0.5281	2.607	8
Test details
Test name	Unpaired t test
Variance assumption	Individual variance for each row
Multiple comparisons	Set P value threshold
Method	No correction for multiple comparisons
Alpha	0.05
Number of tests performed	2
Number of rows omitted	0

## Sheet: Fig 2h
From Supplemental Data Table 1
Figure 2H: ND-P's
Manipulation	Total surgeries performed	Survived & Formed Blastema	Raw Numbers					Percentages
			No Elements	Single Element	Multiple Symmetrical	Single Limb	2+ Limbs	No Elements	Single Element	Multiple Symmetrical	Single Limb	2+ Limbs
Sham + RA	20	15	1	1	0	11	2	0.0666667	0.0666667	0	0.733333	0.133333
Sham + DMSO	20	20	7	13	0	0	0	0.35	0.65	0	0	0
Denerve. + RA	20	15	3	3	1	4	4	0.2	0.2	0.0666667	0.266667	0.266667
Combined Single Element and Multiple Symmetrical into Simple Elements to Run Chi-squared test
	No Elements	Simple Elements	Single Limb	2+ Limbs
Sham + RA	7	7	73	13
Denerve. + RA	20	27	27	27
P value and statistical significance
Test	Chi-square
Chi-square, df	44.08, 3
P value	<0.0001
P value summary	****
One- or two-sided	NA
Statistically significant (P < 0.05)?	Yes
Data analyzed
Number of rows	2
Number of columns	4

## Sheet: SFig 1b
	timepoints at which SHH undetectable by QRT-PCR					Detectable
Day	1	2	3	4	5	6	7
	0	0	0	0	0	1.62925	2.5307
	0	0	0	0	0	1.74614	3.03021
	0	0	0	0	0	0.691357	1.58877
Average	0	0	0	0	0	1.35558	2.38323
Stdev	0	0	0	0	0	0.578195	0.731947
SE	0	0	0	0	0	0.333821	0.42259
Tukey Multiple Comparisons Test Summary									ANOVA summary
Tukey's multiple comparisons test	Mean Diff.	95.00% CI of diff.	Below threshold?	Summary	Adjusted P Value				F	22.21
1 vs. 2	0	-0.9829 to 0.9829	No	ns	>0.9999	A-B			P value	<0.0001
1 vs. 3	0	-0.9829 to 0.9829	No	ns	>0.9999	A-C			P value summary	****
1 vs. 4	0	-0.9829 to 0.9829	No	ns	>0.9999	A-D			Significant diff. among means (P < 0.05)?	Yes
1 vs. 5	0	-0.9829 to 0.9829	No	ns	>0.9999	A-E			R squared	0.9049
1 vs. 6	-1.356	-2.338 to -0.3727	Yes	**	0.0048	A-F
1 vs. 7	-2.383	-3.366 to -1.400	Yes	****	<0.0001	A-G			Brown-Forsythe test
2 vs. 3	0	-0.9829 to 0.9829	No	ns	>0.9999	B-C			F (DFn, DFd)	1.851 (6, 14)
2 vs. 4	0	-0.9829 to 0.9829	No	ns	>0.9999	B-D			P value	0.1606
2 vs. 5	0	-0.9829 to 0.9829	No	ns	>0.9999	B-E			P value summary	ns
2 vs. 6	-1.356	-2.338 to -0.3727	Yes	**	0.0048	B-F			Are SDs significantly different (P < 0.05)?	No
2 vs. 7	-2.383	-3.366 to -1.400	Yes	****	<0.0001	B-G
3 vs. 4	0	-0.9829 to 0.9829	No	ns	>0.9999	C-D			Bartlett's test
3 vs. 5	0	-0.9829 to 0.9829	No	ns	>0.9999	C-E			Bartlett's statistic (corrected)
3 vs. 6	-1.356	-2.338 to -0.3727	Yes	**	0.0048	C-F			P value
3 vs. 7	-2.383	-3.366 to -1.400	Yes	****	<0.0001	C-G			P value summary
4 vs. 5	0	-0.9829 to 0.9829	No	ns	>0.9999	D-E			Are SDs significantly different (P < 0.05)?
4 vs. 6	-1.356	-2.338 to -0.3727	Yes	**	0.0048	D-F
4 vs. 7	-2.383	-3.366 to -1.400	Yes	****	<0.0001	D-G			ANOVA table	SS	DF	MS	F (DFn, DFd)	P value
5 vs. 6	-1.356	-2.338 to -0.3727	Yes	**	0.0048	E-F			Treatment (between columns)	16.56	6	2.76	F (6, 14) = 22.21	P<0.0001
5 vs. 7	-2.383	-3.366 to -1.400	Yes	****	<0.0001	E-G			Residual (within columns)	1.74	14	0.1243
6 vs. 7	-1.028	-2.011 to -0.04473	Yes	*	0.0379	F-G			Total	18.3	20
									Data summary
									Number of treatments (columns)	7
									Number of values (total)	21

## Sheet: SFig 1d
SHH		Mature
	Day 0	Day 6	Day 12
1	0.790764	4.14735	60.605
2	0.663976	14.6113	35.4522
3	2.03766	0.928726	30.3639
4	0.39548	4.62872	43.9805
5	0.364963	4.66173	32.8511
6	0.66682
7
Average	0.819945	5.79557	40.6505
Stdev	0.619459	5.16642	12.2774
SE	0.252893	2.31049	5.49062
Unpaired t-tests
Table Analyzed	Shh			Table Analyzed	Shh
Column B	6			Column C	12
vs.	vs.			vs.	vs.
Column A	0			Column A	0
Unpaired t test				Unpaired t test
P value	0.0423			P value	<0.0001
P value summary	*			P value summary	****
Significantly different (P < 0.05)?	Yes			Significantly different (P < 0.05)?	Yes
One- or two-tailed P value?	Two-tailed			One- or two-tailed P value?	Two-tailed
t, df	t=2.365, df=9			t, df	t=8.024, df=9
How big is the difference?				How big is the difference?
Mean of column A	0.8199			Mean of column A	0.8199
Mean of column B	5.796			Mean of column C	40.65
Difference between means (B - A) ± SEM	4.976 ± 2.104			Difference between means (C - A) ± SEM	39.83 ± 4.964
95% confidence interval	0.2154 to 9.736			95% confidence interval	28.60 to 51.06
R squared (eta squared)	0.3832			R squared (eta squared)	0.8774
F test to compare variances				F test to compare variances
F, DFn, Dfd	69.56, 4, 5			F, DFn, Dfd	392.8, 4, 5
P value	0.0003			P value	<0.0001
P value summary	***			P value summary	****
Significantly different (P < 0.05)?	Yes			Significantly different (P < 0.05)?	Yes
Data analyzed				Data analyzed
Sample size, column A	6			Sample size, column A	6
Sample size, column B	5			Sample size, column C	5

## Sheet: SFig 1e
HAND2		Mature
	Day 0	Day 6	Day 12
1	0.737656	22.6127	28.1158
2	0.586844	19.6286	20.0395
3	5.90597	5.05767	27.1217
4	0.979553	25.8026	36.9688
5	0.609967	18.2207	25.1132
6	1.27708
7
Average	1.68284	18.2644	27.4718
Stdev	2.08517	7.93746	6.15492
SE	0.851268	3.54974	2.75256
Unpaired t-tests
Table Analyzed	Hand2			Table Analyzed	Hand2
Column B	6			Column C	12
vs.	vs.			vs.	vs.
Column A	0			Column A	0
Unpaired t test				Unpaired t test
P value	0.0008			P value	<0.0001
P value summary	***			P value summary	****
Significantly different (P < 0.05)?	Yes			Significantly different (P < 0.05)?	Yes
One- or two-tailed P value?	Two-tailed			One- or two-tailed P value?	Two-tailed
t, df	t=4.965, df=9			t, df	t=9.706, df=9
How big is the difference?				How big is the difference?
Mean of column A	1.683			Mean of column A	1.683
Mean of column B	18.26			Mean of column C	27.47
Difference between means (B - A) ± SEM	16.58 ± 3.340			Difference between means (C - A) ± SEM	25.79 ± 2.657
95% confidence interval	9.027 to 24.14			95% confidence interval	19.78 to 31.80
R squared (eta squared)	0.7326			R squared (eta squared)	0.9128
F test to compare variances				F test to compare variances
F, DFn, Dfd	14.49, 4, 5			F, DFn, Dfd	8.713, 4, 5
P value	0.0117			P value	0.0355
P value summary	*			P value summary	*
Significantly different (P < 0.05)?	Yes			Significantly different (P < 0.05)?	Yes
Data analyzed				Data analyzed
Sample size, column A	6			Sample size, column A	6
Sample size, column B	5			Sample size, column C	5

## Sheet: SFig 1f
FGF8		Mature
	Day 0	Day 6	Day 12
1	1.77711	10.8454	51.3773
2	2.59438	17.3886	10.9742
3	2.17677	2.2328	30.9433
4	2.24383	7.44823	13.9224
5	2.17919	8.02772	6.91904
6	2.44521
7
Average	2.23608	9.18856	22.8272
Stdev	0.279135	5.53953	18.3973
SE	0.113956	2.47735	8.22751
Unpaired t-tests
Table Analyzed	FGF8			Table Analyzed	FGF8
Column B	6			Column C	12
vs.	vs.			vs.	vs.
Column A	0			Column A	0
Unpaired t test				Unpaired t test
P value	0.0126			P value	0.0217
P value summary	*			P value summary	*
Significantly different (P < 0.05)?	Yes			Significantly different (P < 0.05)?	Yes
One- or two-tailed P value?	Two-tailed			One- or two-tailed P value?	Two-tailed
t, df	t=3.104, df=9			t, df	t=2.772, df=9
How big is the difference?				How big is the difference?
Mean of column A	2.236			Mean of column A	2.236
Mean of column B	9.189			Mean of column C	22.83
Difference between means (B - A) ± SEM	6.952 ± 2.240			Difference between means (C - A) ± SEM	20.59 ± 7.428
95% confidence interval	1.886 to 12.02			95% confidence interval	3.788 to 37.39
R squared (eta squared)	0.517			R squared (eta squared)	0.4606
F test to compare variances				F test to compare variances
F, DFn, Dfd	393.8, 4, 5			F, DFn, Dfd	4344, 4, 5
P value	<0.0001			P value	<0.0001
P value summary	****			P value summary	****
Significantly different (P < 0.05)?	Yes			Significantly different (P < 0.05)?	Yes
Data analyzed				Data analyzed
Sample size, column A	6			Sample size, column A	6
Sample size, column B	5			Sample size, column C	5

## Sheet: SFig 1h
**SHH data normalized to Uninjured Tissue***
Timepoint	Uninjured	4-days	7-days
	1.62882	124.503	0.11499
	0.474924	196.467	0.139823
	1.40332	164.685	0.0746958
	2.53421	196.774
	0.124292	132.58
	1.05674	78.3595
	0.493034	27.6727
	2.90942	389.396
	0.715378
	1.07586
	0.397982
Average	1.16491	163.805	0.109836
Stdev	0.895022	107.835	0.032868
SEM	0.269859	38.1253	0.0189764
Tukey Multiple Comparisons Test Summary									ANOVA summary
Number of families	1								Table Analyzed	Denervation Timecourse
Number of comparisons per family	3								Data sets analyzed	A-C
Alpha	0.05
									ANOVA summary
Tukey's multiple comparisons test	Mean Diff.	95.00% CI of diff.	Below threshold?	Summary	Adjusted P Value				F	15.76
Mat. vs. 4	-162.6	-239.9 to -85.37	Yes	***	0.0001	A-B			P value	<0.0001
Mat. vs. 7	1.055	-107.3 to 109.4	No	ns	0.9997	A-C			P value summary	****
4 vs. 7	163.7	51.12 to 276.3	Yes	**	0.0042	B-C			Significant diff. among means (P < 0.05)?	Yes
									R squared	0.6239
Test details	Mean 1	Mean 2	Mean Diff.	SE of diff.	n1	n2
Mat. vs. 4	1.165	163.8	-162.6	30.41	11	8			Brown-Forsythe test
Mat. vs. 7	1.165	0.1098	1.055	42.63	11	3			F (DFn, DFd)	6.264 (2, 19)
4 vs. 7	163.8	0.1098	163.7	44.31	8	3			P value	0.0081
									P value summary	**
									Are SDs significantly different (P < 0.05)?	Yes
									Bartlett's test
									Bartlett's statistic (corrected)
									P value
									P value summary
									Are SDs significantly different (P < 0.05)?
									ANOVA table	SS	DF	MS	F (DFn, DFd)	P value
									Treatment (between columns)	135040	2	67520	F (2, 19) = 15.76	P<0.0001
									Residual (within columns)	81406	19	4285
									Total	216447	21

[truncated: 8 more sheets: SFig 2a, SFig 2b, SFig 2d, SFig 2g, SFig 2h, Fig 3b, Fig 3d, Animal Lengths]
